# Supplementary material for: Action detection using a neural network elucidates the genetics of mouse grooming behavior
Source: eLife journal article supplement (doi:10.7554/elife.63207), 2021-03-17
Supplement: supp [file elife-63207-supp-v1.zip]

Archive with 26 entries (26 files):
- elife_poa_e63207_Supplementary_file_1.xlsx
- elife_poa_e63207_Video_1.mp4
- elife_poa_e63207_Video_2.mp4
- elife_poa_e63207_Video_3.mp4
- elife_poa_e63207_Video_4.mp4
- elife_poa_e63207_Video_5.mp4
- elife_poa_e63207_Video_6.mp4
- elife_poa_e63207_Video_7.mp4
- elife_poa_e63207_Video_8.mp4
- elife_poa_e63207_Video_9.mp4
- elife_poa_e63207_Transparent_Reporting_File.docx
- elife_poa_e63207_Supplementary_file_2.csv
- elife_poa_e63207_Figure_1_figure_supplement_1.pdf
- elife_poa_e63207_Figure_2_figure_supplement_1.pdf
- elife_poa_e63207_Figure_3_figure_supplement_1.pdf
- elife_poa_e63207_Figure_3_figure_supplement_2.pdf
- elife_poa_e63207_Figure_3_figure_supplement_3.pdf
- elife_poa_e63207_Figure_6_figure_supplement_1.pdf
- elife_poa_e63207_Figure_8_figure_supplement_1.pdf
- elife_poa_e63207_Figure_9_figure_supplement_1.png
- elife_poa_e63207_Figure_9_figure_supplement_2.png
- elife_poa_e63207_Figure_9_figure_supplement_3.png
- elife_poa_e63207_Figure_9_figure_supplement_4.png
- elife_poa_e63207_Figure_9_figure_supplement_5.png
- elife_poa_e63207_Figure_9_figure_supplement_6.png
- elife_poa_e63207_Figure_10_Figure_supplement_1.pdf
