# Supplementary material for: Action detection using a neural network elucidates the genetics of mouse grooming behavior
Source: eLife journal article supplement (doi:10.7554/elife.63207), 2021-03-17
Supplement: supp [file elife-63207-supp-v1.zip › elife_poa_e63207_Figure_3_figure_supplement_2.pdf]

**A****Both Near Perfect**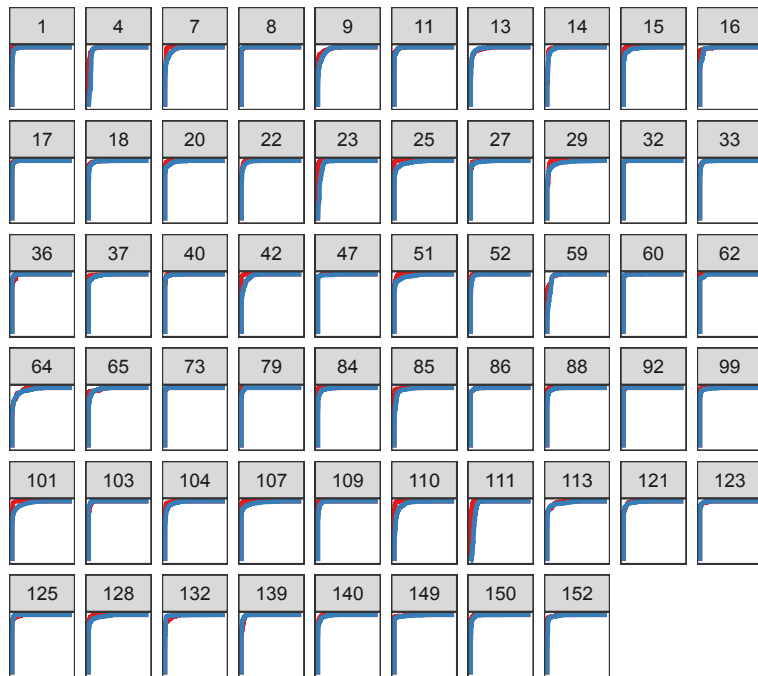**B****Both Acceptable**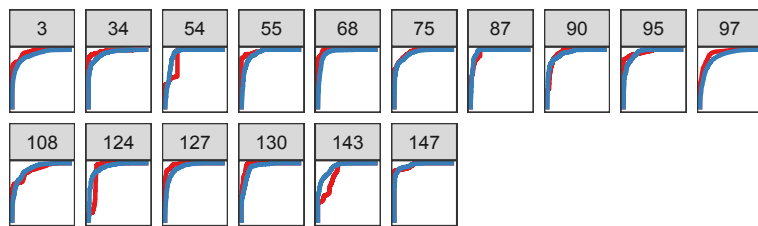**C****Neural Network Near Perfect, JAABA Acceptable**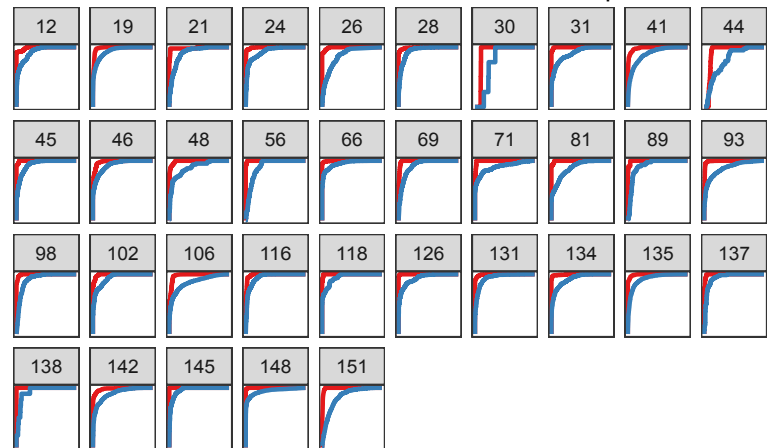**D****Both Poor**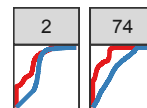**E****Neural Network Outperforms JAABA**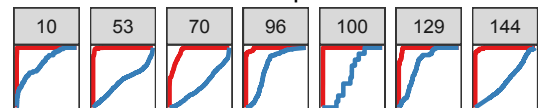**Approach**

- Final Neural Network Approach
- JAABA 20% Training Set
