# Supplementary material for: Action detection using a neural network elucidates the genetics of mouse grooming behavior
Source: eLife journal article supplement (doi:10.7554/elife.63207), 2021-03-17
Supplement: supp [file elife-63207-supp-v1.zip › elife_poa_e63207_Supplementary_file_1.xlsx]

## Sheet: GWAS_04082020_occurrencecou
Gene	Ouccurence	OFA_GroomAvgBout_first5m	OFA_Groom_first55m	OFA_Groom_first55m_linearslope	OFA_GroomBouts_first20m	OFA_GroomBouts_first55m	OFA_GroomBouts_first55m_linearslope	OFA_GroomPeakVal	OFA_GroomAvgBout_first55m	OFA_GroomAvgBout_first55m_linearslope	OFA_GroomPeakSlope	OFA_GroomAvgBout_first20m	OFA_Groom_first20m	OFA_Groom_first5m	OFA_DistanceTraveled_first55m	OFA_PeripheryTime_first20m	OFA_DistanceTraveled_first5m	OFA_CornerTime_first55m	OFA_GroomPeakMidBin	OFA_PeripheryTime_first55m	OFA_GroomBouts_first5m	OFA_PeripheryTime_first5m	OFA_CornerTime_first20m	OFA_DistanceTraveled_first20m	OFA_CornerTime_first5m	Use in Pathway analysis
Polygenicity	only 6 or more included	206	467	350	233	255	148	62	0	649	248	238	713	529	428	526	18	244	51	473	0	101	255	217	233
Sox5	11	1	1	0	1	1	1	0	0	0	1	1	1	0	0	0	0	0	0	0	0	0	1	1	1
Ctnna2	10	1	1	0	1	1	0	1	0	0	0	1	1	0	0	0	0	1	0	0	0	0	1	0	1
Grin2b	10	1	1	0	1	1	1	0	0	0	1	1	1	0	0	0	0	0	0	0	0	0	1	0	1
Iapp	10	1	1	0	1	1	1	0	0	0	1	1	1	0	0	0	0	0	0	0	0	0	1	0	1
Ldhb	10	1	1	0	1	1	1	0	0	0	1	1	1	0	0	0	0	0	0	0	0	0	1	0	1
Mgp	10	1	1	0	1	1	1	0	0	0	1	1	1	0	0	0	0	0	0	0	0	0	1	0	1
Reg3b	10	1	1	0	1	1	0	1	0	0	0	1	1	0	0	0	0	1	0	0	0	0	1	0	1
Reg1	10	1	1	0	1	1	0	1	0	0	0	1	1	0	0	0	0	1	0	0	0	0	1	0	1
Reg2	10	1	1	0	1	1	0	1	0	0	0	1	1	0	0	0	0	1	0	0	0	0	1	0	1
Tacr1	10	1	1	0	1	1	0	1	0	0	0	1	1	0	0	0	0	1	0	0	0	0	1	0	1
Arhgdib	10	1	1	0	1	1	1	0	0	0	1	1	1	0	0	0	0	0	0	0	0	0	1	0	1
Gm11077	10	1	1	0	1	1	1	0	0	0	1	1	1	0	0	0	0	0	0	0	0	0	1	0	1	No
Lmo3	10	1	1	0	1	1	1	0	0	0	1	1	1	0	0	0	0	0	0	0	0	0	1	0	1
Recql	10	1	1	0	1	1	1	0	0	0	1	1	1	0	0	0	0	0	0	0	0	0	1	0	1
Cdkn1b	10	1	1	0	1	1	1	0	0	0	1	1	1	0	0	0	0	0	0	0	0	0	1	0	1
Eps8	10	1	1	0	1	1	1	0	0	0	1	1	1	0	0	0	0	0	0	0	0	0	1	0	1
St8sia1	10	1	1	0	1	1	1	0	0	0	1	1	1	0	0	0	0	0	0	0	0	0	1	0	1
Capza3	10	1	1	0	1	1	1	0	0	0	1	1	1	0	0	0	0	0	0	0	0	0	1	0	1
Gucy2c	10	1	1	0	1	1	1	0	0	0	1	1	1	0	0	0	0	0	0	0	0	0	1	0	1
Dnah6	10	1	1	0	1	1	0	1	0	0	0	1	1	0	0	0	0	1	0	0	0	0	1	0	1
Aup1	10	1	1	0	1	1	0	1	0	0	0	1	1	0	0	0	0	1	0	0	0	0	1	0	1
Emp1	10	1	1	0	1	1	1	0	0	0	1	1	1	0	0	0	0	0	0	0	0	0	1	0	1
Etv6	10	1	1	0	1	1	1	0	0	0	1	1	1	0	0	0	0	0	0	0	0	0	1	0	1
Reg3g	10	1	1	0	1	1	0	1	0	0	0	1	1	0	0	0	0	1	0	0	0	0	1	0	1
Reg3a	10	1	1	0	1	1	0	1	0	0	0	1	1	0	0	0	0	1	0	0	0	0	1	0	1
Gpr19	10	1	1	0	1	1	1	0	0	0	1	1	1	0	0	0	0	0	0	0	0	0	1	0	1
Dok1	10	1	1	0	1	1	0	1	0	0	0	1	1	0	0	0	0	1	0	0	0	0	1	0	1
Ptpro	10	1	1	0	1	1	1	0	0	0	1	1	1	0	0	0	0	0	0	0	0	0	1	0	1
Kcnj8	10	1	1	0	1	1	1	0	0	0	1	1	1	0	0	0	0	0	0	0	0	0	1	0	1
Gsg1	10	1	1	0	1	1	1	0	0	0	1	1	1	0	0	0	0	0	0	0	0	0	1	0	1
Art4	10	1	1	0	1	1	1	0	0	0	1	1	1	0	0	0	0	0	0	0	0	0	1	0	1
Pik3c2g	10	1	1	0	1	1	1	0	0	0	1	1	1	0	0	0	0	0	0	0	0	0	1	0	1
Lrp6	10	1	1	0	1	1	1	0	0	0	1	1	1	0	0	0	0	0	0	0	0	0	1	0	1
Hk2	10	1	1	0	1	1	0	1	0	0	0	1	1	0	0	0	0	1	0	0	0	0	1	0	1
M1ap	10	1	1	0	1	1	0	1	0	0	0	1	1	0	0	0	0	1	0	0	0	0	1	0	1
Strap	10	1	1	0	1	1	1	0	0	0	1	1	1	0	0	0	0	0	0	0	0	0	1	0	1
Loxl3	10	1	1	0	1	1	0	1	0	0	0	1	1	0	0	0	0	1	0	0	0	0	1	0	1
Aebp2	10	1	1	0	1	1	1	0	0	0	1	1	1	0	0	0	0	0	0	0	0	0	1	0	1
Sema4f	10	1	1	0	1	1	0	1	0	0	0	1	1	0	0	0	0	1	0	0	0	0	1	0	1
Lbx2	10	1	1	0	1	1	0	1	0	0	0	1	1	0	0	0	0	1	0	0	0	0	1	0	1
Tlx2	10	1	1	0	1	1	0	1	0	0	0	1	1	0	0	0	0	1	0	0	0	0	1	0	1
Slco1a5	10	1	1	0	1	1	1	0	0	0	1	1	1	0	0	0	0	0	0	0	0	0	1	0	1
Slco1a1	10	1	1	0	1	1	1	0	0	0	1	1	1	0	0	0	0	0	0	0	0	0	1	0	1
Slco1a4	10	1	1	0	1	1	1	0	0	0	1	1	1	0	0	0	0	0	0	0	0	0	1	0	1
Slco1b2	10	1	1	0	1	1	1	0	0	0	1	1	1	0	0	0	0	0	0	0	0	0	1	0	1
Slco1a6	10	1	1	0	1	1	1	0	0	0	1	1	1	0	0	0	0	0	0	0	0	0	1	0	1
Abcc9	10	1	1	0	1	1	1	0	0	0	1	1	1	0	0	0	0	0	0	0	0	0	1	0	1
Reg3d	10	1	1	0	1	1	0	1	0	0	0	1	1	0	0	0	0	1	0	0	0	0	1	0	1
Igbp1b	10	1	1	0	1	1	1	0	0	0	1	1	1	0	0	0	0	0	0	0	0	0	1	0	1
Atf7ip	10	1	1	0	1	1	1	0	0	0	1	1	1	0	0	0	0	0	0	0	0	0	1	0	1
Pde3a	10	1	1	0	1	1	1	0	0	0	1	1	1	0	0	0	0	0	0	0	0	0	1	0	1
Crebl2	10	1	1	0	1	1	1	0	0	0	1	1	1	0	0	0	0	0	0	0	0	0	1	0	1
Slco1c1	10	1	1	0	1	1	1	0	0	0	1	1	1	0	0	0	0	0	0	0	0	0	1	0	1
Wbp11	10	1	1	0	1	1	1	0	0	0	1	1	1	0	0	0	0	0	0	0	0	0	1	0	1
Mrpl19	10	1	1	0	1	1	0	1	0	0	0	1	1	0	0	0	0	1	0	0	0	0	1	0	1
Suclg1	10	1	1	0	1	1	0	1	0	0	0	1	1	0	0	0	0	1	0	0	0	0	1	0	1
Htra2	10	1	1	0	1	1	0	1	0	0	0	1	1	0	0	0	0	1	0	0	0	0	1	0	1
Dera	10	1	1	0	1	1	1	0	0	0	1	1	1	0	0	0	0	0	0	0	0	0	1	0	1
Mgst1	10	1	1	0	1	1	1	0	0	0	1	1	1	0	0	0	0	0	0	0	0	0	1	0	1
4931417E11Rik	10	1	1	0	1	1	0	1	0	0	0	1	1	0	0	0	0	1	0	0	0	0	1	0	1
Bcl2l14	10	1	1	0	1	1	1	0	0	0	1	1	1	0	0	0	0	0	0	0	0	0	1	0	1
Plbd1	10	1	1	0	1	1	1	0	0	0	1	1	1	0	0	0	0	0	0	0	0	0	1	0	1
Golt1b	10	1	1	0	1	1	1	0	0	0	1	1	1	0	0	0	0	0	0	0	0	0	1	0	1
Pole4	10	1	1	0	1	1	0	1	0	0	0	1	1	0	0	0	0	1	0	0	0	0	1	0	1
Mansc1	10	1	1	0	1	1	1	0	0	0	1	1	1	0	0	0	0	0	0	0	0	0	1	0	1
Ddx47	10	1	1	0	1	1	1	0	0	0	1	1	1	0	0	0	0	0	0	0	0	0	1	0	1
Borcs5	10	1	1	0	1	1	1	0	0	0	1	1	1	0	0	0	0	0	0	0	0	0	1	0	1
Erp27	10	1	1	0	1	1	1	0	0	0	1	1	1	0	0	0	0	0	0	0	0	0	1	0	1
Pcgf1	10	1	1	0	1	1	0	1	0	0	0	1	1	0	0	0	0	1	0	0	0	0	1	0	1
Dusp16	10	1	1	0	1	1	1	0	0	0	1	1	1	0	0	0	0	0	0	0	0	0	1	0	1
Fam234b	10	1	1	0	1	1	1	0	0	0	1	1	1	0	0	0	0	0	0	0	0	0	1	0	1
C2cd5	10	1	1	0	1	1	1	0	0	0	1	1	1	0	0	0	0	0	0	0	0	0	1	0	1
Etnk1	10	1	1	0	1	1	1	0	0	0	1	1	1	0	0	0	0	0	0	0	0	0	1	0	1
Pbp2	10	1	1	0	1	1	1	0	0	0	1	1	1	0	0	0	0	0	0	0	0	0	1	0	1
Plekha5	10	1	1	0	1	1	1	0	0	0	1	1	1	0	0	0	0	0	0	0	0	0	1	0	1
Pde6h	10	1	1	0	1	1	1	0	0	0	1	1	1	0	0	0	0	0	0	0	0	0	1	0	1
Gprc5d	10	1	1	0	1	1	1	0	0	0	1	1	1	0	0	0	0	0	0	0	0	0	1	0	1
Dqx1	10	1	1	0	1	1	0	1	0	0	0	1	1	0	0	0	0	1	0	0	0	0	1	0	1
Gcfc2	10	1	1	0	1	1	0	1	0	0	0	1	1	0	0	0	0	1	0	0	0	0	1	0	1
E330021D16Rik	10	1	1	0	1	1	1	0	0	0	1	1	1	0	0	0	0	0	0	0	0	0	1	0	1
Plcz1	10	1	1	0	1	1	1	0	0	0	1	1	1	0	0	0	0	0	0	0	0	0	1	0	1
Gm20594	10	1	1	0	1	1	0	1	0	0	0	1	1	0	0	0	0	1	0	0	0	0	1	0	1	No
Spx	10	1	1	0	1	1	1	0	0	0	1	1	1	0	0	0	0	0	0	0	0	0	1	0	1
Smco3	10	1	1	0	1	1	1	0	0	0	1	1	1	0	0	0	0	0	0	0	0	0	1	0	1
Hist4h4	10	1	1	0	1	1	1	0	0	0	1	1	1	0	0	0	0	0	0	0	0	0	1	0	1
Gys2	10	1	1	0	1	1	1	0	0	0	1	1	1	0	0	0	0	0	0	0	0	0	1	0	1
Lrrtm1	10	1	1	0	1	1	0	1	0	0	0	1	1	0	0	0	0	1	0	0	0	0	1	0	1
Lrrtm4	10	1	1	0	1	1	0	1	0	0	0	1	1	0	0	0	0	1	0	0	0	0	1	0	1
Gprc5a	10	1	1	0	1	1	1	0	0	0	1	1	1	0	0	0	0	0	0	0	0	0	1	0	1
Rerg	10	1	1	0	1	1	1	0	0	0	1	1	1	0	0	0	0	0	0	0	0	0	1	0	1
Eva1a	10	1	1	0	1	1	0	1	0	0	0	1	1	0	0	0	0	1	0	0	0	0	1	0	1
Pyroxd1	10	1	1	0	1	1	1	0	0	0	1	1	1	0	0	0	0	0	0	0	0	0	1	0	1
Sult6b2	10	1	1	0	1	1	1	0	0	0	1	1	1	0	0	0	0	0	0	0	0	0	1	0	1
Apold1	10	1	1	0	1	1	1	0	0	0	1	1	1	0	0	0	0	0	0	0	0	0	1	0	1
BC049715	10	1	1	0	1	1	1	0	0	0	1	1	1	0	0	0	0	0	0	0	0	0	1	0	1
H2afj	10	1	1	0	1	1	1	0	0	0	1	1	1	0	0	0	0	0	0	0	0	0	1	0	1
Slc15a5	10	1	1	0	1	1	1	0	0	0	1	1	1	0	0	0	0	0	0	0	0	0	1	0	1
Rergl	10	1	1	0	1	1	1	0	0	0	1	1	1	0	0	0	0	0	0	0	0	0	1	0	1
Gm5724	10	1	1	0	1	1	1	0	0	0	1	1	1	0	0	0	0	0	0	0	0	0	1	0	1	No
Gm9008	10	1	1	0	1	1	0	1	0	0	0	1	1	0	0	0	0	1	0	0	0	0	1	0	1	No
Gm8994	10	1	1	0	1	1	1	0	0	0	1	1	1	0	0	0	0	0	0	0	0	0	1	0	1	No
Tuba3a	10	1	1	0	1	1	1	0	0	0	0	1	1	0	0	0	0	0	0	0	0	0	1	1	1
Gm6614	10	1	1	0	1	1	1	0	0	0	1	1	1	0	0	0	0	0	0	0	0	0	1	0	1	No
Gnal	9	1	0	1	0	0	1	0	0	1	1	1	1	0	0	0	0	0	0	0	0	1	0	1	0
Grp	9	1	0	1	0	0	1	0	0	1	1	1	1	0	0	0	0	0	0	0	0	1	0	1	0
Kap	9	1	1	0	1	1	1	0	0	0	1	1	0	0	0	0	0	0	0	0	0	0	1	0	1
Kras	9	1	0	0	1	1	1	0	0	0	0	1	1	0	0	0	0	0	0	0	0	0	1	1	1
Mc2r	9	1	0	1	0	0	1	0	0	1	1	1	1	0	0	0	0	0	0	0	0	1	0	1	0
Ptpn2	9	1	0	1	0	0	1	0	0	1	1	1	1	0	0	0	0	0	0	0	0	1	0	1	0
Itpr2	9	1	0	0	1	1	1	0	0	0	0	1	1	0	0	0	0	0	0	0	0	0	1	1	1
Mc5r	9	1	0	1	0	0	1	0	0	1	1	1	1	0	0	0	0	0	0	0	0	1	0	1	0
Mc4r	9	1	0	1	0	0	1	0	0	1	1	1	1	0	0	0	0	0	0	0	0	1	0	1	0
Atp6v1b1	9	0	1	0	1	1	0	1	0	0	0	1	1	0	0	0	0	1	0	0	0	0	1	0	1
Mitf	9	0	1	0	0	1	0	0	0	1	1	0	1	1	0	1	0	0	0	0	0	0	1	1	0
Actg2	9	0	1	0	1	1	0	1	0	0	0	1	1	0	0	0	0	1	0	0	0	0	1	0	1
Wbp1	9	0	1	0	1	1	0	1	0	0	0	1	1	0	0	0	0	1	0	0	0	0	1	0	1
Bcat1	9	1	0	0	1	1	1	0	0	0	0	1	1	0	0	0	0	0	0	0	0	0	1	1	1
Rtkn	9	0	1	0	1	1	0	1	0	0	0	1	1	0	0	0	0	1	0	0	0	0	1	0	1
Dctn1	9	0	1	0	1	1	0	1	0	0	0	1	1	0	0	0	0	1	0	0	0	0	1	0	1
Lrmp	9	1	0	0	1	1	1	0	0	0	0	1	1	0	0	0	0	0	0	0	0	0	1	1	1
Rax	9	1	0	1	0	0	1	0	0	1	1	1	1	0	0	0	0	0	0	0	0	1	0	1	0
Tex261	9	0	1	0	1	1	0	1	0	0	0	1	1	0	0	0	0	1	0	0	0	0	1	0	1
Zfp638	9	0	1	0	1	1	0	1	0	0	0	1	1	0	0	0	0	1	0	0	0	0	1	0	1
Cidea	9	1	0	1	0	0	1	0	0	1	1	1	1	0	0	0	0	0	0	0	0	1	0	1	0
Ldlrad4	9	1	0	1	0	0	1	0	0	1	1	1	1	0	0	0	0	0	0	0	0	1	0	1	0
Mthfd2	9	0	1	0	1	1	0	1	0	0	0	1	1	0	0	0	0	1	0	0	0	0	1	0	1
Uba3	9	0	1	0	0	1	0	0	0	1	1	0	1	1	0	1	0	0	0	0	0	0	1	1	0
Vax2	9	0	1	0	1	1	0	1	0	0	0	1	1	0	0	0	0	1	0	0	0	0	1	0	1
Med21	9	1	0	0	1	1	1	0	0	0	0	1	1	0	0	0	0	0	0	0	0	0	1	1	1
Dguok	9	0	1	0	1	1	0	1	0	0	0	1	1	0	0	0	0	1	0	0	0	0	1	0	1
Sspn	9	1	0	0	1	1	1	0	0	0	0	1	1	0	0	0	0	0	0	0	0	0	1	1	1
Clec4f	9	0	1	0	1	1	0	1	0	0	0	1	1	0	0	0	0	1	0	0	0	0	1	0	1
Nagk	9	0	1	0	1	1	0	1	0	0	0	1	1	0	0	0	0	1	0	0	0	0	1	0	1
Arl6ip5	9	0	1	0	0	1	0	0	0	1	1	0	1	1	0	1	0	0	0	0	0	0	1	1	0
Mogs	9	0	1	0	1	1	0	1	0	0	0	1	1	0	0	0	0	1	0	0	0	0	1	0	1
Sec11c	9	1	0	1	0	0	1	0	0	1	1	1	1	0	0	0	0	0	0	0	0	1	0	1	0
Fam210a	9	1	0	1	0	0	1	0	0	1	1	1	1	0	0	0	0	0	0	0	0	1	0	1	0
Foxp1	9	0	1	0	0	1	0	0	0	1	1	0	1	1	0	1	0	0	0	0	0	0	1	1	0
Chmp1b	9	1	0	1	0	0	1	0	0	1	1	1	1	0	0	0	0	0	0	0	0	1	0	1	0
Smim10l1	9	1	1	0	1	1	1	0	0	0	1	1	0	0	0	0	0	0	0	0	0	0	1	0	1
Fgfr1op2	9	1	0	0	1	1	1	0	0	0	0	1	1	0	0	0	0	0	0	0	0	0	1	1	1
Ppfibp1	9	1	0	0	1	1	1	0	0	0	0	1	1	0	0	0	0	0	0	0	0	0	1	1	1
Tm7sf3	9	1	0	0	1	1	1	0	0	0	0	1	1	0	0	0	0	0	0	0	0	0	1	1	1
Etfrf1	9	1	0	0	1	1	1	0	0	0	0	1	1	0	0	0	0	0	0	0	0	0	1	1	1
Rnmt	9	1	0	1	0	0	1	0	0	1	1	1	1	0	0	0	0	0	0	0	0	1	0	1	0
Tubb6	9	1	0	1	0	0	1	0	0	1	1	1	1	0	0	0	0	0	0	0	0	1	0	1	0
Spire1	9	1	0	1	0	0	1	0	0	1	1	1	1	0	0	0	0	0	0	0	0	1	0	1	0
Mrpl53	9	0	1	0	1	1	0	1	0	0	0	1	1	0	0	0	0	1	0	0	0	0	1	0	1
Smco2	9	1	0	0	1	1	1	0	0	0	0	1	1	0	0	0	0	0	0	0	0	0	1	1	1
Afg3l2	9	1	0	1	0	0	1	0	0	1	1	1	1	0	0	0	0	0	0	0	0	1	0	1	0
Ino80b	9	0	1	0	1	1	0	1	0	0	0	1	1	0	0	0	0	1	0	0	0	0	1	0	1
Lman1	9	1	0	1	0	0	1	0	0	1	1	1	1	0	0	0	0	0	0	0	0	1	0	1	0
Stambp	9	0	1	0	1	1	0	1	0	0	0	1	1	0	0	0	0	1	0	0	0	0	1	0	1
Cep192	9	1	0	1	0	0	1	0	0	1	1	1	1	0	0	0	0	0	0	0	0	1	0	1	0
Ints13	9	1	0	0	1	1	1	0	0	0	0	1	1	0	0	0	0	0	0	0	0	0	1	1	1
Rassf8	9	1	0	0	1	1	1	0	0	0	0	1	1	0	0	0	0	0	0	0	0	0	1	1	1
5530400C23Rik	9	1	1	0	1	1	1	0	0	0	1	1	0	0	0	0	0	0	0	0	0	0	1	0	1
1700003E16Rik	9	0	1	0	1	1	0	1	0	0	0	1	1	0	0	0	0	1	0	0	0	0	1	0	1
Seh1l	9	1	0	1	0	0	1	0	0	1	1	1	1	0	0	0	0	0	0	0	0	1	0	1	0
1700034J05Rik	9	1	0	0	1	1	1	0	0	0	0	1	1	0	0	0	0	0	0	0	0	0	1	1	1
Lmntd1	9	1	0	0	1	1	1	0	0	0	0	1	1	0	0	0	0	0	0	0	0	0	1	1	1
Stk38l	9	1	0	0	1	1	1	0	0	0	0	1	1	0	0	0	0	0	0	0	0	0	1	1	1
Ankrd53	9	0	1	0	1	1	0	1	0	0	0	1	1	0	0	0	0	1	0	0	0	0	1	0	1
Psmg2	9	1	0	1	0	0	1	0	0	1	1	1	1	0	0	0	0	0	0	0	0	1	0	1	0
Wdr54	9	0	1	0	1	1	0	1	0	0	0	1	1	0	0	0	0	1	0	0	0	0	1	0	1
Cep76	9	1	0	1	0	0	1	0	0	1	1	1	1	0	0	0	0	0	0	0	0	1	0	1	0
Bola3	9	0	1	0	1	1	0	1	0	0	0	1	1	0	0	0	0	1	0	0	0	0	1	0	1
Pmaip1	9	1	0	1	0	0	1	0	0	1	1	1	1	0	0	0	0	0	0	0	0	1	0	1	0
Bhlhe41	9	1	0	0	1	1	1	0	0	0	0	1	1	0	0	0	0	0	0	0	0	0	1	1	1
Eogt	9	0	1	0	0	1	0	0	0	1	1	0	1	1	0	1	0	0	0	0	0	0	1	1	0
Frmd4b	9	0	1	0	0	1	0	0	0	1	1	0	1	1	0	1	0	0	0	0	0	0	1	1	0
Tas2r103	9	1	1	0	1	1	1	0	0	0	1	1	0	0	0	0	0	0	0	0	0	0	1	0	1	No
Tas2r116	9	1	1	0	1	1	1	0	0	0	1	1	0	0	0	0	0	0	0	0	0	0	1	0	1	No
Impa2	9	1	0	1	0	0	1	0	0	1	1	1	1	0	0	0	0	0	0	0	0	1	0	1	0
Cd207	9	0	1	0	1	1	0	1	0	0	0	1	1	0	0	0	0	1	0	0	0	0	1	0	1
Mob1a	9	0	1	0	1	1	0	1	0	0	0	1	1	0	0	0	0	1	0	0	0	0	1	0	1
Prelid3a	9	1	0	1	0	0	1	0	0	1	1	1	1	0	0	0	0	0	0	0	0	1	0	1	0
Slc4a5	9	0	1	0	1	1	0	1	0	0	0	1	1	0	0	0	0	1	0	0	0	0	1	0	1
Lmod3	9	0	1	0	0	1	0	0	0	1	1	0	1	1	0	1	0	0	0	0	0	0	1	1	0
Fam19a4	9	0	1	0	0	1	0	0	0	1	1	0	1	1	0	1	0	0	0	0	0	0	1	1	0
Ccbe1	9	1	0	1	0	0	1	0	0	1	1	1	1	0	0	0	0	0	0	0	0	1	0	1	0
Mppe1	9	1	0	1	0	0	1	0	0	1	1	1	1	0	0	0	0	0	0	0	0	1	0	1	0
Paip2b	9	0	1	0	1	1	0	1	0	0	0	1	1	0	0	0	0	1	0	0	0	0	1	0	1
Tas2r102	9	1	1	0	1	1	1	0	0	0	1	1	0	0	0	0	0	0	0	0	0	0	1	0	1	No
Tas2r109	9	1	1	0	1	1	1	0	0	0	1	1	0	0	0	0	0	0	0	0	0	0	1	0	1	No
Tas2r110	9	1	1	0	1	1	1	0	0	0	1	1	0	0	0	0	0	0	0	0	0	0	1	0	1	No
Tas2r113	9	1	1	0	1	1	1	0	0	0	1	1	0	0	0	0	0	0	0	0	0	0	1	0	1	No
Tas2r115	9	1	1	0	1	1	1	0	0	0	1	1	0	0	0	0	0	0	0	0	0	0	1	0	1	No
Tas2r117	9	1	1	0	1	1	1	0	0	0	1	1	0	0	0	0	0	0	0	0	0	0	1	0	1	No
Tas2r120	9	1	1	0	1	1	1	0	0	0	1	1	0	0	0	0	0	0	0	0	0	0	1	0	1	No
Tas2r121	9	1	1	0	1	1	1	0	0	0	1	1	0	0	0	0	0	0	0	0	0	0	1	0	1	No
Tas2r122	9	1	1	0	1	1	1	0	0	0	1	1	0	0	0	0	0	0	0	0	0	0	1	0	1	No
Tas2r123	9	1	1	0	1	1	1	0	0	0	1	1	0	0	0	0	0	0	0	0	0	0	1	0	1	No
Tas2r124	9	1	1	0	1	1	1	0	0	0	1	1	0	0	0	0	0	0	0	0	0	0	1	0	1	No
Tas2r125	9	1	1	0	1	1	1	0	0	0	1	1	0	0	0	0	0	0	0	0	0	0	1	0	1	No
Tas2r129	9	1	1	0	1	1	1	0	0	0	1	1	0	0	0	0	0	0	0	0	0	0	1	0	1	No
Tas2r131	9	1	1	0	1	1	1	0	0	0	1	1	0	0	0	0	0	0	0	0	0	0	1	0	1	No
Tas2r140	9	1	1	0	1	1	1	0	0	0	1	1	0	0	0	0	0	0	0	0	0	0	1	0	1	No
Tas2r136	9	1	1	0	1	1	1	0	0	0	1	1	0	0	0	0	0	0	0	0	0	0	1	0	1	No
Arntl2	9	1	0	0	1	1	1	0	0	0	0	1	1	0	0	0	0	0	0	0	0	0	1	1	1
Tmf1	9	0	1	0	0	1	0	0	0	1	1	0	1	1	0	1	0	0	0	0	0	0	1	1	0
Gm765	9	0	1	0	0	1	0	0	0	1	1	0	1	1	0	1	0	0	0	0	0	0	1	1	0	No
Cplx4	9	1	0	1	0	0	1	0	0	1	1	1	1	0	0	0	0	0	0	0	0	1	0	1	0
A630073D07Rik	9	1	1	0	1	1	1	0	0	0	1	1	0	0	0	0	0	0	0	0	0	0	1	0	1
Tet3	9	0	1	0	1	1	0	1	0	0	0	1	1	0	0	0	0	1	0	0	0	0	1	0	1
Ccdc142	9	0	1	0	1	1	0	1	0	0	0	1	1	0	0	0	0	1	0	0	0	0	1	0	1
Aco2	8	0	1	1	0	0	0	0	0	1	0	0	1	1	1	1	0	0	0	1	0	0	0	0	0
Arc	8	0	1	1	0	0	0	0	0	1	0	0	1	1	1	1	0	0	0	1	0	0	0	0	0
Atf4	8	0	1	1	0	0	0	0	0	1	0	0	1	1	1	1	0	0	0	1	0	0	0	0	0
Tspo	8	0	1	1	0	0	0	0	0	1	0	0	1	1	1	1	0	0	0	1	0	0	0	0	0
Col7a1	8	0	0	0	0	0	0	0	0	1	0	0	1	1	1	1	0	1	1	1	0	0	0	0	0
Cyp11b1	8	0	1	1	0	0	0	0	0	1	0	0	1	1	1	1	0	0	0	1	0	0	0	0	0
Cyp11b2	8	0	1	1	0	0	0	0	0	1	0	0	1	1	1	1	0	0	0	1	0	0	0	0	0
Cyb5r3	8	0	1	1	0	0	0	0	0	1	0	0	1	1	1	1	0	0	0	1	0	0	0	0	0
Ptk2	8	0	1	1	0	0	0	0	0	1	0	0	1	1	1	1	0	0	0	1	0	0	0	0	0
Xrcc6	8	0	1	1	0	0	0	0	0	1	0	0	1	1	1	1	0	0	0	1	0	0	0	0	0
Gpt	8	0	1	1	0	0	0	0	0	1	0	0	1	1	1	1	0	0	0	1	0	0	0	0	0
H1f0	8	0	1	1	0	0	0	0	0	1	0	0	1	1	1	1	0	0	0	1	0	0	0	0	0
Hsf1	8	0	1	1	0	0	0	0	0	1	0	0	1	1	1	1	0	0	0	1	0	0	0	0	0
Il2rb	8	0	1	1	0	0	0	0	0	1	0	0	1	1	1	1	0	0	0	1	0	0	0	0	0
Lgals1	8	0	1	1	0	0	0	0	0	1	0	0	1	1	1	1	0	0	0	1	0	0	0	0	0
Ltf	8	0	0	0	0	0	0	0	0	1	0	0	1	1	1	1	0	1	1	1	0	0	0	0	0
Ly6d	8	0	1	1	0	0	0	0	0	1	0	0	1	1	1	1	0	0	0	1	0	0	0	0	0
Ly6c1	8	0	1	1	0	0	0	0	0	1	0	0	1	1	1	1	0	0	0	1	0	0	0	0	0
Maff	8	0	1	1	0	0	0	0	0	1	0	0	1	1	1	1	0	0	0	1	0	0	0	0	0
Mb	8	0	1	1	0	0	0	0	0	1	0	0	1	1	1	1	0	0	0	1	0	0	0	0	0
Map4	8	0	0	0	0	0	0	0	0	1	0	0	1	1	1	1	0	1	1	1	0	0	0	0	0
Myl3	8	0	0	0	0	0	0	0	0	1	0	0	1	1	1	1	0	1	1	1	0	0	0	0	0
Pdgfb	8	0	1	1	0	0	0	0	0	1	0	0	1	1	1	1	0	0	0	1	0	0	0	0	0
Pthlh	8	1	0	0	1	1	1	0	0	0	0	1	1	0	0	0	0	0	0	0	0	0	1	0	1
Pth1r	8	0	0	0	0	0	0	0	0	1	0	0	1	1	1	1	0	1	1	1	0	0	0	0	0
Pvalb	8	0	1	1	0	0	0	0	0	1	0	0	1	1	1	1	0	0	0	1	0	0	0	0	0
Rac2	8	0	1	1	0	0	0	0	0	1	0	0	1	1	1	1	0	0	0	1	0	0	0	0	0
Sstr3	8	0	1	1	0	0	0	0	0	1	0	0	1	1	1	1	0	0	0	1	0	0	0	0	0
Sox10	8	0	1	1	0	0	0	0	0	1	0	0	1	1	1	1	0	0	0	1	0	0	0	0	0
Tdgf1	8	0	0	0	0	0	0	0	0	1	0	0	1	1	1	1	0	1	1	1	0	0	0	0	0
Tef	8	0	1	1	0	0	0	0	0	1	0	0	1	1	1	1	0	0	0	1	0	0	0	0	0
Smpd5	8	0	1	1	0	0	0	0	0	1	0	0	1	1	1	1	0	0	0	1	0	0	0	0	0
Tst	8	0	1	1	0	0	0	0	0	1	0	0	1	1	1	1	0	0	0	1	0	0	0	0	0
Tsta3	8	0	1	1	0	0	0	0	0	1	0	0	1	1	1	1	0	0	0	1	0	0	0	0	0
Upk3a	8	0	1	1	0	0	0	0	0	1	0	0	1	1	1	1	0	0	0	1	0	0	0	0	0
Zfp41	8	0	1	1	0	0	0	0	0	1	0	0	1	1	1	1	0	0	0	1	0	0	0	0	0
Zfp7	8	0	1	1	0	0	0	0	0	1	0	0	1	1	1	1	0	0	0	1	0	0	0	0	0
Cntn3	8	0	1	0	0	1	0	0	0	1	1	0	1	0	0	1	0	0	0	0	0	0	1	1	0
Mlh1	8	0	0	0	0	0	0	0	0	1	0	0	1	1	1	1	0	1	1	1	0	0	0	0	0
Scx	8	0	1	1	0	0	0	0	0	1	0	0	1	1	1	1	0	0	0	1	0	0	0	0	0
Rangap1	8	0	1	1	0	0	0	0	0	1	0	0	1	1	1	1	0	0	0	1	0	0	0	0	0
Cdc25a	8	0	0	0	0	0	0	0	0	1	0	0	1	1	1	1	0	1	1	1	0	0	0	0	0
Adsl	8	0	1	1	0	0	0	0	0	1	0	0	1	1	1	1	0	0	0	1	0	0	0	0	0
Mgat3	8	0	1	1	0	0	0	0	0	1	0	0	1	1	1	1	0	0	0	1	0	0	0	0	0
Sh3bp1	8	0	1	1	0	0	0	0	0	1	0	0	1	1	1	1	0	0	0	1	0	0	0	0	0
Kcnj4	8	0	1	1	0	0	0	0	0	1	0	0	1	1	1	1	0	0	0	1	0	0	0	0	0
Dmc1	8	0	1	1	0	0	0	0	0	1	0	0	1	1	1	1	0	0	0	1	0	0	0	0	0
Micall1	8	0	1	1	0	0	0	0	0	1	0	0	1	1	1	1	0	0	0	1	0	0	0	0	0
Ngp	8	0	0	0	0	0	0	0	0	1	0	0	1	1	1	1	0	1	1	1	0	0	0	0	0
Jrk	8	0	1	1	0	0	0	0	0	1	0	0	1	1	1	1	0	0	0	1	0	0	0	0	0
Desi1	8	0	1	1	0	0	0	0	0	1	0	0	1	1	1	1	0	0	0	1	0	0	0	0	0
Foxred2	8	0	1	1	0	0	0	0	0	1	0	0	1	1	1	1	0	0	0	1	0	0	0	0	0
Mpped1	8	0	1	1	0	0	0	0	0	1	0	0	1	1	1	1	0	0	0	1	0	0	0	0	0
Ly6e	8	0	1	1	0	0	0	0	0	1	0	0	1	1	1	1	0	0	0	1	0	0	0	0	0
Srebf2	8	0	1	1	0	0	0	0	0	1	0	0	1	1	1	1	0	0	0	1	0	0	0	0	0
Myh9	8	0	1	1	0	0	0	0	0	1	0	0	1	1	1	1	0	0	0	1	0	0	0	0	0
Arhgap39	8	0	1	1	0	0	0	0	0	1	0	0	1	1	1	1	0	0	0	1	0	0	0	0	0
Tcf20	8	0	1	1	0	0	0	0	0	1	0	0	1	1	1	1	0	0	0	1	0	0	0	0	0
Camp	8	0	0	0	0	0	0	0	0	1	0	0	1	1	1	1	0	1	1	1	0	0	0	0	0
Ncf4	8	0	1	1	0	0	0	0	0	1	0	0	1	1	1	1	0	0	0	1	0	0	0	0	0
Kifc2	8	0	1	1	0	0	0	0	0	1	0	0	1	1	1	1	0	0	0	1	0	0	0	0	0
Gtpbp1	8	0	1	1	0	0	0	0	0	1	0	0	1	1	1	1	0	0	0	1	0	0	0	0	0
Snu13	8	0	1	1	0	0	0	0	0	1	0	0	1	1	1	1	0	0	0	1	0	0	0	0	0
Pick1	8	0	1	1	0	0	0	0	0	1	0	0	1	1	1	1	0	0	0	1	0	0	0	0	0
Lgals2	8	0	1	1	0	0	0	0	0	1	0	0	1	1	1	1	0	0	0	1	0	0	0	0	0
Mfng	8	0	1	1	0	0	0	0	0	1	0	0	1	1	1	1	0	0	0	1	0	0	0	0	0
Kif9	8	0	0	0	0	0	0	0	0	1	0	0	1	1	1	1	0	1	1	1	0	0	0	0	0
Rhpn1	8	0	1	1	0	0	0	0	0	1	0	0	1	1	1	1	0	0	0	1	0	0	0	0	0
Cbx7	8	0	1	1	0	0	0	0	0	1	0	0	1	1	1	1	0	0	0	1	0	0	0	0	0
Stac	8	0	0	0	0	0	0	0	0	1	0	0	1	1	1	1	0	1	1	1	0	0	0	0	0
Gpr27	8	0	1	0	0	1	0	0	0	1	1	0	1	0	0	1	0	0	0	0	0	0	1	1	0
Gpaa1	8	0	1	1	0	0	0	0	0	1	0	0	1	1	1	1	0	0	0	1	0	0	0	0	0
Smarcc1	8	0	0	0	0	0	0	0	0	1	0	0	1	1	1	1	0	1	1	1	0	0	0	0	0
Bik	8	0	1	1	0	0	0	0	0	1	0	0	1	1	1	1	0	0	0	1	0	0	0	0	0
Naga	8	0	1	1	0	0	0	0	0	1	0	0	1	1	1	1	0	0	0	1	0	0	0	0	0
Npcd	8	0	1	1	0	0	0	0	0	1	0	0	1	1	1	1	0	0	0	1	0	0	0	0	0
Ep300	8	0	1	1	0	0	0	0	0	1	0	0	1	1	1	1	0	0	0	1	0	0	0	0	0
Ptp4a3	8	0	1	1	0	0	0	0	0	1	0	0	1	1	1	1	0	0	0	1	0	0	0	0	0
Plec	8	0	1	1	0	0	0	0	0	1	0	0	1	1	1	1	0	0	0	1	0	0	0	0	0
Slc52a2	8	0	1	1	0	0	0	0	0	1	0	0	1	1	1	1	0	0	0	1	0	0	0	0	0
Cacng2	8	0	1	1	0	0	0	0	0	1	0	0	1	1	1	1	0	0	0	1	0	0	0	0	0
Zc3h7b	8	0	1	1	0	0	0	0	0	1	0	0	1	1	1	1	0	0	0	1	0	0	0	0	0
Trex1	8	0	0	0	0	0	0	0	0	1	0	0	1	1	1	1	0	1	1	1	0	0	0	0	0
Syngr1	8	0	1	1	0	0	0	0	0	1	0	0	1	1	1	1	0	0	0	1	0	0	0	0	0
Galr3	8	0	1	1	0	0	0	0	0	1	0	0	1	1	1	1	0	0	0	1	0	0	0	0	0
Dgat1	8	0	1	1	0	0	0	0	0	1	0	0	1	1	1	1	0	0	0	1	0	0	0	0	0
Grap2	8	0	1	1	0	0	0	0	0	1	0	0	1	1	1	1	0	0	0	1	0	0	0	0	0
Bop1	8	0	1	1	0	0	0	0	0	1	0	0	1	1	1	1	0	0	0	1	0	0	0	0	0
Csf2rb2	8	0	1	1	0	0	0	0	0	1	0	0	1	1	1	1	0	0	0	1	0	0	0	0	0
Trank1	8	0	0	0	0	0	0	0	0	1	0	0	1	1	1	1	0	1	1	1	0	0	0	0	0
Slc25a17	8	0	1	1	0	0	0	0	0	1	0	0	1	1	1	1	0	0	0	1	0	0	0	0	0
2020-09-03	8	0	1	1	0	0	0	0	0	1	0	0	1	1	1	1	0	0	0	1	0	0	0	0	0	no
Pacsin2	8	0	1	1	0	0	0	0	0	1	0	0	1	1	1	1	0	0	0	1	0	0	0	0	0
Lynx1	8	0	1	1	0	0	0	0	0	1	0	0	1	1	1	1	0	0	0	1	0	0	0	0	0
Ly6h	8	0	1	1	0	0	0	0	0	1	0	0	1	1	1	1	0	0	0	1	0	0	0	0	0
Foxh1	8	0	1	1	0	0	0	0	0	1	0	0	1	1	1	1	0	0	0	1	0	0	0	0	0
Gcat	8	0	1	1	0	0	0	0	0	1	0	0	1	1	1	1	0	0	0	1	0	0	0	0	0
Polr2f	8	0	1	1	0	0	0	0	0	1	0	0	1	1	1	1	0	0	0	1	0	0	0	0	0
Triobp	8	0	1	1	0	0	0	0	0	1	0	0	1	1	1	1	0	0	0	1	0	0	0	0	0
Rpl8	8	0	1	1	0	0	0	0	0	1	0	0	1	1	1	1	0	0	0	1	0	0	0	0	0
Nup50	8	0	1	1	0	0	0	0	0	1	0	0	1	1	1	1	0	0	0	1	0	0	0	0	0
Rpl3	8	0	1	1	0	0	0	0	0	1	0	0	1	1	1	1	0	0	0	1	0	0	0	0	0
Csnk1e	8	0	1	1	0	0	0	0	0	1	0	0	1	1	1	1	0	0	0	1	0	0	0	0	0
Cspg5	8	0	0	0	0	0	0	0	0	1	0	0	1	1	1	1	0	1	1	1	0	0	0	0	0
Pmm1	8	0	1	1	0	0	0	0	0	1	0	0	1	1	1	1	0	0	0	1	0	0	0	0	0
Prok2	8	0	1	0	0	1	0	0	0	1	1	0	1	0	0	1	0	0	0	0	0	0	1	1	0
Fbxl6	8	0	1	1	0	0	0	0	0	1	0	0	1	1	1	1	0	0	0	1	0	0	0	0	0
Pla2g6	8	0	1	1	0	0	0	0	0	1	0	0	1	1	1	1	0	0	0	1	0	0	0	0	0
Dnal4	8	0	1	1	0	0	0	0	0	1	0	0	1	1	1	1	0	0	0	1	0	0	0	0	0
Cyhr1	8	0	1	1	0	0	0	0	0	1	0	0	1	1	1	1	0	0	0	1	0	0	0	0	0
Nme6	8	0	0	0	0	0	0	0	0	1	0	0	1	1	1	1	0	1	1	1	0	0	0	0	0
Tob2	8	0	1	1	0	0	0	0	0	1	0	0	1	1	1	1	0	0	0	1	0	0	0	0	0
Sult4a1	8	0	1	1	0	0	0	0	0	1	0	0	1	1	1	1	0	0	0	1	0	0	0	0	0
Rbx1	8	0	1	1	0	0	0	0	0	1	0	0	1	1	1	1	0	0	0	1	0	0	0	0	0
Scube1	8	0	1	1	0	0	0	0	0	1	0	0	1	1	1	1	0	0	0	1	0	0	0	0	0
Rybp	8	0	1	0	0	1	0	0	0	1	1	0	1	0	0	1	0	0	0	0	0	0	1	1	0
Txn2	8	0	1	1	0	0	0	0	0	1	0	0	1	1	1	1	0	0	0	1	0	0	0	0	0
Cyp2d22	8	0	1	1	0	0	0	0	0	1	0	0	1	1	1	1	0	0	0	1	0	0	0	0	0
Slc16a8	8	0	1	1	0	0	0	0	0	1	0	0	1	1	1	1	0	0	0	1	0	0	0	0	0
Cdc42ep1	8	0	1	1	0	0	0	0	0	1	0	0	1	1	1	1	0	0	0	1	0	0	0	0	0
Sharpin	8	0	1	1	0	0	0	0	0	1	0	0	1	1	1	1	0	0	0	1	0	0	0	0	0
Tma7	8	0	0	0	0	0	0	0	0	1	0	0	1	1	1	1	0	1	1	1	0	0	0	0	0
Grina	8	0	1	1	0	0	0	0	0	1	0	0	1	1	1	1	0	0	0	1	0	0	0	0	0
Pycrl	8	0	1	1	0	0	0	0	0	1	0	0	1	1	1	1	0	0	0	1	0	0	0	0	0
Arfgap3	8	0	1	1	0	0	0	0	0	1	0	0	1	1	1	1	0	0	0	1	0	0	0	0	0
1700029P11Rik	8	0	1	1	0	0	0	0	0	1	0	0	1	1	1	1	0	0	0	1	0	0	0	0	0
Commd5	8	0	1	1	0	0	0	0	0	1	0	0	1	1	1	1	0	0	0	1	0	0	0	0	0
Cyc1	8	0	1	1	0	0	0	0	0	1	0	0	1	1	1	1	0	0	0	1	0	0	0	0	0
Tab1	8	0	1	1	0	0	0	0	0	1	0	0	1	1	1	1	0	0	0	1	0	0	0	0	0
Rep15	8	1	0	0	1	1	1	0	0	0	0	1	1	0	0	0	0	0	0	0	0	0	1	0	1
Rps19bp1	8	0	1	1	0	0	0	0	0	1	0	0	1	1	1	1	0	0	0	1	0	0	0	0	0
Cenpm	8	0	1	1	0	0	0	0	0	1	0	0	1	1	1	1	0	0	0	1	0	0	0	0	0
Eef1d	8	0	1	1	0	0	0	0	0	1	0	0	1	1	1	1	0	0	0	1	0	0	0	0	0
Ccdc51	8	0	0	0	0	0	0	0	0	1	0	0	1	1	1	1	0	1	1	1	0	0	0	0	0
Dnajb7	8	0	1	1	0	0	0	0	0	1	0	0	1	1	1	1	0	0	0	1	0	0	0	0	0
Eif4e3	8	0	1	0	0	1	0	0	0	1	1	0	1	0	0	1	0	0	0	0	0	0	1	1	0
Vps28	8	0	1	1	0	0	0	0	0	1	0	0	1	1	1	1	0	0	0	1	0	0	0	0	0
Ly6l	8	0	1	1	0	0	0	0	0	1	0	0	1	1	1	1	0	0	0	1	0	0	0	0	0
Gm20696	8	0	1	0	0	1	0	0	0	1	1	0	1	0	0	1	0	0	0	0	0	0	1	1	0	No
Ccdc91	8	1	0	0	1	1	1	0	0	0	0	1	1	0	0	0	0	0	0	0	0	0	1	0	1
2010109I03Rik	8	0	1	1	0	0	0	0	0	1	0	0	1	1	1	1	0	0	0	1	0	0	0	0	0
Ddx17	8	0	1	1	0	0	0	0	0	1	0	0	1	1	1	1	0	0	0	1	0	0	0	0	0
Ift27	8	0	1	1	0	0	0	0	0	1	0	0	1	1	1	1	0	0	0	1	0	0	0	0	0
Ndufa6	8	0	1	1	0	0	0	0	0	1	0	0	1	1	1	1	0	0	0	1	0	0	0	0	0
Nradd	8	0	0	0	0	0	0	0	0	1	0	0	1	1	1	1	0	1	1	1	0	0	0	0	0
Shisa5	8	0	0	0	0	0	0	0	0	1	0	0	1	1	1	1	0	1	1	1	0	0	0	0	0
Puf60	8	0	1	1	0	0	0	0	0	1	0	0	1	1	1	1	0	0	0	1	0	0	0	0	0
Lypd2	8	0	1	1	0	0	0	0	0	1	0	0	1	1	1	1	0	0	0	1	0	0	0	0	0
Gpihbp1	8	0	1	1	0	0	0	0	0	1	0	0	1	1	1	1	0	0	0	1	0	0	0	0	0
Samm50	8	0	1	1	0	0	0	0	0	1	0	0	1	1	1	1	0	0	0	1	0	0	0	0	0
Maf1	8	0	1	1	0	0	0	0	0	1	0	0	1	1	1	1	0	0	0	1	0	0	0	0	0
Zfp707	8	0	1	1	0	0	0	0	0	1	0	0	1	1	1	1	0	0	0	1	0	0	0	0	0
Smdt1	8	0	1	1	0	0	0	0	0	1	0	0	1	1	1	1	0	0	0	1	0	0	0	0	0
Sgsm3	8	0	1	1	0	0	0	0	0	1	0	0	1	1	1	1	0	0	0	1	0	0	0	0	0
Gsdmd	8	0	1	1	0	0	0	0	0	1	0	0	1	1	1	1	0	0	0	1	0	0	0	0	0
Mroh4	8	0	1	1	0	0	0	0	0	1	0	0	1	1	1	1	0	0	0	1	0	0	0	0	0
Slurp2	8	0	1	1	0	0	0	0	0	1	0	0	1	1	1	1	0	0	0	1	0	0	0	0	0
Mfsd3	8	0	1	1	0	0	0	0	0	1	0	0	1	1	1	1	0	0	0	1	0	0	0	0	0
Col22a1	8	0	1	1	0	0	0	0	0	1	0	0	1	1	1	1	0	0	0	1	0	0	0	0	0
St13	8	0	1	1	0	0	0	0	0	1	0	0	1	1	1	1	0	0	0	1	0	0	0	0	0
Fam135b	8	0	1	1	0	0	0	0	0	1	0	0	1	1	1	1	0	0	0	1	0	0	0	0	0
Setd2	8	0	0	0	0	0	0	0	0	1	0	0	1	1	1	1	0	1	1	1	0	0	0	0	0
Lrrfip2	8	0	0	0	0	0	0	0	0	1	0	0	1	1	1	1	0	1	1	1	0	0	0	0	0
Parp10	8	0	1	1	0	0	0	0	0	1	0	0	1	1	1	1	0	0	0	1	0	0	0	0	0
Zfp251	8	0	1	1	0	0	0	0	0	1	0	0	1	1	1	1	0	0	0	1	0	0	0	0	0
Tmprss6	8	0	1	1	0	0	0	0	0	1	0	0	1	1	1	1	0	0	0	1	0	0	0	0	0
Cyp2d40	8	0	1	1	0	0	0	0	0	1	0	0	1	1	1	1	0	0	0	1	0	0	0	0	0
Apol6	8	0	1	1	0	0	0	0	0	1	0	0	1	1	1	1	0	0	0	1	0	0	0	0	0
Slc39a4	8	0	1	1	0	0	0	0	0	1	0	0	1	1	1	1	0	0	0	1	0	0	0	0	0
Pdxp	8	0	1	1	0	0	0	0	0	1	0	0	1	1	1	1	0	0	0	1	0	0	0	0	0
Tnfrsf13c	8	0	1	1	0	0	0	0	0	1	0	0	1	1	1	1	0	0	0	1	0	0	0	0	0
Elp6	8	0	0	0	0	0	0	0	0	1	0	0	1	1	1	1	0	1	1	1	0	0	0	0	0
Shq1	8	0	1	0	0	1	0	0	0	1	1	0	1	0	0	1	0	0	0	0	0	0	1	1	0
Shisal1	8	0	1	1	0	0	0	0	0	1	0	0	1	1	1	1	0	0	0	1	0	0	0	0	0
Psca	8	0	1	1	0	0	0	0	0	1	0	0	1	1	1	1	0	0	0	1	0	0	0	0	0
Ccdc12	8	0	0	0	0	0	0	0	0	1	0	0	1	1	1	1	0	1	1	1	0	0	0	0	0
C1qtnf6	8	0	1	1	0	0	0	0	0	1	0	0	1	1	1	1	0	0	0	1	0	0	0	0	0
Tonsl	8	0	1	1	0	0	0	0	0	1	0	0	1	1	1	1	0	0	0	1	0	0	0	0	0
Dhx30	8	0	0	0	0	0	0	0	0	1	0	0	1	1	1	1	0	1	1	1	0	0	0	0	0
Kctd17	8	0	1	1	0	0	0	0	0	1	0	0	1	1	1	1	0	0	0	1	0	0	0	0	0
Top1mt	8	0	1	1	0	0	0	0	0	1	0	0	1	1	1	1	0	0	0	1	0	0	0	0	0
Ppp1r16a	8	0	1	1	0	0	0	0	0	1	0	0	1	1	1	1	0	0	0	1	0	0	0	0	0
Arhgap8	8	0	1	1	0	0	0	0	0	1	0	0	1	1	1	1	0	0	0	1	0	0	0	0	0
Fam118a	8	0	1	1	0	0	0	0	0	1	0	0	1	1	1	1	0	0	0	1	0	0	0	0	0
Prss44	8	0	0	0	0	0	0	0	0	1	0	0	1	1	1	1	0	1	1	1	0	0	0	0	0
Tex33	8	0	1	1	0	0	0	0	0	1	0	0	1	1	1	1	0	0	0	1	0	0	0	0	0
1700088E04Rik	8	0	1	1	0	0	0	0	0	1	0	0	1	1	1	1	0	0	0	1	0	0	0	0	0
Tssk5	8	0	1	1	0	0	0	0	0	1	0	0	1	1	1	1	0	0	0	1	0	0	0	0	0
Ccrl2	8	0	0	0	0	0	0	0	0	1	0	0	1	1	1	1	0	1	1	1	0	0	0	0	0
Cby1	8	0	1	1	0	0	0	0	0	1	0	0	1	1	1	1	0	0	0	1	0	0	0	0	0
Poldip3	8	0	1	1	0	0	0	0	0	1	0	0	1	1	1	1	0	0	0	1	0	0	0	0	0
Mroh6	8	0	1	1	0	0	0	0	0	1	0	0	1	1	1	1	0	0	0	1	0	0	0	0	0
Nfam1	8	0	1	1	0	0	0	0	0	1	0	0	1	1	1	1	0	0	0	1	0	0	0	0	0
Josd1	8	0	1	1	0	0	0	0	0	1	0	0	1	1	1	1	0	0	0	1	0	0	0	0	0
Lrrc2	8	0	0	0	0	0	0	0	0	1	0	0	1	1	1	1	0	1	1	1	0	0	0	0	0
Spatc1	8	0	1	1	0	0	0	0	0	1	0	0	1	1	1	1	0	0	0	1	0	0	0	0	0
Prss46	8	0	0	0	0	0	0	0	0	1	0	0	1	1	1	1	0	1	1	1	0	0	0	0	0
Wbp2nl	8	0	1	1	0	0	0	0	0	1	0	0	1	1	1	1	0	0	0	1	0	0	0	0	0
Rrp7a	8	0	1	1	0	0	0	0	0	1	0	0	1	1	1	1	0	0	0	1	0	0	0	0	0
Oplah	8	0	1	1	0	0	0	0	0	1	0	0	1	1	1	1	0	0	0	1	0	0	0	0	0
Fam227a	8	0	1	1	0	0	0	0	0	1	0	0	1	1	1	1	0	0	0	1	0	0	0	0	0
Apol7a	8	0	1	1	0	0	0	0	0	1	0	0	1	1	1	1	0	0	0	1	0	0	0	0	0
Pnpla5	8	0	1	1	0	0	0	0	0	1	0	0	1	1	1	1	0	0	0	1	0	0	0	0	0
Cyp2d26	8	0	1	1	0	0	0	0	0	1	0	0	1	1	1	1	0	0	0	1	0	0	0	0	0
Exosc4	8	0	1	1	0	0	0	0	0	1	0	0	1	1	1	1	0	0	0	1	0	0	0	0	0
1700025B11Rik	8	0	1	1	0	0	0	0	0	1	0	0	1	1	1	1	0	0	0	1	0	0	0	0	0
Ccdc134	8	0	1	1	0	0	0	0	0	1	0	0	1	1	1	1	0	0	0	1	0	0	0	0	0
Ly6k	8	0	1	1	0	0	0	0	0	1	0	0	1	1	1	1	0	0	0	1	0	0	0	0	0
1500009C09Rik	8	0	1	1	0	0	0	0	0	1	0	0	1	1	1	1	0	0	0	1	0	0	0	0	0
Trappc9	8	0	1	1	0	0	0	0	0	1	0	0	1	1	1	1	0	0	0	1	0	0	0	0	0
Prr5	8	0	1	1	0	0	0	0	0	1	0	0	1	1	1	1	0	0	0	1	0	0	0	0	0
Efcab6	8	0	1	1	0	0	0	0	0	1	0	0	1	1	1	1	0	0	0	1	0	0	0	0	0
Epm2aip1	8	0	0	0	0	0	0	0	0	1	0	0	1	1	1	1	0	1	1	1	0	0	0	0	0
Them6	8	0	1	1	0	0	0	0	0	1	0	0	1	1	1	1	0	0	0	1	0	0	0	0	0
Atrip	8	0	0	0	0	0	0	0	0	1	0	0	1	1	1	1	0	1	1	1	0	0	0	0	0
Ccdc166	8	0	1	1	0	0	0	0	0	1	0	0	1	1	1	1	0	0	0	1	0	0	0	0	0
C030006K11Rik	8	0	1	1	0	0	0	0	0	1	0	0	1	1	1	1	0	0	0	1	0	0	0	0	0
Spink8	8	0	0	0	0	0	0	0	0	1	0	0	1	1	1	1	0	1	1	1	0	0	0	0	0
D730001G18Rik	8	0	1	1	0	0	0	0	0	1	0	0	1	1	1	1	0	0	0	1	0	0	0	0	0
Zfp623	8	0	1	1	0	0	0	0	0	1	0	0	1	1	1	1	0	0	0	1	0	0	0	0	0
Polr3h	8	0	1	1	0	0	0	0	0	1	0	0	1	1	1	1	0	0	0	1	0	0	0	0	0
Slurp1	8	0	1	1	0	0	0	0	0	1	0	0	1	1	1	1	0	0	0	1	0	0	0	0	0
Recql4	8	0	1	1	0	0	0	0	0	1	0	0	1	1	1	1	0	0	0	1	0	0	0	0	0
Apobec3	8	0	1	1	0	0	0	0	0	1	0	0	1	1	1	1	0	0	0	1	0	0	0	0	0
Pdzrn3	8	0	1	0	0	1	0	0	0	1	1	0	1	0	0	1	0	0	0	0	0	0	1	1	0
Eif3d	8	0	1	1	0	0	0	0	0	1	0	0	1	1	1	1	0	0	0	1	0	0	0	0	0
Rbfox2	8	0	1	1	0	0	0	0	0	1	0	0	1	1	1	1	0	0	0	1	0	0	0	0	0
Serhl	8	0	1	1	0	0	0	0	0	1	0	0	1	1	1	1	0	0	0	1	0	0	0	0	0
Chrac1	8	0	1	1	0	0	0	0	0	1	0	0	1	1	1	1	0	0	0	1	0	0	0	0	0
Adgrb1	8	0	1	1	0	0	0	0	0	1	0	0	1	1	1	1	0	0	0	1	0	0	0	0	0
Scap	8	0	0	0	0	0	0	0	0	1	0	0	1	1	1	1	0	1	1	1	0	0	0	0	0
Klhl18	8	0	0	0	0	0	0	0	0	1	0	0	1	1	1	1	0	1	1	1	0	0	0	0	0
Ptpn23	8	0	0	0	0	0	0	0	0	1	0	0	1	1	1	1	0	1	1	1	0	0	0	0	0
Fam83h	8	0	1	1	0	0	0	0	0	1	0	0	1	1	1	1	0	0	0	1	0	0	0	0	0
Tigd5	8	0	1	1	0	0	0	0	0	1	0	0	1	1	1	1	0	0	0	1	0	0	0	0	0
Scrib	8	0	1	1	0	0	0	0	0	1	0	0	1	1	1	1	0	0	0	1	0	0	0	0	0
Kdelr3	8	0	1	1	0	0	0	0	0	1	0	0	1	1	1	1	0	0	0	1	0	0	0	0	0
Dennd3	8	0	1	1	0	0	0	0	0	1	0	0	1	1	1	1	0	0	0	1	0	0	0	0	0
Card10	8	0	1	1	0	0	0	0	0	1	0	0	1	1	1	1	0	0	0	1	0	0	0	0	0
Mief1	8	0	1	1	0	0	0	0	0	1	0	0	1	1	1	1	0	0	0	1	0	0	0	0	0
Csdc2	8	0	1	1	0	0	0	0	0	1	0	0	1	1	1	1	0	0	0	1	0	0	0	0	0
Shisa8	8	0	1	1	0	0	0	0	0	1	0	0	1	1	1	1	0	0	0	1	0	0	0	0	0
Gga1	8	0	1	1	0	0	0	0	0	1	0	0	1	1	1	1	0	0	0	1	0	0	0	0	0
Slc45a4	8	0	1	1	0	0	0	0	0	1	0	0	1	1	1	1	0	0	0	1	0	0	0	0	0
Nol12	8	0	1	1	0	0	0	0	0	1	0	0	1	1	1	1	0	0	0	1	0	0	0	0	0
Hgh1	8	0	1	1	0	0	0	0	0	1	0	0	1	1	1	1	0	0	0	1	0	0	0	0	0
Pnpla3	8	0	1	1	0	0	0	0	0	1	0	0	1	1	1	1	0	0	0	1	0	0	0	0	0
1110038F14Rik	8	0	1	1	0	0	0	0	0	1	0	0	1	1	1	1	0	0	0	1	0	0	0	0	0
Smc1b	8	0	1	1	0	0	0	0	0	1	0	0	1	1	1	1	0	0	0	1	0	0	0	0	0
Plxnb1	8	0	0	0	0	0	0	0	0	1	0	0	1	1	1	1	0	1	1	1	0	0	0	0	0
Parvg	8	0	1	1	0	0	0	0	0	1	0	0	1	1	1	1	0	0	0	1	0	0	0	0	0
Parvb	8	0	1	1	0	0	0	0	0	1	0	0	1	1	1	1	0	0	0	1	0	0	0	0	0
Ucn2	8	0	0	0	0	0	0	0	0	1	0	0	1	1	1	1	0	1	1	1	0	0	0	0	0
Scrt1	8	0	1	1	0	0	0	0	0	1	0	0	1	1	1	1	0	0	0	1	0	0	0	0	0
Cacna1i	8	0	1	1	0	0	0	0	0	1	0	0	1	1	1	1	0	0	0	1	0	0	0	0	0
Mpst	8	0	1	1	0	0	0	0	0	1	0	0	1	1	1	1	0	0	0	1	0	0	0	0	0
Mchr1	8	0	1	1	0	0	0	0	0	1	0	0	1	1	1	1	0	0	0	1	0	0	0	0	0
Tmie	8	0	0	0	0	0	0	0	0	1	0	0	1	1	1	1	0	1	1	1	0	0	0	0	0
Mkl1	8	0	1	1	0	0	0	0	0	1	0	0	1	1	1	1	0	0	0	1	0	0	0	0	0
Eif3l	8	0	1	1	0	0	0	0	0	1	0	0	1	1	1	1	0	0	0	1	0	0	0	0	0
Phf5a	8	0	1	1	0	0	0	0	0	1	0	0	1	1	1	1	0	0	0	1	0	0	0	0	0
Ago2	8	0	1	1	0	0	0	0	0	1	0	0	1	1	1	1	0	0	0	1	0	0	0	0	0
Rtp3	8	0	0	0	0	0	0	0	0	1	0	0	1	1	1	1	0	1	1	1	0	0	0	0	0
Prss50	8	0	0	0	0	0	0	0	0	1	0	0	1	1	1	1	0	1	1	1	0	0	0	0	0
Als2cl	8	0	0	0	0	0	0	0	0	1	0	0	1	1	1	1	0	1	1	1	0	0	0	0	0
Cyth4	8	0	1	1	0	0	0	0	0	1	0	0	1	1	1	1	0	0	0	1	0	0	0	0	0
Gpr20	8	0	1	1	0	0	0	0	0	1	0	0	1	1	1	1	0	0	0	1	0	0	0	0	0
Mroh1	8	0	1	1	0	0	0	0	0	1	0	0	1	1	1	1	0	0	0	1	0	0	0	0	0
BC024139	8	0	1	1	0	0	0	0	0	1	0	0	1	1	1	1	0	0	0	1	0	0	0	0	0
Naprt	8	0	1	1	0	0	0	0	0	1	0	0	1	1	1	1	0	0	0	1	0	0	0	0	0
Sun2	8	0	1	1	0	0	0	0	0	1	0	0	1	1	1	1	0	0	0	1	0	0	0	0	0
Ttll1	8	0	1	1	0	0	0	0	0	1	0	0	1	1	1	1	0	0	0	1	0	0	0	0	0
L3mbtl2	8	0	1	1	0	0	0	0	0	1	0	0	1	1	1	1	0	0	0	1	0	0	0	0	0
Pheta2	8	0	1	1	0	0	0	0	0	1	0	0	1	1	1	1	0	0	0	1	0	0	0	0	0
Tnrc6b	8	0	1	1	0	0	0	0	0	1	0	0	1	1	1	1	0	0	0	1	0	0	0	0	0
Phf21b	8	0	1	1	0	0	0	0	0	1	0	0	1	1	1	1	0	0	0	1	0	0	0	0	0
Ankrd54	8	0	1	1	0	0	0	0	0	1	0	0	1	1	1	1	0	0	0	1	0	0	0	0	0
Gm35339	8	0	1	1	0	0	0	0	0	1	0	0	1	1	1	1	0	0	0	1	0	0	0	0	0	No
Klhl42	8	1	0	0	1	1	1	0	0	0	0	1	1	0	0	0	0	0	0	0	0	0	1	0	1
5031439G07Rik	8	0	1	1	0	0	0	0	0	1	0	0	1	1	1	1	0	0	0	1	0	0	0	0	0
Apol8	8	0	1	1	0	0	0	0	0	1	0	0	1	1	1	1	0	0	0	1	0	0	0	0	0
Lrrc14	8	0	1	1	0	0	0	0	0	1	0	0	1	1	1	1	0	0	0	1	0	0	0	0	0
Tmem184b	8	0	1	1	0	0	0	0	0	1	0	0	1	1	1	1	0	0	0	1	0	0	0	0	0
Xpnpep3	8	0	1	1	0	0	0	0	0	1	0	0	1	1	1	1	0	0	0	1	0	0	0	0	0
Tomm22	8	0	1	1	0	0	0	0	0	1	0	0	1	1	1	1	0	0	0	1	0	0	0	0	0
Mrps35	8	1	0	0	1	1	1	0	0	0	0	1	1	0	0	0	0	0	0	0	0	0	1	0	1
Nbeal2	8	0	0	0	0	0	0	0	0	1	0	0	1	1	1	1	0	1	1	1	0	0	0	0	0
Zc3h3	8	0	1	1	0	0	0	0	0	1	0	0	1	1	1	1	0	0	0	1	0	0	0	0	0
Baiap2l2	8	0	1	1	0	0	0	0	0	1	0	0	1	1	1	1	0	0	0	1	0	0	0	0	0
Mcat	8	0	1	1	0	0	0	0	0	1	0	0	1	1	1	1	0	0	0	1	0	0	0	0	0
Prss42	8	0	0	0	0	0	0	0	0	1	0	0	1	1	1	1	0	1	1	1	0	0	0	0	0
Mapk15	8	0	1	1	0	0	0	0	0	1	0	0	1	1	1	1	0	0	0	1	0	0	0	0	0
Nrbp2	8	0	1	1	0	0	0	0	0	1	0	0	1	1	1	1	0	0	0	1	0	0	0	0	0
Mafa	8	0	1	1	0	0	0	0	0	1	0	0	1	1	1	1	0	0	0	1	0	0	0	0	0
Eppk1	8	0	1	1	0	0	0	0	0	1	0	0	1	1	1	1	0	0	0	1	0	0	0	0	0
Rtl6	8	0	1	1	0	0	0	0	0	1	0	0	1	1	1	1	0	0	0	1	0	0	0	0	0
BC025446	8	0	1	1	0	0	0	0	0	1	0	0	1	1	1	1	0	0	0	1	0	0	0	0	0
Adck5	8	0	1	1	0	0	0	0	0	1	0	0	1	1	1	1	0	0	0	1	0	0	0	0	0
Cpsf1	8	0	1	1	0	0	0	0	0	1	0	0	1	1	1	1	0	0	0	1	0	0	0	0	0
Gxylt2	8	0	1	0	0	1	0	0	0	1	1	0	1	0	0	1	0	0	0	0	0	0	1	1	0
Prss43	8	0	0	0	0	0	0	0	0	1	0	0	1	1	1	1	0	1	1	1	0	0	0	0	0
Pfkfb4	8	0	0	0	0	0	0	0	0	1	0	0	1	1	1	1	0	1	1	1	0	0	0	0	0
Fam240a	8	0	0	0	0	0	0	0	0	1	0	0	1	1	1	1	0	1	1	1	0	0	0	0	0
Mroh5	8	0	1	1	0	0	0	0	0	1	0	0	1	1	1	1	0	0	0	1	0	0	0	0	0
4930407I10Rik	8	0	1	1	0	0	0	0	0	1	0	0	1	1	1	1	0	0	0	1	0	0	0	0	0
Enthd1	8	0	1	1	0	0	0	0	0	1	0	0	1	1	1	1	0	0	0	1	0	0	0	0	0
Ppp4r2	8	0	1	0	0	1	0	0	0	1	1	0	1	0	0	1	0	0	0	0	0	0	1	1	0
Mei1	8	0	1	1	0	0	0	0	0	1	0	0	1	1	1	1	0	0	0	1	0	0	0	0	0
Chadl	8	0	1	1	0	0	0	0	0	1	0	0	1	1	1	1	0	0	0	1	0	0	0	0	0
Ttll12	8	0	1	1	0	0	0	0	0	1	0	0	1	1	1	1	0	0	0	1	0	0	0	0	0
Dclk3	8	0	0	0	0	0	0	0	0	1	0	0	1	1	1	1	0	1	1	1	0	0	0	0	0
Apol10b	8	0	1	1	0	0	0	0	0	1	0	0	1	1	1	1	0	0	0	1	0	0	0	0	0
Cyp2d34	8	0	1	1	0	0	0	0	0	1	0	0	1	1	1	1	0	0	0	1	0	0	0	0	0
Zfp647	8	0	1	1	0	0	0	0	0	1	0	0	1	1	1	1	0	0	0	1	0	0	0	0	0
A4galt	8	0	1	1	0	0	0	0	0	1	0	0	1	1	1	1	0	0	0	1	0	0	0	0	0
Cbx6	8	0	1	1	0	0	0	0	0	1	0	0	1	1	1	1	0	0	0	1	0	0	0	0	0
Kcnk9	8	0	1	1	0	0	0	0	0	1	0	0	1	1	1	1	0	0	0	1	0	0	0	0	0
K230010J24Rik	8	0	1	1	0	0	0	0	0	1	0	0	1	1	1	1	0	0	0	1	0	0	0	0	0
Fbxw25	8	0	0	0	0	0	0	0	0	1	0	0	1	1	1	1	0	1	1	1	0	0	0	0	0
Lrrc24	8	0	1	1	0	0	0	0	0	1	0	0	1	1	1	1	0	0	0	1	0	0	0	0	0
Prss45	8	0	0	0	0	0	0	0	0	1	0	0	1	1	1	1	0	1	1	1	0	0	0	0	0
Apol9a	8	0	1	1	0	0	0	0	0	1	0	0	1	1	1	1	0	0	0	1	0	0	0	0	0
Elfn2	8	0	1	1	0	0	0	0	0	1	0	0	1	1	1	1	0	0	0	1	0	0	0	0	0
Mir33	8	0	1	1	0	0	0	0	0	1	0	0	1	1	1	1	0	0	0	1	0	0	0	0	0
Gml	8	0	1	1	0	0	0	0	0	1	0	0	1	1	1	1	0	0	0	1	0	0	0	0	0
Mansc4	8	1	0	0	1	1	1	0	0	0	0	1	1	0	0	0	0	0	0	0	0	0	1	0	1
Gm36245	8	0	1	1	0	0	0	0	0	1	0	0	1	1	1	1	0	0	0	1	0	0	0	0	0	No
Fbxw24	8	0	0	0	0	0	0	0	0	1	0	0	1	1	1	1	0	1	1	1	0	0	0	0	0
Gm6569	8	0	1	1	0	0	0	0	0	1	0	0	1	1	1	1	0	0	0	1	0	0	0	0	0	No
Acvr2b	7	0	0	0	0	0	0	0	0	1	0	0	1	1	1	1	0	1	0	1	0	0	0	0	0
Glb1	7	0	0	0	0	0	0	0	0	1	0	0	1	1	1	1	0	1	0	1	0	0	0	0	0
Mecom	7	0	0	0	1	1	0	0	0	1	0	0	0	1	0	0	0	1	0	0	0	0	1	0	1
Fbln2	7	0	1	0	0	0	0	0	0	1	1	0	1	1	0	1	0	0	0	0	0	0	0	1	0
Rps27rt	7	0	0	0	0	0	0	0	0	1	0	0	1	1	1	1	0	1	0	1	0	0	0	0	0
Plcd1	7	0	0	0	0	0	0	0	0	1	0	0	1	1	1	1	0	1	0	1	0	0	0	0	0
Scn5a	7	0	0	0	0	0	0	0	0	1	0	0	1	1	1	1	0	1	0	1	0	0	0	0	0
Slc6a6	7	0	1	0	0	0	0	0	0	1	1	0	1	1	0	1	0	0	0	0	0	0	0	1	0
Tgfbr2	7	0	0	0	0	0	0	0	0	1	0	0	1	1	1	1	0	1	0	1	0	0	0	0	0
Trh	7	0	1	0	0	0	0	0	0	1	1	0	1	1	0	1	0	0	0	0	0	0	0	1	0
Wnt7a	7	0	1	0	0	0	0	0	0	1	1	0	1	1	0	1	0	0	0	0	0	0	0	1	0
Prkci	7	0	0	0	1	1	0	0	0	1	0	0	0	1	0	0	0	1	0	0	0	0	1	0	1
Spr	7	0	0	0	1	1	0	1	0	0	0	1	0	0	0	0	0	1	0	0	0	0	1	0	1
Itga9	7	0	0	0	0	0	0	0	0	1	0	0	1	1	1	1	0	1	0	1	0	0	0	0	0
Ubp1	7	0	0	0	0	0	0	0	0	1	0	0	1	1	1	1	0	1	0	1	0	0	0	0	0
Skil	7	0	0	0	1	1	0	0	0	1	0	0	0	1	0	0	0	1	0	0	0	0	1	0	1
Cldn11	7	0	0	0	1	1	0	0	0	1	0	0	0	1	0	0	0	1	0	0	0	0	1	0	1
Arpp21	7	0	0	0	0	0	0	0	0	1	0	0	1	1	1	1	0	1	0	1	0	0	0	0	0
Ccr4	7	0	0	0	0	0	0	0	0	1	0	0	1	1	1	1	0	1	0	1	0	0	0	0	0
Lrig1	7	0	1	0	0	0	0	0	0	1	1	0	1	1	0	1	0	0	0	0	0	0	0	1	0
Myd88	7	0	0	0	0	0	0	0	0	1	0	0	1	1	1	1	0	1	0	1	0	0	0	0	0
Scn10a	7	0	0	0	0	0	0	0	0	1	0	0	1	1	1	1	0	1	0	1	0	0	0	0	0
Tmsb10	7	1	0	0	1	1	0	0	0	0	0	1	0	0	0	0	0	1	0	0	0	0	1	0	1
Chl1	7	0	1	0	0	1	0	0	0	1	0	0	1	0	0	1	0	0	0	0	0	0	1	1	0
Eomes	7	0	0	0	0	0	0	0	0	1	0	0	1	1	1	1	0	1	0	1	0	0	0	0	0
Vill	7	0	0	0	0	0	0	0	0	1	0	0	1	1	1	1	0	1	0	1	0	0	0	0	0
Tcf7l1	7	1	0	0	1	1	0	0	0	0	0	1	0	0	0	0	0	1	0	0	0	0	1	0	1
Magi1	7	0	1	0	0	0	0	0	0	1	1	0	1	1	0	1	0	0	0	0	0	0	0	1	0
Bcl2a1c	7	0	0	0	0	0	0	0	0	1	0	0	1	1	1	1	0	1	0	1	0	0	0	0	0
Gpd1l	7	0	0	0	0	0	0	0	0	1	0	0	1	1	1	1	0	1	0	1	0	0	0	0	0
Suclg2	7	0	1	0	0	0	0	0	0	1	1	0	1	1	0	1	0	0	0	0	0	0	0	1	0
Khdrbs3	7	0	1	0	0	0	0	0	0	1	0	0	1	1	1	1	0	0	0	1	0	0	0	0	0
Pdcd6ip	7	0	0	0	0	0	0	0	0	1	0	0	1	1	1	1	0	1	0	1	0	0	0	0	0
Scn11a	7	0	0	0	0	0	0	0	0	1	0	0	1	1	1	1	0	1	0	1	0	0	0	0	0
Dysf	7	0	0	0	1	1	0	1	0	0	0	1	0	0	0	0	0	1	0	0	0	0	1	0	1
Azi2	7	0	0	0	0	0	0	0	0	1	0	0	1	1	1	1	0	1	0	1	0	0	0	0	0
Nr2c2	7	0	1	0	0	0	0	0	0	1	1	0	1	1	0	1	0	0	0	0	0	0	0	1	0
Cntn6	7	0	1	0	0	1	0	0	0	1	0	0	1	0	0	1	0	0	0	0	0	0	1	1	0
Golga4	7	0	0	0	0	0	0	0	0	1	0	0	1	1	1	1	0	1	0	1	0	0	0	0	0
Tmppe	7	0	0	0	0	0	0	0	0	1	0	0	1	1	1	1	0	1	0	1	0	0	0	0	0
Crtap	7	0	0	0	0	0	0	0	0	1	0	0	1	1	1	1	0	1	0	1	0	0	0	0	0
Mrps25	7	0	1	0	0	0	0	0	0	1	1	0	1	1	0	1	0	0	0	0	0	0	0	1	0
Isoc1	7	0	0	1	0	0	0	0	0	1	1	0	1	0	0	0	1	0	0	0	0	1	0	1	0
Slc25a26	7	0	1	0	0	0	0	0	0	1	1	0	1	1	0	1	0	0	0	0	0	0	0	1	0
Lsm3	7	0	1	0	0	0	0	0	0	1	1	0	1	1	0	1	0	0	0	0	0	0	0	1	0
Cmc1	7	0	0	0	0	0	0	0	0	1	0	0	1	1	1	1	0	1	0	1	0	0	0	0	0
Stt3b	7	0	0	0	0	0	0	0	0	1	0	0	1	1	1	1	0	1	0	1	0	0	0	0	0
Lrriq4	7	0	0	0	1	1	0	0	0	1	0	0	0	1	0	0	0	1	0	0	0	0	1	0	1
Adamts9	7	0	1	0	0	0	0	0	0	1	1	0	1	1	0	1	0	0	0	0	0	0	0	1	0
Ctdspl	7	0	0	0	0	0	0	0	0	1	0	0	1	1	1	1	0	1	0	1	0	0	0	0	0
Sec62	7	0	0	0	1	1	0	0	0	1	0	0	0	1	0	0	0	1	0	0	0	0	1	0	1
Oxsr1	7	0	0	0	0	0	0	0	0	1	0	0	1	1	1	1	0	1	0	1	0	0	0	0	0
Lrrc34	7	0	0	0	1	1	0	0	0	1	0	0	0	1	0	0	0	1	0	0	0	0	1	0	1
Gpr160	7	0	0	0	1	1	0	0	0	1	0	0	0	1	0	0	0	1	0	0	0	0	1	0	1
Chchd4	7	0	1	0	0	0	0	0	0	1	1	0	1	1	0	1	0	0	0	0	0	0	0	1	0
Fbxl2	7	0	0	0	0	0	0	0	0	1	0	0	1	1	1	1	0	1	0	1	0	0	0	0	0
Kcnmb2	7	0	0	0	1	1	0	0	0	1	0	0	0	1	0	0	0	1	0	0	0	0	1	0	1
Gadl1	7	0	0	0	0	0	0	0	0	1	0	0	1	1	1	1	0	1	0	1	0	0	0	0	0
Tmem43	7	0	1	0	0	0	0	0	0	1	1	0	1	1	0	1	0	0	0	0	0	0	0	1	0
Kcmf1	7	1	0	0	1	1	0	0	0	0	0	1	0	0	0	0	0	1	0	0	0	0	1	0	1
Osbpl10	7	0	0	0	0	0	0	0	0	1	0	0	1	1	1	1	0	1	0	1	0	0	0	0	0
A730049H05Rik	7	0	1	0	0	0	0	0	0	1	1	0	1	1	0	1	0	0	0	0	0	0	0	1	0
Zcwpw2	7	0	0	0	0	0	0	0	0	1	0	0	1	1	1	1	0	1	0	1	0	0	0	0	0
Exoc6b	7	0	0	0	1	1	0	1	0	0	0	1	0	0	0	0	0	1	0	0	0	0	1	0	1
Samd7	7	0	0	0	1	1	0	0	0	1	0	0	0	1	0	0	0	1	0	0	0	0	1	0	1
Actrt3	7	0	0	0	1	1	0	0	0	1	0	0	0	1	0	0	0	1	0	0	0	0	1	0	1
Prickle2	7	0	1	0	0	0	0	0	0	1	1	0	1	1	0	1	0	0	0	0	0	0	0	1	0
Xpc	7	0	1	0	0	0	0	0	0	1	1	0	1	1	0	1	0	0	0	0	0	0	0	1	0
Rbsn	7	0	1	0	0	0	0	0	0	1	1	0	1	1	0	1	0	0	0	0	0	0	0	1	0
1700123L14Rik	7	0	1	0	0	0	0	0	0	1	1	0	1	1	0	1	0	0	0	0	0	0	0	1	0
Cnot10	7	0	0	0	0	0	0	0	0	1	0	0	1	1	1	1	0	1	0	1	0	0	0	0	0
Chsy3	7	0	0	1	0	0	0	0	0	1	1	0	1	0	0	0	1	0	0	0	0	1	0	1	0
Mynn	7	0	0	0	1	1	0	0	0	1	0	0	0	1	0	0	0	1	0	0	0	0	1	0	1
Dync1li1	7	0	0	0	0	0	0	0	0	1	0	0	1	1	1	1	0	1	0	1	0	0	0	0	0
Xylb	7	0	0	0	0	0	0	0	0	1	0	0	1	1	1	1	0	1	0	1	0	0	0	0	0
Slc22a13	7	0	0	0	0	0	0	0	0	1	0	0	1	1	1	1	0	1	0	1	0	0	0	0	0
Exog	7	0	0	0	0	0	0	0	0	1	0	0	1	1	1	1	0	1	0	1	0	0	0	0	0
Acaa1a	7	0	0	0	0	0	0	0	0	1	0	0	1	1	1	1	0	1	0	1	0	0	0	0	0
Cyp26b1	7	0	0	0	1	1	0	1	0	0	0	1	0	0	0	0	0	1	0	0	0	0	1	0	1
Adamts19	7	0	0	1	0	0	0	0	0	1	1	0	1	0	0	0	1	0	0	0	0	1	0	1	0
Minar2	7	0	0	1	0	0	0	0	0	1	1	0	1	0	0	0	1	0	0	0	0	1	0	1	0
Fgd5	7	0	1	0	0	0	0	0	0	1	1	0	1	1	0	1	0	0	0	0	0	0	0	1	0
Dlec1	7	0	0	0	0	0	0	0	0	1	0	0	1	1	1	1	0	1	0	1	0	0	0	0	0
Fam19a1	7	0	1	0	0	0	0	0	0	1	1	0	1	1	0	1	0	0	0	0	0	0	0	1	0
Lrrc31	7	0	0	0	1	1	0	0	0	1	0	0	0	1	0	0	0	1	0	0	0	0	1	0	1
Rbms3	7	0	0	0	0	0	0	0	0	1	0	0	1	1	1	1	0	1	0	1	0	0	0	0	0
Ccdc174	7	0	1	0	0	0	0	0	0	1	1	0	1	1	0	1	0	0	0	0	0	0	0	1	0
Phc3	7	0	0	0	1	1	0	0	0	1	0	0	0	1	0	0	0	1	0	0	0	0	1	0	1
Kbtbd8	7	0	1	0	0	0	0	0	0	1	1	0	1	1	0	1	0	0	0	0	0	0	0	1	0
Cmtm6	7	0	0	0	0	0	0	0	0	1	0	0	1	1	1	1	0	1	0	1	0	0	0	0	0
Cmtm7	7	0	0	0	0	0	0	0	0	1	0	0	1	1	1	1	0	1	0	1	0	0	0	0	0
Cmtm8	7	0	0	0	0	0	0	0	0	1	0	0	1	1	1	1	0	1	0	1	0	0	0	0	0
Mir26a-1	7	0	0	0	0	0	0	0	0	1	0	0	1	1	1	1	0	1	0	1	0	0	0	0	0
4930590J08Rik	7	0	1	0	0	0	0	0	0	1	1	0	1	1	0	1	0	0	0	0	0	0	0	1	0
Susd5	7	0	0	0	0	0	0	0	0	1	0	0	1	1	1	1	0	1	0	1	0	0	0	0	0
Trim71	7	0	0	0	0	0	0	0	0	1	0	0	1	1	1	1	0	1	0	1	0	0	0	0	0
Slc22a14	7	0	0	0	0	0	0	0	0	1	0	0	1	1	1	1	0	1	0	1	0	0	0	0	0
Grip2	7	0	1	0	0	0	0	0	0	1	1	0	1	1	0	1	0	0	0	0	0	0	0	1	0
Slc27a6	7	0	0	1	0	0	0	0	0	1	1	0	1	0	0	0	1	0	0	0	0	1	0	1	0
Slc7a14	7	0	0	0	1	1	0	0	0	1	0	0	0	1	0	0	0	1	0	0	0	0	1	0	1
Gm15737	7	0	1	0	0	0	0	0	0	1	1	0	1	1	0	1	0	0	0	0	0	0	0	1	0	No
Acaa1b	7	0	0	0	0	0	0	0	0	1	0	0	1	1	1	1	0	1	0	1	0	0	0	0	0
Mir128-2	7	0	0	0	0	0	0	0	0	1	0	0	1	1	1	1	0	1	0	1	0	0	0	0	0
Gm10234	7	0	1	0	0	0	0	0	0	1	1	0	1	1	0	1	0	0	0	0	0	0	0	1	0	No
Adrb2	6	0	0	1	0	0	0	0	0	1	1	0	1	0	0	0	0	0	0	0	0	1	0	1	0
Camk2a	6	0	0	1	0	0	0	0	0	1	1	0	1	0	0	0	0	0	0	0	0	1	0	1	0
Ctnnb1	6	0	0	0	0	0	0	0	0	1	0	0	0	1	1	1	0	1	0	1	0	0	0	0	0
Cck	6	0	0	0	0	0	0	0	0	1	0	0	0	1	1	1	0	1	0	1	0	0	0	0	0
Cd8a	6	1	0	0	1	1	0	0	0	0	0	1	0	0	0	0	0	0	0	0	0	0	1	0	1
Cd8b1	6	1	0	0	1	1	0	0	0	0	0	1	0	0	0	0	0	0	0	0	0	0	1	0	1
Cdx1	6	0	0	1	0	0	0	0	0	1	1	0	1	0	0	0	0	0	0	0	0	1	0	1	0
Fbn2	6	0	0	0	0	0	0	0	0	1	1	0	1	0	0	0	1	0	0	0	0	1	0	1	0
Fech	6	0	0	1	0	0	0	0	0	1	1	0	1	0	0	0	0	0	0	0	0	1	0	1	0
Glul	6	0	0	0	0	0	0	0	0	1	0	0	1	1	0	1	0	0	0	1	0	0	0	1	0
Cd74	6	0	0	1	0	0	0	0	0	1	1	0	1	0	0	0	0	0	0	0	0	1	0	1	0
Lmnb1	6	0	0	0	0	0	0	0	0	1	1	0	1	0	0	0	1	0	0	0	0	1	0	1	0
Ncf2	6	0	0	0	0	0	0	0	0	1	0	0	1	1	0	1	0	0	0	1	0	0	0	1	0
Nktr	6	0	0	0	0	0	0	0	0	1	0	0	0	1	1	1	0	1	0	1	0	0	0	0	0
Pde6a	6	0	0	1	0	0	0	0	0	1	1	0	1	0	0	0	0	0	0	0	0	1	0	1	0
Pdgfrb	6	0	0	1	0	0	0	0	0	1	1	0	1	0	0	0	0	0	0	0	0	1	0	1	0
Ptgs2	6	0	0	0	0	0	0	0	0	1	0	0	1	1	0	1	0	0	0	1	0	0	0	1	0
Pdc	6	0	0	0	0	0	0	0	0	1	0	0	1	1	0	1	0	0	0	1	0	0	0	1	0
Rps14	6	0	0	1	0	0	0	0	0	1	1	0	1	0	0	0	0	0	0	0	0	1	0	1	0
Kdm3a	6	1	0	0	1	1	0	0	0	0	0	1	0	0	0	0	0	0	0	0	0	0	1	0	1
Lamc2	6	0	0	0	0	0	0	0	0	1	0	0	1	1	0	1	0	0	0	1	0	0	0	1	0
Lamc1	6	0	0	0	0	0	0	0	0	1	0	0	1	1	0	1	0	0	0	1	0	0	0	1	0
Slc12a2	6	0	0	0	0	0	0	0	0	1	1	0	1	0	0	0	1	0	0	0	0	1	0	1	0
Clec3b	6	0	0	0	0	0	0	0	0	1	0	0	0	1	1	1	0	1	0	1	0	0	0	0	0
Napg	6	0	0	1	0	0	0	0	0	1	1	0	1	0	0	0	0	0	0	0	0	1	0	1	0
Ndst1	6	0	0	1	0	0	0	0	0	1	1	0	1	0	0	0	0	0	0	0	0	1	0	1	0
Smyd1	6	1	0	0	1	1	0	0	0	0	0	1	0	0	0	0	0	0	0	0	0	0	1	0	1
Tgoln1	6	1	0	0	1	1	0	0	0	0	0	1	0	0	0	0	0	0	0	0	0	0	1	0	1
Rpsa	6	0	0	0	0	0	0	0	0	1	0	0	0	1	1	1	0	1	0	1	0	0	0	0	0
St8sia3	6	0	0	1	0	0	0	0	0	1	1	0	1	0	0	0	0	0	0	0	0	1	0	1	0
Cacna1e	6	0	0	0	0	0	0	0	0	1	0	0	1	1	0	1	0	0	0	1	0	0	0	1	0
Fyco1	6	0	0	0	0	0	0	0	0	1	0	0	0	1	1	1	0	1	0	1	0	0	0	0	0
Rgl1	6	0	0	0	0	0	0	0	0	1	0	0	1	1	0	1	0	0	0	1	0	0	0	1	0
Usp39	6	1	0	0	1	1	0	0	0	0	0	1	0	0	0	0	0	0	0	0	0	0	1	0	1
Snrk	6	0	0	0	0	0	0	0	0	1	0	0	0	1	1	1	0	1	0	1	0	0	0	0	0
Dhx9	6	0	0	0	0	0	0	0	0	1	0	0	1	1	0	1	0	0	0	1	0	0	0	1	0
Aldh7a1	6	0	0	0	0	0	0	0	0	1	1	0	1	0	0	0	1	0	0	0	0	1	0	1	0
Rgs16	6	0	0	0	0	0	0	0	0	1	0	0	1	1	0	1	0	0	0	1	0	0	0	1	0
Rgs8	6	0	0	0	0	0	0	0	0	1	0	0	1	1	0	1	0	0	0	1	0	0	0	1	0
Mobp	6	0	0	0	0	0	0	0	0	1	0	0	0	1	1	1	0	1	0	1	0	0	0	0	0
Htr4	6	0	0	1	0	0	0	0	0	1	1	0	1	0	0	0	0	0	0	0	0	1	0	1	0
Vipr1	6	0	0	0	0	0	0	0	0	1	0	0	0	1	1	1	0	1	0	1	0	0	0	0	0
Rnf103	6	1	0	0	1	1	0	0	0	0	0	1	0	0	0	0	0	0	0	0	0	0	1	0	1
Sftpb	6	1	0	0	1	1	0	0	0	0	0	1	0	0	0	0	0	0	0	0	0	0	1	0	1
Tcof1	6	0	0	1	0	0	0	0	0	1	1	0	1	0	0	0	0	0	0	0	0	1	0	1	0
Slc26a2	6	0	0	1	0	0	0	0	0	1	1	0	1	0	0	0	0	0	0	0	0	1	0	1	0
Slc2a2	6	0	0	0	1	1	0	0	0	1	0	0	0	0	0	0	0	1	0	0	0	0	1	0	1
Polr1a	6	1	0	0	1	1	0	0	0	0	0	1	0	0	0	0	0	0	0	0	0	0	1	0	1
Kif15	6	0	0	0	0	0	0	0	0	1	0	0	0	1	1	1	0	1	0	1	0	0	0	0	0
Capg	6	1	0	0	1	1	0	0	0	0	0	1	0	0	0	0	0	0	0	0	0	0	1	0	1
Rnasel	6	0	0	0	0	0	0	0	0	1	0	0	1	1	0	1	0	0	0	1	0	0	0	1	0
Astn1	6	0	0	0	0	0	1	0	0	1	0	0	1	1	0	1	0	0	0	1	0	0	0	0	0
Reep1	6	1	0	0	1	1	0	0	0	0	0	1	0	0	0	0	0	0	0	0	0	0	1	0	1
Synpo	6	0	0	1	0	0	0	0	0	1	1	0	1	0	0	0	0	0	0	0	0	1	0	1	0
Rnf2	6	0	0	0	0	0	0	0	0	1	0	0	1	1	0	1	0	0	0	1	0	0	0	1	0
Pla2g4a	6	0	0	0	0	0	0	0	0	1	0	0	1	1	0	1	0	0	0	1	0	0	0	1	0
Mr1	6	0	0	0	0	0	0	0	0	1	0	0	1	1	0	1	0	0	0	1	0	0	0	1	0
Tcaim	6	0	0	0	0	0	0	0	0	1	0	0	0	1	1	1	0	1	0	1	0	0	0	0	0
Iqsec1	6	0	1	0	0	0	0	0	0	1	0	0	1	1	0	1	0	0	0	0	0	0	0	1	0
Ccr8	6	0	0	0	0	0	0	0	0	1	0	0	0	1	1	1	0	1	0	1	0	0	0	0	0
Zfp105	6	0	0	0	0	0	0	0	0	1	0	0	0	1	1	1	0	1	0	1	0	0	0	0	0
Tmem42	6	0	0	0	0	0	0	0	0	1	0	0	0	1	1	1	0	1	0	1	0	0	0	0	0
Entpd3	6	0	0	0	0	0	0	0	0	1	0	0	0	1	1	1	0	1	0	1	0	0	0	0	0
Cx3cr1	6	0	0	0	0	0	0	0	0	1	0	0	0	1	1	1	0	1	0	1	0	0	0	0	0
Xirp1	6	0	0	0	0	0	0	0	0	1	0	0	0	1	1	1	0	1	0	1	0	0	0	0	0
Grpel2	6	0	0	1	0	0	0	0	0	1	1	0	1	0	0	0	0	0	0	0	0	1	0	1	0
Vamp8	6	1	0	0	1	1	0	0	0	0	0	1	0	0	0	0	0	0	0	0	0	0	1	0	1
Slc6a20b	6	0	0	0	0	0	0	0	0	1	0	0	0	1	1	1	0	1	0	1	0	0	0	0	0
Ier5	6	0	0	0	0	0	0	0	0	1	0	0	1	1	0	1	0	0	0	1	0	0	0	1	0
Cyp8b1	6	0	0	0	0	0	0	0	0	1	0	0	0	1	1	1	0	1	0	1	0	0	0	0	0
Csf1r	6	0	0	1	0	0	0	0	0	1	1	0	1	0	0	0	0	0	0	0	0	1	0	1	0
St3gal5	6	1	0	0	1	1	0	0	0	0	0	1	0	0	0	0	0	0	0	0	0	0	1	0	1
Ccr9	6	0	0	0	0	0	0	0	0	1	0	0	0	1	1	1	0	1	0	1	0	0	0	0	0
Xcr1	6	0	0	0	0	0	0	0	0	1	0	0	0	1	1	1	0	1	0	1	0	0	0	0	0
Ss18l2	6	0	0	0	0	0	0	0	0	1	0	0	0	1	1	1	0	1	0	1	0	0	0	0	0
Limd1	6	0	0	0	0	0	0	0	0	1	0	0	0	1	1	1	0	1	0	1	0	0	0	0	0
Vamp5	6	1	0	0	1	1	0	0	0	0	0	1	0	0	0	0	0	0	0	0	0	0	1	0	1
Nup210	6	0	1	0	0	0	0	0	0	1	0	0	1	1	0	1	0	0	0	0	0	0	0	1	0
Atp8b1	6	0	0	1	0	0	0	0	0	1	1	0	1	0	0	0	0	0	0	0	0	1	0	1	0
Txnl1	6	0	0	1	0	0	0	0	0	1	1	0	1	0	0	0	0	0	0	0	0	1	0	1	0
Wdr7	6	0	0	1	0	0	0	0	0	1	1	0	1	0	0	0	0	0	0	0	0	1	0	1	0
Ackr2	6	0	0	0	0	0	0	0	0	1	0	0	0	1	1	1	0	1	0	1	0	0	0	0	0
Phax	6	0	0	0	0	0	0	0	0	1	1	0	1	0	0	0	1	0	0	0	0	1	0	1	0
Stx6	6	0	0	0	0	0	0	0	0	1	0	0	1	1	0	1	0	0	0	1	0	0	0	1	0
Iigp1	6	0	0	1	0	0	0	0	0	1	1	0	1	0	0	0	0	0	0	0	0	1	0	1	0
Ggcx	6	1	0	0	1	1	0	0	0	0	0	1	0	0	0	0	0	0	0	0	0	0	1	0	1
Il17b	6	0	0	1	0	0	0	0	0	1	1	0	1	0	0	0	0	0	0	0	0	1	0	1	0
Prg4	6	0	0	0	0	0	0	0	0	1	0	0	1	1	0	1	0	0	0	1	0	0	0	1	0
1110059G10Rik	6	0	0	0	0	0	0	0	0	1	0	0	0	1	1	1	0	1	0	1	0	0	0	0	0
Mrpl35	6	1	0	0	1	1	0	0	0	0	0	1	0	0	0	0	0	0	0	0	0	0	1	0	1
Exosc7	6	0	0	0	0	0	0	0	0	1	0	0	0	1	1	1	0	1	0	1	0	0	0	0	0
Rnf181	6	1	0	0	1	1	0	0	0	0	0	1	0	0	0	0	0	0	0	0	0	0	1	0	1
Tsen15	6	0	0	0	0	0	0	0	0	1	0	0	1	1	0	1	0	0	0	1	0	0	0	1	0
Chmp3	6	1	0	0	1	1	0	0	0	0	0	1	0	0	0	0	0	0	0	0	0	0	1	0	1
Rbm22	6	0	0	1	0	0	0	0	0	1	1	0	1	0	0	0	0	0	0	0	0	1	0	1	0
Swt1	6	0	0	0	0	0	0	0	0	1	0	0	1	1	0	1	0	0	0	1	0	0	0	1	0
Edem3	6	0	0	0	0	0	0	0	0	1	0	0	1	1	0	1	0	0	0	1	0	0	0	1	0
Trak1	6	0	0	0	0	0	0	0	0	1	0	0	0	1	1	1	0	1	0	1	0	0	0	0	0
Rpl14	6	0	0	0	0	0	0	0	0	1	0	0	0	1	1	1	0	1	0	1	0	0	0	0	0
Tex43	6	0	0	0	0	0	0	0	0	1	1	0	1	0	0	0	1	0	0	0	0	1	0	1	0
Retsat	6	1	0	0	1	1	0	0	0	0	0	1	0	0	0	0	0	0	0	0	0	0	1	0	1
Abhd5	6	0	0	0	0	0	0	0	0	1	0	0	0	1	1	1	0	1	0	1	0	0	0	0	0
Cog6	6	0	0	0	0	0	0	0	0	1	1	0	0	1	1	1	0	0	0	1	0	0	0	0	0
Wdr48	6	0	0	0	0	0	0	0	0	1	0	0	0	1	1	1	0	1	0	1	0	0	0	0	0
Gramd3	6	0	0	0	0	0	0	0	0	1	1	0	1	0	0	0	1	0	0	0	0	1	0	1	0
Dctn4	6	0	0	1	0	0	0	0	0	1	1	0	1	0	0	0	0	0	0	0	0	1	0	1	0
Arpc5	6	0	0	0	0	0	0	0	0	1	0	0	1	1	0	1	0	0	0	1	0	0	0	1	0
Rpl22l1	6	0	0	0	1	1	0	0	0	1	0	0	0	0	0	0	0	1	0	0	0	0	1	0	1
0610030E20Rik	6	1	0	0	1	1	0	0	0	0	0	1	0	0	0	0	0	0	0	0	0	0	1	0	1
Rmnd5a	6	1	0	0	1	1	0	0	0	0	0	1	0	0	0	0	0	0	0	0	0	0	1	0	1
Prrc1	6	0	0	0	0	0	0	0	0	1	1	0	1	0	0	0	1	0	0	0	0	1	0	1	0
Trmt1l	6	0	0	0	0	0	0	0	0	1	0	0	1	1	0	1	0	0	0	1	0	0	0	1	0
Eif1b	6	0	0	0	0	0	0	0	0	1	0	0	0	1	1	1	0	1	0	1	0	0	0	0	0
Tnik	6	0	0	0	1	1	0	0	0	1	0	0	0	0	0	0	0	1	0	0	0	0	1	0	1
Lyzl4	6	0	0	0	0	0	0	0	0	1	0	0	0	1	1	1	0	1	0	1	0	0	0	0	0
1700025G04Rik	6	0	0	0	0	0	0	0	0	1	0	0	1	1	0	1	0	0	0	1	0	0	0	1	0
Smim3	6	0	0	1	0	0	0	0	0	1	1	0	1	0	0	0	0	0	0	0	0	1	0	1	0
Ptcd3	6	1	0	0	1	1	0	0	0	0	0	1	0	0	0	0	0	0	0	0	0	0	1	0	1
Nars	6	0	0	1	0	0	0	0	0	1	1	0	1	0	0	0	0	0	0	0	0	1	0	1	0
Atoh8	6	1	0	0	1	1	0	0	0	0	0	1	0	0	0	0	0	0	0	0	0	0	1	0	1
Apobec4	6	0	0	0	0	0	0	0	0	1	0	0	1	1	0	1	0	0	0	1	0	0	0	1	0
Piezo2	6	0	0	1	0	0	0	0	0	1	1	0	1	0	0	0	0	0	0	0	0	1	0	1	0
Slc41a3	6	0	1	0	0	0	0	0	0	1	0	0	1	1	0	1	0	0	0	0	0	0	0	1	0
Shcbp1l	6	0	0	0	0	0	0	0	0	1	0	0	1	1	0	1	0	0	0	1	0	0	0	1	0
Tmem158	6	0	0	0	0	0	0	0	0	1	0	0	0	1	1	1	0	1	0	1	0	0	0	0	0
Klhl40	6	0	0	0	0	0	0	0	0	1	0	0	0	1	1	1	0	1	0	1	0	0	0	0	0
Proser1	6	0	0	0	0	0	0	0	0	1	1	0	0	1	1	1	0	0	0	1	0	0	0	0	0
Lhfp	6	0	0	0	0	0	0	0	0	1	1	0	0	1	1	1	0	0	0	1	0	0	0	0	0
Ccdc13	6	0	0	0	0	0	0	0	0	1	0	0	0	1	1	1	0	1	0	1	0	0	0	0	0
3110040M04Rik	6	0	0	0	0	0	0	0	0	1	0	0	1	1	0	1	0	0	0	1	0	0	0	1	0
Ttc21a	6	0	0	0	0	0	0	0	0	1	0	0	0	1	1	1	0	1	0	1	0	0	0	0	0
Npl	6	0	0	0	0	0	0	0	0	1	0	0	1	1	0	1	0	0	0	1	0	0	0	1	0
Ulk4	6	0	0	0	0	0	0	0	0	1	0	0	0	1	1	1	0	1	0	1	0	0	0	0	0
Gorasp1	6	0	0	0	0	0	0	0	0	1	0	0	0	1	1	1	0	1	0	1	0	0	0	0	0
Hhatl	6	0	0	0	0	0	0	0	0	1	0	0	0	1	1	1	0	1	0	1	0	0	0	0	0
Tpr	6	0	0	0	0	0	0	0	0	1	0	0	1	1	0	1	0	0	0	1	0	0	0	1	0
Ccdc192	6	0	0	0	0	0	0	0	0	1	1	0	1	0	0	0	1	0	0	0	0	1	0	1	0
Egfem1	6	0	0	0	1	1	0	0	0	1	0	0	0	0	0	0	0	1	0	0	0	0	1	0	1
Teddm2	6	0	0	0	0	0	0	0	0	1	0	0	1	1	0	1	0	0	0	1	0	0	0	1	0
Immt	6	1	0	0	1	1	0	0	0	0	0	1	0	0	0	0	0	0	0	0	0	0	1	0	1
Emx1	6	0	0	0	1	1	0	1	0	0	0	1	0	0	0	0	0	0	0	0	0	0	1	0	1
C330018D20Rik	6	0	0	0	0	0	0	0	0	1	1	0	1	0	0	0	1	0	0	0	0	1	0	1	0
Zdhhc3	6	0	0	0	0	0	0	0	0	1	0	0	0	1	1	1	0	1	0	1	0	0	0	0	0
Higd1a	6	0	0	0	0	0	0	0	0	1	0	0	0	1	1	1	0	1	0	1	0	0	0	0	0
Sacm1l	6	0	0	0	0	0	0	0	0	1	0	0	0	1	1	1	0	1	0	1	0	0	0	0	0
Eif5a2	6	0	0	0	1	1	0	0	0	1	0	0	0	0	0	0	0	1	0	0	0	0	1	0	1
Nedd4l	6	0	0	1	0	0	0	0	0	1	1	0	1	0	0	0	0	0	0	0	0	1	0	1	0
Cxcr6	6	0	0	0	0	0	0	0	0	1	0	0	0	1	1	1	0	1	0	1	0	0	0	0	0
Lztfl1	6	0	0	0	0	0	0	0	0	1	0	0	0	1	1	1	0	1	0	1	0	0	0	0	0
Csnk1a1	6	0	0	1	0	0	0	0	0	1	1	0	1	0	0	0	0	0	0	0	0	1	0	1	0
Fam129a	6	0	0	0	0	0	0	0	0	1	0	0	1	1	0	1	0	0	0	1	0	0	0	1	0
Sfxn5	6	0	0	0	1	1	0	1	0	0	0	1	0	0	0	0	0	0	0	0	0	0	1	0	1
Colgalt2	6	0	0	0	0	0	0	0	0	1	0	0	1	1	0	1	0	0	0	1	0	0	0	1	0
Lars2	6	0	0	0	0	0	0	0	0	1	0	0	0	1	1	1	0	1	0	1	0	0	0	0	0
Ano10	6	0	0	0	0	0	0	0	0	1	0	0	0	1	1	1	0	1	0	1	0	0	0	0	0
Slc6a20a	6	0	0	0	0	0	0	0	0	1	0	0	0	1	1	1	0	1	0	1	0	0	0	0	0
Zfp445	6	0	0	0	0	0	0	0	0	1	0	0	0	1	1	1	0	1	0	1	0	0	0	0	0
Pomgnt2	6	0	0	0	0	0	0	0	0	1	0	0	0	1	1	1	0	1	0	1	0	0	0	0	0
Afap1l1	6	0	0	1	0	0	0	0	0	1	1	0	1	0	0	0	0	0	0	0	0	1	0	1	0
Slc6a7	6	0	0	1	0	0	0	0	0	1	1	0	1	0	0	0	0	0	0	0	0	1	0	1	0
Ivns1abp	6	0	0	0	0	0	0	0	0	1	0	0	1	1	0	1	0	0	0	1	0	0	0	1	0
Myrip	6	0	0	0	0	0	0	0	0	1	0	0	0	1	1	1	0	1	0	1	0	0	0	0	0
Csrnp1	6	0	0	0	0	0	0	0	0	1	0	0	0	1	1	1	0	1	0	1	0	0	0	0	0
Stoml3	6	0	0	0	0	0	0	0	0	1	1	0	0	1	1	1	0	0	0	1	0	0	0	0	0
Sec22c	6	0	0	0	0	0	0	0	0	1	0	0	0	1	1	1	0	1	0	1	0	0	0	0	0
Hmgxb3	6	0	0	1	0	0	0	0	0	1	1	0	1	0	0	0	0	0	0	0	0	1	0	1	0
Cdcp1	6	0	0	0	0	0	0	0	0	1	0	0	0	1	1	1	0	1	0	1	0	0	0	0	0
Ablim3	6	0	0	1	0	0	0	0	0	1	1	0	1	0	0	0	0	0	0	0	0	1	0	1	0
Oacyl	6	0	0	1	0	0	0	0	0	1	1	0	1	0	0	0	0	0	0	0	0	1	0	1	0
Brinp2	6	0	0	0	0	0	1	0	0	1	0	0	1	1	0	1	0	0	0	1	0	0	0	0	0
2020-03-03	6	0	0	0	0	0	0	0	0	1	1	0	1	0	0	0	1	0	0	0	0	1	0	1	0
Mat2a	6	1	0	0	1	1	0	0	0	0	0	1	0	0	0	0	0	0	0	0	0	0	1	0	1
Nmnat2	6	0	0	0	0	0	0	0	0	1	0	0	1	1	0	1	0	0	0	1	0	0	0	1	0
Sh3tc2	6	0	0	1	0	0	0	0	0	1	1	0	1	0	0	0	0	0	0	0	0	1	0	1	0
Frem2	6	0	0	0	0	0	0	0	0	1	1	0	0	1	1	1	0	0	0	1	0	0	0	0	0
Nhlrc3	6	0	0	0	0	0	0	0	0	1	1	0	0	1	1	1	0	0	0	1	0	0	0	0	0
Fbxo38	6	0	0	1	0	0	0	0	0	1	1	0	1	0	0	0	0	0	0	0	0	1	0	1	0
Topaz1	6	0	0	0	0	0	0	0	0	1	0	0	0	1	1	1	0	1	0	1	0	0	0	0	0
Ppargc1b	6	0	0	1	0	0	0	0	0	1	1	0	1	0	0	0	0	0	0	0	0	1	0	1	0
Malt1	6	0	0	1	0	0	0	0	0	1	1	0	1	0	0	0	0	0	0	0	0	1	0	1	0
Elmod3	6	1	0	0	1	1	0	0	0	0	0	1	0	0	0	0	0	0	0	0	0	0	1	0	1
Alpk2	6	0	0	1	0	0	0	0	0	1	1	0	1	0	0	0	0	0	0	0	0	1	0	1	0
Odr4	6	0	0	0	0	0	0	0	0	1	0	0	1	1	0	1	0	0	0	1	0	0	0	1	0
Tmem150a	6	1	0	0	1	1	0	0	0	0	0	1	0	0	0	0	0	0	0	0	0	0	1	0	1
Arsi	6	0	0	1	0	0	0	0	0	1	1	0	1	0	0	0	0	0	0	0	0	1	0	1	0
Zfp651	6	0	0	0	0	0	0	0	0	1	0	0	0	1	1	1	0	1	0	1	0	0	0	0	0
BC034090	6	0	0	0	0	0	0	0	0	1	0	0	1	1	0	1	0	0	0	1	0	0	0	1	0
Slc25a38	6	0	0	0	0	0	0	0	0	1	0	0	0	1	1	1	0	1	0	1	0	0	0	0	0
Onecut2	6	0	0	1	0	0	0	0	0	1	1	0	1	0	0	0	0	0	0	0	0	1	0	1	0
Teddm1a	6	0	0	0	0	0	0	0	0	1	0	0	1	1	0	1	0	0	0	1	0	0	0	1	0
Mir122	6	0	0	1	0	0	0	0	0	1	1	0	1	0	0	0	0	0	0	0	0	1	0	1	0
Mir138-1	6	0	0	0	0	0	0	0	0	1	0	0	0	1	1	1	0	1	0	1	0	0	0	0	0
Mir143	6	0	0	1	0	0	0	0	0	1	1	0	1	0	0	0	0	0	0	0	0	1	0	1	0
Mir145a	6	0	0	1	0	0	0	0	0	1	1	0	1	0	0	0	0	0	0	0	0	1	0	1	0
Hdac11	6	0	1	0	0	0	0	0	0	1	0	0	1	1	0	1	0	0	0	0	0	0	0	1	0
Smg7	6	0	0	0	0	0	0	0	0	1	0	0	1	1	0	1	0	0	0	1	0	0	0	1	0
Tgm4	6	0	0	0	0	0	0	0	0	1	0	0	0	1	1	1	0	1	0	1	0	0	0	0	0
Hmcn1	6	0	0	0	0	0	0	0	0	1	0	0	1	1	0	1	0	0	0	1	0	0	0	1	0
Rgsl1	6	0	0	0	0	0	0	0	0	1	0	0	1	1	0	1	0	0	0	1	0	0	0	1	0
Zfp648	6	0	0	0	0	0	0	0	0	1	0	0	1	1	0	1	0	0	0	1	0	0	0	1	0
Megf10	6	0	0	0	0	0	0	0	0	1	1	0	1	0	0	0	1	0	0	0	0	1	0	1	0
Gm1527	6	0	0	0	1	1	0	0	0	1	0	0	0	0	0	0	0	1	0	0	0	0	1	0	1
Zfp532	6	0	0	1	0	0	0	0	0	1	1	0	1	0	0	0	0	0	0	0	0	1	0	1	0
Zkscan7	6	0	0	0	0	0	0	0	0	1	0	0	0	1	1	1	0	1	0	1	0	0	0	0	0
Fam198a	6	0	0	0	0	0	0	0	0	1	0	0	0	1	1	1	0	1	0	1	0	0	0	0	0
Fat4	6	0	0	0	0	0	0	0	0	1	0	0	0	1	1	1	0	1	0	1	0	0	0	0	0
Arhgef37	6	0	0	1	0	0	0	0	0	1	1	0	1	0	0	0	0	0	0	0	0	1	0	1	0
Pld1	6	0	0	0	1	1	0	0	0	1	0	0	0	0	0	0	0	1	0	0	0	0	1	0	1
Apcdd1	6	0	0	1	0	0	0	0	0	1	1	0	1	0	0	0	0	0	0	0	0	1	0	1	0
Spink10	6	0	0	1	0	0	0	0	0	1	1	0	1	0	0	0	0	0	0	0	0	1	0	1	0
F830016B08Rik	6	0	0	1	0	0	0	0	0	1	1	0	1	0	0	0	0	0	0	0	0	1	0	1	0
Pcyox1l	6	0	0	1	0	0	0	0	0	1	1	0	1	0	0	0	0	0	0	0	0	1	0	1	0
Mir378a	6	0	0	1	0	0	0	0	0	1	1	0	1	0	0	0	0	0	0	0	0	1	0	1	0
Spink13	6	0	0	1	0	0	0	0	0	1	1	0	1	0	0	0	0	0	0	0	0	1	0	1	0
Ctxn3	6	0	0	0	0	0	0	0	0	1	1	0	1	0	0	0	1	0	0	0	0	1	0	1	0
Gm4841	6	0	0	1	0	0	0	0	0	1	1	0	1	0	0	0	0	0	0	0	0	1	0	1	0
Spink7	6	0	0	1	0	0	0	0	0	1	1	0	1	0	0	0	0	0	0	0	0	1	0	1	0
Gm4951	6	0	0	1	0	0	0	0	0	1	1	0	1	0	0	0	0	0	0	0	0	1	0	1	0
Teddm1b	6	0	0	0	0	0	0	0	0	1	0	0	1	1	0	1	0	0	0	1	0	0	0	1	0
Gm36368	6	0	0	1	0	0	0	0	0	1	1	0	1	0	0	0	0	0	0	0	0	1	0	1	0
Gm8947	6	0	0	0	0	0	0	0	0	1	0	0	1	1	0	1	0	0	0	1	0	0	0	1	0
Abl2	5	0	0	0	0	0	0	0	0	1	0	0	1	1	0	1	0	0	0	1	0	0	0	0	0
Serpinc1	5	0	0	0	0	0	1	0	0	1	0	0	0	1	0	1	0	0	0	1	0	0	0	0	0
Atp1b1	5	0	0	0	0	0	1	0	0	1	0	0	0	1	0	1	0	0	0	1	0	0	0	0	0
Ccnd3	5	0	0	0	0	1	0	0	0	1	0	0	1	0	0	1	0	0	0	0	0	0	1	0	0
F5	5	0	0	0	0	0	1	0	0	1	0	0	0	1	0	1	0	0	0	1	0	0	0	0	0
Dcc	5	1	0	1	0	0	1	0	0	0	0	1	0	0	0	0	0	0	0	0	0	1	0	0	0
Ect2	5	0	0	0	1	1	0	0	0	0	0	0	0	0	0	0	0	1	0	0	0	0	1	0	1
Esd	5	0	1	1	0	0	0	0	0	1	1	0	1	0	0	0	0	0	0	0	0	0	0	0	0
Fabp1	5	1	0	0	1	1	0	0	0	0	0	0	0	0	0	0	0	0	0	0	0	0	1	0	1
Fgf2	5	0	0	0	0	0	0	0	0	1	0	0	0	1	0	1	0	1	0	1	0	0	0	0	0
Gch1	5	0	0	0	0	0	1	0	0	1	1	0	1	0	0	0	0	0	0	1	0	0	0	0	0
Hsp90ab1	5	0	0	0	0	1	0	0	0	1	0	0	1	0	0	1	0	0	0	0	0	0	1	0	0
Igkv15-103	5	1	0	0	1	1	0	0	0	0	0	0	0	0	0	0	0	0	0	0	0	0	1	0	1
Igkv13-84	5	1	0	0	1	1	0	0	0	0	0	0	0	0	0	0	0	0	0	0	0	0	1	0	1
Il2	5	0	0	0	0	0	0	0	0	1	0	0	0	1	0	1	0	1	0	1	0	0	0	0	0
Itpr1	5	0	1	0	0	1	1	0	0	0	0	0	0	0	0	1	0	0	0	0	0	0	1	0	0
Lgals3	5	0	0	0	0	0	1	0	0	1	1	0	1	0	0	0	0	0	0	1	0	0	0	0	0
Mea1	5	0	0	0	0	1	0	0	0	1	0	0	1	0	0	1	0	0	0	0	0	0	1	0	0
Nfya	5	0	0	0	0	1	0	0	0	1	0	0	1	0	0	1	0	0	0	0	0	0	1	0	0
Prrx1	5	0	0	0	0	0	1	0	0	1	0	0	0	1	0	1	0	0	0	1	0	0	0	0	0
Rb1	5	0	1	1	0	0	0	0	0	1	1	0	1	0	0	0	0	0	0	0	0	0	0	0	0
Xpr1	5	0	0	0	0	0	0	0	0	1	0	0	1	1	0	1	0	0	0	1	0	0	0	0	0
Sele	5	0	0	0	0	0	1	0	0	1	0	0	0	1	0	1	0	0	0	1	0	0	0	0	0
Sell	5	0	0	0	0	0	1	0	0	1	0	0	0	1	0	1	0	0	0	1	0	0	0	0	0
Selp	5	0	0	0	0	0	1	0	0	1	0	0	0	1	0	1	0	0	0	1	0	0	0	0	0
Tcf4	5	1	0	1	0	0	1	0	0	0	0	1	0	0	0	0	0	0	0	0	0	1	0	0	0
Tcte1	5	0	0	0	0	1	0	0	0	1	0	0	1	0	0	1	0	0	0	0	0	0	1	0	0
Pgc	5	0	0	0	0	1	0	0	0	1	0	0	1	0	0	1	0	0	0	0	0	0	1	0	0
Igkv6-23	5	1	0	0	1	1	0	0	0	0	0	0	0	0	0	0	0	0	0	0	0	0	1	0	1
Fasl	5	0	0	0	0	0	1	0	0	1	0	0	0	1	0	1	0	0	0	1	0	0	0	0	0
Tnr	5	0	0	0	0	0	1	0	0	1	0	0	0	1	0	1	0	0	0	1	0	0	0	0	0
Runx2	5	0	0	0	0	1	0	0	0	1	0	0	1	0	0	1	0	0	0	0	0	0	1	0	0
Lhx4	5	0	0	0	0	0	0	0	0	1	0	0	1	1	0	1	0	0	0	1	0	0	0	0	0
Plk4	5	0	0	0	0	0	0	0	0	1	0	0	0	1	1	1	0	0	0	1	0	0	0	0	0
Guca1a	5	0	0	0	0	1	0	0	0	1	0	0	1	0	0	1	0	0	0	0	0	0	1	0	0
Prph2	5	0	0	0	0	1	0	0	0	1	0	0	1	0	0	1	0	0	0	0	0	0	1	0	0
Vegfa	5	0	0	0	0	1	0	0	0	1	0	0	1	0	0	1	0	0	0	0	0	0	1	0	0
Rpia	5	1	0	0	1	1	0	0	0	0	0	0	0	0	0	0	0	0	0	0	0	0	1	0	1
Adad1	5	0	0	0	0	0	0	0	0	1	0	0	0	1	0	1	0	1	0	1	0	0	0	0	0
Tfeb	5	0	0	0	0	1	0	0	0	1	0	0	1	0	0	1	0	0	0	0	0	0	1	0	0
Polr1c	5	0	0	0	0	1	0	0	0	1	0	0	1	0	0	1	0	0	0	0	0	0	1	0	0
Tnfsf4	5	0	0	0	0	0	1	0	0	1	0	0	0	1	0	1	0	0	0	1	0	0	0	0	0
Ccr3	5	0	0	0	0	0	0	0	0	1	0	0	0	1	1	1	0	0	0	1	0	0	0	0	0
Ccr1l1	5	0	0	0	0	0	0	0	0	1	0	0	0	1	1	1	0	0	0	1	0	0	0	0	0
Ccr1	5	0	0	0	0	0	0	0	0	1	0	0	0	1	1	1	0	0	0	1	0	0	0	0	0
Igkv1-110	5	1	0	0	1	1	0	0	0	0	0	0	0	0	0	0	0	0	0	0	0	0	1	0	1
Soat1	5	0	0	0	0	0	0	0	0	1	0	0	1	1	0	1	0	0	0	1	0	0	0	0	0
Lcp1	5	0	1	1	0	0	0	0	0	1	1	0	1	0	0	0	0	0	0	0	0	0	0	0	0
Tpt1	5	0	1	1	0	0	0	0	0	1	1	0	1	0	0	0	0	0	0	0	0	0	0	0	0
Anxa5	5	0	0	0	0	0	0	0	0	1	0	0	0	1	0	1	0	1	0	1	0	0	0	0	0
Yipf3	5	0	0	0	0	1	0	0	0	1	0	0	1	0	0	1	0	0	0	0	0	0	1	0	0
Srf	5	0	0	0	0	1	0	0	0	1	0	0	1	0	0	1	0	0	0	0	0	0	1	0	0
Elf1	5	0	1	1	0	0	0	0	0	1	1	0	1	0	0	0	0	0	0	0	0	0	0	0	0
Tnfsf10	5	0	0	0	1	1	0	0	0	0	0	0	0	0	0	0	0	1	0	0	0	0	1	0	1
Hspa4l	5	0	0	0	0	0	0	0	0	1	0	0	0	1	1	1	0	0	0	1	0	0	0	0	0
Kifap3	5	0	0	0	0	0	1	0	0	1	0	0	0	1	0	1	0	0	0	1	0	0	0	0	0
Igkv19-93	5	1	0	0	1	1	0	0	0	0	0	0	0	0	0	0	0	0	0	0	0	0	1	0	1
Igkv12-41	5	1	0	0	1	1	0	0	0	0	0	0	0	0	0	0	0	0	0	0	0	0	1	0	1
Mdfi	5	0	0	0	0	1	0	0	0	1	0	0	1	0	0	1	0	0	0	0	0	0	1	0	0
Igkv5-45	5	1	0	0	1	1	0	0	0	0	0	0	0	0	0	0	0	0	0	0	0	0	1	0	1
Gadd45a	5	1	0	0	1	1	0	0	0	0	0	0	0	0	0	0	0	0	0	0	0	0	1	0	1
Ccna2	5	0	0	0	0	0	0	0	0	1	0	0	0	1	0	1	0	1	0	1	0	0	0	0	0
Tsc22d1	5	0	1	1	0	0	0	0	0	1	1	0	1	0	0	0	0	0	0	0	0	0	0	0	0
Ktn1	5	0	0	0	0	0	1	0	0	1	1	0	1	0	0	0	0	0	0	1	0	0	0	0	0
Dnm3	5	0	0	0	0	0	1	0	0	1	0	0	0	1	0	1	0	0	0	1	0	0	0	0	0
Noct	5	0	0	0	0	0	0	0	0	1	0	0	0	1	1	1	0	0	0	1	0	0	0	0	0
Htr2a	5	0	1	1	0	0	0	0	0	1	1	0	1	0	0	0	0	0	0	0	0	0	0	0	0
Trpc3	5	0	0	0	0	0	0	0	0	1	0	0	0	1	0	1	0	1	0	1	0	0	0	0	0
Wbp4	5	0	1	1	0	0	0	0	0	1	1	0	1	0	0	0	0	0	0	0	0	0	0	0	0
Smad4	5	1	0	1	0	0	1	0	0	0	0	1	0	0	0	0	0	0	0	0	0	1	0	0	0
Prdx6	5	0	0	0	0	0	1	0	0	1	0	0	0	1	0	1	0	0	0	1	0	0	0	0	0
Igkv8-24	5	1	0	0	1	1	0	0	0	0	0	0	0	0	0	0	0	0	0	0	0	0	1	0	1
Bhlhe40	5	0	1	0	0	1	1	0	0	0	0	0	0	0	0	1	0	0	0	0	0	0	1	0	0
Kif6	5	0	0	0	0	1	0	0	0	1	0	0	1	0	0	1	0	0	0	0	0	0	1	0	0
D3Ertd254e	5	0	0	0	0	0	0	0	0	1	0	0	0	1	0	1	0	1	0	1	0	0	0	0	0
Tnfsf11	5	0	1	1	0	0	0	0	0	1	1	0	1	0	0	0	0	0	0	0	0	0	0	0	0
Fmo3	5	0	0	0	0	0	1	0	0	1	0	0	0	1	0	1	0	0	0	1	0	0	0	0	0
Guca1b	5	0	0	0	0	1	0	0	0	1	0	0	1	0	0	1	0	0	0	0	0	0	1	0	0
Nfkbie	5	0	0	0	0	1	0	0	0	1	0	0	1	0	0	1	0	0	0	0	0	0	1	0	0
Igkv4-78	5	1	0	0	1	1	0	0	0	0	0	0	0	0	0	0	0	0	0	0	0	0	1	0	1
Blzf1	5	0	0	0	0	0	1	0	0	1	0	0	0	1	0	1	0	0	0	1	0	0	0	0	0
Gnmt	5	0	0	0	0	1	0	0	0	1	0	0	1	0	0	1	0	0	0	0	0	0	1	0	0
Myoc	5	0	0	0	0	0	1	0	0	1	0	0	0	1	0	1	0	0	0	1	0	0	0	0	0
Atg14	5	0	0	0	0	0	1	0	0	1	1	0	1	0	0	0	0	0	0	1	0	0	0	0	0
Cacybp	5	0	0	0	0	0	1	0	0	1	0	0	0	1	0	1	0	0	0	1	0	0	0	0	0
Il12rb2	5	1	0	0	1	1	0	0	0	0	0	0	0	0	0	0	0	0	0	0	0	0	1	0	1
D3Ertd751e	5	0	0	0	0	0	0	0	0	1	0	0	0	1	1	1	0	0	0	1	0	0	0	0	0
Sucla2	5	0	1	1	0	0	0	0	0	1	1	0	1	0	0	0	0	0	0	0	0	0	0	0	0
Pcdh8	5	0	1	1	0	0	0	0	0	1	1	0	1	0	0	0	0	0	0	0	0	0	0	0	0
Itm2b	5	0	1	1	0	0	0	0	0	1	1	0	1	0	0	0	0	0	0	0	0	0	0	0	0
Fmo1	5	0	0	0	0	0	1	0	0	1	0	0	0	1	0	1	0	0	0	1	0	0	0	0	0
Igkj1	5	1	0	0	1	1	0	0	0	0	0	0	0	0	0	0	0	0	0	0	0	0	1	0	1
Cd2ap	5	1	0	0	0	1	0	0	0	1	0	0	0	0	0	1	0	0	0	0	0	0	1	0	0
Rab33b	5	0	0	0	0	0	0	0	0	1	0	0	0	1	1	1	0	0	0	1	0	0	0	0	0
Igkv3-12	5	1	0	0	1	1	0	0	0	0	0	0	0	0	0	0	0	0	0	0	0	0	1	0	1
Qsox1	5	0	0	0	0	0	0	0	0	1	0	0	1	1	0	1	0	0	0	1	0	0	0	0	0
Igkv3-10	5	1	0	0	1	1	0	0	0	0	0	0	0	0	0	0	0	0	0	0	0	0	1	0	1
Igkv6-13	5	1	0	0	1	1	0	0	0	0	0	0	0	0	0	0	0	0	0	0	0	0	1	0	1
Igkv6-14	5	1	0	0	1	1	0	0	0	0	0	0	0	0	0	0	0	0	0	0	0	0	1	0	1
Igkv6-15	5	1	0	0	1	1	0	0	0	0	0	0	0	0	0	0	0	0	0	0	0	0	1	0	1
Igkv6-20	5	1	0	0	1	1	0	0	0	0	0	0	0	0	0	0	0	0	0	0	0	0	1	0	1
Igkv8-21	5	1	0	0	1	1	0	0	0	0	0	0	0	0	0	0	0	0	0	0	0	0	1	0	1
Igkv8-16	5	1	0	0	1	1	0	0	0	0	0	0	0	0	0	0	0	0	0	0	0	0	1	0	1
Igkv8-19	5	1	0	0	1	1	0	0	0	0	0	0	0	0	0	0	0	0	0	0	0	0	1	0	1
Igkv8-18	5	1	0	0	1	1	0	0	0	0	0	0	0	0	0	0	0	0	0	0	0	0	1	0	1
Igkv3-3	5	1	0	0	1	1	0	0	0	0	0	0	0	0	0	0	0	0	0	0	0	0	1	0	1
Igkv3-2	5	1	0	0	1	1	0	0	0	0	0	0	0	0	0	0	0	0	0	0	0	0	1	0	1
Igkv3-1	5	1	0	0	1	1	0	0	0	0	0	0	0	0	0	0	0	0	0	0	0	0	1	0	1
Igkv3-7	5	1	0	0	1	1	0	0	0	0	0	0	0	0	0	0	0	0	0	0	0	0	1	0	1
Igkv3-5	5	1	0	0	1	1	0	0	0	0	0	0	0	0	0	0	0	0	0	0	0	0	1	0	1
Igkv3-4	5	1	0	0	1	1	0	0	0	0	0	0	0	0	0	0	0	0	0	0	0	0	1	0	1
Igkv3-9	5	1	0	0	1	1	0	0	0	0	0	0	0	0	0	0	0	0	0	0	0	0	1	0	1
Mbd1	5	1	0	1	0	0	1	0	0	0	0	1	0	0	0	0	0	0	0	0	0	1	0	0	0
Mbd2	5	1	0	1	0	0	1	0	0	0	0	1	0	0	0	0	0	0	0	0	0	1	0	0	0
Mrpl14	5	0	0	0	0	1	0	0	0	1	0	0	1	0	0	1	0	0	0	0	0	0	1	0	0
Gng12	5	1	0	0	1	1	0	0	0	0	0	0	0	0	0	0	0	0	0	0	0	0	1	0	1
Igkv14-100	5	1	0	0	1	1	0	0	0	0	0	0	0	0	0	0	0	0	0	0	0	0	1	0	1
Igkv12-98	5	1	0	0	1	1	0	0	0	0	0	0	0	0	0	0	0	0	0	0	0	0	1	0	1
Igkv10-96	5	1	0	0	1	1	0	0	0	0	0	0	0	0	0	0	0	0	0	0	0	0	1	0	1
Pcdh10	5	0	0	0	0	0	0	0	0	1	0	0	0	1	1	1	0	0	0	1	0	0	0	0	0
Igkv18-36	5	1	0	0	1	1	0	0	0	0	0	0	0	0	0	0	0	0	0	0	0	0	1	0	1
Igkv12-38	5	1	0	0	1	1	0	0	0	0	0	0	0	0	0	0	0	0	0	0	0	0	1	0	1
Igkv6-29	5	1	0	0	1	1	0	0	0	0	0	0	0	0	0	0	0	0	0	0	0	0	1	0	1
Igkv1-117	5	1	0	0	1	1	0	0	0	0	0	0	0	0	0	0	0	0	0	0	0	0	1	0	1
Igkv1-122	5	1	0	0	1	1	0	0	0	0	0	0	0	0	0	0	0	0	0	0	0	0	1	0	1
Igkv1-99	5	1	0	0	1	1	0	0	0	0	0	0	0	0	0	0	0	0	0	0	0	0	1	0	1
Aldh1l1	5	0	1	0	0	0	0	0	0	1	0	0	1	0	0	1	0	0	0	0	0	0	0	1	0
Igkv12-44	5	1	0	0	1	1	0	0	0	0	0	0	0	0	0	0	0	0	0	0	0	0	1	0	1
Igkv4-61	5	1	0	0	1	1	0	0	0	0	0	0	0	0	0	0	0	0	0	0	0	0	1	0	1
Igkv13-85	5	1	0	0	1	1	0	0	0	0	0	0	0	0	0	0	0	0	0	0	0	0	1	0	1
Igkv1-88	5	1	0	0	1	1	0	0	0	0	0	0	0	0	0	0	0	0	0	0	0	0	1	0	1
Igkv12-89	5	1	0	0	1	1	0	0	0	0	0	0	0	0	0	0	0	0	0	0	0	0	1	0	1
Igkv4-90	5	1	0	0	1	1	0	0	0	0	0	0	0	0	0	0	0	0	0	0	0	0	1	0	1
Cnmd	5	0	1	1	0	0	0	0	0	1	1	0	1	0	0	0	0	0	0	0	0	0	0	0	0
Igkv14-111	5	1	0	0	1	1	0	0	0	0	0	0	0	0	0	0	0	0	0	0	0	0	1	0	1
Igkv6-25	5	1	0	0	1	1	0	0	0	0	0	0	0	0	0	0	0	0	0	0	0	0	1	0	1
Igkv8-27	5	1	0	0	1	1	0	0	0	0	0	0	0	0	0	0	0	0	0	0	0	0	1	0	1
Eif2ak3	5	1	0	0	1	1	0	0	0	0	0	0	0	0	0	0	0	0	0	0	0	0	1	0	1
Apobec2	5	0	0	0	0	1	0	0	0	1	0	0	1	0	0	1	0	0	0	0	0	0	1	0	0
Spry1	5	0	0	0	0	0	0	0	0	1	0	0	0	1	0	1	0	1	0	1	0	0	0	0	0
Cop1	5	0	0	0	0	0	1	0	0	1	0	0	0	1	0	1	0	0	0	1	0	0	0	0	0
Poli	5	1	0	1	0	0	1	0	0	0	0	1	0	0	0	0	0	0	0	0	0	1	0	0	0
Slc7a11	5	0	0	0	0	0	0	0	0	1	0	0	0	1	1	1	0	0	0	1	0	0	0	0	0
Igkv4-54	5	1	0	0	1	1	0	0	0	0	0	0	0	0	0	0	0	0	0	0	0	0	1	0	1
Nufip1	5	0	1	1	0	0	0	0	0	1	1	0	1	0	0	0	0	0	0	0	0	0	0	0	0
Igkv20-101-2	5	1	0	0	1	1	0	0	0	0	0	0	0	0	0	0	0	0	0	0	0	0	1	0	1
Mrpl2	5	0	0	0	0	1	0	0	0	1	0	0	1	0	0	1	0	0	0	0	0	0	1	0	0
Capn11	5	0	0	0	0	1	0	0	0	1	0	0	1	0	0	1	0	0	0	0	0	0	1	0	0
Rabgap1l	5	0	0	0	0	0	1	0	0	1	0	0	0	1	0	1	0	0	0	1	0	0	0	0	0
Tor3a	5	0	0	0	0	0	0	0	0	1	0	0	1	1	0	1	0	0	0	1	0	0	0	0	0
Exosc9	5	0	0	0	0	0	0	0	0	1	0	0	0	1	0	1	0	1	0	1	0	0	0	0	0
Igkv5-43	5	1	0	0	1	1	0	0	0	0	0	0	0	0	0	0	0	0	0	0	0	0	1	0	1
Igkv8-34	5	1	0	0	1	1	0	0	0	0	0	0	0	0	0	0	0	0	0	0	0	0	1	0	1
Bysl	5	0	0	0	0	1	0	0	0	1	0	0	1	0	0	1	0	0	0	0	0	0	1	0	0
Vamp4	5	0	0	0	0	0	1	0	0	1	0	0	0	1	0	1	0	0	0	1	0	0	0	0	0
C330021F23Rik	5	0	0	0	0	0	0	0	0	1	0	0	0	1	0	1	0	1	0	1	0	0	0	0	0
Slc22a7	5	0	0	0	0	1	0	0	0	1	0	0	1	0	0	1	0	0	0	0	0	0	1	0	0
Gtpbp2	5	0	0	0	0	1	0	0	0	1	0	0	1	0	0	1	0	0	0	0	0	0	1	0	0
Ubr2	5	0	0	0	0	1	0	0	0	1	0	0	1	0	0	1	0	0	0	0	0	0	1	0	0
Tacstd2	5	1	0	0	1	1	0	0	0	0	0	0	0	0	0	0	0	0	0	0	0	0	1	0	1
Zfp318	5	0	0	0	0	1	0	0	0	1	0	0	1	0	0	1	0	0	0	0	0	0	1	0	0
Sumf1	5	0	1	0	0	1	0	0	0	0	0	0	0	0	0	1	0	0	0	0	0	0	1	1	0
Foxo1	5	0	0	0	0	0	0	0	0	1	0	0	0	1	1	1	0	0	0	1	0	0	0	0	0
Igkv4-51	5	1	0	0	1	1	0	0	0	0	0	0	0	0	0	0	0	0	0	0	0	0	1	0	1
Cpb2	5	0	1	1	0	0	0	0	0	1	1	0	1	0	0	0	0	0	0	0	0	0	0	0	0
Trem2	5	0	0	0	0	1	0	0	0	1	0	0	1	0	0	1	0	0	0	0	0	0	1	0	0
Taf8	5	0	0	0	0	1	0	0	0	1	0	0	1	0	0	1	0	0	0	0	0	0	1	0	0
Slc29a1	5	0	0	0	0	1	0	0	0	1	0	0	1	0	0	1	0	0	0	0	0	0	1	0	0
Spata5	5	0	0	0	0	0	0	0	0	1	0	0	0	1	0	1	0	1	0	1	0	0	0	0	0
Mrps10	5	0	0	0	0	1	0	0	0	1	0	0	1	0	0	1	0	0	0	0	0	0	1	0	0
Mrps14	5	0	0	0	0	0	1	0	0	1	0	0	0	1	0	1	0	0	0	1	0	0	0	0	0
Mocs1	5	0	0	0	0	1	0	0	0	1	0	0	1	0	0	1	0	0	0	0	0	0	1	0	0
Il21	5	0	0	0	0	0	0	0	0	1	0	0	0	1	0	1	0	1	0	1	0	0	0	0	0
Trem3	5	0	0	0	0	1	0	0	0	1	0	0	1	0	0	1	0	0	0	0	0	0	1	0	0
Trem1	5	0	0	0	0	1	0	0	0	1	0	0	1	0	0	1	0	0	0	0	0	0	1	0	0
Tomm6	5	0	0	0	0	1	0	0	0	1	0	0	1	0	0	1	0	0	0	0	0	0	1	0	0
Dnajc15	5	0	1	1	0	0	0	0	0	1	1	0	1	0	0	0	0	0	0	0	0	0	0	0	0
Rgcc	5	0	1	1	0	0	0	0	0	1	1	0	1	0	0	0	0	0	0	0	0	0	0	0	0
Rpl7l1	5	0	0	0	0	1	0	0	0	1	0	0	1	0	0	1	0	0	0	0	0	0	1	0	0
Ndufc1	5	0	0	0	0	0	0	0	0	1	0	0	0	1	1	1	0	0	0	1	0	0	0	0	0
Ska1	5	1	0	1	0	0	1	0	0	0	0	1	0	0	0	0	0	0	0	0	0	1	0	0	0
Prrc2c	5	0	0	0	0	0	1	0	0	1	0	0	0	1	0	1	0	0	0	1	0	0	0	0	0
Cul7	5	0	0	0	0	1	0	0	0	1	0	0	1	0	0	1	0	0	0	0	0	0	1	0	0
Xpo5	5	0	0	0	0	1	0	0	0	1	0	0	1	0	0	1	0	0	0	0	0	0	1	0	0
Mad2l1bp	5	0	0	0	0	1	0	0	0	1	0	0	1	0	0	1	0	0	0	0	0	0	1	0	0
Gm20517	5	0	0	0	0	1	0	0	0	1	0	0	1	0	0	1	0	0	0	0	0	0	1	0	0
Serbp1	5	1	0	0	1	1	0	0	0	0	0	0	0	0	0	0	0	0	0	0	0	0	1	0	1
Naa16	5	0	1	1	0	0	0	0	0	1	1	0	1	0	0	0	0	0	0	0	0	0	0	0	0
Acad9	5	0	0	0	0	0	0	0	0	1	0	0	0	1	0	1	0	1	0	1	0	0	0	0	0
2310039H08Rik	5	0	0	0	0	1	0	0	0	1	0	0	1	0	0	1	0	0	0	0	0	0	1	0	0
Sclt1	5	0	0	0	0	0	0	0	0	1	0	0	0	1	1	1	0	0	0	1	0	0	0	0	0
Arl8b	5	0	1	0	0	1	1	0	0	0	0	0	0	0	0	1	0	0	0	0	0	0	1	0	0
Lpar6	5	0	1	1	0	0	0	0	0	1	1	0	1	0	0	0	0	0	0	0	0	0	0	0	0
Pigc	5	0	0	0	0	0	1	0	0	1	0	0	0	1	0	1	0	0	0	1	0	0	0	0	0
Socs4	5	0	0	0	0	0	1	0	0	1	1	0	1	0	0	0	0	0	0	1	0	0	0	0	0
Zc3h13	5	0	1	1	0	0	0	0	0	1	1	0	1	0	0	0	0	0	0	0	0	0	0	0	0
Larp1b	5	0	0	0	0	0	0	0	0	1	0	0	0	1	1	1	0	0	0	1	0	0	0	0	0
Med4	5	0	1	1	0	0	0	0	0	1	1	0	1	0	0	0	0	0	0	0	0	0	0	0	0
Gpalpp1	5	0	1	1	0	0	0	0	0	1	1	0	1	0	0	0	0	0	0	0	0	0	0	0	0
Kctd4	5	0	1	1	0	0	0	0	0	1	1	0	1	0	0	0	0	0	0	0	0	0	0	0	0
Slc25a30	5	0	1	1	0	0	0	0	0	1	1	0	1	0	0	0	0	0	0	0	0	0	0	0	0
4930523C07Rik	5	0	0	0	0	0	1	0	0	1	0	0	0	1	0	1	0	0	0	1	0	0	0	0	0
Mgarp	5	0	0	0	0	0	0	0	0	1	0	0	0	1	1	1	0	0	0	1	0	0	0	0	0
Epsti1	5	0	1	1	0	0	0	0	0	1	1	0	1	0	0	0	0	0	0	0	0	0	0	0	0
Spert	5	0	1	1	0	0	0	0	0	1	1	0	1	0	0	0	0	0	0	0	0	0	0	0	0
Sugt1	5	0	1	1	0	0	0	0	0	1	1	0	1	0	0	0	0	0	0	0	0	0	0	0	0
Gm21981	5	0	0	0	0	1	0	0	0	1	0	0	1	0	0	1	0	0	0	0	0	0	1	0	0
Abhd18	5	0	0	0	0	0	0	0	0	1	0	0	0	1	1	1	0	0	0	1	0	0	0	0	0
1700067P10Rik	5	0	0	0	0	1	0	0	0	1	0	0	1	0	0	1	0	0	0	0	0	0	1	0	0
Mrps18a	5	0	0	0	0	1	0	0	0	1	0	0	1	0	0	1	0	0	0	0	0	0	1	0	0
Gtf2f2	5	0	1	1	0	0	0	0	0	1	1	0	1	0	0	0	0	0	0	0	0	0	0	0	0
Elf2	5	0	0	0	0	0	0	0	0	1	0	0	0	1	1	1	0	0	0	1	0	0	0	0	0
Fmo2	5	0	0	0	0	0	1	0	0	1	0	0	0	1	0	1	0	0	0	1	0	0	0	0	0
Rcbtb2	5	0	1	1	0	0	0	0	0	1	1	0	1	0	0	0	0	0	0	0	0	0	0	0	0
Mettl18	5	0	0	0	0	0	1	0	0	1	0	0	0	1	0	1	0	0	0	1	0	0	0	0	0
Tspo2	5	0	0	0	0	1	0	0	0	1	0	0	1	0	0	1	0	0	0	0	0	0	1	0	0
Cysltr2	5	0	1	1	0	0	0	0	0	1	1	0	1	0	0	0	0	0	0	0	0	0	0	0	0
Csnk1g3	5	0	0	0	0	0	0	0	0	1	1	0	1	0	0	0	1	0	0	0	0	0	0	1	0
Cenpl	5	0	0	0	0	0	1	0	0	1	0	0	0	1	0	1	0	0	0	1	0	0	0	0	0
Lrfn2	5	0	0	0	0	1	0	0	0	1	0	0	1	0	0	1	0	0	0	0	0	0	1	0	0
Clic5	5	0	0	0	0	1	0	0	0	1	0	0	1	0	0	1	0	0	0	0	0	0	1	0	0
Pgrmc2	5	0	0	0	0	0	0	0	0	1	0	0	0	1	1	1	0	0	0	1	0	0	0	0	0
Lrrc63	5	0	1	1	0	0	0	0	0	1	1	0	1	0	0	0	0	0	0	0	0	0	0	0	0
Spata16	5	0	0	0	1	1	0	0	0	0	0	0	0	0	0	0	0	1	0	0	0	0	1	0	1
Spats1	5	0	0	0	0	1	0	0	0	1	0	0	1	0	0	1	0	0	0	0	0	0	1	0	0
Ccdc122	5	0	1	1	0	0	0	0	0	1	1	0	1	0	0	0	0	0	0	0	0	0	0	0	0
Mad2l1	5	1	0	0	1	1	0	0	0	0	0	0	0	0	0	0	0	0	0	0	0	0	1	0	1
Treml1	5	0	0	0	0	1	0	0	0	1	0	0	1	0	0	1	0	0	0	0	0	0	1	0	0
Mettl13	5	0	0	0	0	0	1	0	0	1	0	0	0	1	0	1	0	0	0	1	0	0	0	0	0
Ptk7	5	0	0	0	0	1	0	0	0	1	0	0	1	0	0	1	0	0	0	0	0	0	1	0	0
Bbs7	5	0	0	0	0	0	0	0	0	1	0	0	0	1	0	1	0	1	0	1	0	0	0	0	0
Cdc5l	5	0	0	0	0	1	0	0	0	1	0	0	1	0	0	1	0	0	0	0	0	0	1	0	0
Vwa8	5	0	1	1	0	0	0	0	0	1	1	0	1	0	0	0	0	0	0	0	0	0	0	0	0
Fndc3b	5	0	0	0	1	1	0	0	0	0	0	0	0	0	0	0	0	1	0	0	0	0	1	0	1
Cnpy3	5	0	0	0	0	1	0	0	0	1	0	0	1	0	0	1	0	0	0	0	0	0	1	0	0
Mccc1	5	0	0	0	0	0	0	0	0	1	0	0	0	1	0	1	0	1	0	1	0	0	0	0	0
Mfsd8	5	0	0	0	0	0	0	0	0	1	0	0	0	1	1	1	0	0	0	1	0	0	0	0	0
1600014C23Rik	5	0	0	0	0	1	0	0	0	1	0	0	1	0	0	1	0	0	0	0	0	0	1	0	0
1810062G17Rik	5	0	0	0	0	0	0	0	0	1	0	0	0	1	0	1	0	1	0	1	0	0	0	0	0
Acbd6	5	0	0	0	0	0	0	0	0	1	0	0	1	1	0	1	0	0	0	1	0	0	0	0	0
Serp2	5	0	1	1	0	0	0	0	0	1	1	0	1	0	0	0	0	0	0	0	0	0	0	0	0
Angptl1	5	0	0	0	0	0	0	0	0	1	0	0	1	1	0	1	0	0	0	1	0	0	0	0	0
Tbcc	5	0	0	0	0	1	0	0	0	1	0	0	1	0	0	1	0	0	0	0	0	0	1	0	0
Pcdh18	5	0	0	0	0	0	0	0	0	1	0	0	0	1	1	1	0	0	0	1	0	0	0	0	0
Ptchd4	5	1	0	0	0	1	0	0	0	1	0	0	0	0	0	1	0	0	0	0	0	0	1	0	0
Setd7	5	0	0	0	0	0	0	0	0	1	0	0	0	1	1	1	0	0	0	1	0	0	0	0	0
1700034I23Rik	5	0	0	0	0	0	0	0	0	1	0	0	0	1	1	1	0	0	0	1	0	0	0	0	0
Slc25a31	5	0	0	0	0	0	0	0	0	1	0	0	0	1	1	1	0	0	0	1	0	0	0	0	0
Tex35	5	0	0	0	0	0	0	0	0	1	0	0	1	1	0	1	0	0	0	1	0	0	0	0	0
Slc35b2	5	0	0	0	0	1	0	0	0	1	0	0	1	0	0	1	0	0	0	0	0	0	1	0	0
Ankrd45	5	0	0	0	0	0	1	0	0	1	0	0	0	1	0	1	0	0	0	1	0	0	0	0	0
Cep350	5	0	0	0	0	0	0	0	0	1	0	0	1	1	0	1	0	0	0	1	0	0	0	0	0
Tjap1	5	0	0	0	0	1	0	0	0	1	0	0	1	0	0	1	0	0	0	0	0	0	1	0	0
Foxp4	5	0	0	0	0	1	0	0	0	1	0	0	1	0	0	1	0	0	0	0	0	0	1	0	0
Scyl3	5	0	0	0	0	0	1	0	0	1	0	0	0	1	0	1	0	0	0	1	0	0	0	0	0
Tex37	5	1	0	0	1	1	0	0	0	0	0	0	0	0	0	0	0	0	0	0	0	0	1	0	1
Cxxc1	5	1	0	1	0	0	1	0	0	0	0	1	0	0	0	0	0	0	0	0	0	1	0	0	0
Samd4	5	0	0	0	0	0	1	0	0	1	1	0	1	0	0	0	0	0	0	1	0	0	0	0	0
Setmar	5	0	1	0	0	1	0	0	0	0	0	0	0	0	0	1	0	0	0	0	0	0	1	1	0
Klc4	5	0	0	0	0	1	0	0	0	1	0	0	1	0	0	1	0	0	0	0	0	0	1	0	0
4930503L19Rik	5	1	0	1	0	0	1	0	0	0	0	1	0	0	0	0	0	0	0	0	0	1	0	0	0
Naa15	5	0	0	0	0	0	0	0	0	1	0	0	0	1	1	1	0	0	0	1	0	0	0	0	0
Ccdc181	5	0	0	0	0	0	1	0	0	1	0	0	0	1	0	1	0	0	0	1	0	0	0	0	0
Tex50	5	0	0	0	0	0	1	0	0	1	0	0	0	1	0	1	0	0	0	1	0	0	0	0	0
AY358078	5	0	0	0	0	0	1	0	0	1	1	0	1	0	0	0	0	0	0	1	0	0	0	0	0
Erich6b	5	0	1	1	0	0	0	0	0	1	1	0	1	0	0	0	0	0	0	0	0	0	0	0	0
4930558K02Rik	5	0	0	0	0	0	1	0	0	1	0	0	0	1	0	1	0	0	0	1	0	0	0	0	0
1700001C19Rik	5	0	0	0	0	1	0	0	0	1	0	0	1	0	0	1	0	0	0	0	0	0	1	0	0
Igkv4-74	5	1	0	0	1	1	0	0	0	0	0	0	0	0	0	0	0	0	0	0	0	0	1	0	1
Rsph9	5	0	0	0	0	1	0	0	0	1	0	0	1	0	0	1	0	0	0	0	0	0	1	0	0
Dynap	5	1	0	1	0	0	1	0	0	0	0	1	0	0	0	0	0	0	0	0	0	1	0	0	0
Treml4	5	0	0	0	0	1	0	0	0	1	0	0	1	0	0	1	0	0	0	0	0	0	1	0	0
Daam2	5	0	0	0	0	1	0	0	0	1	0	0	1	0	0	1	0	0	0	0	0	0	1	0	0
Supt3	5	0	0	0	0	1	0	0	0	1	0	0	1	0	0	1	0	0	0	0	0	0	1	0	0
Unc5cl	5	0	0	0	0	1	0	0	0	1	0	0	1	0	0	1	0	0	0	0	0	0	1	0	0
1700122O11Rik	5	0	0	0	0	1	0	0	0	1	0	0	1	0	0	1	0	0	0	0	0	0	1	0	0
Ear10	5	0	0	0	0	0	1	0	0	1	1	0	1	0	0	0	0	0	0	1	0	0	0	0	0
Adgrf1	5	1	0	0	0	1	0	0	0	1	0	0	0	0	0	1	0	0	0	0	0	0	1	0	0
Adgrf4	5	1	0	0	0	1	0	0	0	1	0	0	0	0	0	1	0	0	0	0	0	0	1	0	0
Ralgps2	5	0	0	0	0	0	0	0	0	1	0	0	1	1	0	1	0	0	0	1	0	0	0	0	0
Mroh9	5	0	0	0	0	0	1	0	0	1	0	0	0	1	0	1	0	0	0	1	0	0	0	0	0
Cul9	5	0	0	0	0	1	0	0	0	1	0	0	1	0	0	1	0	0	0	0	0	0	1	0	0
Igkv1-35	5	1	0	0	1	1	0	0	0	0	0	0	0	0	0	0	0	0	0	0	0	0	1	0	1
Jade1	5	0	0	0	0	0	0	0	0	1	0	0	0	1	1	1	0	0	0	1	0	0	0	0	0
Fbxo34	5	0	0	0	0	0	1	0	0	1	1	0	1	0	0	0	0	0	0	1	0	0	0	0	0
Rab27b	5	1	0	1	0	0	1	0	0	0	0	1	0	0	0	0	0	0	0	0	0	1	0	0	0
Cfap53	5	1	0	1	0	0	1	0	0	0	0	1	0	0	0	0	0	0	0	0	0	1	0	0	0
Enpp5	5	0	0	0	0	1	0	0	0	1	0	0	1	0	0	1	0	0	0	0	0	0	1	0	0
Peli2	5	0	0	0	0	0	1	0	0	1	1	0	1	0	0	0	0	0	0	1	0	0	0	0	0
Igkv4-71	5	1	0	0	1	1	0	0	0	0	0	0	0	0	0	0	0	0	0	0	0	0	1	0	1
Frs3	5	0	0	0	0	1	0	0	0	1	0	0	1	0	0	1	0	0	0	0	0	0	1	0	0
Gm8127	5	0	0	0	0	0	1	0	0	1	1	0	1	0	0	0	0	0	0	1	0	0	0	0	0
Gm2000	5	0	0	0	0	0	0	0	0	1	0	0	1	1	0	1	0	0	0	1	0	0	0	0	0
Gorab	5	0	0	0	0	0	1	0	0	1	0	0	0	1	0	1	0	0	0	1	0	0	0	0	0
Suco	5	0	0	0	0	0	1	0	0	1	0	0	0	1	0	1	0	0	0	1	0	0	0	0	0
Ankrd50	5	0	0	0	0	0	0	0	0	1	0	0	0	1	0	1	0	1	0	1	0	0	0	0	0
Zfp957	5	0	1	1	0	0	0	0	0	1	1	0	1	0	0	0	0	0	0	0	0	0	0	0	0
Fam216b	5	0	1	1	0	0	0	0	0	1	1	0	1	0	0	0	0	0	0	0	0	0	0	0	0
Oard1	5	0	0	0	0	1	0	0	0	1	0	0	1	0	0	1	0	0	0	0	0	0	1	0	0
Dlk2	5	0	0	0	0	1	0	0	0	1	0	0	1	0	0	1	0	0	0	0	0	0	1	0	0
AI661453	5	0	0	0	0	1	0	0	0	1	0	0	1	0	0	1	0	0	0	0	0	0	1	0	0
Ttbk1	5	0	0	0	0	1	0	0	0	1	0	0	1	0	0	1	0	0	0	0	0	0	1	0	0
Treml2	5	0	0	0	0	1	0	0	0	1	0	0	1	0	0	1	0	0	0	0	0	0	1	0	0
Cep120	5	0	0	0	0	0	0	0	0	1	1	0	1	0	0	0	1	0	0	0	0	0	0	1	0
Me2	5	1	0	1	0	0	1	0	0	0	0	1	0	0	0	0	0	0	0	0	0	1	0	0	0
Sec16b	5	0	0	0	0	0	0	0	0	1	0	0	1	1	0	1	0	0	0	1	0	0	0	0	0
Med20	5	0	0	0	0	1	0	0	0	1	0	0	1	0	0	1	0	0	0	0	0	0	1	0	0
Elac1	5	1	0	1	0	0	1	0	0	0	0	1	0	0	0	0	0	0	0	0	0	1	0	0	0
Tnfrsf21	5	1	0	0	0	1	0	0	0	1	0	0	0	0	0	1	0	0	0	0	0	0	1	0	0
Slc19a2	5	0	0	0	0	0	1	0	0	1	0	0	0	1	0	1	0	0	0	1	0	0	0	0	0
Crip3	5	0	0	0	0	1	0	0	0	1	0	0	1	0	0	1	0	0	0	0	0	0	1	0	0
Polh	5	0	0	0	0	1	0	0	0	1	0	0	1	0	0	1	0	0	0	0	0	0	1	0	0
Stard6	5	1	0	1	0	0	1	0	0	0	0	1	0	0	0	0	0	0	0	0	0	1	0	0	0
Nphs2	5	0	0	0	0	0	0	0	0	1	0	0	1	1	0	1	0	0	0	1	0	0	0	0	0
Vmn1r37	5	1	0	0	1	1	0	0	0	0	0	0	0	0	0	0	0	0	0	0	0	0	1	0	1
Vmn1r32	5	1	0	0	1	1	0	0	0	0	0	0	0	0	0	0	0	0	0	0	0	0	1	0	1
Nlgn1	5	0	0	0	1	1	0	0	0	0	0	0	0	0	0	0	0	1	0	0	0	0	1	0	1
Edem1	5	0	1	0	0	1	1	0	0	0	0	0	0	0	0	1	0	0	0	0	0	0	1	0	0
Dlgap5	5	0	0	0	0	0	1	0	0	1	1	0	1	0	0	0	0	0	0	1	0	0	0	0	0
Il23r	5	1	0	0	1	1	0	0	0	0	0	0	0	0	0	0	0	0	0	0	0	0	1	0	1
Mtrf1	5	0	1	1	0	0	0	0	0	1	1	0	1	0	0	0	0	0	0	0	0	0	0	0	0
Ppp2r5d	5	0	0	0	0	1	0	0	0	1	0	0	1	0	0	1	0	0	0	0	0	0	1	0	0
Abcc10	5	0	0	0	0	1	0	0	0	1	0	0	1	0	0	1	0	0	0	0	0	0	1	0	0
Maml3	5	0	0	0	0	0	0	0	0	1	0	0	0	1	1	1	0	0	0	1	0	0	0	0	0
Fmo4	5	0	0	0	0	0	1	0	0	1	0	0	0	1	0	1	0	0	0	1	0	0	0	0	0
Pex6	5	0	0	0	0	1	0	0	0	1	0	0	1	0	0	1	0	0	0	0	0	0	1	0	0
Igkv12-46	5	1	0	0	1	1	0	0	0	0	0	0	0	0	0	0	0	0	0	0	0	0	1	0	1
Ghsr	5	0	0	0	1	1	0	0	0	0	0	0	0	0	0	0	0	1	0	0	0	0	1	0	1
Zfp608	5	0	0	0	0	0	0	0	0	1	1	0	1	0	0	0	1	0	0	0	0	0	0	1	0
Dars2	5	0	0	0	0	0	1	0	0	1	0	0	0	1	0	1	0	0	0	1	0	0	0	0	0
Igkv4-80	5	1	0	0	1	1	0	0	0	0	0	0	0	0	0	0	0	0	0	0	0	0	1	0	1
Brinp3	5	0	0	0	0	0	0	0	0	1	0	0	0	1	0	1	0	0	0	1	0	0	0	1	0
Nceh1	5	0	0	0	1	1	0	0	0	0	0	0	0	0	0	0	0	1	0	0	0	0	1	0	1
Nudt15	5	0	1	1	0	0	0	0	0	1	1	0	1	0	0	0	0	0	0	0	0	0	0	0	0
Lrch1	5	0	1	1	0	0	0	0	0	1	1	0	1	0	0	0	0	0	0	0	0	0	0	0	0
B430306N03Rik	5	0	0	0	0	1	0	0	0	1	0	0	1	0	0	1	0	0	0	0	0	0	1	0	0
Wdhd1	5	0	0	0	0	0	1	0	0	1	1	0	1	0	0	0	0	0	0	1	0	0	0	0	0
Intu	5	0	0	0	0	0	0	0	0	1	0	0	0	1	1	1	0	0	0	1	0	0	0	0	0
Rasal2	5	0	0	0	0	0	0	0	0	1	0	0	1	1	0	1	0	0	0	1	0	0	0	0	0
Fam20b	5	0	0	0	0	0	0	0	0	1	0	0	1	1	0	1	0	0	0	1	0	0	0	0	0
Mapk1ip1l	5	0	0	0	0	0	1	0	0	1	1	0	1	0	0	0	0	0	0	1	0	0	0	0	0
Dgkh	5	0	1	1	0	0	0	0	0	1	1	0	1	0	0	0	0	0	0	0	0	0	0	0	0
Zbtb37	5	0	0	0	0	0	1	0	0	1	0	0	0	1	0	1	0	0	0	1	0	0	0	0	0
Mapk4	5	1	0	1	0	0	1	0	0	0	0	1	0	0	0	0	0	0	0	0	0	1	0	0	0
4932438A13Rik	5	0	0	0	0	0	0	0	0	1	0	0	0	1	0	1	0	1	0	1	0	0	0	0	0
Klhl20	5	0	0	0	0	0	1	0	0	1	0	0	0	1	0	1	0	0	0	1	0	0	0	0	0
Enox1	5	0	1	1	0	0	0	0	0	1	1	0	1	0	0	0	0	0	0	0	0	0	0	0	0
Lacc1	5	0	1	1	0	0	0	0	0	1	1	0	1	0	0	0	0	0	0	0	0	0	0	0	0
Igkv8-26	5	1	0	0	1	1	0	0	0	0	0	0	0	0	0	0	0	0	0	0	0	0	1	0	1
Nme7	5	0	0	0	0	0	1	0	0	1	0	0	0	1	0	1	0	0	0	1	0	0	0	0	0
Igkv2-137	5	1	0	0	1	1	0	0	0	0	0	0	0	0	0	0	0	0	0	0	0	0	1	0	1
Cog3	5	0	1	1	0	0	0	0	0	1	1	0	1	0	0	0	0	0	0	0	0	0	0	0	0
Mgst2	5	0	0	0	0	0	0	0	0	1	0	0	0	1	1	1	0	0	0	1	0	0	0	0	0
Klhdc3	5	0	0	0	0	1	0	0	0	1	0	0	1	0	0	1	0	0	0	0	0	0	1	0	0
Nudt6	5	0	0	0	0	0	0	0	0	1	0	0	0	1	0	1	0	1	0	1	0	0	0	0	0
Cryzl2	5	0	0	0	0	0	0	0	0	1	0	0	1	1	0	1	0	0	0	1	0	0	0	0	0
Mex3c	5	1	0	1	0	0	1	0	0	0	0	1	0	0	0	0	0	0	0	0	0	1	0	0	0
Tmem63b	5	0	0	0	0	1	0	0	0	1	0	0	1	0	0	1	0	0	0	0	0	0	1	0	0
Rrp36	5	0	0	0	0	1	0	0	0	1	0	0	1	0	0	1	0	0	0	0	0	0	1	0	0
Tnn	5	0	0	0	0	0	1	0	0	1	0	0	0	1	0	1	0	0	0	1	0	0	0	0	0
Tnfsf18	5	0	0	0	0	0	1	0	0	1	0	0	0	1	0	1	0	0	0	1	0	0	0	0	0
Bicral	5	0	0	0	0	1	0	0	0	1	0	0	1	0	0	1	0	0	0	0	0	0	1	0	0
Mir214	5	0	0	0	0	0	1	0	0	1	0	0	0	1	0	1	0	0	0	1	0	0	0	0	0
Qrfpr	5	0	0	0	0	0	0	0	0	1	0	0	0	1	0	1	0	1	0	1	0	0	0	0	0
Opn5	5	1	0	0	0	1	0	0	0	1	0	0	0	0	0	1	0	0	0	0	0	0	1	0	0
Enpp4	5	0	0	0	0	1	0	0	0	1	0	0	1	0	0	1	0	0	0	0	0	0	1	0	0
Ccdc144b	5	0	0	0	0	0	0	0	0	1	0	0	0	1	0	1	0	1	0	1	0	0	0	0	0
Akap11	5	0	1	1	0	0	0	0	0	1	1	0	1	0	0	0	0	0	0	0	0	0	0	0	0
Cetn4	5	0	0	0	0	0	0	0	0	1	0	0	0	1	0	1	0	1	0	1	0	0	0	0	0
Pcdh17	5	0	1	1	0	0	0	0	0	1	1	0	1	0	0	0	0	0	0	0	0	0	0	0	0
Lrrc73	5	0	0	0	0	1	0	0	0	1	0	0	1	0	0	1	0	0	0	0	0	0	1	0	0
Tdrd5	5	0	0	0	0	0	0	0	0	1	0	0	1	1	0	1	0	0	0	1	0	0	0	0	0
Igkv4-57	5	1	0	0	1	1	0	0	0	0	0	0	0	0	0	0	0	0	0	0	0	0	1	0	1
Igkv4-79	5	1	0	0	1	1	0	0	0	0	0	0	0	0	0	0	0	0	0	0	0	0	1	0	1
Mettl11b	5	0	0	0	0	0	1	0	0	1	0	0	0	1	0	1	0	0	0	1	0	0	0	0	0
Kbtbd7	5	0	1	1	0	0	0	0	0	1	1	0	1	0	0	0	0	0	0	0	0	0	0	0	0
Olfm4	5	0	1	1	0	0	0	0	0	1	1	0	1	0	0	0	0	0	0	0	0	0	0	0	0
Tmem151b	5	0	0	0	0	1	0	0	0	1	0	0	1	0	0	1	0	0	0	0	0	0	1	0	0
Igkv4-86	5	1	0	0	1	1	0	0	0	0	0	0	0	0	0	0	0	0	0	0	0	0	1	0	1
Igkv4-81	5	1	0	0	1	1	0	0	0	0	0	0	0	0	0	0	0	0	0	0	0	0	1	0	1
Usp49	5	0	0	0	0	1	0	0	0	1	0	0	1	0	0	1	0	0	0	0	0	0	1	0	0
Rc3h1	5	0	0	0	0	0	1	0	0	1	0	0	0	1	0	1	0	0	0	1	0	0	0	0	0
Tmem212	5	0	0	0	1	1	0	0	0	0	0	0	0	0	0	0	0	1	0	0	0	0	1	0	1
Rubcnl	5	0	1	1	0	0	0	0	0	1	1	0	1	0	0	0	0	0	0	0	0	0	0	0	0
Siah3	5	0	1	1	0	0	0	0	0	1	1	0	1	0	0	0	0	0	0	0	0	0	0	0	0
Prickle4	5	0	0	0	0	1	0	0	0	1	0	0	1	0	0	1	0	0	0	0	0	0	1	0	0
Naaladl2	5	0	0	0	1	1	0	0	0	0	0	0	0	0	0	0	0	1	0	0	0	0	1	0	1
Igkv16-104	5	1	0	0	1	1	0	0	0	0	0	0	0	0	0	0	0	0	0	0	0	0	1	0	1
Igkv4-50	5	1	0	0	1	1	0	0	0	0	0	0	0	0	0	0	0	0	0	0	0	0	1	0	1
Igkv4-58	5	1	0	0	1	1	0	0	0	0	0	0	0	0	0	0	0	0	0	0	0	0	1	0	1
Igkv4-92	5	1	0	0	1	1	0	0	0	0	0	0	0	0	0	0	0	0	0	0	0	0	1	0	1
Igkv5-39	5	1	0	0	1	1	0	0	0	0	0	0	0	0	0	0	0	0	0	0	0	0	1	0	1
Igkv5-37	5	1	0	0	1	1	0	0	0	0	0	0	0	0	0	0	0	0	0	0	0	0	1	0	1
Igkv4-57-1	5	1	0	0	1	1	0	0	0	0	0	0	0	0	0	0	0	0	0	0	0	0	1	0	1
Igkv4-68	5	1	0	0	1	1	0	0	0	0	0	0	0	0	0	0	0	0	0	0	0	0	1	0	1
Igkv4-53	5	1	0	0	1	1	0	0	0	0	0	0	0	0	0	0	0	0	0	0	0	0	1	0	1
Igkv4-72	5	1	0	0	1	1	0	0	0	0	0	0	0	0	0	0	0	0	0	0	0	0	1	0	1
Igkv4-70	5	1	0	0	1	1	0	0	0	0	0	0	0	0	0	0	0	0	0	0	0	0	1	0	1
Bbs12	5	0	0	0	0	0	0	0	0	1	0	0	0	1	0	1	0	1	0	1	0	0	0	0	0
Aars2	5	0	0	0	0	1	0	0	0	1	0	0	1	0	0	1	0	0	0	0	0	0	1	0	0
Thnsl2	5	1	0	0	1	1	0	0	0	0	0	0	0	0	0	0	0	0	0	0	0	0	1	0	1
Dnph1	5	0	0	0	0	1	0	0	0	1	0	0	1	0	0	1	0	0	0	0	0	0	1	0	0
Adgrf5	5	1	0	0	0	1	0	0	0	1	0	0	0	0	0	1	0	0	0	0	0	0	1	0	0
Adgrf2	5	1	0	0	0	1	0	0	0	1	0	0	0	0	0	1	0	0	0	0	0	0	1	0	0
Pappa2	5	0	0	0	0	0	1	0	0	1	0	0	0	1	0	1	0	0	0	1	0	0	0	0	0
Foxi3	5	1	0	0	1	1	0	0	0	0	0	0	0	0	0	0	0	0	0	0	0	0	1	0	1
Igkv9-129	5	1	0	0	1	1	0	0	0	0	0	0	0	0	0	0	0	0	0	0	0	0	1	0	1
Fmo6	5	0	0	0	0	0	1	0	0	1	0	0	0	1	0	1	0	0	0	1	0	0	0	0	0
Tor1aip1	5	0	0	0	0	0	0	0	0	1	0	0	1	1	0	1	0	0	0	1	0	0	0	0	0
Tor1aip2	5	0	0	0	0	0	0	0	0	1	0	0	1	1	0	1	0	0	0	1	0	0	0	0	0
BC055324	5	0	0	0	0	0	1	0	0	1	0	0	0	1	0	1	0	0	0	1	0	0	0	0	0
9830107B12Rik	5	0	0	0	0	1	0	0	0	1	0	0	1	0	0	1	0	0	0	0	0	0	1	0	0
Ccdc68	5	1	0	1	0	0	1	0	0	0	0	1	0	0	0	0	0	0	0	0	0	1	0	0	0
Mir199a-2	5	0	0	0	0	0	1	0	0	1	0	0	0	1	0	1	0	0	0	1	0	0	0	0	0
Fam163a	5	0	0	0	0	0	0	0	0	1	0	0	1	1	0	1	0	0	0	1	0	0	0	0	0
Igkv6-32	5	1	0	0	1	1	0	0	0	0	0	0	0	0	0	0	0	0	0	0	0	0	1	0	1
Gm9925	5	1	0	1	0	0	1	0	0	0	0	1	0	0	0	0	0	0	0	0	0	1	0	0	0
Igkv8-30	5	1	0	0	1	1	0	0	0	0	0	0	0	0	0	0	0	0	0	0	0	0	1	0	1
Igkv8-28	5	1	0	0	1	1	0	0	0	0	0	0	0	0	0	0	0	0	0	0	0	0	1	0	1
Igkv4-91	5	1	0	0	1	1	0	0	0	0	0	0	0	0	0	0	0	0	0	0	0	0	1	0	1
Gm42543	5	1	0	0	1	1	0	0	0	0	0	0	0	0	0	0	0	0	0	0	0	0	1	0	1
Igkv2-109	5	1	0	0	1	1	0	0	0	0	0	0	0	0	0	0	0	0	0	0	0	0	1	0	1
Myocos	5	0	0	0	0	0	1	0	0	1	0	0	0	1	0	1	0	0	0	1	0	0	0	0	0
Igkv5-48	5	1	0	0	1	1	0	0	0	0	0	0	0	0	0	0	0	0	0	0	0	0	1	0	1
Kbtbd6	5	0	1	1	0	0	0	0	0	1	1	0	1	0	0	0	0	0	0	0	0	0	0	0	0
Pabpc4l	5	0	0	0	0	0	0	0	0	1	0	0	0	1	1	1	0	0	0	1	0	0	0	0	0
Igkv14-126	5	1	0	0	1	1	0	0	0	0	0	0	0	0	0	0	0	0	0	0	0	0	1	0	1
Gm43218	5	1	0	0	1	1	0	0	0	0	0	0	0	0	0	0	0	0	0	0	0	0	1	0	1
Igkv4-62	5	1	0	0	1	1	0	0	0	0	0	0	0	0	0	0	0	0	0	0	0	0	1	0	1
Igkv9-123	5	1	0	0	1	1	0	0	0	0	0	0	0	0	0	0	0	0	0	0	0	0	1	0	1
Igkv10-95	5	1	0	0	1	1	0	0	0	0	0	0	0	0	0	0	0	0	0	0	0	0	1	0	1
Igkv2-112	5	1	0	0	1	1	0	0	0	0	0	0	0	0	0	0	0	0	0	0	0	0	1	0	1
Igkv4-63	5	1	0	0	1	1	0	0	0	0	0	0	0	0	0	0	0	0	0	0	0	0	1	0	1
Igkv1-131	5	1	0	0	1	1	0	0	0	0	0	0	0	0	0	0	0	0	0	0	0	0	1	0	1
Igkv14-130	5	1	0	0	1	1	0	0	0	0	0	0	0	0	0	0	0	0	0	0	0	0	1	0	1
Igkv10-94	5	1	0	0	1	1	0	0	0	0	0	0	0	0	0	0	0	0	0	0	0	0	1	0	1
Gm2042	5	0	1	0	0	0	0	0	0	1	1	0	1	1	0	0	0	0	0	0	0	0	0	0	0
Igkv4-59	5	1	0	0	1	1	0	0	0	0	0	0	0	0	0	0	0	0	0	0	0	0	1	0	1
Igkv17-127	5	1	0	0	1	1	0	0	0	0	0	0	0	0	0	0	0	0	0	0	0	0	1	0	1
Igkv9-124	5	1	0	0	1	1	0	0	0	0	0	0	0	0	0	0	0	0	0	0	0	0	1	0	1
Igkv1-135	5	1	0	0	1	1	0	0	0	0	0	0	0	0	0	0	0	0	0	0	0	0	1	0	1
Igkv17-121	5	1	0	0	1	1	0	0	0	0	0	0	0	0	0	0	0	0	0	0	0	0	1	0	1
Igkv1-133	5	1	0	0	1	1	0	0	0	0	0	0	0	0	0	0	0	0	0	0	0	0	1	0	1
Igkv4-69	5	1	0	0	1	1	0	0	0	0	0	0	0	0	0	0	0	0	0	0	0	0	1	0	1
Igkv1-132	5	1	0	0	1	1	0	0	0	0	0	0	0	0	0	0	0	0	0	0	0	0	1	0	1
Mymx	5	0	0	0	0	1	0	0	0	1	0	0	1	0	0	1	0	0	0	0	0	0	1	0	0
Gm11549	5	0	0	0	0	0	0	0	0	1	0	0	0	1	0	1	0	1	0	1	0	0	0	0	0
Scgb2b27	4	0	0	0	0	0	1	0	0	0	1	0	0	0	0	0	0	1	0	0	0	0	0	1	0
Acvr1	4	0	0	0	0	0	0	0	0	1	1	0	1	0	0	0	0	0	0	0	0	0	0	1	0
Agtr1b	4	0	0	0	1	1	0	0	0	0	0	0	0	0	0	0	0	0	0	0	0	0	1	0	1
Mat1a	4	0	0	0	0	0	1	0	0	1	0	0	1	0	0	0	0	0	0	1	0	0	0	0	0
Aplp1	4	0	0	0	0	0	1	0	0	0	1	0	0	0	0	0	0	1	0	0	0	0	0	1	0
Aprt	4	0	0	1	0	0	0	0	0	0	1	0	0	0	0	0	0	0	1	1	0	0	0	0	0
Atp4a	4	0	0	0	0	0	1	0	0	0	1	0	0	0	0	0	0	1	0	0	0	0	0	1	0
Bmp1	4	0	1	0	0	0	0	0	0	1	1	0	1	0	0	0	0	0	0	0	0	0	0	0	0
Bmp4	4	0	0	0	0	0	1	0	0	1	0	0	1	0	0	0	0	0	0	1	0	0	0	0	0
Capns1	4	0	0	0	0	0	1	0	0	0	1	0	0	0	0	0	0	1	0	0	0	0	0	1	0
Cd22	4	0	0	0	0	0	1	0	0	0	1	0	0	0	0	0	0	1	0	0	0	0	0	1	0
Vsx2	4	0	1	0	0	0	0	0	0	1	0	0	1	1	0	0	0	0	0	0	0	0	0	0	0
Col9a1	4	0	1	0	0	0	0	0	0	1	1	0	0	0	0	0	0	0	0	0	0	0	0	1	0
Cox4i1	4	0	0	1	0	0	0	0	0	0	1	0	0	0	0	0	0	0	1	1	0	0	0	0	0
Cox5b	4	0	1	1	0	0	0	0	0	1	1	0	0	0	0	0	0	0	0	0	0	0	0	0	0
Cp	4	0	0	0	1	1	0	0	0	0	0	0	0	0	0	0	0	0	0	0	0	0	1	0	1
Cpa3	4	0	0	0	1	1	0	0	0	0	0	0	0	0	0	0	0	0	0	0	0	0	1	0	1
Crh	4	0	0	0	1	1	0	0	0	0	0	0	0	0	0	0	0	0	0	0	0	0	1	0	1
Nudt19	4	0	0	0	0	0	1	0	0	0	1	0	0	0	0	0	0	1	0	0	0	0	0	1	0
Dpep1	4	0	0	1	0	0	0	0	0	0	1	0	0	0	0	0	0	0	1	1	0	0	0	0	0
Ebf1	4	0	0	0	0	0	0	0	1	0	1	0	1	0	0	0	0	0	0	0	1	0	0	0	0
Kcng2	4	1	0	0	0	0	1	0	0	0	0	1	1	0	0	0	0	0	0	0	0	0	0	0	0
Fos	4	0	1	0	0	0	0	0	0	1	0	0	1	1	0	0	0	0	0	0	0	0	0	0	0
Cidec	4	0	1	0	0	1	1	0	0	0	0	0	0	0	0	0	0	0	0	0	0	0	1	0	0
Gapdhs	4	0	0	0	0	0	1	0	0	0	1	0	0	0	0	0	0	1	0	0	0	0	0	1	0
Gpi1	4	0	0	0	0	0	1	0	0	0	1	0	0	0	0	0	0	1	0	0	0	0	0	1	0
Gm10376	4	0	0	0	0	0	1	0	0	1	0	0	1	0	0	0	0	0	0	1	0	0	0	0	0
Hr	4	0	1	0	0	0	0	0	0	1	1	0	1	0	0	0	0	0	0	0	0	0	0	0	0
Irf8	4	0	0	1	0	0	0	0	0	0	1	0	0	0	0	0	0	0	1	1	0	0	0	0	0
Il1r1	4	0	0	1	0	0	0	0	0	1	0	0	1	0	0	0	0	0	0	0	0	0	0	1	0
Il5ra	4	0	0	0	0	1	0	0	0	0	0	0	0	0	0	1	0	0	0	0	0	0	1	1	0
Itk	4	0	0	0	0	0	0	0	1	0	1	0	1	0	0	0	0	0	0	0	1	0	0	0	0
Mag	4	0	0	0	0	0	1	0	0	0	1	0	0	0	0	0	0	1	0	0	0	0	0	1	0
Mbl1	4	0	0	0	0	0	1	0	0	1	0	0	1	0	0	0	0	0	0	1	0	0	0	0	0
Mep1a	4	0	0	0	0	1	0	0	0	1	0	0	0	0	0	1	0	0	0	0	0	0	1	0	0
Mpo	4	0	1	1	0	0	0	0	0	1	0	0	1	0	0	0	0	0	0	0	0	0	0	0	0
Nkx2-6	4	0	1	0	0	0	0	0	0	1	1	0	1	0	0	0	0	0	0	0	0	0	0	0	0
Nkx3-1	4	0	1	0	0	0	0	0	0	1	1	0	1	0	0	0	0	0	0	0	0	0	0	0	0
Slc10a1	4	0	1	0	0	0	0	0	0	1	0	1	0	1	0	0	0	0	0	0	0	0	0	0	0
Pepd	4	0	0	0	0	0	1	0	0	0	1	0	0	0	0	0	0	1	0	0	0	0	0	1	0
Plcg2	4	0	0	1	0	0	0	0	0	0	1	0	0	0	0	0	0	0	1	1	0	0	0	0	0
Prim2	4	0	1	1	0	0	0	0	0	1	1	0	0	0	0	0	0	0	0	0	0	0	0	0	0
Ptger2	4	0	0	0	0	0	1	0	0	1	0	0	1	0	0	0	0	0	0	1	0	0	0	0	0
Scn1b	4	0	0	0	0	0	1	0	0	0	1	0	0	0	0	0	0	1	0	0	0	0	0	1	0
Srsf1	4	0	1	1	0	0	0	0	0	1	0	0	1	0	0	0	0	0	0	0	0	0	0	0	0
Srsf5	4	0	1	0	0	0	0	0	0	1	0	1	0	1	0	0	0	0	0	0	0	0	0	0	0
Il1rl1	4	0	0	1	0	0	0	0	0	1	0	0	1	0	0	0	0	0	0	0	0	0	0	1	0
Tgfb3	4	0	1	0	0	0	0	0	0	1	0	0	1	1	0	0	0	0	0	0	0	0	0	0	0
Upk1a	4	0	0	0	0	0	1	0	0	0	1	0	0	0	0	0	0	1	0	0	0	0	0	1	0
Zfp14	4	0	0	0	0	0	1	0	0	0	1	0	0	0	0	0	0	1	0	0	0	0	0	1	0
Zfp27	4	0	0	0	0	0	1	0	0	0	1	0	0	0	0	0	0	1	0	0	0	0	0	1	0
Zfp30	4	0	0	0	0	0	1	0	0	0	1	0	0	0	0	0	0	1	0	0	0	0	0	1	0
Etv2	4	0	0	0	0	0	1	0	0	0	1	0	0	0	0	0	0	1	0	0	0	0	0	1	0
Mc1r	4	0	0	1	0	0	0	0	0	0	1	0	0	0	0	0	0	0	1	1	0	0	0	0	0
Cebpa	4	0	0	0	0	0	1	0	0	0	1	0	0	0	0	0	0	1	0	0	0	0	0	1	0
Ltbp2	4	0	1	0	0	0	0	0	0	1	0	0	1	1	0	0	0	0	0	0	0	0	0	0	0
Cdh13	4	0	0	1	0	0	0	0	0	0	1	0	0	0	0	0	0	0	1	1	0	0	0	0	0
Zap70	4	0	1	1	0	0	0	0	0	1	1	0	0	0	0	0	0	0	0	0	0	0	0	0	0
Dmtn	4	0	1	0	0	0	0	0	0	1	1	0	1	0	0	0	0	0	0	0	0	0	0	0	0
Gpd2	4	0	0	0	0	0	0	0	0	1	1	0	1	0	0	0	0	0	0	0	0	0	0	1	0
Sec13	4	0	1	0	0	1	1	0	0	0	0	0	0	0	0	0	0	0	0	0	0	0	1	0	0
Rab23	4	0	1	1	0	0	0	0	0	1	1	0	0	0	0	0	0	0	0	0	0	0	0	0	0
Usf2	4	0	0	0	0	0	1	0	0	0	1	0	0	0	0	0	0	1	0	0	0	0	0	1	0
Ccser2	4	0	0	0	0	0	0	0	0	1	0	0	1	0	0	0	0	1	0	1	0	0	0	0	0
Car5a	4	0	0	1	0	0	0	0	0	0	1	0	0	0	0	0	0	0	1	1	0	0	0	0	0
Nfatc1	4	1	0	0	0	0	1	0	0	0	0	1	1	0	0	0	0	0	0	0	0	0	0	0	0
Gm10985	4	0	0	0	0	0	0	0	0	1	1	0	0	1	1	0	0	0	0	0	0	0	0	0	0
Pou3f3	4	0	0	1	0	0	0	0	0	1	0	0	1	0	0	0	0	0	0	0	0	0	0	1	0
Ptgdr	4	0	0	0	0	0	1	0	0	1	0	0	1	0	0	0	0	0	0	1	0	0	0	0	0
Gm6619	4	0	1	0	0	0	1	0	0	0	1	1	0	0	0	0	0	0	0	0	0	0	0	0	0
Gm6803	4	0	1	0	0	0	0	0	0	1	0	0	1	1	0	0	0	0	0	0	0	0	0	0	0
Vhl	4	0	1	0	0	1	1	0	0	0	0	0	0	0	0	0	0	0	0	0	0	0	1	0	0
Dst	4	0	1	1	0	0	0	0	0	1	1	0	0	0	0	0	0	0	0	0	0	0	0	0	0
Gm9611	4	0	0	0	0	0	1	0	0	1	0	0	1	0	0	0	0	0	0	1	0	0	0	0	0
Akap1	4	0	1	1	0	0	0	0	0	1	0	0	1	0	0	0	0	0	0	0	0	0	0	0	0
Adam4	4	0	1	0	0	0	0	0	0	1	0	0	1	1	0	0	0	0	0	0	0	0	0	0	0
Kcnj3	4	0	0	0	0	0	0	0	0	1	1	0	1	0	0	0	0	0	0	0	0	0	0	1	0
Gm2035	4	0	1	0	0	0	0	0	0	1	0	0	1	1	0	0	0	0	0	0	0	0	0	0	0
Cebpg	4	0	0	0	0	0	1	0	0	0	1	0	0	0	0	0	0	1	0	0	0	0	0	1	0
Slc9a4	4	0	0	1	0	0	0	0	0	1	0	0	1	0	0	0	0	0	0	0	0	0	0	1	0
Slc9a2	4	0	0	1	0	0	0	0	0	1	0	0	1	0	0	0	0	0	0	0	0	0	0	1	0
Pgf	4	0	1	0	0	0	0	0	0	1	0	0	1	1	0	0	0	0	0	0	0	0	0	0	0
Atp2b2	4	0	1	0	0	1	1	0	0	0	0	0	0	0	0	0	0	0	0	0	0	0	1	0	0
Adam19	4	0	0	0	0	0	0	0	1	0	1	0	1	0	0	0	0	0	0	0	1	0	0	0	0
Il18r1	4	0	0	1	0	0	0	0	0	1	0	0	1	0	0	0	0	0	0	0	0	0	0	1	0
Gramd1a	4	0	0	0	0	0	1	0	0	0	1	0	0	0	0	0	0	1	0	0	0	0	0	1	0
Rpl13	4	0	0	1	0	0	0	0	0	0	1	0	0	0	0	0	0	0	1	1	0	0	0	0	0
Adam28	4	0	1	0	0	0	0	0	0	1	1	0	1	0	0	0	0	0	0	0	0	0	0	0	0
Lrrn1	4	0	0	0	0	1	0	0	0	0	0	0	0	0	0	1	0	0	0	0	0	0	1	1	0
Gm3015	4	0	0	0	0	0	1	0	0	1	0	0	1	0	0	0	0	0	0	1	0	0	0	0	0
Gm3072	4	0	0	0	0	0	1	0	0	1	0	0	1	0	0	0	0	0	0	1	0	0	0	0	0
Imp4	4	0	1	1	0	0	0	0	0	1	1	0	0	0	0	0	0	0	0	0	0	0	0	0	0
Cnot11	4	0	1	1	0	0	0	0	0	1	1	0	0	0	0	0	0	0	0	0	0	0	0	0	0
Myo5b	4	1	0	0	0	0	1	0	0	0	0	1	0	0	0	0	0	0	0	0	0	1	0	0	0
Cdh15	4	0	0	1	0	0	0	0	0	0	1	0	0	0	0	0	0	0	1	1	0	0	0	0	0
Aff3	4	0	1	1	0	0	0	0	0	1	1	0	0	0	0	0	0	0	0	0	0	0	0	0	0
Ppp3cc	4	0	1	0	0	0	0	0	0	1	1	0	1	0	0	0	0	0	0	0	0	0	0	0	0
Gm3371	4	0	0	0	0	0	1	0	0	1	0	0	1	0	0	0	0	0	0	1	0	0	0	0	0
Adam7	4	0	1	0	0	0	0	0	0	1	1	0	1	0	0	0	0	0	0	0	0	0	0	0	0
Supt4a	4	0	1	1	0	0	0	0	0	1	0	0	1	0	0	0	0	0	0	0	0	0	0	0	0
Numb	4	0	1	0	0	0	0	0	0	1	0	0	1	1	0	0	0	0	0	0	0	0	0	0	0
Gm3573	4	0	0	0	0	0	1	0	0	1	0	0	1	0	0	0	0	0	0	1	0	0	0	0	0
Cox6b1	4	0	0	0	0	0	1	0	0	0	1	0	0	0	0	0	0	1	0	0	0	0	0	1	0
Gm3633	4	0	0	0	0	0	1	0	0	1	0	0	1	0	0	0	0	0	0	1	0	0	0	0	0
Fxyd3	4	0	0	0	0	0	1	0	0	0	1	0	0	0	0	0	0	1	0	0	0	0	0	1	0
Gm3676	4	0	0	0	0	0	1	0	0	1	0	0	1	0	0	0	0	0	0	1	0	0	0	0	0
Epx	4	0	1	1	0	0	0	0	0	1	0	0	1	0	0	0	0	0	0	0	0	0	0	0	0
Cav3	4	0	1	0	0	1	1	0	0	0	0	0	0	0	0	0	0	0	0	0	0	0	1	0	0
Zfp84	4	0	0	0	0	0	1	0	0	0	1	0	0	0	0	0	0	1	0	0	0	0	0	1	0
Zfp74	4	0	0	0	0	0	1	0	0	0	1	0	0	0	0	0	0	1	0	0	0	0	0	1	0
Tubb3	4	0	0	1	0	0	0	0	0	0	1	0	0	0	0	0	0	0	1	1	0	0	0	0	0
Slc8a3	4	0	1	0	0	0	0	0	0	1	0	0	1	1	0	0	0	0	0	0	0	0	0	0	0
Ccna1	4	0	0	0	0	0	0	0	0	1	1	0	0	1	1	0	0	0	0	0	0	0	0	0	0
Sptlc2	4	0	1	0	0	0	0	0	0	1	0	0	1	1	0	0	0	0	0	0	0	0	0	0	0
Scgb1b15	4	0	0	0	0	0	1	0	0	0	1	0	0	0	0	0	0	1	0	0	0	0	0	1	0
Ptpn18	4	0	1	1	0	0	0	0	0	1	1	0	0	0	0	0	0	0	0	0	0	0	0	0	0
Stc1	4	0	1	0	0	0	0	0	0	1	1	0	1	0	0	0	0	0	0	0	0	0	0	0	0
Oxtr	4	0	1	0	0	1	1	0	0	0	0	0	0	0	0	0	0	0	0	0	0	0	1	0	0
Npas2	4	0	1	1	0	0	0	0	0	1	1	0	0	0	0	0	0	0	0	0	0	0	0	0	0
Sema4c	4	0	1	1	0	0	0	0	0	1	1	0	0	0	0	0	0	0	0	0	0	0	0	0	0
Pkp4	4	0	0	0	0	0	0	0	0	1	1	0	1	0	0	0	0	0	0	0	0	0	0	1	0
Sall3	4	1	0	0	0	0	1	0	0	0	0	1	1	0	0	0	0	0	0	0	0	0	0	0	0
Cfc1	4	0	1	1	0	0	0	0	0	1	1	0	0	0	0	0	0	0	0	0	0	0	0	0	0
Sftpd	4	0	0	0	0	0	1	0	0	1	0	0	1	0	0	0	0	0	0	1	0	0	0	0	0
Sftpc	4	0	1	0	0	0	0	0	0	1	1	0	1	0	0	0	0	0	0	0	0	0	0	0	0
Sftpa1	4	0	0	0	0	0	1	0	0	1	0	0	1	0	0	0	0	0	0	1	0	0	0	0	0
Trpc4	4	0	0	0	0	0	0	0	0	1	1	0	0	1	1	0	0	0	0	0	0	0	0	0	0
Kmt2b	4	0	0	0	0	0	1	0	0	0	1	0	0	0	0	0	0	1	0	0	0	0	0	1	0
Taf1c	4	0	0	1	0	0	0	0	0	0	1	0	0	0	0	0	0	0	1	1	0	0	0	0	0
Sorbs3	4	0	1	0	0	0	0	0	0	1	1	0	1	0	0	0	0	0	0	0	0	0	0	0	0
1700049E17Rik2	4	0	0	0	0	0	1	0	0	1	0	0	1	0	0	0	0	0	0	1	0	0	0	0	0
Usp10	4	0	0	1	0	0	0	0	0	0	1	0	0	0	0	0	0	0	1	1	0	0	0	0	0
Zfpm1	4	0	0	1	0	0	0	0	0	0	1	0	0	0	0	0	0	0	1	1	0	0	0	0	0
Col19a1	4	0	1	0	0	0	0	0	0	1	1	0	0	0	0	0	0	0	0	0	0	0	0	1	0
Cntn4	4	0	0	0	0	1	0	0	0	0	0	0	0	0	0	1	0	0	0	0	0	0	1	1	0
Hsd17b2	4	0	0	1	0	0	0	0	0	0	1	0	0	0	0	0	0	0	1	1	0	0	0	0	0
Nrxn3	4	0	1	0	0	0	0	0	0	1	0	0	1	1	0	0	0	0	0	0	0	0	0	0	0
Ogg1	4	0	1	0	0	1	1	0	0	0	0	0	0	0	0	0	0	0	0	0	0	0	1	0	0
Gse1	4	0	0	1	0	0	0	0	0	0	1	0	0	0	0	0	0	0	1	1	0	0	0	0	0
Camk1	4	0	1	0	0	1	1	0	0	0	0	0	0	0	0	0	0	0	0	0	0	0	1	0	0
Acaa2	4	1	0	0	0	0	1	0	0	0	0	1	0	0	0	0	0	0	0	0	0	1	0	0	0
Gfra2	4	0	1	0	0	0	0	0	0	1	1	0	1	0	0	0	0	0	0	0	0	0	0	0	0
Tspan14	4	0	0	0	0	0	1	0	0	1	0	0	1	0	0	0	0	0	0	1	0	0	0	0	0
Hltf	4	0	0	0	1	1	0	0	0	0	0	0	0	0	0	0	0	0	0	0	0	0	1	0	1
Fndc3a	4	0	1	0	0	0	0	0	0	1	1	0	1	0	0	0	0	0	0	0	0	0	0	0	0
Hpn	4	0	0	0	0	0	1	0	0	0	1	0	0	0	0	0	0	1	0	0	0	0	0	1	0
Fxyd5	4	0	0	0	0	0	1	0	0	0	1	0	0	0	0	0	0	1	0	0	0	0	0	1	0
Gas8	4	0	0	1	0	0	0	0	0	0	1	0	0	0	0	0	0	0	1	1	0	0	0	0	0
Fgf17	4	0	1	0	0	0	0	0	0	1	1	0	1	0	0	0	0	0	0	0	0	0	0	0	0
Psen1	4	0	1	0	0	0	0	0	0	1	0	0	1	1	0	0	0	0	0	0	0	0	0	0	0
Gm16286	4	1	0	0	0	0	1	0	0	0	0	1	1	0	0	0	0	0	0	0	0	0	0	0	0
2020-09-04	4	0	1	1	0	0	0	0	0	1	0	0	1	0	0	0	0	0	0	0	0	0	0	0	0
Prss39	4	0	1	1	0	0	0	0	0	1	1	0	0	0	0	0	0	0	0	0	0	0	0	0	0
Prss40	4	0	1	1	0	0	0	0	0	1	1	0	0	0	0	0	0	0	0	0	0	0	0	0	0
Cnih1	4	0	0	0	0	0	1	0	0	1	0	0	1	0	0	0	0	0	0	1	0	0	0	0	0
Tyrobp	4	0	0	0	0	0	1	0	0	0	1	0	0	0	0	0	0	1	0	0	0	0	0	1	0
Thumpd3	4	0	1	0	0	1	1	0	0	0	0	0	0	0	0	0	0	0	0	0	0	0	1	0	0
Gm5415	4	0	1	1	0	0	0	0	0	0	1	0	0	0	0	0	0	1	0	0	0	0	0	0	0
Rhpn2	4	0	0	0	0	0	1	0	0	0	1	0	0	0	0	0	0	1	0	0	0	0	0	1	0
Zfp410	4	0	1	0	0	0	0	0	0	1	0	0	1	1	0	0	0	0	0	0	0	0	0	0	0
Slc7a5	4	0	0	1	0	0	0	0	0	0	1	0	0	0	0	0	0	0	1	1	0	0	0	0	0
Egr3	4	0	1	0	0	0	0	0	0	1	1	0	1	0	0	0	0	0	0	0	0	0	0	0	0
Vezf1	4	0	1	1	0	0	0	0	0	1	0	0	1	0	0	0	0	0	0	0	0	0	0	0	0
Cyba	4	0	0	1	0	0	0	0	0	0	1	0	0	0	0	0	0	0	1	1	0	0	0	0	0
Cox7a1	4	0	0	0	0	0	1	0	0	0	1	0	0	0	0	0	0	1	0	0	0	0	0	1	0
Entpd5	4	0	1	0	0	0	0	0	0	1	0	0	1	1	0	0	0	0	0	0	0	0	0	0	0
Sel1l	4	0	1	0	0	0	0	0	0	1	0	0	1	1	0	0	0	0	0	0	0	0	0	0	0
Dclk1	4	0	0	0	0	0	0	0	0	1	1	0	0	1	1	0	0	0	0	0	0	0	0	0	0
Dok2	4	0	1	0	0	0	0	0	0	1	1	0	1	0	0	0	0	0	0	0	0	0	0	0	0
Mrpl30	4	0	1	1	0	0	0	0	0	1	1	0	0	0	0	0	0	0	0	0	0	0	0	0	0
Heatr4	4	0	1	0	0	0	0	0	0	1	0	0	1	1	0	0	0	0	0	0	0	0	0	0	0
Cbfa2t3	4	0	0	1	0	0	0	0	0	0	1	0	0	0	0	0	0	0	1	1	0	0	0	0	0
Spint2	4	0	0	0	0	0	1	0	0	0	1	0	0	0	0	0	0	1	0	0	0	0	0	1	0
Fhl2	4	0	0	1	0	0	0	0	0	1	0	0	1	0	0	0	0	0	0	0	0	0	0	1	0
Dio2	4	0	1	0	0	0	0	0	0	1	0	0	1	1	0	0	0	0	0	0	0	0	0	0	0
Il18rap	4	0	0	1	0	0	0	0	0	1	0	0	1	0	0	0	0	0	0	0	0	0	0	1	0
Gm16867	4	0	1	0	0	0	0	0	0	1	1	0	1	0	0	0	0	0	0	0	0	0	0	0	0
Tnfrsf10b	4	0	1	0	0	0	0	0	0	1	1	0	1	0	0	0	0	0	0	0	0	0	0	0	0
Sox30	4	0	0	0	0	0	0	0	1	0	1	0	1	0	0	0	0	0	0	0	1	0	0	0	0
Lipg	4	1	0	0	0	0	1	0	0	0	0	1	0	0	0	0	0	0	0	0	0	1	0	0	0
Cnga3	4	0	1	1	0	0	0	0	0	1	1	0	0	0	0	0	0	0	0	0	0	0	0	0	0
Fanca	4	0	0	1	0	0	0	0	0	0	1	0	0	0	0	0	0	0	1	1	0	0	0	0	0
Gstz1	4	0	1	0	0	0	0	0	0	1	0	0	1	1	0	0	0	0	0	0	0	0	0	0	0
Emc8	4	0	0	1	0	0	0	0	0	0	1	0	0	0	0	0	0	0	1	1	0	0	0	0	0
Synj2bp	4	0	1	0	0	0	0	0	0	1	0	0	1	1	0	0	0	0	0	0	0	0	0	0	0
Hcst	4	0	0	0	0	0	1	0	0	0	1	0	0	0	0	0	0	1	0	0	0	0	0	1	0
Def8	4	0	0	1	0	0	0	0	0	0	1	0	0	0	0	0	0	0	1	1	0	0	0	0	0
Esrrb	4	0	1	0	0	0	0	0	0	1	0	0	1	1	0	0	0	0	0	0	0	0	0	0	0
Zfp260	4	0	0	0	0	0	1	0	0	0	1	0	0	0	0	0	0	1	0	0	0	0	0	1	0
Nbea	4	0	0	0	0	0	0	0	0	1	1	0	0	1	1	0	0	0	0	0	0	0	0	0	0
Zfp146	4	0	0	0	0	0	1	0	0	0	1	0	0	0	0	0	0	1	0	0	0	0	0	1	0
Gm15217	4	0	0	0	0	0	1	0	0	1	0	0	1	0	0	0	0	0	0	1	0	0	0	0	0
Foxl1	4	0	0	1	0	0	0	0	0	0	1	0	0	0	0	0	0	0	1	1	0	0	0	0	0
Foxf1	4	0	0	1	0	0	0	0	0	0	1	0	0	0	0	0	0	0	1	1	0	0	0	0	0
Foxc2	4	0	0	1	0	0	0	0	0	0	1	0	0	0	0	0	0	0	1	1	0	0	0	0	0
Abcd4	4	0	1	0	0	0	0	0	0	1	0	0	1	1	0	0	0	0	0	0	0	0	0	0	0
Acot1	4	0	1	0	0	0	0	0	0	1	0	0	1	1	0	0	0	0	0	0	0	0	0	0	0
Pla2g7	4	0	0	0	0	1	0	0	0	1	0	0	0	0	0	1	0	0	0	0	0	0	1	0	0
Grm7	4	0	1	0	0	1	1	0	0	0	0	0	0	0	0	0	0	0	0	0	0	0	1	0	0
Txnl4a	4	1	0	0	0	0	1	0	0	0	0	1	1	0	0	0	0	0	0	0	0	0	0	0	0
Gyg	4	0	0	0	1	1	0	0	0	0	0	0	0	0	0	0	0	0	0	0	0	0	1	0	1
Nr4a2	4	0	0	0	0	0	0	0	0	1	1	0	1	0	0	0	0	0	0	0	0	0	0	1	0
Dpf1	4	0	0	0	0	0	1	0	0	0	1	0	0	0	0	0	0	1	0	0	0	0	0	1	0
Mlh3	4	0	1	0	0	0	0	0	0	1	0	0	1	1	0	0	0	0	0	0	0	0	0	0	0
Snai3	4	0	0	1	0	0	0	0	0	0	1	0	0	0	0	0	0	0	1	1	0	0	0	0	0
Lmcd1	4	0	1	0	0	1	1	0	0	0	0	0	0	0	0	0	0	0	0	0	0	0	1	0	0
Slc7a9	4	0	0	0	0	0	1	0	0	0	1	0	0	0	0	0	0	1	0	0	0	0	0	1	0
Ero1l	4	0	0	0	0	0	1	0	0	1	0	0	1	0	0	0	0	0	0	1	0	0	0	0	0
Fbxo31	4	0	0	1	0	0	0	0	0	0	1	0	0	0	0	0	0	0	1	1	0	0	0	0	0
Rgs6	4	0	1	0	0	0	0	0	0	1	0	0	1	1	0	0	0	0	0	0	0	0	0	0	0
Atp9b	4	1	0	0	0	0	1	0	0	0	0	1	1	0	0	0	0	0	0	0	0	0	0	0	0
Hs6st1	4	0	1	1	0	0	0	0	0	1	1	0	0	0	0	0	0	0	0	0	0	0	0	0	0
Galns	4	0	0	1	0	0	0	0	0	0	1	0	0	0	0	0	0	0	1	1	0	0	0	0	0
Rcan2	4	0	0	0	0	1	0	0	0	1	0	0	0	0	0	1	0	0	0	0	0	0	1	0	0
Slc7a10	4	0	0	0	0	0	1	0	0	0	1	0	0	0	0	0	0	1	0	0	0	0	0	1	0
Uba2	4	0	0	0	0	0	1	0	0	0	1	0	0	0	0	0	0	1	0	0	0	0	0	1	0
Gnpnat1	4	0	0	0	0	0	1	0	0	1	0	0	1	0	0	0	0	0	0	1	0	0	0	0	0
Batf	4	0	1	0	0	0	0	0	0	1	0	0	1	1	0	0	0	0	0	0	0	0	0	0	0
Nphs1	4	0	0	0	0	0	1	0	0	0	1	0	0	0	0	0	0	1	0	0	0	0	0	1	0
Smad9	4	0	0	0	0	0	0	0	0	1	1	0	0	1	1	0	0	0	0	0	0	0	0	0	0
Phyhip	4	0	1	0	0	0	0	0	0	1	1	0	1	0	0	0	0	0	0	0	0	0	0	0	0
Prpf40a	4	0	0	0	0	0	0	0	0	1	1	0	1	0	0	0	0	0	0	0	0	0	0	1	0
Adam21	4	0	1	0	0	0	0	0	0	1	0	0	1	1	0	0	0	0	0	0	0	0	0	0	0
Zfp276	4	0	0	1	0	0	0	0	0	0	1	0	0	0	0	0	0	0	1	1	0	0	0	0	0
Fxyd7	4	0	0	0	0	0	1	0	0	0	1	0	0	0	0	0	0	1	0	0	0	0	0	1	0
Banp	4	0	0	1	0	0	0	0	0	0	1	0	0	0	0	0	0	0	1	1	0	0	0	0	0
Fxyd1	4	0	0	0	0	0	1	0	0	0	1	0	0	0	0	0	0	1	0	0	0	0	0	1	0
Il17re	4	0	1	0	0	1	1	0	0	0	0	0	0	0	0	0	0	0	0	0	0	0	1	0	0
Jph3	4	0	0	1	0	0	0	0	0	0	1	0	0	0	0	0	0	0	1	1	0	0	0	0	0
Styx	4	0	0	0	0	0	1	0	0	1	0	0	1	0	0	0	0	0	0	1	0	0	0	0	0
Zbtb32	4	0	0	0	0	0	1	0	0	0	1	0	0	0	0	0	0	1	0	0	0	0	0	1	0
Pcnx	4	0	1	0	0	0	0	0	0	1	0	0	1	1	0	0	0	0	0	0	0	0	0	0	0
Rad18	4	0	1	0	0	1	1	0	0	0	0	0	0	0	0	0	0	0	0	0	0	0	1	0	0
Il1rl2	4	0	0	1	0	0	0	0	0	1	0	0	1	0	0	0	0	0	0	0	0	0	0	1	0
Crbn	4	0	0	0	0	1	0	0	0	0	0	0	0	0	0	1	0	0	0	0	0	0	1	1	0
Ylpm1	4	0	1	0	0	0	0	0	0	1	0	0	1	1	0	0	0	0	0	0	0	0	0	0	0
Postn	4	0	0	0	0	0	0	0	0	1	1	0	0	1	1	0	0	0	0	0	0	0	0	0	0
Bco1	4	0	0	1	0	0	0	0	0	0	1	0	0	0	0	0	0	0	1	1	0	0	0	0	0
Cyp39a1	4	0	0	0	0	1	0	0	0	1	0	0	0	0	0	1	0	0	0	0	0	0	1	0	0
Tmem131	4	0	1	1	0	0	0	0	0	1	1	0	0	0	0	0	0	0	0	0	0	0	0	0	0
Gmfb	4	0	0	0	0	0	1	0	0	1	0	0	1	0	0	0	0	0	0	1	0	0	0	0	0
Tbc1d8	4	0	1	1	0	0	0	0	0	1	1	0	0	0	0	0	0	0	0	0	0	0	0	0	0
Mbtps1	4	0	0	1	0	0	0	0	0	0	1	0	0	0	0	0	0	0	1	1	0	0	0	0	0
Lsr	4	0	0	0	0	0	1	0	0	0	1	0	0	0	0	0	0	1	0	0	0	0	0	1	0
Prpmp5	4	0	1	0	0	0	1	0	0	0	1	1	0	0	0	0	0	0	0	0	0	0	0	0	0
Mrps23	4	0	1	1	0	0	0	0	0	1	0	0	1	0	0	0	0	0	0	0	0	0	0	0	0
Krtdap	4	0	0	0	0	0	1	0	0	0	1	0	0	0	0	0	0	1	0	0	0	0	0	1	0
Mlycd	4	0	0	1	0	0	0	0	0	0	1	0	0	0	0	0	0	0	1	1	0	0	0	0	0
Rev1	4	0	1	1	0	0	0	0	0	1	1	0	0	0	0	0	0	0	0	0	0	0	0	0	0
Prodh2	4	0	0	0	0	0	1	0	0	0	1	0	0	0	0	0	0	1	0	0	0	0	0	1	0
Ctdp1	4	1	0	0	0	0	1	0	0	0	0	1	1	0	0	0	0	0	0	0	0	0	0	0	0
Rgr	4	0	0	0	0	0	0	0	0	1	0	0	1	0	0	0	0	1	0	1	0	0	0	0	0
Arl6ip6	4	0	0	0	0	0	0	0	0	1	1	0	1	0	0	0	0	0	0	0	0	0	0	1	0
Supt20	4	0	0	0	0	0	0	0	0	1	1	0	0	1	1	0	0	0	0	0	0	0	0	0	0
Xpo7	4	0	1	0	0	0	0	0	0	1	1	0	1	0	0	0	0	0	0	0	0	0	0	0	0
Bin3	4	0	1	0	0	0	0	0	0	1	1	0	1	0	0	0	0	0	0	0	0	0	0	0	0
Ghrl	4	0	1	0	0	1	1	0	0	0	0	0	0	0	0	0	0	0	0	0	0	0	1	0	0
Piwil2	4	0	1	0	0	0	0	0	0	1	1	0	1	0	0	0	0	0	0	0	0	0	0	0	0
Emc3	4	0	1	0	0	1	1	0	0	0	0	0	0	0	0	0	0	0	0	0	0	0	1	0	0
Ghitm	4	0	0	0	0	0	0	0	0	1	0	0	1	0	0	0	0	1	0	1	0	0	0	0	0
Acyp1	4	0	1	0	0	0	0	0	0	1	0	0	1	1	0	0	0	0	0	0	0	0	0	0	0
Alg5	4	0	0	0	0	0	0	0	0	1	1	0	0	1	1	0	0	0	0	0	0	0	0	0	0
Hsbp1l1	4	1	0	0	0	0	1	0	0	0	0	1	1	0	0	0	0	0	0	0	0	0	0	0	0
Cox16	4	0	1	0	0	0	0	0	0	1	0	0	1	1	0	0	0	0	0	0	0	0	0	0	0
Pdcd5	4	0	0	0	0	0	1	0	0	0	1	0	0	0	0	0	0	1	0	0	0	0	0	1	0
Dnajc5b	4	0	0	0	1	1	0	0	0	0	0	0	0	0	0	0	0	0	0	0	0	0	1	0	1
Psenen	4	0	0	0	0	0	1	0	0	0	1	0	0	0	0	0	0	1	0	0	0	0	0	1	0
Snw1	4	0	1	0	0	0	0	0	0	1	0	0	1	1	0	0	0	0	0	0	0	0	0	0	0
Rnf113a2	4	0	1	0	0	0	0	0	0	1	0	0	1	1	0	0	0	0	0	0	0	0	0	0	0
Tbcb	4	0	0	0	0	0	1	0	0	0	1	0	0	0	0	0	0	1	0	0	0	0	0	1	0
Magohb	4	0	1	0	0	0	1	0	0	0	1	1	0	0	0	0	0	0	0	0	0	0	0	0	0
Cmc2	4	0	0	1	0	0	0	0	0	0	1	0	0	0	0	0	0	0	1	1	0	0	0	0	0
Thg1l	4	0	0	0	0	0	0	0	1	0	1	0	1	0	0	0	0	0	0	0	1	0	0	0	0
Chmp7	4	0	1	0	0	0	0	0	0	1	1	0	1	0	0	0	0	0	0	0	0	0	0	0	0
Kcng4	4	0	0	1	0	0	0	0	0	0	1	0	0	0	0	0	0	0	1	1	0	0	0	0	0
Gm20498	4	0	1	0	0	0	0	0	0	1	0	0	1	1	0	0	0	0	0	0	0	0	0	0	0
4933415F23Rik	4	0	1	0	0	0	0	0	0	1	1	0	0	0	0	0	0	0	0	0	0	0	0	1	0
Tcf25	4	0	0	1	0	0	0	0	0	0	1	0	0	0	0	0	0	0	1	1	0	0	0	0	0
Vps9d1	4	0	0	1	0	0	0	0	0	0	1	0	0	0	0	0	0	0	1	1	0	0	0	0	0
Pqlc1	4	1	0	0	0	0	1	0	0	0	0	1	1	0	0	0	0	0	0	0	0	0	0	0	0
Ctu2	4	0	0	1	0	0	0	0	0	0	1	0	0	0	0	0	0	0	1	1	0	0	0	0	0
Rbm25	4	0	1	0	0	0	0	0	0	1	0	0	1	1	0	0	0	0	0	0	0	0	0	0	0
Polr3d	4	0	1	0	0	0	0	0	0	1	1	0	1	0	0	0	0	0	0	0	0	0	0	0	0
Lsm14a	4	0	0	0	0	0	1	0	0	0	1	0	0	0	0	0	0	1	0	0	0	0	0	1	0
Psmc6	4	0	0	0	0	0	1	0	0	1	0	0	1	0	0	0	0	0	0	1	0	0	0	0	0
Cdt1	4	0	0	1	0	0	0	0	0	0	1	0	0	0	0	0	0	0	1	1	0	0	0	0	0
Unc50	4	0	1	1	0	0	0	0	0	1	1	0	0	0	0	0	0	0	0	0	0	0	0	0	0
Map1lc3b	4	0	0	1	0	0	0	0	0	0	1	0	0	0	0	0	0	0	1	1	0	0	0	0	0
Entpd4	4	0	1	0	0	0	0	0	0	1	1	0	1	0	0	0	0	0	0	0	0	0	0	0	0
Gpatch1	4	0	0	0	0	0	1	0	0	0	1	0	0	0	0	0	0	1	0	0	0	0	0	1	0
Ankrd39	4	0	1	1	0	0	0	0	0	1	1	0	0	0	0	0	0	0	0	0	0	0	0	0	0
Slc25a37	4	0	1	0	0	0	0	0	0	1	1	0	1	0	0	0	0	0	0	0	0	0	0	0	0
Tmem147	4	0	0	0	0	0	1	0	0	0	1	0	0	0	0	0	0	1	0	0	0	0	0	1	0
Jagn1	4	0	1	0	0	1	1	0	0	0	0	0	0	0	0	0	0	0	0	0	0	0	1	0	0
Aldh6a1	4	0	1	0	0	0	0	0	0	1	0	0	1	1	0	0	0	0	0	0	0	0	0	0	0
Wfdc1	4	0	0	1	0	0	0	0	0	0	1	0	0	0	0	0	0	0	1	1	0	0	0	0	0
Rprm	4	0	0	0	0	0	0	0	0	1	1	0	1	0	0	0	0	0	0	0	0	0	0	1	0
Ufm1	4	0	0	0	0	0	0	0	0	1	1	0	0	1	1	0	0	0	0	0	0	0	0	0	0
Npc2	4	0	1	0	0	0	0	0	0	1	0	0	1	1	0	0	0	0	0	0	0	0	0	0	0
Sdhaf4	4	0	1	0	0	0	0	0	0	1	1	0	0	0	0	0	0	0	0	0	0	0	0	1	0
Rbm42	4	0	0	0	0	0	1	0	0	0	1	0	0	0	0	0	0	1	0	0	0	0	0	1	0
Pdcd2l	4	0	0	0	0	0	1	0	0	0	1	0	0	0	0	0	0	1	0	0	0	0	0	1	0
Arpc4	4	0	1	0	0	1	1	0	0	0	0	0	0	0	0	0	0	0	0	0	0	0	1	0	0
Dynll2	4	0	1	1	0	0	0	0	0	1	0	0	1	0	0	0	0	0	0	0	0	0	0	0	0
Gcsh	4	0	0	1	0	0	0	0	0	0	1	0	0	0	0	0	0	0	1	1	0	0	0	0	0
Brk1	4	0	1	0	0	1	1	0	0	0	0	0	0	0	0	0	0	0	0	0	0	0	1	0	0
Fam135a	4	0	1	0	0	0	0	0	0	1	1	0	0	0	0	0	0	0	0	0	0	0	0	1	0
Hsbp1	4	0	0	1	0	0	0	0	0	0	1	0	0	0	0	0	0	0	1	1	0	0	0	0	0
Dnaaf1	4	0	0	1	0	0	0	0	0	0	1	0	0	0	0	0	0	0	1	1	0	0	0	0	0
Erg28	4	0	1	0	0	0	0	0	0	1	0	0	1	1	0	0	0	0	0	0	0	0	0	0	0
Sdhaf1	4	0	0	0	0	0	1	0	0	0	1	0	0	0	0	0	0	1	0	0	0	0	0	1	0
Lmbrd1	4	0	1	0	0	0	0	0	0	1	1	0	0	0	0	0	0	0	0	0	0	0	0	1	0
Tada3	4	0	1	0	0	1	1	0	0	0	0	0	0	0	0	0	0	0	0	0	0	0	1	0	0
Arel1	4	0	1	0	0	0	0	0	0	1	0	0	1	1	0	0	0	0	0	0	0	0	0	0	0
Mphosph6	4	0	0	1	0	0	0	0	0	0	1	0	0	0	0	0	0	0	1	1	0	0	0	0	0
Tmed10	4	0	1	0	0	0	0	0	0	1	0	0	1	1	0	0	0	0	0	0	0	0	0	0	0
Rnf166	4	0	0	1	0	0	0	0	0	0	1	0	0	0	0	0	0	0	1	1	0	0	0	0	0
Rbfa	4	1	0	0	0	0	1	0	0	0	0	1	1	0	0	0	0	0	0	0	0	0	0	0	0
Angel1	4	0	1	0	0	0	0	0	0	1	0	0	1	1	0	0	0	0	0	0	0	0	0	0	0
Mtmr14	4	0	1	0	0	1	1	0	0	0	0	0	0	0	0	0	0	0	0	0	0	0	1	0	0
Pdcl3	4	0	1	1	0	0	0	0	0	1	1	0	0	0	0	0	0	0	0	0	0	0	0	0	0
1190005I06Rik	4	0	0	1	0	0	0	0	0	0	1	0	0	0	0	0	0	0	1	1	0	0	0	0	0
Chst8	4	0	0	0	0	0	1	0	0	0	1	0	0	0	0	0	0	1	0	0	0	0	0	1	0
Mitd1	4	0	1	1	0	0	0	0	0	1	1	0	0	0	0	0	0	0	0	0	0	0	0	0	0
Trappc2l	4	0	0	1	0	0	0	0	0	0	1	0	0	0	0	0	0	0	1	1	0	0	0	0	0
Atp2c2	4	0	0	1	0	0	0	0	0	0	1	0	0	0	0	0	0	0	1	1	0	0	0	0	0
Cgrrf1	4	0	0	0	0	0	1	0	0	1	0	0	1	0	0	0	0	0	0	1	0	0	0	0	0
Ptgr2	4	0	1	0	0	0	0	0	0	1	0	0	1	1	0	0	0	0	0	0	0	0	0	0	0
Zfp507	4	0	0	0	0	0	1	0	0	0	1	0	0	0	0	0	0	1	0	0	0	0	0	1	0
Slirp	4	0	1	0	0	0	0	0	0	1	0	0	1	1	0	0	0	0	0	0	0	0	0	0	0
2200002J24Rik	4	0	0	0	0	0	1	0	0	0	1	0	0	0	0	0	0	1	0	0	0	0	0	1	0
Ttc9	4	0	1	0	0	0	0	0	0	1	0	0	1	1	0	0	0	0	0	0	0	0	0	0	0
Dydc1	4	0	0	0	0	0	1	0	0	1	0	0	1	0	0	0	0	0	0	1	0	0	0	0	0
Mrps9	4	0	0	1	0	0	0	0	0	1	0	0	1	0	0	0	0	0	0	0	0	0	0	1	0
1700030J22Rik	4	0	0	1	0	0	0	0	0	0	1	0	0	0	0	0	0	0	1	1	0	0	0	0	0
Lyg1	4	0	1	1	0	0	0	0	0	1	1	0	0	0	0	0	0	0	0	0	0	0	0	0	0
Rhou	4	0	0	1	0	0	0	0	0	0	1	0	0	0	0	0	0	0	1	1	0	0	0	0	0
Exosc8	4	0	0	0	0	0	0	0	0	1	1	0	0	1	1	0	0	0	0	0	0	0	0	0	0
Ccdc115	4	0	1	1	0	0	0	0	0	1	1	0	0	0	0	0	0	0	0	0	0	0	0	0	0
Med6	4	0	1	0	0	0	0	0	0	1	0	0	1	1	0	0	0	0	0	0	0	0	0	0	0
Polr2i	4	0	0	0	0	0	1	0	0	0	1	0	0	0	0	0	0	1	0	0	0	0	0	1	0
2610528A11Rik	4	0	0	0	0	0	0	0	0	1	0	0	1	0	0	0	0	1	0	1	0	0	0	0	0
Trnt1	4	0	0	0	0	1	0	0	0	0	0	0	0	0	0	1	0	0	0	0	0	0	1	1	0
Dpf3	4	0	1	0	0	0	0	0	0	1	0	0	1	1	0	0	0	0	0	0	0	0	0	0	0
Ogfrl1	4	0	1	0	0	0	0	0	0	1	1	0	0	0	0	0	0	0	0	0	0	0	0	1	0
Actr1b	4	0	1	1	0	0	0	0	0	1	1	0	0	0	0	0	0	0	0	0	0	0	0	0	0
Gpatch2l	4	0	1	0	0	0	0	0	0	1	0	0	1	1	0	0	0	0	0	0	0	0	0	0	0
2210416O15Rik	4	0	1	1	0	0	0	0	0	1	0	0	1	0	0	0	0	0	0	0	0	0	0	0	0
Adamdec1	4	0	1	0	0	0	0	0	0	1	1	0	1	0	0	0	0	0	0	0	0	0	0	0	0
Txndc16	4	0	0	0	0	0	1	0	0	1	0	0	1	0	0	0	0	0	0	1	0	0	0	0	0
Fam213a	4	0	0	0	0	0	1	0	0	1	0	0	1	0	0	0	0	0	0	1	0	0	0	0	0
Gpr137c	4	0	0	0	0	0	1	0	0	1	0	0	1	0	0	0	0	0	0	1	0	0	0	0	0
Kansl3	4	0	1	1	0	0	0	0	0	1	1	0	0	0	0	0	0	0	0	0	0	0	0	0	0
Vwa3b	4	0	1	1	0	0	0	0	0	1	1	0	0	0	0	0	0	0	0	0	0	0	0	0	0
Tshr	4	0	1	0	0	0	0	0	0	1	0	0	1	1	0	0	0	0	0	0	0	0	0	0	0
Ston2	4	0	1	0	0	0	0	0	0	1	0	0	1	1	0	0	0	0	0	0	0	0	0	0	0
4933424G06Rik	4	0	1	1	0	0	0	0	0	1	1	0	0	0	0	0	0	0	0	0	0	0	0	0	0
Dydc2	4	0	0	0	0	0	1	0	0	1	0	0	1	0	0	0	0	0	0	1	0	0	0	0	0
Dym	4	1	0	0	0	0	1	0	0	0	0	1	0	0	0	0	0	0	0	0	0	1	0	0	0
Noxred1	4	0	1	0	0	0	0	0	0	1	0	0	1	1	0	0	0	0	0	0	0	0	0	0	0
5430401F13Rik	4	0	1	0	0	0	1	0	0	0	1	1	0	0	0	0	0	0	0	0	0	0	0	0	0
Fmnl2	4	0	0	0	0	0	0	0	0	1	1	0	1	0	0	0	0	0	0	0	0	0	0	1	0
Osgin1	4	0	0	1	0	0	0	0	0	0	1	0	0	0	0	0	0	0	1	1	0	0	0	0	0
R3hcc1	4	0	1	0	0	0	0	0	0	1	1	0	1	0	0	0	0	0	0	0	0	0	0	0	0
Haus5	4	0	0	0	0	0	1	0	0	0	1	0	0	0	0	0	0	1	0	0	0	0	0	1	0
Cipc	4	0	1	0	0	0	0	0	0	1	0	0	1	1	0	0	0	0	0	0	0	0	0	0	0
Riox1	4	0	1	0	0	0	0	0	0	1	0	0	1	1	0	0	0	0	0	0	0	0	0	0	0
Tdrd12	4	0	0	0	0	0	1	0	0	0	1	0	0	0	0	0	0	1	0	0	0	0	0	1	0
Cotl1	4	0	0	1	0	0	0	0	0	0	1	0	0	0	0	0	0	0	1	1	0	0	0	0	0
2010300C02Rik	4	0	1	1	0	0	0	0	0	1	1	0	0	0	0	0	0	0	0	0	0	0	0	0	0
Adck1	4	0	1	0	0	0	0	0	0	1	0	0	1	1	0	0	0	0	0	0	0	0	0	0	0
Cep89	4	0	0	0	0	0	1	0	0	0	1	0	0	0	0	0	0	1	0	0	0	0	0	1	0
Cenpn	4	0	0	1	0	0	0	0	0	0	1	0	0	0	0	0	0	0	1	1	0	0	0	0	0
Dbndd1	4	0	0	1	0	0	0	0	0	0	1	0	0	0	0	0	0	0	1	1	0	0	0	0	0
Lsm11	4	0	0	0	0	0	0	0	1	0	1	0	1	0	0	0	0	0	0	0	1	0	0	0	0
Zc2hc1c	4	0	1	0	0	0	0	0	0	1	0	0	1	1	0	0	0	0	0	0	0	0	0	0	0
Cdkn3	4	0	0	0	0	0	1	0	0	1	0	0	1	0	0	0	0	0	0	1	0	0	0	0	0
Reep4	4	0	1	0	0	0	0	0	0	1	1	0	1	0	0	0	0	0	0	0	0	0	0	0	0
Hsdl1	4	0	0	1	0	0	0	0	0	0	1	0	0	0	0	0	0	0	1	1	0	0	0	0	0
Zfp566	4	0	0	0	0	0	1	0	0	0	1	0	0	0	0	0	0	1	0	0	0	0	0	1	0
Bbof1	4	0	1	0	0	0	0	0	0	1	0	0	1	1	0	0	0	0	0	0	0	0	0	0	0
Setd5	4	0	1	0	0	1	1	0	0	0	0	0	0	0	0	0	0	0	0	0	0	0	1	0	0
Chmp1a	4	0	0	1	0	0	0	0	0	0	1	0	0	0	0	0	0	0	1	1	0	0	0	0	0
Lonrf2	4	0	1	1	0	0	0	0	0	1	1	0	0	0	0	0	0	0	0	0	0	0	0	0	0
1700049E17Rik1	4	0	0	0	0	0	1	0	0	1	0	0	1	0	0	0	0	0	0	1	0	0	0	0	0
Prox2	4	0	1	0	0	0	0	0	0	1	0	0	1	1	0	0	0	0	0	0	0	0	0	0	0
1700064H15Rik	4	0	0	0	1	1	0	0	0	0	0	0	0	0	0	0	0	0	0	0	0	0	1	0	1
Dmkn	4	0	0	0	0	0	1	0	0	0	1	0	0	0	0	0	0	1	0	0	0	0	0	1	0
Zfp383	4	0	0	0	0	0	1	0	0	0	1	0	0	0	0	0	0	1	0	0	0	0	0	1	0
Fcf1	4	0	1	0	0	0	0	0	0	1	0	0	1	1	0	0	0	0	0	0	0	0	0	0	0
Gins2	4	0	0	1	0	0	0	0	0	0	1	0	0	0	0	0	0	0	1	1	0	0	0	0	0
Dcaf4	4	0	1	0	0	0	0	0	0	1	0	0	1	1	0	0	0	0	0	0	0	0	0	0	0
Slc25a27	4	0	0	0	0	1	0	0	0	1	0	0	0	0	0	1	0	0	0	0	0	0	1	0	0
Sdr42e1	4	0	0	1	0	0	0	0	0	0	1	0	0	0	0	0	0	0	1	1	0	0	0	0	0
Acot6	4	0	1	0	0	0	0	0	0	1	0	0	1	1	0	0	0	0	0	0	0	0	0	0	0
Sipa1l3	4	0	0	0	0	0	1	0	0	0	1	0	0	0	0	0	0	1	0	0	0	0	0	1	0
Dnal1	4	0	1	0	0	0	0	0	0	1	0	0	1	1	0	0	0	0	0	0	0	0	0	0	0
Ccdc182	4	0	1	1	0	0	0	0	0	1	0	0	1	0	0	0	0	0	0	0	0	0	0	0	0
Isca2	4	0	1	0	0	0	0	0	0	1	0	0	1	1	0	0	0	0	0	0	0	0	0	0	0
Tldc1	4	0	0	1	0	0	0	0	0	0	1	0	0	0	0	0	0	0	1	1	0	0	0	0	0
Sohlh2	4	0	0	0	0	0	0	0	0	1	1	0	0	1	1	0	0	0	0	0	0	0	0	0	0
Cmip	4	0	0	1	0	0	0	0	0	0	1	0	0	0	0	0	0	0	1	1	0	0	0	0	0
E130208F15Rik	4	0	0	0	0	0	1	0	0	0	1	0	0	0	0	0	0	1	0	0	0	0	0	1	0
Pmis2	4	0	0	0	0	0	1	0	0	0	1	0	0	0	0	0	0	1	0	0	0	0	0	1	0
Gm26920	4	0	0	0	0	0	1	0	0	0	1	0	0	0	0	0	0	1	0	0	0	0	0	1	0
Gm27021	4	0	0	1	0	0	0	0	0	0	1	0	0	0	0	0	0	0	1	1	0	0	0	0	0
Cep128	4	0	1	0	0	0	0	0	0	1	0	0	1	1	0	0	0	0	0	0	0	0	0	0	0
Gm27179	4	0	1	0	0	0	0	0	0	1	1	0	1	0	0	0	0	0	0	0	0	0	0	0	0
Gm11099	4	0	0	0	0	0	0	0	0	1	1	0	1	0	0	0	0	0	0	0	0	0	0	1	0
Dynlrb2	4	0	0	1	0	0	0	0	0	0	1	0	0	0	0	0	0	0	1	1	0	0	0	0	0
1700024B05Rik	4	0	0	0	0	0	1	0	0	1	0	0	1	0	0	0	0	0	0	1	0	0	0	0	0
Thap8	4	0	0	0	0	0	1	0	0	0	1	0	0	0	0	0	0	1	0	0	0	0	0	1	0
Lin37	4	0	0	0	0	0	1	0	0	0	1	0	0	0	0	0	0	1	0	0	0	0	0	1	0
Adad2	4	0	0	1	0	0	0	0	0	0	1	0	0	0	0	0	0	0	1	1	0	0	0	0	0
Cdyl2	4	0	0	1	0	0	0	0	0	0	1	0	0	0	0	0	0	0	1	1	0	0	0	0	0
Zc3h18	4	0	0	1	0	0	0	0	0	0	1	0	0	0	0	0	0	0	1	1	0	0	0	0	0
Lpo	4	0	1	1	0	0	0	0	0	1	0	0	1	0	0	0	0	0	0	0	0	0	0	0	0
Coa5	4	0	1	1	0	0	0	0	0	1	1	0	0	0	0	0	0	0	0	0	0	0	0	0	0
Zfp790	4	0	0	0	0	0	1	0	0	0	1	0	0	0	0	0	0	1	0	0	0	0	0	1	0
Tmed8	4	0	1	0	0	0	0	0	0	1	0	0	1	1	0	0	0	0	0	0	0	0	0	0	0
1700018B08Rik	4	0	0	1	0	0	0	0	0	0	1	0	0	0	0	0	0	0	1	1	0	0	0	0	0
Ift43	4	0	1	0	0	0	0	0	0	1	0	0	1	1	0	0	0	0	0	0	0	0	0	0	0
Fam187b	4	0	0	0	0	0	1	0	0	0	1	0	0	0	0	0	0	1	0	0	0	0	0	1	0
Wdr62	4	0	0	0	0	0	1	0	0	0	1	0	0	0	0	0	0	1	0	0	0	0	0	1	0
Tmem182	4	0	0	1	0	0	0	0	0	1	0	0	1	0	0	0	0	0	0	0	0	0	0	1	0
Msi2	4	0	1	1	0	0	0	0	0	1	0	0	1	0	0	0	0	0	0	0	0	0	0	0	0
Upp2	4	0	0	0	0	0	0	0	0	1	1	0	1	0	0	0	0	0	0	0	0	0	0	1	0
Scgb1b18	4	0	0	0	0	0	1	0	0	0	1	0	0	0	0	0	0	1	0	0	0	0	0	1	0
Clip3	4	0	0	0	0	0	1	0	0	0	1	0	0	0	0	0	0	1	0	0	0	0	0	1	0
Cpb1	4	0	0	0	1	1	0	0	0	0	0	0	0	0	0	0	0	0	0	0	0	0	1	0	1
Catsperg2	4	0	0	0	0	0	1	0	0	0	1	0	0	0	0	0	0	1	0	0	0	0	0	1	0
Cyfip2	4	0	0	0	0	0	0	0	1	0	1	0	1	0	0	0	0	0	0	0	1	0	0	0	0
4931406P16Rik	4	0	0	0	0	0	1	0	0	0	1	0	0	0	0	0	0	1	0	0	0	0	0	1	0
Ankrd11	4	0	0	1	0	0	0	0	0	0	1	0	0	0	0	0	0	0	1	1	0	0	0	0	0
Scgb1b20	4	0	0	0	0	0	1	0	0	0	1	0	0	0	0	0	0	1	0	0	0	0	0	1	0
Coq6	4	0	1	0	0	0	0	0	0	1	0	0	1	1	0	0	0	0	0	0	0	0	0	0	0
Kcnq5	4	0	1	0	0	0	0	0	0	1	1	0	0	0	0	0	0	0	0	0	0	0	0	1	0
Ermn	4	0	0	0	0	0	0	0	0	1	1	0	1	0	0	0	0	0	0	0	0	0	0	1	0
Ankrd66	4	0	0	0	0	1	0	0	0	1	0	0	0	0	0	1	0	0	0	0	0	0	1	0	0
Sh2d4b	4	0	0	0	0	0	1	0	0	1	0	0	1	0	0	0	0	0	0	1	0	0	0	0	0
Gm9195	4	0	1	0	0	0	0	0	0	1	1	0	1	0	0	0	0	0	0	0	0	0	0	0	0
Ankrd23	4	0	1	1	0	0	0	0	0	1	1	0	0	0	0	0	0	0	0	0	0	0	0	0	0
Spata2l	4	0	0	1	0	0	0	0	0	0	1	0	0	0	0	0	0	0	1	1	0	0	0	0	0
Brpf1	4	0	1	0	0	1	1	0	0	0	0	0	0	0	0	0	0	0	0	0	0	0	1	0	0
Crispld2	4	0	0	1	0	0	0	0	0	0	1	0	0	0	0	0	0	0	1	1	0	0	0	0	0
Dlst	4	0	1	0	0	0	0	0	0	1	0	0	1	1	0	0	0	0	0	0	0	0	0	0	0
Inpp4a	4	0	1	1	0	0	0	0	0	1	1	0	0	0	0	0	0	0	0	0	0	0	0	0	0
Jdp2	4	0	1	0	0	0	0	0	0	1	0	0	1	1	0	0	0	0	0	0	0	0	0	0	0
Scgb1b11	4	0	0	0	0	0	1	0	0	0	1	0	0	0	0	0	0	1	0	0	0	0	0	1	0
Scgb1b10	4	0	0	0	0	0	1	0	0	0	1	0	0	0	0	0	0	1	0	0	0	0	0	1	0
Tex14	4	0	1	1	0	0	0	0	0	1	0	0	1	0	0	0	0	0	0	0	0	0	0	0	0
Gtf2a1	4	0	1	0	0	0	0	0	0	1	0	0	1	1	0	0	0	0	0	0	0	0	0	0	0
Hamp	4	0	0	0	0	0	1	0	0	0	1	0	0	0	0	0	0	1	0	0	0	0	0	1	0
Pard6g	4	1	0	0	0	0	1	0	0	0	0	1	1	0	0	0	0	0	0	0	0	0	0	0	0
Gpr45	4	0	0	1	0	0	0	0	0	1	0	0	1	0	0	0	0	0	0	0	0	0	0	1	0
Ybx3	4	0	1	0	0	0	1	0	0	0	1	1	0	0	0	0	0	0	0	0	0	0	0	0	0
Zfp451	4	0	1	1	0	0	0	0	0	1	1	0	0	0	0	0	0	0	0	0	0	0	0	0	0
Loxl2	4	0	1	0	0	0	0	0	0	1	1	0	1	0	0	0	0	0	0	0	0	0	0	0	0
Txndc9	4	0	1	1	0	0	0	0	0	1	1	0	0	0	0	0	0	0	0	0	0	0	0	0	0
Smap1	4	0	1	0	0	0	0	0	0	1	1	0	0	0	0	0	0	0	0	0	0	0	0	1	0
Chst10	4	0	1	1	0	0	0	0	0	1	1	0	0	0	0	0	0	0	0	0	0	0	0	0	0
AI597479	4	0	0	1	0	0	0	0	0	1	0	0	1	0	0	0	0	0	0	0	0	0	0	1	0
Galnt13	4	0	0	0	0	0	0	0	0	1	1	0	1	0	0	0	0	0	0	0	0	0	0	1	0
Spg20	4	0	0	0	0	0	0	0	0	1	1	0	0	1	1	0	0	0	0	0	0	0	0	0	0
Gm2075	4	0	1	0	0	0	0	0	0	1	0	0	1	1	0	0	0	0	0	0	0	0	0	0	0
Styk1	4	0	1	0	0	0	1	0	0	0	1	1	0	0	0	0	0	0	0	0	0	0	0	0	0
Ttll3	4	0	1	0	0	1	1	0	0	0	0	0	0	0	0	0	0	0	0	0	0	0	1	0	0
Rpusd3	4	0	1	0	0	1	1	0	0	0	0	0	0	0	0	0	0	0	0	0	0	0	1	0	0
Wtip	4	0	0	0	0	0	1	0	0	0	1	0	0	0	0	0	0	1	0	0	0	0	0	1	0
Syne4	4	0	0	0	0	0	1	0	0	0	1	0	0	0	0	0	0	1	0	0	0	0	0	1	0
Alkbh6	4	0	0	0	0	0	1	0	0	0	1	0	0	0	0	0	0	1	0	0	0	0	0	1	0
Faap24	4	0	0	0	0	0	1	0	0	0	1	0	0	0	0	0	0	1	0	0	0	0	0	1	0
Zfp568	4	0	0	0	0	0	1	0	0	0	1	0	0	0	0	0	0	1	0	0	0	0	0	1	0
Zdhhc7	4	0	0	1	0	0	0	0	0	0	1	0	0	0	0	0	0	0	1	1	0	0	0	0	0
Cpne7	4	0	0	1	0	0	0	0	0	0	1	0	0	0	0	0	0	0	1	1	0	0	0	0	0
Clint1	4	0	0	0	0	0	0	0	1	0	1	0	1	0	0	0	0	0	0	0	1	0	0	0	0
Vipas39	4	0	1	0	0	0	0	0	0	1	0	0	1	1	0	0	0	0	0	0	0	0	0	0	0
Eif2b2	4	0	1	0	0	0	0	0	0	1	0	0	1	1	0	0	0	0	0	0	0	0	0	0	0
9930012K11Rik	4	0	1	0	0	0	0	0	0	1	1	0	1	0	0	0	0	0	0	0	0	0	0	0	0
Ppp1r14a	4	0	0	0	0	0	1	0	0	0	1	0	0	0	0	0	0	1	0	0	0	0	0	1	0
Gm49396	4	0	0	0	0	0	1	0	0	0	1	0	0	0	0	0	0	1	0	0	0	0	0	1	0
Rpl31	4	0	1	1	0	0	0	0	0	1	1	0	0	0	0	0	0	0	0	0	0	0	0	0	0
Rad51c	4	0	1	1	0	0	0	0	0	1	0	0	1	0	0	0	0	0	0	0	0	0	0	0	0
Ddhd1	4	0	0	0	0	0	1	0	0	1	0	0	1	0	0	0	0	0	0	1	0	0	0	0	0
Afg3l1	4	0	0	1	0	0	0	0	0	0	1	0	0	0	0	0	0	0	1	1	0	0	0	0	0
Cnnm3	4	0	1	1	0	0	0	0	0	1	1	0	0	0	0	0	0	0	0	0	0	0	0	0	0
Cnnm4	4	0	1	1	0	0	0	0	0	1	1	0	0	0	0	0	0	0	0	0	0	0	0	0	0
Gan	4	0	0	1	0	0	0	0	0	0	1	0	0	0	0	0	0	0	1	1	0	0	0	0	0
Ngb	4	0	1	0	0	0	0	0	0	1	0	0	1	1	0	0	0	0	0	0	0	0	0	0	0
Necab2	4	0	0	1	0	0	0	0	0	0	1	0	0	0	0	0	0	0	1	1	0	0	0	0	0
Srgap3	4	0	1	0	0	1	1	0	0	0	0	0	0	0	0	0	0	0	0	0	0	0	1	0	0
Rims1	4	0	1	0	0	0	0	0	0	1	1	0	0	0	0	0	0	0	0	0	0	0	0	1	0
Hps3	4	0	0	0	1	1	0	0	0	0	0	0	0	0	0	0	0	0	0	0	0	0	1	0	1
Cdhr1	4	0	0	0	0	0	0	0	0	1	0	0	1	0	0	0	0	1	0	1	0	0	0	0	0
Il17rc	4	0	1	0	0	1	1	0	0	0	0	0	0	0	0	0	0	0	0	0	0	0	1	0	0
Zcchc14	4	0	0	1	0	0	0	0	0	0	1	0	0	0	0	0	0	0	1	1	0	0	0	0	0
Acot2	4	0	1	0	0	0	0	0	0	1	0	0	1	1	0	0	0	0	0	0	0	0	0	0	0
Acot3	4	0	1	0	0	0	0	0	0	1	0	0	1	1	0	0	0	0	0	0	0	0	0	0	0
Acot4	4	0	1	0	0	0	0	0	0	1	0	0	1	1	0	0	0	0	0	0	0	0	0	0	0
Khdrbs2	4	0	1	1	0	0	0	0	0	1	1	0	0	0	0	0	0	0	0	0	0	0	0	0	0
Creld1	4	0	1	0	0	1	1	0	0	0	0	0	0	0	0	0	0	0	0	0	0	0	1	0	0
Trhr2	4	0	0	1	0	0	0	0	0	0	1	0	0	0	0	0	0	0	1	1	0	0	0	0	0
Mvd	4	0	0	1	0	0	0	0	0	0	1	0	0	0	0	0	0	0	1	1	0	0	0	0	0
Galnt5	4	0	0	0	0	0	0	0	0	1	1	0	1	0	0	0	0	0	0	0	0	0	0	1	0
Lgi4	4	0	0	0	0	0	1	0	0	0	1	0	0	0	0	0	0	1	0	0	0	0	0	1	0
Rhobtb2	4	0	1	0	0	0	0	0	0	1	1	0	1	0	0	0	0	0	0	0	0	0	0	0	0
Mtmr4	4	0	1	1	0	0	0	0	0	1	0	0	1	0	0	0	0	0	0	0	0	0	0	0	0
Rfxap	4	0	0	0	0	0	0	0	0	1	1	0	0	1	1	0	0	0	0	0	0	0	0	0	0
Acsf3	4	0	0	1	0	0	0	0	0	0	1	0	0	0	0	0	0	0	1	1	0	0	0	0	0
Lgi3	4	0	1	0	0	0	0	0	0	1	1	0	1	0	0	0	0	0	0	0	0	0	0	0	0
Cytip	4	0	0	0	0	0	0	0	0	1	1	0	1	0	0	0	0	0	0	0	0	0	0	1	0
Rgs9bp	4	0	0	0	0	0	1	0	0	0	1	0	0	0	0	0	0	1	0	0	0	0	0	1	0
Klhdc4	4	0	0	1	0	0	0	0	0	0	1	0	0	0	0	0	0	0	1	1	0	0	0	0	0
Plekhb2	4	0	1	1	0	0	0	0	0	1	1	0	0	0	0	0	0	0	0	0	0	0	0	0	0
Papln	4	0	1	0	0	0	0	0	0	1	0	0	1	1	0	0	0	0	0	0	0	0	0	0	0
Ovol3	4	0	0	0	0	0	1	0	0	0	1	0	0	0	0	0	0	1	0	0	0	0	0	1	0
B3gat2	4	0	1	0	0	0	0	0	0	1	1	0	0	0	0	0	0	0	0	0	0	0	0	1	0
Irak2	4	0	1	0	0	1	1	0	0	0	0	0	0	0	0	0	0	0	0	0	0	0	1	0	0
Slc39a14	4	0	1	0	0	0	0	0	0	1	1	0	1	0	0	0	0	0	0	0	0	0	0	0	0
Neurl3	4	0	1	1	0	0	0	0	0	1	1	0	0	0	0	0	0	0	0	0	0	0	0	0	0
Alkbh1	4	0	1	0	0	0	0	0	0	1	0	0	1	1	0	0	0	0	0	0	0	0	0	0	0
Spg7	4	0	0	1	0	0	0	0	0	0	1	0	0	0	0	0	0	0	1	1	0	0	0	0	0
Il17c	4	0	0	1	0	0	0	0	0	0	1	0	0	0	0	0	0	0	1	1	0	0	0	0	0
Bag2	4	0	1	1	0	0	0	0	0	1	1	0	0	0	0	0	0	0	0	0	0	0	0	0	0
Tgfbrap1	4	0	0	1	0	0	0	0	0	1	0	0	1	0	0	0	0	0	0	0	0	0	0	1	0
Tbl1xr1	4	0	0	0	1	1	0	0	0	0	0	0	0	0	0	0	0	0	0	0	0	0	1	0	1
Ffar2	4	0	0	0	0	0	1	0	0	0	1	0	0	0	0	0	0	1	0	0	0	0	0	1	0
Eif5b	4	0	1	1	0	0	0	0	0	1	1	0	0	0	0	0	0	0	0	0	0	0	0	0	0
Adgrb3	4	0	1	0	0	0	0	0	0	1	1	0	0	0	0	0	0	0	0	0	0	0	0	1	0
Gm20388	4	0	0	1	0	0	0	0	0	0	1	0	0	0	0	0	0	0	1	1	0	0	0	0	0
Kirrel2	4	0	0	0	0	0	1	0	0	0	1	0	0	0	0	0	0	1	0	0	0	0	0	1	0
Irf2bpl	4	0	1	0	0	0	0	0	0	1	0	0	1	1	0	0	0	0	0	0	0	0	0	0	0
Arhgef4	4	0	1	1	0	0	0	0	0	1	1	0	0	0	0	0	0	0	0	0	0	0	0	0	0
Lrfn3	4	0	0	0	0	0	1	0	0	0	1	0	0	0	0	0	0	1	0	0	0	0	0	1	0
Vash1	4	0	1	0	0	0	0	0	0	1	0	0	1	1	0	0	0	0	0	0	0	0	0	0	0
Rnf43	4	0	1	1	0	0	0	0	0	1	0	0	1	0	0	0	0	0	0	0	0	0	0	0	0
Lman2l	4	0	1	1	0	0	0	0	0	1	1	0	0	0	0	0	0	0	0	0	0	0	0	0	0
Fam161b	4	0	1	0	0	0	0	0	0	1	0	0	1	1	0	0	0	0	0	0	0	0	0	0	0
Arid5a	4	0	1	1	0	0	0	0	0	1	1	0	0	0	0	0	0	0	0	0	0	0	0	0	0
Cpne9	4	0	1	0	0	1	1	0	0	0	0	0	0	0	0	0	0	0	0	0	0	0	1	0	0
Uggt1	4	0	1	1	0	0	0	0	0	1	1	0	0	0	0	0	0	0	0	0	0	0	0	0	0
Fndc9	4	0	0	0	0	0	0	0	1	0	1	0	1	0	0	0	0	0	0	0	1	0	0	0	0
Rps6kl1	4	0	1	0	0	0	0	0	0	1	0	0	1	1	0	0	0	0	0	0	0	0	0	0	0
Mfsd9	4	0	0	1	0	0	0	0	0	1	0	0	1	0	0	0	0	0	0	0	0	0	0	1	0
Ttll5	4	0	1	0	0	0	0	0	0	1	0	0	1	1	0	0	0	0	0	0	0	0	0	0	0
Sipa1l1	4	0	1	0	0	0	0	0	0	1	0	0	1	1	0	0	0	0	0	0	0	0	0	0	0
Ssu2	4	0	1	0	0	1	1	0	0	0	0	0	0	0	0	0	0	0	0	0	0	0	1	0	0
6430548M08Rik	4	0	0	1	0	0	0	0	0	0	1	0	0	0	0	0	0	0	1	1	0	0	0	0	0
Dpy19l3	4	0	0	0	0	0	1	0	0	0	1	0	0	0	0	0	0	1	0	0	0	0	0	1	0
Ppm1e	4	0	1	1	0	0	0	0	0	1	0	0	1	0	0	0	0	0	0	0	0	0	0	0	0
Ankrd27	4	0	0	0	0	0	1	0	0	0	1	0	0	0	0	0	0	1	0	0	0	0	0	1	0
Ccar2	4	0	1	0	0	0	0	0	0	1	1	0	1	0	0	0	0	0	0	0	0	0	0	0	0
Gm3486	4	0	0	0	0	0	1	0	0	1	0	0	1	0	0	0	0	0	0	1	0	0	0	0	0
Ccdc169	4	0	0	0	0	0	0	0	0	1	1	0	0	1	1	0	0	0	0	0	0	0	0	0	0
Tmem63c	4	0	1	0	0	0	0	0	0	1	0	0	1	1	0	0	0	0	0	0	0	0	0	0	0
Pomt2	4	0	1	0	0	0	0	0	0	1	0	0	1	1	0	0	0	0	0	0	0	0	0	0	0
Bend6	4	0	1	1	0	0	0	0	0	1	1	0	0	0	0	0	0	0	0	0	0	0	0	0	0
Gm3543	4	0	0	0	0	0	1	0	0	1	0	0	1	0	0	0	0	0	0	1	0	0	0	0	0
Susd6	4	0	1	0	0	0	0	0	0	1	0	1	0	1	0	0	0	0	0	0	0	0	0	0	0
Zfp420	4	0	0	0	0	0	1	0	0	0	1	0	0	0	0	0	0	1	0	0	0	0	0	1	0
Nipal4	4	0	0	0	0	0	0	0	1	0	1	0	1	0	0	0	0	0	0	0	1	0	0	0	0
Prrt3	4	0	1	0	0	1	1	0	0	0	0	0	0	0	0	0	0	0	0	0	0	0	1	0	0
Lrit2	4	0	0	0	0	0	0	0	0	1	0	0	1	0	0	0	0	1	0	1	0	0	0	0	0
Spata33	4	0	0	1	0	0	0	0	0	0	1	0	0	0	0	0	0	0	1	1	0	0	0	0	0
Rpl17	4	1	0	0	0	0	1	0	0	0	0	1	0	0	0	0	0	0	0	0	0	1	0	0	0
Ahsa1	4	0	1	0	0	0	0	0	0	1	0	0	1	1	0	0	0	0	0	0	0	0	0	0	0
Spire2	4	0	0	1	0	0	0	0	0	0	1	0	0	0	0	0	0	0	1	1	0	0	0	0	0
Cdk10	4	0	0	1	0	0	0	0	0	0	1	0	0	0	0	0	0	0	1	1	0	0	0	0	0
Map3k9	4	0	1	0	0	0	0	0	0	1	0	0	1	1	0	0	0	0	0	0	0	0	0	0	0
Tspoap1	4	0	1	1	0	0	0	0	0	1	0	0	1	0	0	0	0	0	0	0	0	0	0	0	0
Fancd2	4	0	1	0	0	1	1	0	0	0	0	0	0	0	0	0	0	0	0	0	0	0	1	0	0
Pnma1	4	0	1	0	0	0	0	0	0	1	0	0	1	1	0	0	0	0	0	0	0	0	0	0	0
Zfp940	4	0	0	0	0	0	1	0	0	0	1	0	0	0	0	0	0	1	0	0	0	0	0	1	0
Pdlim2	4	0	1	0	0	0	0	0	0	1	1	0	1	0	0	0	0	0	0	0	0	0	0	0	0
Klhl36	4	0	0	1	0	0	0	0	0	0	1	0	0	0	0	0	0	0	1	1	0	0	0	0	0
Nek9	4	0	1	0	0	0	0	0	0	1	0	0	1	1	0	0	0	0	0	0	0	0	0	0	0
Fermt2	4	0	0	0	0	0	1	0	0	1	0	0	1	0	0	0	0	0	0	1	0	0	0	0	0
Acvr1c	4	0	0	0	0	0	0	0	0	1	1	0	1	0	0	0	0	0	0	0	0	0	0	1	0
Npm2	4	0	1	0	0	0	0	0	0	1	1	0	1	0	0	0	0	0	0	0	0	0	0	0	0
Mgat4a	4	0	1	1	0	0	0	0	0	1	1	0	0	0	0	0	0	0	0	0	0	0	0	0	0
Nudt18	4	0	1	0	0	0	0	0	0	1	1	0	1	0	0	0	0	0	0	0	0	0	0	0	0
Sult5a1	4	0	0	1	0	0	0	0	0	0	1	0	0	0	0	0	0	0	1	1	0	0	0	0	0
Pkd1l2	4	0	0	1	0	0	0	0	0	0	1	0	0	0	0	0	0	0	1	1	0	0	0	0	0
Flvcr2	4	0	1	0	0	0	0	0	0	1	0	0	1	1	0	0	0	0	0	0	0	0	0	0	0
Fam168b	4	0	1	1	0	0	0	0	0	1	1	0	0	0	0	0	0	0	0	0	0	0	0	0	0
Arhgap33	4	0	0	0	0	0	1	0	0	0	1	0	0	0	0	0	0	1	0	0	0	0	0	1	0
Adnp2	4	1	0	0	0	0	1	0	0	0	0	1	1	0	0	0	0	0	0	0	0	0	0	0	0
Acot5	4	0	1	0	0	0	0	0	0	1	0	0	1	1	0	0	0	0	0	0	0	0	0	0	0
Mir142	4	0	1	1	0	0	0	0	0	1	0	0	1	0	0	0	0	0	0	0	0	0	0	0	0
Rnf149	4	0	1	1	0	0	0	0	0	1	1	0	0	0	0	0	0	0	0	0	0	0	0	0	0
U2af1l4	4	0	0	0	0	0	1	0	0	0	1	0	0	0	0	0	0	1	0	0	0	0	0	1	0
Kctd15	4	0	0	0	0	0	1	0	0	0	1	0	0	0	0	0	0	1	0	0	0	0	0	1	0
Mthfsd	4	0	0	1	0	0	0	0	0	0	1	0	0	0	0	0	0	0	1	1	0	0	0	0	0
Lrit1	4	0	0	0	0	0	0	0	0	1	0	0	1	0	0	0	0	1	0	1	0	0	0	0	0
Tas2r104	4	0	1	0	0	0	1	0	0	0	1	1	0	0	0	0	0	0	0	0	0	0	0	0	0
Tas2r105	4	0	1	0	0	0	1	0	0	0	1	1	0	0	0	0	0	0	0	0	0	0	0	0	0
Tas2r106	4	0	1	0	0	0	1	0	0	0	1	1	0	0	0	0	0	0	0	0	0	0	0	0	0
Tas2r107	4	0	1	0	0	0	1	0	0	0	1	1	0	0	0	0	0	0	0	0	0	0	0	0	0
Tas2r114	4	0	1	0	0	0	1	0	0	0	1	1	0	0	0	0	0	0	0	0	0	0	0	0	0
Tas2r130	4	0	1	0	0	0	1	0	0	0	1	1	0	0	0	0	0	0	0	0	0	0	0	0	0
Atmin	4	0	0	1	0	0	0	0	0	0	1	0	0	0	0	0	0	0	1	1	0	0	0	0	0
Gm2056	4	0	1	0	0	0	0	0	0	1	0	0	1	1	0	0	0	0	0	0	0	0	0	0	0
Ffar1	4	0	0	0	0	0	1	0	0	0	1	0	0	0	0	0	0	1	0	0	0	0	0	1	0
Zfyve1	4	0	1	0	0	0	0	0	0	1	0	0	1	1	0	0	0	0	0	0	0	0	0	0	0
Amer3	4	0	1	1	0	0	0	0	0	1	1	0	0	0	0	0	0	0	0	0	0	0	0	0	0
Zfp469	4	0	0	1	0	0	0	0	0	0	1	0	0	0	0	0	0	0	1	1	0	0	0	0	0
Tsga10	4	0	1	1	0	0	0	0	0	1	1	0	0	0	0	0	0	0	0	0	0	0	0	0	0
1700001J03Rik	4	0	0	1	0	0	1	0	0	0	0	0	0	0	0	0	0	1	0	0	0	0	0	1	0
Elmsan1	4	0	1	0	0	0	0	0	0	1	0	0	1	1	0	0	0	0	0	0	0	0	0	0	0
Syndig1l	4	0	1	0	0	0	0	0	0	1	0	0	1	1	0	0	0	0	0	0	0	0	0	0	0
Zdhhc22	4	0	1	0	0	0	0	0	0	1	0	0	1	1	0	0	0	0	0	0	0	0	0	0	0
Samd15	4	0	1	0	0	0	0	0	0	1	0	0	1	1	0	0	0	0	0	0	0	0	0	0	0
Ism2	4	0	1	0	0	0	0	0	0	1	0	0	1	1	0	0	0	0	0	0	0	0	0	0	0
Ffar3	4	0	0	0	0	0	1	0	0	0	1	0	0	0	0	0	0	1	0	0	0	0	0	1	0
Hspb6	4	0	0	0	0	0	1	0	0	0	1	0	0	0	0	0	0	1	0	0	0	0	0	1	0
Slc38a8	4	0	0	1	0	0	0	0	0	0	1	0	0	0	0	0	0	0	1	1	0	0	0	0	0
Hsf5	4	0	1	1	0	0	0	0	0	1	0	0	1	0	0	0	0	0	0	0	0	0	0	0	0
Lyg2	4	0	1	1	0	0	0	0	0	1	1	0	0	0	0	0	0	0	0	0	0	0	0	0	0
Arhgap33os	4	0	0	0	0	0	1	0	0	0	1	0	0	0	0	0	0	1	0	0	0	0	0	1	0
Pabpn1l	4	0	0	1	0	0	0	0	0	0	1	0	0	0	0	0	0	0	1	1	0	0	0	0	0
Ccdc177	4	0	1	0	0	0	0	0	0	1	0	1	0	1	0	0	0	0	0	0	0	0	0	0	0
Olfr462	4	0	1	1	0	0	0	0	0	1	0	0	1	0	0	0	0	0	0	0	0	0	0	0	0
Olfr464	4	0	1	1	0	0	0	0	0	1	0	0	1	0	0	0	0	0	0	0	0	0	0	0	0
Zfp82	4	0	0	0	0	0	1	0	0	0	1	0	0	0	0	0	0	1	0	0	0	0	0	1	0
Plekhd1	4	0	1	0	0	0	0	0	0	1	0	1	0	1	0	0	0	0	0	0	0	0	0	0	0
Trim55	4	0	0	0	1	1	0	0	0	0	0	0	0	0	0	0	0	0	0	0	0	0	1	0	1
Fam160b2	4	0	1	0	0	0	0	0	0	1	1	0	1	0	0	0	0	0	0	0	0	0	0	0	0
Ccdc148	4	0	0	0	0	0	0	0	0	1	1	0	1	0	0	0	0	0	0	0	0	0	0	1	0
BC031181	4	1	0	0	0	0	1	0	0	0	0	1	0	0	0	0	0	0	0	0	0	1	0	0	0
Nfkbid	4	0	0	0	0	0	1	0	0	0	1	0	0	0	0	0	0	1	0	0	0	0	0	1	0
Synb	4	0	1	0	0	0	0	0	0	1	1	0	1	0	0	0	0	0	0	0	0	0	0	0	0
Lin52	4	0	1	0	0	0	0	0	0	1	0	0	1	1	0	0	0	0	0	0	0	0	0	0	0
Prb1	4	0	1	0	0	0	1	0	0	0	1	1	0	0	0	0	0	0	0	0	0	0	0	0	0
Proser3	4	0	0	0	0	0	1	0	0	0	1	0	0	0	0	0	0	1	0	0	0	0	0	1	0
Lhfpl4	4	0	1	0	0	1	1	0	0	0	0	0	0	0	0	0	0	0	0	0	0	0	1	0	0
Ang5	4	0	0	0	0	0	1	0	0	1	0	0	1	0	0	0	0	0	0	1	0	0	0	0	0
Tatdn2	4	0	1	0	0	1	1	0	0	0	0	0	0	0	0	0	0	0	0	0	0	0	1	0	0
Nms	4	0	1	1	0	0	0	0	0	1	1	0	0	0	0	0	0	0	0	0	0	0	0	0	0
Mks1	4	0	1	1	0	0	0	0	0	1	0	0	1	0	0	0	0	0	0	0	0	0	0	0	0
Lrp3	4	0	0	0	0	0	1	0	0	0	1	0	0	0	0	0	0	1	0	0	0	0	0	1	0
Vrtn	4	0	1	0	0	0	0	0	0	1	0	0	1	1	0	0	0	0	0	0	0	0	0	0	0
Zfp382	4	0	0	0	0	0	1	0	0	0	1	0	0	0	0	0	0	1	0	0	0	0	0	1	0
Fam92b	4	0	0	1	0	0	0	0	0	0	1	0	0	0	0	0	0	0	1	1	0	0	0	0	0
Piezo1	4	0	0	1	0	0	0	0	0	0	1	0	0	0	0	0	0	0	1	1	0	0	0	0	0
Sertm1	4	0	0	0	0	0	0	0	0	1	1	0	0	1	1	0	0	0	0	0	0	0	0	0	0
Fer1l5	4	0	1	1	0	0	0	0	0	1	1	0	0	0	0	0	0	0	0	0	0	0	0	0	0
Mir30c-2	4	0	1	0	0	0	0	0	0	1	1	0	0	0	0	0	0	0	0	0	0	0	0	1	0
Mir320	4	0	1	0	0	0	0	0	0	1	1	0	1	0	0	0	0	0	0	0	0	0	0	0	0
Igflr1	4	0	0	0	0	0	1	0	0	0	1	0	0	0	0	0	0	1	0	0	0	0	0	1	0
Gm42417	4	0	1	1	0	0	0	0	0	1	1	0	0	0	0	0	0	0	0	0	0	0	0	0	0
Gm5930	4	0	0	0	0	0	1	0	0	1	0	0	1	0	0	0	0	0	0	1	0	0	0	0	0
Gm8300	4	0	1	0	0	0	0	0	0	1	0	0	1	1	0	0	0	0	0	0	0	0	0	0	0
Gm8332	4	0	1	0	0	0	0	0	0	1	0	0	1	1	0	0	0	0	0	0	0	0	0	0	0
Gm8257	4	0	0	0	0	0	1	0	0	1	0	0	1	0	0	0	0	0	0	1	0	0	0	0	0
Gm6482	4	0	0	0	0	0	1	0	0	1	0	0	1	0	0	0	0	0	0	1	0	0	0	0	0
Gm8247	4	0	0	0	0	0	1	0	0	1	0	0	1	0	0	0	0	0	0	1	0	0	0	0	0
Lipt1	4	0	1	1	0	0	0	0	0	1	1	0	0	0	0	0	0	0	0	0	0	0	0	0	0
Gm6401	4	0	0	0	0	0	1	0	0	1	0	0	1	0	0	0	0	0	0	1	0	0	0	0	0
Gm8882	4	0	1	0	0	0	1	0	0	0	1	1	0	0	0	0	0	0	0	0	0	0	0	0	0
Gm7929	4	0	0	0	0	0	1	0	0	1	0	0	1	0	0	0	0	0	0	1	0	0	0	0	0
Gm8082	4	0	0	0	0	0	1	0	0	1	0	0	1	0	0	0	0	0	0	1	0	0	0	0	0
Gm7945	4	0	0	0	0	0	1	0	0	1	0	0	1	0	0	0	0	0	0	1	0	0	0	0	0
Lrrc74a	4	0	1	0	0	0	0	0	0	1	0	0	1	1	0	0	0	0	0	0	0	0	0	0	0
Gm7324	4	0	0	0	0	0	1	0	0	1	0	0	1	0	0	0	0	0	0	1	0	0	0	0	0
Gm16368	4	0	1	0	0	0	0	0	0	1	0	0	1	1	0	0	0	0	0	0	0	0	0	0	0
Gm8138	4	0	0	0	0	0	1	0	0	1	0	0	1	0	0	0	0	0	0	1	0	0	0	0	0
Gm5788	4	0	1	0	0	0	0	0	0	1	0	0	1	1	0	0	0	0	0	0	0	0	0	0	0
Gm5039	4	0	1	0	0	0	0	0	0	1	0	0	1	1	0	0	0	0	0	0	0	0	0	0	0
Scgb1b17	4	0	0	0	0	0	1	0	0	0	1	0	0	0	0	0	0	1	0	0	0	0	0	1	0
Gm16381	4	0	1	0	0	0	0	0	0	1	0	0	1	1	0	0	0	0	0	0	0	0	0	0	0
Gm8122	4	0	0	0	0	0	1	0	0	1	0	0	1	0	0	0	0	0	0	1	0	0	0	0	0
Gm7954	4	0	0	0	0	0	1	0	0	1	0	0	1	0	0	0	0	0	0	1	0	0	0	0	0
Gm8113	4	0	0	0	0	0	1	0	0	1	0	0	1	0	0	0	0	0	0	1	0	0	0	0	0
Gm49366	4	0	1	0	0	0	0	0	0	1	0	0	1	1	0	0	0	0	0	0	0	0	0	0	0
Scgb1b24	4	0	0	0	0	0	1	0	0	0	1	0	0	0	0	0	0	1	0	0	0	0	0	1	0
Gm12166	4	0	0	0	0	0	0	0	1	0	1	0	1	0	0	0	0	0	0	0	1	0	0	0	0
Acp1	3	0	1	0	0	0	0	1	0	0	0	0	1	0	0	0	0	0	0	0	0	0	0	0	0
Acta1	3	0	0	1	0	0	0	0	0	0	1	0	0	0	0	0	0	0	1	0	0	0	0	0	0
Agt	3	0	0	1	0	0	0	0	0	0	1	0	0	0	0	0	0	0	1	0	0	0	0	0	0
Alpl	3	0	1	0	0	0	0	0	0	0	1	0	1	0	0	0	0	0	0	0	0	0	0	0	0
Ang	3	0	0	0	0	0	1	0	0	0	1	0	0	0	0	0	0	0	0	1	0	0	0	0	0
Apeh	3	0	0	0	0	0	0	0	0	0	0	0	1	0	0	0	0	1	1	0	0	0	0	0	0
Apex1	3	0	0	0	0	0	1	0	0	0	1	0	0	0	0	0	0	0	0	1	0	0	0	0	0
Zfp984	3	0	1	0	0	0	0	0	0	0	1	0	1	0	0	0	0	0	0	0	0	0	0	0	0
Zfp988	3	0	1	0	0	0	0	0	0	0	1	0	1	0	0	0	0	0	0	0	0	0	0	0	0
Atp5a1	3	1	0	0	0	0	1	0	0	0	0	1	0	0	0	0	0	0	0	0	0	0	0	0	0
Zbtb12	3	1	0	0	0	1	0	0	0	0	0	0	0	0	0	0	0	0	0	0	0	0	1	0	0
C1qa	3	0	1	0	0	0	0	0	0	0	1	0	1	0	0	0	0	0	0	0	0	0	0	0	0
C1qb	3	0	1	0	0	0	0	0	0	0	1	0	1	0	0	0	0	0	0	0	0	0	0	0	0
C1qc	3	0	1	0	0	0	0	0	0	0	1	0	1	0	0	0	0	0	0	0	0	0	0	0	0
C2	3	1	0	0	0	1	0	0	0	0	0	0	0	0	0	0	0	0	0	0	0	0	1	0	0
[truncated: 9,107 more rows]

## Sheet: PheWAS Bicluster Modularity
		Community	Modularity Score
		module1	0.103107
		module2	0.032926
		module3	0.027803
		module4	0.047373
		module5	0.042337
		module6	0.052303
		module7	0.047754
		module8	0.083067

## Sheet: PheWAS Pleio and Polygen
Name	degree	Class	Community			grooming1_humanphewas_ouc6_ (2)
FOXP1	35	pleiotropy	#REF!
SOX5	33	pleiotropy	#REF!
RANGAP1	31	pleiotropy	#REF!
ZC3H7B	27	pleiotropy	#REF!
EP300	23	pleiotropy	#REF!
L3MBTL2	23	pleiotropy	#REF!
SUN2	21	pleiotropy	#REF!
CCDC134	19	pleiotropy	#REF!
MEI1	19	pleiotropy	#REF!
POLR3H	19	pleiotropy	#REF!
TOB2	19	pleiotropy	#REF!
GRIN2B	18	pleiotropy	#REF!
ACO2	18	pleiotropy	#REF!
PHF5A	18	pleiotropy	#REF!
CACNA1E	17	pleiotropy	#REF!
CSDC2	17	pleiotropy	#REF!
MAGI1	16	pleiotropy	#REF!
TRAPPC9	16	pleiotropy	#REF!
FAM227A	16	pleiotropy	#REF!
TCF20	16	pleiotropy	#REF!
TEF	16	pleiotropy	#REF!
ZNF445	16	pleiotropy	#REF!
CHMP3	15	pleiotropy	#REF!
TOMM22	15	pleiotropy	#REF!
GTPBP1	14	pleiotropy	#REF!
CTNNA2	13	pleiotropy	#REF!
ZKSCAN7	13	pleiotropy	#REF!
LRRTM4	13	pleiotropy	#REF!
CBY1	13	pleiotropy	#REF!
FBXO38	13	pleiotropy	#REF!
KDM3A	13	pleiotropy	#REF!
ARPP21	13	pleiotropy	#REF!
ST8SIA1	13	pleiotropy	#REF!
ANO10	13	pleiotropy	#REF!
CHSY3	13	pleiotropy	#REF!
RBMS3	12	pleiotropy	#REF!
PRICKLE2	12	pleiotropy	#REF!
EXOG	12	pleiotropy	#REF!
PTK2	12	pleiotropy	#REF!
ACVR2B	11	pleiotropy	#REF!
SMARCC1	11	pleiotropy	#REF!
CACNA1I	11	pleiotropy	#REF!
CHADL	10	pleiotropy	#REF!
XPNPEP3	10	pleiotropy	#REF!
AGO2	10	pleiotropy	#REF!
PACSIN2	10	pleiotropy	#REF!
SREBF2	10	pleiotropy	#REF!
CTNNB1	10	pleiotropy	#REF!
DHX30	10	pleiotropy	#REF!
MGAT3	10	pleiotropy	#REF!
ASTN1	9	pleiotropy	#REF!
SUCLG2	9	pleiotropy	#REF!
JOSD1	9	pleiotropy	#REF!
MIEF1	8	pleiotropy	#REF!
RBX1	8	pleiotropy	#REF!
CD8A	8	pleiotropy	#REF!
CSPG5	8	pleiotropy	#REF!
TNRC6B	8	pleiotropy	#REF!
FAM135B	7	pleiotropy	#REF!
PAIP2B	7	pleiotropy	#REF!
SLC45A4	7	pleiotropy	#REF!
PLEC	7	pleiotropy	#REF!
NDST1	7	pleiotropy	#REF!
XYLB	7	pleiotropy	#REF!
SPINK7	7	pleiotropy	#REF!
TOPAZ1	7	pleiotropy	#REF!
ZNF638	7	pleiotropy	#REF!
MCHR1	7	pleiotropy	#REF!
TRANK1	7	pleiotropy	#REF!
SMC1B	7	pleiotropy	#REF!
SLC15A5	7	pleiotropy	#REF!
LY6H	7	pleiotropy	#REF!
COL22A1	6	pleiotropy	#REF!
IQSEC1	6	pleiotropy	#REF!
PIEZO2	6	pleiotropy	#REF!
MPPED1	6	pleiotropy	#REF!
RBFOX2	6	pleiotropy	#REF!
CAMK2A	6	pleiotropy	#REF!
CNTN6	6	pleiotropy	#REF!
ITGA9	6	pleiotropy	#REF!
KIFC2	6	pleiotropy	#REF!
KCNJ4	6	pleiotropy	#REF!
SFXN5	6	pleiotropy	#REF!
TCAIM	6	pleiotropy	#REF!
ARC	6	pleiotropy	#REF!
SNRK	6	pleiotropy	#REF!
MAP4	6	pleiotropy	#REF!
KCNMB2	6	pleiotropy	#REF!
NDUFA6	6	pleiotropy	#REF!
ELP6	6	pleiotropy	#REF!
KIF9	6	pleiotropy	#REF!
KLHL18	6	pleiotropy	#REF!
HHATL	6	pleiotropy	#REF!
MECOM	5	pleiotropy	#REF!
FRMD4B	5	pleiotropy	#REF!
ARSI	5	pleiotropy	#REF!
OSBPL10	5	pleiotropy	#REF!
SH3TC2	5	pleiotropy	#REF!
WBP11	5	pleiotropy	#REF!
ITPR2	5	pleiotropy	#REF!
ARFGAP3	5	pleiotropy	#REF!
SMDT1	5	pleiotropy	#REF!
FBN2	5	pleiotropy	#REF!
SEC11C	5	pleiotropy	#REF!
MITF	5	pleiotropy	#REF!
KIF15	5	pleiotropy	#REF!
TMEM42	5	pleiotropy	#REF!
RGS16	5	pleiotropy	#REF!
DMC1	5	pleiotropy	#REF!
ABHD5	5	pleiotropy	#REF!
MYRIP	5	pleiotropy	#REF!
CLDN11	5	pleiotropy	#REF!
TRIOBP	5	pleiotropy	#REF!
CTDSPL	5	pleiotropy	#REF!
CCBE1	4	pleiotropy	#REF!
DNAL4	4	pleiotropy	#REF!
PARP10	4	pleiotropy	#REF!
PDCD6IP	4	pleiotropy	#REF!
FBLN2	4	pleiotropy	#REF!
GADL1	4	pleiotropy	#REF!
LDLRAD4	4	pleiotropy	#REF!
ONECUT2	4	pleiotropy	#REF!
PDE3A	4	pleiotropy	#REF!
PDZRN3	4	pleiotropy	#REF!
RGL1	4	pleiotropy	#REF!
TGFBR2	4	pleiotropy	#REF!
PLD1	4	pleiotropy	#REF!
BHLHE41	4	pleiotropy	#REF!
KCNK9	4	pleiotropy	#REF!
MC4R	4	pleiotropy	#REF!
PMM1	4	pleiotropy	#REF!
TET3	4	pleiotropy	#REF!
XRCC6	4	pleiotropy	#REF!
KHDRBS3	4	pleiotropy	#REF!
CDC25A	4	pleiotropy	#REF!
FOXH1	4	pleiotropy	#REF!
GCAT	4	pleiotropy	#REF!
SSPN	4	pleiotropy	#REF!
NAGA	4	pleiotropy	#REF!
SCRIB	4	pleiotropy	#REF!
PLBD1	4	pleiotropy	#REF!
ADAMTS19	4	pleiotropy	#REF!
MLH1	4	pleiotropy	#REF!
PHF21B	4	pleiotropy	#REF!
SLC7A14	4	pleiotropy	#REF!
ZNF250	4	pleiotropy	#REF!
TAB1	4	pleiotropy	#REF!
FAM118A	4	pleiotropy	#REF!
NFAM1	4	pleiotropy	#REF!
PTPN23	4	pleiotropy	#REF!
SCAP	4	pleiotropy	#REF!
SKIL	4	pleiotropy	#REF!
WBP2NL	4	pleiotropy	#REF!
NBEAL2	4	pleiotropy	#REF!
SETD2	4	pleiotropy	#REF!
CCDC51	4	pleiotropy	#REF!
CTXN3	4	pleiotropy	#REF!
DDX17	4	pleiotropy	#REF!
EOGT	4	pleiotropy	#REF!
ETNK1	4	pleiotropy	#REF!
NOL12	4	pleiotropy	#REF!
TMEM43	4	pleiotropy	#REF!
EIF4E3	4	pleiotropy	#REF!
TTLL1	4	pleiotropy	#REF!
IER5	4	pleiotropy	#REF!
RGS8	4	pleiotropy	#REF!
MAPK15	4	pleiotropy	#REF!
ALDH7A1	3	pleiotropy	#REF!
STK38L	3	pleiotropy	#REF!
CRTAP	3	pleiotropy	#REF!
PVALB	3	pleiotropy	#REF!
ACTG2	3	pleiotropy	#REF!
ETV6	3	pleiotropy	#REF!
TNIK	3	pleiotropy	#REF!
CMTM7	3	pleiotropy	#REF!
TSTA3	3	pleiotropy	#REF!
SERHL2	3	pleiotropy	#REF!
FAT4	3	pleiotropy	#REF!
ST13	3	pleiotropy	#REF!
BRINP2	3	pleiotropy	#REF!
IMMT	3	pleiotropy	#REF!
PLEKHA5	3	pleiotropy	#REF!
RHPN1	3	pleiotropy	#REF!
EVA1A	3	pleiotropy	#REF!
TACR1	3	pleiotropy	#REF!
ADSL	3	pleiotropy	#REF!
DNAJB7	3	pleiotropy	#REF!
EPM2AIP1	3	pleiotropy	#REF!
GRINA	3	pleiotropy	#REF!
SLC25A17	3	pleiotropy	#REF!
CSNK1E	3	pleiotropy	#REF!
DYNC1LI1	3	pleiotropy	#REF!
KIAA0930	3	pleiotropy	#REF!
PPARGC1B	3	pleiotropy	#REF!
RNASEL	3	pleiotropy	#REF!
MB	3	pleiotropy	#REF!
MOBP	3	pleiotropy	#REF!
WDR7	3	pleiotropy	#REF!
ZNF35	3	pleiotropy	#REF!
ULK4	3	pleiotropy	#REF!
SLC25A38	3	pleiotropy	#REF!
SCN5A	3	pleiotropy	#REF!
XIRP1	3	pleiotropy	#REF!
FGFR1OP2	3	pleiotropy	#REF!
MGST1	3	pleiotropy	#REF!
SLC2A2	3	pleiotropy	#REF!
BAIAP2L2	3	pleiotropy	#REF!
CCR8	3	pleiotropy	#REF!
LYNX1	3	pleiotropy	#REF!
TMEM184B	3	pleiotropy	#REF!
ADRB2	3	pleiotropy	#REF!
CHCHD4	3	pleiotropy	#REF!
EXOC6B	3	pleiotropy	#REF!
MICALL1	3	pleiotropy	#REF!
RASSF8	3	pleiotropy	#REF!
MRPL35	3	pleiotropy	#REF!
KDELR3	3	pleiotropy	#REF!
SLCO1C1	3	pleiotropy	#REF!
PARVG	3	pleiotropy	#REF!
SHISA8	3	pleiotropy	#REF!
TNFRSF13C	3	pleiotropy	#REF!
GPR160	3	pleiotropy	#REF!
TMPPE	3	pleiotropy	#REF!
NRBP2	3	pleiotropy	#REF!
LY6K	3	pleiotropy	#REF!
EOMES	3	pleiotropy	#REF!
EIF5A2	3	pleiotropy	#REF!
CENPM	3	pleiotropy	#REF!
EMX1	3	pleiotropy	#REF!
FAM83H	3	pleiotropy	#REF!
CACNG2	2	pleiotropy	#REF!
ADAMTS9	2	pleiotropy	#REF!
CDCP1	2	pleiotropy	#REF!
CMTM8	2	pleiotropy	#REF!
NEDD4L	2	pleiotropy	#REF!
PARVB	2	pleiotropy	#REF!
PLA2G6	2	pleiotropy	#REF!
PPFIBP1	2	pleiotropy	#REF!
SMCO3	2	pleiotropy	#REF!
SWT1	2	pleiotropy	#REF!
TDGF1	2	pleiotropy	#REF!
TRAK1	2	pleiotropy	#REF!
ABLIM3	2	pleiotropy	#REF!
PRG4	2	pleiotropy	#REF!
STX6	2	pleiotropy	#REF!
ZCWPW2	2	pleiotropy	#REF!
ZNF251	2	pleiotropy	#REF!
CNTN3	2	pleiotropy	#REF!
COL7A1	2	pleiotropy	#REF!
DESI1	2	pleiotropy	#REF!
HK2	2	pleiotropy	#REF!
HTR4	2	pleiotropy	#REF!
LRP6	2	pleiotropy	#REF!
MAT2A	2	pleiotropy	#REF!
POLDIP3	2	pleiotropy	#REF!
SLC6A7	2	pleiotropy	#REF!
TXNL1	2	pleiotropy	#REF!
GNAL	2	pleiotropy	#REF!
SUCLG1	2	pleiotropy	#REF!
LMO3	2	pleiotropy	#REF!
EFCAB6	2	pleiotropy	#REF!
NME6	2	pleiotropy	#REF!
SPINK8	2	pleiotropy	#REF!
PPP1R16A	2	pleiotropy	#REF!
PUF60	2	pleiotropy	#REF!
SLC27A6	2	pleiotropy	#REF!
CYB5R3	2	pleiotropy	#REF!
KIAA1143	2	pleiotropy	#REF!
LRRFIP2	2	pleiotropy	#REF!
PSMG2	2	pleiotropy	#REF!
RETSAT	2	pleiotropy	#REF!
ZNF7	2	pleiotropy	#REF!
FAM210A	2	pleiotropy	#REF!
GLUL	2	pleiotropy	#REF!
NCF2	2	pleiotropy	#REF!
TEDDM1	2	pleiotropy	#REF!
ENTPD3	2	pleiotropy	#REF!
MEGF10	2	pleiotropy	#REF!
TCF7L1	2	pleiotropy	#REF!
SLC41A3	2	pleiotropy	#REF!
SMG7	2	pleiotropy	#REF!
CCDC91	2	pleiotropy	#REF!
COG6	2	pleiotropy	#REF!
ACTRT3	2	pleiotropy	#REF!
BOP1	2	pleiotropy	#REF!
EEF1D	2	pleiotropy	#REF!
ST8SIA3	2	pleiotropy	#REF!
ZNF648	2	pleiotropy	#REF!
DGUOK	2	pleiotropy	#REF!
NMNAT2	2	pleiotropy	#REF!
CCDC166	2	pleiotropy	#REF!
SLC16A8	2	pleiotropy	#REF!
SLC25A26	2	pleiotropy	#REF!
ARNTL2	2	pleiotropy	#REF!
GYS2	2	pleiotropy	#REF!
CCDC12	2	pleiotropy	#REF!
CYHR1	2	pleiotropy	#REF!
EIF3L	2	pleiotropy	#REF!
LRRC24	2	pleiotropy	#REF!
LSM3	2	pleiotropy	#REF!
MFSD3	2	pleiotropy	#REF!
RECQL4	2	pleiotropy	#REF!
GUCY2C	2	pleiotropy	#REF!
RPS19BP1	2	pleiotropy	#REF!
TRMT1L	2	pleiotropy	#REF!
CD74	2	pleiotropy	#REF!
EXOSC7	2	pleiotropy	#REF!
PTPRO	2	pleiotropy	#REF!
FGD5	2	pleiotropy	#REF!
SLC26A2	2	pleiotropy	#REF!
SEC62	2	pleiotropy	#REF!
CBX6	2	pleiotropy	#REF!
PRSS50	2	pleiotropy	#REF!
RPSA	2	pleiotropy	#REF!
PHC3	2	pleiotropy	#REF!
TMA7	2	pleiotropy	#REF!
C1QTNF6	2	pleiotropy	#REF!
ALPK2	2	pleiotropy	#REF!
AFAP1L1	2	pleiotropy	#REF!
EPPK1	2	pleiotropy	#REF!
VAMP5	2	pleiotropy	#REF!
ENTHD1	2	pleiotropy	#REF!
KLHL40	2	pleiotropy	#REF!
RPL22L1	2	pleiotropy	#REF!
NPL	2	pleiotropy	#REF!
SAMM50	2	pleiotropy	#REF!
PSCA	2	pleiotropy	#REF!
SGSM3	2	pleiotropy	#REF!
SLURP1	2	pleiotropy	#REF!
THEM6	2	pleiotropy	#REF!
CYP26B1	2	pleiotropy	#REF!
FBXL2	2	pleiotropy	#REF!
IL17B	2	pleiotropy	#REF!
UBP1	2	pleiotropy	#REF!
TCOF1	2	pleiotropy	#REF!
FECH	1	pleiotropy	#REF!
TTC21A	1	pleiotropy	#REF!
WDR48	1	pleiotropy	#REF!
GRAP2	1	pleiotropy	#REF!
SLC39A4	1	pleiotropy	#REF!
TTLL12	1	pleiotropy	#REF!
GPD1L	1	pleiotropy	#REF!
EPS8	1	pleiotropy	#REF!
APOLD1	1	pleiotropy	#REF!
CDC42EP1	1	pleiotropy	#REF!
GLB1	1	pleiotropy	#REF!
GSDMD	1	pleiotropy	#REF!
LGALS2	1	pleiotropy	#REF!
LYPD2	1	pleiotropy	#REF!
MANSC1	1	pleiotropy	#REF!
MYH9	1	pleiotropy	#REF!
NUP210	1	pleiotropy	#REF!
PLA2G4A	1	pleiotropy	#REF!
MROH1	1	pleiotropy	#REF!
RGSL1	1	pleiotropy	#REF!
A4GALT	1	pleiotropy	#REF!
BCL2L14	1	pleiotropy	#REF!
PIK3C2G	1	pleiotropy	#REF!
SCUBE1	1	pleiotropy	#REF!
TREX1	1	pleiotropy	#REF!
ADCK5	1	pleiotropy	#REF!
CCDC174	1	pleiotropy	#REF!
CAPG	1	pleiotropy	#REF!
GPIHBP1	1	pleiotropy	#REF!
CPLX4	1	pleiotropy	#REF!
KIAA1614	1	pleiotropy	#REF!
RPL8	1	pleiotropy	#REF!
LMAN1	1	pleiotropy	#REF!
MRPL19	1	pleiotropy	#REF!
CYP11B1	1	pleiotropy	#REF!
SLC22A13	1	pleiotropy	#REF!
MOB1A	1	pleiotropy	#REF!
PDGFB	1	pleiotropy	#REF!
PDGFRB	1	pleiotropy	#REF!
ZFP41	1	pleiotropy	#REF!
CIDEA	1	pleiotropy	#REF!
LIMD1	1	pleiotropy	#REF!
PDC	1	pleiotropy	#REF!
RNF103	1	pleiotropy	#REF!
SLC6A6	1	pleiotropy	#REF!
TSEN15	1	pleiotropy	#REF!
EIF1B	1	pleiotropy	#REF!
MGP	1	pleiotropy	#REF!
PTCD3	1	pleiotropy	#REF!
RPL14	1	pleiotropy	#REF!
SLCO1A2	1	pleiotropy	#REF!
MYNN	1	pleiotropy	#REF!
PROSER1	1	pleiotropy	#REF!
LRRTM1	1	pleiotropy	#REF!
TIGD5	1	pleiotropy	#REF!
TM7SF3	1	pleiotropy	#REF!
ARHGEF37	1	pleiotropy	#REF!
PTHLH	1	pleiotropy	#REF!
ANKRD53	1	pleiotropy	#REF!
DERA	1	pleiotropy	#REF!
TEX261	1	pleiotropy	#REF!
LDHB	1	pleiotropy	#REF!
LRIG1	1	pleiotropy	#REF!
MAFF	1	pleiotropy	#REF!
LRRC2	1	pleiotropy	#REF!
MPPE1	1	pleiotropy	#REF!
CAMP	1	pleiotropy	#REF!
GPT	1	pleiotropy	#REF!
LAMC1	1	pleiotropy	#REF!
LRRC14	1	pleiotropy	#REF!
MAFA	1	pleiotropy	#REF!
PICK1	1	pleiotropy	#REF!
POLR2F	1	pleiotropy	#REF!
SOX10	1	pleiotropy	#REF!
SUSD5	1	pleiotropy	#REF!
LTF	1	pleiotropy	#REF!
TOP1MT	1	pleiotropy	#REF!
RYBP	1	pleiotropy	#REF!
ALS2CL	1	pleiotropy	#REF!
ATF4	1	pleiotropy	#REF!
KBTBD8	1	pleiotropy	#REF!
LRRC31	1	pleiotropy	#REF!
LRRIQ4	1	pleiotropy	#REF!
PTGS2	1	pleiotropy	#REF!
RNF2	1	pleiotropy	#REF!
PNPLA5	1	pleiotropy	#REF!
SPATC1	1	pleiotropy	#REF!
CXCR6	1	pleiotropy	#REF!
LZTFL1	1	pleiotropy	#REF!
CLEC3B	1	pleiotropy	#REF!
ACKR2	1	pleiotropy	#REF!
CYP8B1	1	pleiotropy	#REF!
RPS14	1	pleiotropy	#REF!
CMC1	1	pleiotropy	#REF!
DCTN1	1	pleiotropy	#REF!
GOLGA4	1	pleiotropy	#REF!
OXSR1	1	pleiotropy	#REF!
PROK2	1	pleiotropy	#REF!
USP39	1	pleiotropy	#REF!
ATOH8	1	pleiotropy	#REF!
SHISA5	1	pleiotropy	#REF!
CSNK1A1	1	pleiotropy	#REF!
MR1	1	pleiotropy	#REF!
IMPA2	1	pleiotropy	#REF!
SHQ1	1	pleiotropy	#REF!
MTHFD2	1	pleiotropy	#REF!
TRIM71	1	pleiotropy	#REF!
TXN2	1	pleiotropy	#REF!
WDR54	1	pleiotropy	#REF!
ATF7IP	1	pleiotropy	#REF!
ABCC9	1	pleiotropy	#REF!
ARHGAP8	1	pleiotropy	#REF!
BCAT1	1	pleiotropy	#REF!
GXYLT2	1	pleiotropy	#REF!
IL2RB	1	pleiotropy	#REF!
PRKCI	1	pleiotropy	#REF!
SPIRE1	1	pleiotropy	#REF!
UBA3	1	pleiotropy	#REF!
ATRIP	1	pleiotropy	#REF!
CCK	1	pleiotropy	#REF!
SULT4A1	1	pleiotropy	#REF!
HMCN1	1	pleiotropy	#REF!
IFT27	1	pleiotropy	#REF!
MROH6	1	pleiotropy	#REF!
ART4	1	pleiotropy	#REF!
MALT1	1	pleiotropy	#REF!
MRPS35	1	pleiotropy	#REF!
PPP4R2	1	pleiotropy	#REF!
PHAX	1	pleiotropy	#REF!
CEP76	1	pleiotropy	#REF!
M1AP	1	pleiotropy	#REF!
ARHGDIB	1	pleiotropy	#REF!
PRR5	1	pleiotropy	#REF!
REG3A	1	pleiotropy	#REF!
TRH	1	pleiotropy	#REF!
MC2R	1	pleiotropy	#REF!
TMIE	1	pleiotropy	#REF!
SLC6A20	1	pleiotropy	#REF!
MED21	1	pleiotropy	#REF!
PLCZ1	1	pleiotropy	#REF!
CYTH4	1	pleiotropy	#REF!
CCR4	1	pleiotropy	#REF!
PNPLA3	1	pleiotropy	#REF!
CHL1	1	pleiotropy	#REF!
SMYD1	1	pleiotropy	#REF!
DDX47	1	pleiotropy	#REF!
NUP50	1	pleiotropy	#REF!
PCYOX1L	1	pleiotropy	#REF!
STAC	1	pleiotropy	#REF!
STAMBP	1	pleiotropy	#REF!
DUSP16	1	pleiotropy	#REF!
TMEM158	1	pleiotropy	#REF!
CSF1R	1	pleiotropy	#REF!
HMGXB3	1	pleiotropy	#REF!
RERG	1	pleiotropy	#REF!
AEBP2	1	pleiotropy	#REF!
ANKRD54	1	pleiotropy	#REF!
SYNGR1	1	pleiotropy	#REF!
TEX33	1	pleiotropy	#REF!
ZNF623	1	pleiotropy	#REF!
RERGL	1	pleiotropy	#REF!
DGAT1	1	pleiotropy	#REF!
GOLT1B	1	pleiotropy	#REF!
UCN2	1	pleiotropy	#REF!
GGCX	1	pleiotropy	#REF!
VAMP8	1	pleiotropy	#REF!
KRAS	1	pleiotropy	#REF!
ATP6V1B1	1	pleiotropy	#REF!
POLE4	1	pleiotropy	#REF!
CEP192	1	pleiotropy	#REF!
CREBL2	1	pleiotropy	#REF!
SH3BP1	1	pleiotropy	#REF!
VAX2	1	pleiotropy	#REF!
ZC3H3	1	pleiotropy	#REF!
Schizophrenia	79	polygenicity	#REF!
Ever vs never smokers	67	polygenicity	#REF!
Neuroticism	63	polygenicity	#REF!
Alcohol intake frequency	62	polygenicity	#REF!
Alcohol dependence	60	polygenicity	#REF!
Schizophrenia vs Bipolar disorder	58	polygenicity	#REF!
Chronotype	53	polygenicity	#REF!
Schizophrenia/Bipolar disorder	53	polygenicity	#REF!
Lithium response in Bipolar I patients	47	polygenicity	#REF!
Sleep duration	47	polygenicity	#REF!
Drinks per week	44	polygenicity	#REF!
Depressive affect	38	polygenicity	#REF!
Mood swings	38	polygenicity	#REF!
Anxious	37	polygenicity	#REF!
Bipolar disorder	36	polygenicity	#REF!
Irritability	36	polygenicity	#REF!
Fed-up	34	polygenicity	#REF!
Past tobacco smoking	31	polygenicity	#REF!
Worry	31	polygenicity	#REF!
Depression	29	polygenicity	#REF!
Nap	29	polygenicity	#REF!
Worry too long after embarrassment	28	polygenicity	#REF!
Current tobacco smoking	27	polygenicity	#REF!
Guilty feelings	27	polygenicity	#REF!
Tense	25	polygenicity	#REF!
Beer/cider intake	24	polygenicity	#REF!
Frequency of tiredness / lethargy in last 2 weeks	24	polygenicity	#REF!
Narcolepsy	24	polygenicity	#REF!
Sensitivity	24	polygenicity	#REF!
Miserableness	23	polygenicity	#REF!
Ever taken cannabis	21	polygenicity	#REF!
Nervous	21	polygenicity	#REF!
Getting up in morning	20	polygenicity	#REF!
Seen doctor (GP) for nerves, anxiety, tension or depression	20	polygenicity	#REF!
10 mg response to amphetamine	19	polygenicity	#REF!
Alcohol intake	19	polygenicity	#REF!
Attention deficit hyperactivity disorder	18	polygenicity	#REF!
Baseline positive affect factor score	18	polygenicity	#REF!
Ease of getting up in the morning	18	polygenicity	#REF!
Frequency of tenseness / restlessness in last 2 weeks	18	polygenicity	#REF!
Former vs current smokers	17	polygenicity	#REF!
Snoring	17	polygenicity	#REF!
Risk taking	15	polygenicity	#REF!
Felt very upset when reminded of stressful expresince in past month	14	polygenicity	#REF!
Seen a psychiatrist for nerves, anxiety, tension or depression	14	polygenicity	#REF!
Depressive symptoms	13	polygenicity	#REF!
Fraction of day affected during worst episode of depression	13	polygenicity	#REF!
Happiness	13	polygenicity	#REF!
Suffer from nerves	13	polygenicity	#REF!
Alcohol usually taken with meals	12	polygenicity	#REF!
Belief that own life is meaningfull	12	polygenicity	#REF!
Ever suffered mental distress preventing usual activities	12	polygenicity	#REF!
Frequency of consuming six or more units of alcohol	12	polygenicity	#REF!
Able to confide	11	polygenicity	#REF!
Autism spectrum disorder	10	polygenicity	#REF!
Fortifield wine intake	10	polygenicity	#REF!
Frequency of depressed mood in last 2 weeks	10	polygenicity	#REF!
Red wine intake	10	polygenicity	#REF!
Alcohol intake versus 10 years previously	9	polygenicity	#REF!
Exposure to tobacco smoke outside home	9	polygenicity	#REF!
Light smokers	9	polygenicity	#REF!
Repeated disturbing thoughts of stressful experience in past month	9	polygenicity	#REF!
Ever vs never drinkers	8	polygenicity	#REF!
Frequency of unenthusiasm / disinterest in last 2 weeks	8	polygenicity	#REF!
Ever sought or received professional help for mental distress	7	polygenicity	#REF!
Ever stopped smoking for 6+ months	7	polygenicity	#REF!
Ever unenthusiastic/disinterested for a whole week	7	polygenicity	#REF!
Excessive daytime sleepness	7	polygenicity	#REF!
Tiredness	7	polygenicity	#REF!
Champagne/white wine intake	6	polygenicity	#REF!
Ever depressed for a whole week	6	polygenicity	#REF!
Ever had period extreme irritability	6	polygenicity	#REF!
Ever had prolonged feelings of sadness or depression	6	polygenicity	#REF!
Loneliness	6	polygenicity	#REF!
Recent lack of interenst of pleasure in doing things	6	polygenicity	#REF!
Waking too early	6	polygenicity	#REF!
Age of smoking initiation	5	polygenicity	#REF!
Avoided activities or situations because of previous stressful experience in past month	5	polygenicity	#REF!
Bipolar/Major depression	5	polygenicity	#REF!
Ever had prolonged loss of interest in normal activities	5	polygenicity	#REF!
Extraversion	5	polygenicity	#REF!
Felt loved as child	5	polygenicity	#REF!
Major depressive disorder	5	polygenicity	#REF!
Number of depression episodes	5	polygenicity	#REF!
Professional informed about depression	5	polygenicity	#REF!
Recent feelings of tiredness or low enery	5	polygenicity	#REF!
Sleeping too much	5	polygenicity	#REF!
Tobacco smoking	5	polygenicity	#REF!
Anorexia nervosa	4	polygenicity	#REF!
Antisocial behavior	4	polygenicity	#REF!
Diagnosed with life-threatening illness	4	polygenicity	#REF!
Ever felt worried, tense, or anxious for most of a month or longer	4	polygenicity	#REF!
Frequency of needing morning drink of alcohol after heavy drinking session in last year	4	polygenicity	#REF!
Obsessive compulsive disorder	4	polygenicity	#REF!
PGC cross disorder	4	polygenicity	#REF!
Reason for reducing amount of alcohol drunk: Other reason	4	polygenicity	#REF!
Remission following treatment	4	polygenicity	#REF!
Response following treatment	4	polygenicity	#REF!
Sleepiness	4	polygenicity	#REF!
Weight change during worst episode of depression	4	polygenicity	#REF!
Anxiety disorder	3	polygenicity	#REF!
Exposure to tobacco smoke at home	3	polygenicity	#REF!
Feelings of worthlessness during worst period of depression	3	polygenicity	#REF!
Felt distant from other people in past month	3	polygenicity	#REF!
Former vs current drinkers	3	polygenicity	#REF!
Frequency of failure to fulfil normal expectations fue to drinking alcohol in last year	3	polygenicity	#REF!
Happiness with own health	3	polygenicity	#REF!
Internalizing	3	polygenicity	#REF!
Lifetime number of depressed periods	3	polygenicity	#REF!
Major depressive disorder, single episode	3	polygenicity	#REF!
Nicotine dependence	3	polygenicity	#REF!
Number of unsuccessful stop-smoking attempts	3	polygenicity	#REF!
Recent trouble relaxing	3	polygenicity	#REF!
Someone to take to doctor when needed as a child	3	polygenicity	#REF!
Subjective well being	3	polygenicity	#REF!
Why stopped smoking: Financial reasons	3	polygenicity	#REF!
Agression	2	polygenicity	#REF!
Been in aconfiding relationship as an adult	2	polygenicity	#REF!
Depression possibly related to stressful or traumatic event	2	polygenicity	#REF!
Did your sleep change?	2	polygenicity	#REF!
Ever highly irritable/argumentative for 2 days	2	polygenicity	#REF!
Feelings of tiredness during worst episode of depression	2	polygenicity	#REF!
Felt irritable or had angry outbursts in past month	2	polygenicity	#REF!
Frequency of depressed days during worst episode of depression	2	polygenicity	#REF!
Frequency of feeling guilt or remorse after drinking alcohol in last year	2	polygenicity	#REF!
Frequency of memory loss due to drinking alcohol in last year	2	polygenicity	#REF!
Impact of normal roles during worst period of depression	2	polygenicity	#REF!
Openness to experience	2	polygenicity	#REF!
Posttraumatic stress disorder	2	polygenicity	#REF!
Probable major depressive disorder	2	polygenicity	#REF!
Reason for reducing amount of alcohol drunk: Health precaution	2	polygenicity	#REF!
Reccent feelings or nervousness or anxiety	2	polygenicity	#REF!
Recent poor appetite or overeting	2	polygenicity	#REF!
Recent restlessness	2	polygenicity	#REF!
Spirits intake	2	polygenicity	#REF!
Trouble falling asleep	2	polygenicity	#REF!
Trouble falling or staying asleep. or sleeping too much	2	polygenicity	#REF!
Victim of physically violent crime	2	polygenicity	#REF!
Why stopped smoking: Health precaution	2	polygenicity	#REF!
Age stopped smoking	1	polygenicity	#REF!
Agreablenes	1	polygenicity	#REF!
Bedtime	1	polygenicity	#REF!
Been in serious accident believed to be life-threatening	1	polygenicity	#REF!
Cerebrospinal fluid levels of amyloid-beta 1-42	1	polygenicity	#REF!
Likelihood of resuming smoking	1	polygenicity	#REF!
Longest period of depression	1	polygenicity	#REF!
Percentage improvement after 12 weeks of antidepressant treatment in MDD	1	polygenicity	#REF!
Phosphorylated Tau at position 181	1	polygenicity	#REF!
Reason for reducing amount of alcohol drunk: Illness or ill health	1	polygenicity	#REF!
Recent feelings of depression	1	polygenicity	#REF!
Recent feelings of inadequacy	1	polygenicity	#REF!
Recent inability to stop or control worying	1	polygenicity	#REF!
Recent thoughts of suicide or self-harm	1	polygenicity	#REF!
Recent trouble concentrating on things	1	polygenicity	#REF!
Recent worrying too much about different things	1	polygenicity	#REF!
Remission after 12 weeks of antidepressant treatment in MDD	1	polygenicity	#REF!
Smoking/smokers in household	1	polygenicity	#REF!
Why stopped smoking: Illness or ill health	1	polygenicity	#REF!
Witnessed sudden violent death	1	polygenicity	#REF!

## Sheet: Mammalian Phenotype Ontology 
Mammalian Phenotype Ontology Enrichment
nervous system phenotype	0.000753724	MGI:101924,MGI:103078,MGI:103285,MGI:104554,MGI:104565,MGI:104684,MGI:104719,MGI:106011,MGI:106217,MGI:106651,MGI:106925,MGI:107562,MGI:107585,MGI:107717,MGI:107745,MGI:107935,MGI:108005,MGI:108029,MGI:108408,MGI:108511,MGI:109246,MGI:109483,MGI:109585,MGI:109632,MGI:1097152,MGI:1098266,MGI:1098567,MGI:1098783,MGI:1098827,MGI:1099446,MGI:1100508,MGI:1101759,MGI:1195256,MGI:1196356,MGI:1201683,MGI…	MP:0003631	178
preweaning lethality	0.00351775	MGI:101924,MGI:101938,MGI:102934,MGI:103071,MGI:103078,MGI:103198,MGI:103202,MGI:104554,MGI:104719,MGI:104756,MGI:104790,MGI:104889,MGI:105381,MGI:106203,MGI:106651,MGI:107484,MGI:107585,MGI:107717,MGI:107745,MGI:108104,MGI:108177,MGI:109186,MGI:109246,MGI:109272,MGI:109336,MGI:109516,MGI:1095438,MGI:109632,MGI:1096397,MGI:1101759,MGI:1201683,MGI:1202392,MGI:1202876,MGI:1203524,MGI:1276116,MGI:12…	MP:0010770	189
abnormal embryo development	0.00550832	MGI:103071,MGI:103198,MGI:104790,MGI:104889,MGI:106203,MGI:106651,MGI:107717,MGI:107745,MGI:108177,MGI:109336,MGI:1096397,MGI:1101759,MGI:1201683,MGI:1202392,MGI:1202876,MGI:1276116,MGI:1298218,MGI:1315197,MGI:1329037,MGI:1338850,MGI:1341217,MGI:1347465,MGI:1350935,MGI:1352466,MGI:1861676,MGI:1891829,MGI:1914229,MGI:1914811,MGI:1914832,MGI:1915147,MGI:1915278,MGI:1916320,MGI:1917087,MGI:1918177,M…	MP:0001672	62
no abnormal phenotype detected	0.00609649	MGI:102810,MGI:102934,MGI:103198,MGI:104532,MGI:104554,MGI:104684,MGI:104756,MGI:106011,MGI:106217,MGI:107717,MGI:107935,MGI:107941,MGI:108186,MGI:109187,MGI:109336,MGI:109443,MGI:1095404,MGI:109585,MGI:109632,MGI:1097152,MGI:1201402,MGI:1201683,MGI:1202876,MGI:1203522,MGI:1206591,MGI:1276116,MGI:1277961,MGI:1298218,MGI:1315197,MGI:1333815,MGI:1339758,MGI:1339760,MGI:1346338,MGI:1347465,MGI:13493…	MP:0002169	102
normal phenotype	0.00647466	MGI:102810,MGI:102934,MGI:103198,MGI:104532,MGI:104554,MGI:104684,MGI:104756,MGI:106011,MGI:106217,MGI:107717,MGI:107935,MGI:107941,MGI:108186,MGI:109187,MGI:109336,MGI:109443,MGI:1095404,MGI:109585,MGI:109632,MGI:1097152,MGI:1201402,MGI:1201683,MGI:1202876,MGI:1203522,MGI:1206591,MGI:1276116,MGI:1277961,MGI:1298218,MGI:1315197,MGI:1333815,MGI:1339758,MGI:1339760,MGI:1346338,MGI:1347465,MGI:13493…	MP:0002873	102
embryonic growth retardation	0.0110395	MGI:103198,MGI:104790,MGI:104889,MGI:106651,MGI:107717,MGI:109336,MGI:1202392,MGI:1276116,MGI:1315197,MGI:1338850,MGI:1347465,MGI:1352466,MGI:1861676,MGI:1914811,MGI:1914832,MGI:1915147,MGI:1916320,MGI:1917087,MGI:1918177,MGI:1919277,MGI:1919420,MGI:1919999,MGI:1920081,MGI:1926143,MGI:1928140,MGI:1929059,MGI:1933157,MGI:2144837,MGI:2145950,MGI:2443584,MGI:2446632,MGI:88067,MGI:88096,MGI:88276,MGI…	MP:0003984	41
prenatal growth retardation	0.0136164	MGI:103198,MGI:104554,MGI:104790,MGI:104889,MGI:105381,MGI:106651,MGI:107717,MGI:109336,MGI:1202392,MGI:1276116,MGI:1315197,MGI:1338850,MGI:1347465,MGI:1352466,MGI:1861676,MGI:1891221,MGI:1914229,MGI:1914811,MGI:1914832,MGI:1915147,MGI:1916320,MGI:1917087,MGI:1918177,MGI:1919277,MGI:1919420,MGI:1919999,MGI:1920081,MGI:1926143,MGI:1928140,MGI:1929059,MGI:1933157,MGI:2144837,MGI:2145950,MGI:2443584…	MP:0010865	45

## Sheet: pathwax_stats_KEGG
No	Pathway	PathwaySize	CrossTalk	type	pValue	FWER	Class
1	Parkinson's disease	126	3146	enrichment	3.17e-11	9.68e-09	Human Diseases
2	Oxidative phosphorylation	117	2999	enrichment	2.11e-10	6.42e-08	Metabolism
3	Ribosome	131	6677	enrichment	3.34e-09	1.02e-06	Genetic Information Processing
4	Huntington's disease	179	4210	enrichment	3.53e-09	1.08e-06	Human Diseases
5	RNA transport	161	4157	enrichment	1.03e-08	3.15e-06	Genetic Information Processing
6	Ribosome biogenesis in eukaryotes	78	2419	enrichment	1.53e-08	4.65e-06	Genetic Information Processing
7	Non-alcoholic fatty liver disease (NAFLD)	143	1979	enrichment	3.11e-08	9.5e-06	Human Diseases
8	Protein processing in endoplasmic reticulum	163	3754	enrichment	3.47e-08	1.06e-05	Genetic Information Processing
9	Alzheimer's disease	162	3109	enrichment	3.87e-08	1.18e-05	Human Diseases
10	Epstein-Barr virus infection	197	4243	enrichment	4.8e-08	1.46e-05	Human Diseases
11	Proteasome	46	2702	enrichment	3.68e-07	0.000112	Genetic Information Processing
12	HTLV-I infection	257	2192	enrichment	9.03e-07	0.000275	Human Diseases
13	Pathways in cancer	385	3111	enrichment	9.48e-07	0.000289	Human Diseases
14	Human papillomavirus infection	317	2314	enrichment	1.27e-06	0.000387	Human Diseases
15	Necroptosis	160	2722	enrichment	2.6e-06	0.000794	Cellular Processes
16	Hippo signaling pathway	150	1598	enrichment	3.45e-06	0.00105	Environmental Information Processing
17	Toxoplasmosis	106	1176	enrichment	4.16e-06	0.00127	Human Diseases
18	Alcoholism	170	2953	enrichment	4.77e-06	0.00146	Human Diseases
19	Aminoacyl-tRNA biosynthesis	44	1353	enrichment	9.01e-06	0.00275	Genetic Information Processing
20	PI3K-Akt signaling pathway	329	2444	enrichment	1.18e-05	0.00359	Environmental Information Processing
21	Fluid shear stress and atherosclerosis	139	2084	enrichment	1.29e-05	0.00392	Human Diseases
22	Retrograde endocannabinoid signaling	138	1661	enrichment	1.34e-05	0.0041	Organismal Systems
23	Measles	133	1287	enrichment	2.68e-05	0.00819	Human Diseases
24	Influenza A	162	1883	enrichment	3.05e-05	0.0093	Human Diseases
25	Arrhythmogenic right ventricular cardiomyopathy (ARVC)	71	596	enrichment	3.46e-05	0.0105	Human Diseases
26	Spliceosome	128	4189	enrichment	3.46e-05	0.0105	Genetic Information Processing
27	Signaling pathways regulating pluripotency of stem cells	135	731	enrichment	5.68e-05	0.0173	Cellular Processes
28	Rap1 signaling pathway	205	1950	enrichment	5.68e-05	0.0173	Environmental Information Processing
29	Phagosome	154	2696	enrichment	7.25e-05	0.0221	Cellular Processes
30	Estrogen signaling pathway	95	1803	enrichment	0.000104	0.0316	Organismal Systems
31	RNA degradation	76	1817	enrichment	0.000108	0.0329	Genetic Information Processing
32	Focal adhesion	193	2309	enrichment	0.000112	0.0342	Cellular Processes
33	Leukocyte transendothelial migration	105	1499	enrichment	0.000142	0.0433	Organismal Systems

## Sheet: pathwax_stats_reactome
Pathway	PathwaySize	CrossTalk	type	pValue	FWER
Mitochondrial translation termination	85	1418	enrichment	7e-22	2.5e-19
Mitochondrial translation elongation	83	1430	enrichment	1.65e-21	5.89e-19
Ub-specific processing proteases	171	4233	enrichment	5.2e-11	1.86e-08
UCH proteinases	96	4060	enrichment	3.02e-10	1.08e-07
Downstream TCR signaling	89	3281	enrichment	4.32e-10	1.54e-07
FCERI mediated NF-kB activation	80	3251	enrichment	8.28e-10	2.96e-07
SUMOylation of DNA damage response and repair proteins	69	1149	enrichment	9.88e-10	3.53e-07
Degradation of beta-catenin by the destruction complex	79	3569	enrichment	1.4e-09	5.01e-07
Major pathway of rRNA processing in the nucleolus and cytosol	122	5592	enrichment	5.57e-09	1.99e-06
Activation of NF-kappaB in B cells	68	3220	enrichment	5.89e-09	2.1e-06
Dectin-1 mediated noncanonical NF-kB signaling	61	3175	enrichment	9.24e-09	3.3e-06
NIK-->noncanonical NF-kB signaling	61	3175	enrichment	9.24e-09	3.3e-06
ABC-family proteins mediated transport	97	3482	enrichment	1.03e-08	3.69e-06
GLI3 is processed to GLI3R by the proteasome	61	3210	enrichment	1.16e-08	4.13e-06
Hedgehog ligand biogenesis	64	3221	enrichment	1.44e-08	5.15e-06
Degradation of GLI1 by the proteasome	59	3124	enrichment	2.01e-08	7.18e-06
Regulation of RUNX2 expression and activity	54	3105	enrichment	2.24e-08	8.01e-06
Regulation of PTEN stability and activity	68	3277	enrichment	2.37e-08	8.46e-06
SCF-beta-TrCP mediated degradation of Emi1	57	3112	enrichment	2.64e-08	9.44e-06
Degradation of AXIN	57	2994	enrichment	2.79e-08	9.97e-06
SCF(Skp2)-mediated degradation of p27/p21	62	3133	enrichment	2.95e-08	1.05e-05
AUF1 (hnRNP D0) binds and destabilizes mRNA	56	3337	enrichment	3.66e-08	1.31e-05
Ubiquitin-dependent degradation of Cyclin D1	53	3025	enrichment	3.66e-08	1.31e-05
The role of GTSE1 in G2/M progression after G2 checkpoint	62	3415	enrichment	4.55e-08	1.62e-05
Regulation of RUNX3 expression and activity	56	2982	enrichment	4.55e-08	1.62e-05
FBXL7 down-regulates AURKA during mitotic entry and in early mitosis	57	3130	enrichment	5.34e-08	1.91e-05
Asymmetric localization of PCP proteins	58	2989	enrichment	5.34e-08	1.91e-05
CDK-mediated phosphorylation and removal of Cdc6	53	3009	enrichment	5.34e-08	1.91e-05
Oxygen-dependent proline hydroxylation of Hypoxia-inducible Factor Alpha	67	3116	enrichment	5.95e-08	2.12e-05
Laminin interactions	28	86	enrichment	6.4e-08	2.28e-05
Neutrophil degranulation	495	8845	enrichment	6.62e-08	2.36e-05
Antigen processing: Ubiquitination & Proteasome degradation	137	3515	enrichment	9.59e-08	3.42e-05
Degradation of DVL	59	3041	enrichment	9.59e-08	3.42e-05
Autodegradation of the E3 ubiquitin ligase COP1	54	2995	enrichment	1.07e-07	3.8e-05
Ubiquitin Mediated Degradation of Phosphorylated Cdc25A	54	2986	enrichment	1.18e-07	4.23e-05
MAPK6/MAPK4 signaling	78	3419	enrichment	1.31e-07	4.69e-05
Separation of Sister Chromatids	174	4706	enrichment	1.31e-07	4.69e-05
Cross-presentation of soluble exogenous antigens (endosomes)	47	2693	enrichment	1.62e-07	5.78e-05
Cdc20:Phospho-APC/C mediated degradation of Cyclin A	74	3208	enrichment	1.71e-07	6.09e-05
Regulation of RAS by GAPs	68	3056	enrichment	1.71e-07	6.09e-05
APC/C:Cdc20 mediated degradation of Securin	69	3041	enrichment	1.99e-07	7.11e-05
Hedgehog 'on' state	106	3812	enrichment	2.1e-07	7.49e-05
Regulation of ornithine decarboxylase (ODC)	52	2694	enrichment	2.21e-07	7.88e-05
Autodegradation of Cdh1 by Cdh1:APC/C	65	2975	enrichment	2.32e-07	8.3e-05
CDT1 association with the CDC6:ORC:origin complex	61	3034	enrichment	5.5e-07	0.000196
Complex I biogenesis	50	941	enrichment	5.78e-07	0.000206
Orc1 removal from chromatin	73	3452	enrichment	7.05e-07	0.000252
APC/C:Cdh1 mediated degradation of Cdc20 and other APC/C:Cdh1 targeted proteins in late mitosis/early G1	74	3117	enrichment	7.79e-07	0.000278
RUNX1 regulates transcription of genes involved in differentiation of HSCs	90	3744	enrichment	9.96e-07	0.000355
SUMOylation of chromatin organization proteins	62	1462	enrichment	1.1e-06	0.000392
Transcriptional Regulation by E2F6	25	415	enrichment	1.1e-06	0.000392
mRNA Splicing - Major Pathway	178	5537	enrichment	2.6e-06	0.00093
MET activates PTK2 signaling	29	112	enrichment	3.27e-06	0.00117
L13a-mediated translational silencing of Ceruloplasmin expression	103	6387	enrichment	3.45e-06	0.00123
GTP hydrolysis and joining of the 60S ribosomal subunit	104	6349	enrichment	4.77e-06	0.0017
Transport of Mature mRNA derived from an Intron-Containing Transcript	72	1541	enrichment	5.48e-06	0.00196
Nonsense Mediated Decay (NMD) enhanced by the Exon Junction Complex (EJC)	106	5840	enrichment	6.88e-06	0.00246
Formation of a pool of free 40S subunits	93	5920	enrichment	7.88e-06	0.00281
SRP-dependent cotranslational protein targeting to membrane	85	5253	enrichment	2.68e-05	0.00958
Translation initiation complex formation	56	3466	enrichment	3.18e-05	0.0113
Ribosomal scanning and start codon recognition	56	3417	enrichment	3.92e-05	0.014
Formation of the ternary complex, and subsequently, the 43S complex	49	3176	enrichment	3.92e-05	0.014
Nonsense Mediated Decay (NMD) independent of the Exon Junction Complex (EJC)	86	5362	enrichment	5.24e-05	0.0187
Regulation of Glucokinase by Glucokinase Regulatory Protein	29	532	enrichment	5.45e-05	0.0195
SUMOylation of RNA binding proteins	31	764	enrichment	8.18e-05	0.0292
snRNP Assembly	51	1114	enrichment	9.97e-05	0.0356
Oxidative Stress Induced Senescence	69	1797	enrichment	0.000108	0.0385
NoRC negatively regulates rRNA expression	70	2163	enrichment	0.000131	0.0469
