# Supplementary material for: Action detection using a neural network elucidates the genetics of mouse grooming behavior
Source: eLife journal article supplement (doi:10.7554/elife.63207), 2021-03-17
Supplement: supp [file elife-63207-supp-v1.zip › elife_poa_e63207_Supplementary_file_2.csv]

Strain	Sex	Box	TestDate	Weight	Split	AnimalNumber	ClipStartFrame	ClipDuration	TrainDatasetClipID	PaperID
LP/J	M	LL4-3	2016/01/26	23.4	Training	96	43571	2469	2001	Training_1
A/J	M	LL1-1	2016/03/28	22.6	Validation	13	55122	2298	2002	Validation_1
CB6F1/J	M	LL4-4	2016/03/29	29.9	Training	102	76900	2636	2003	Training_2
B6129SF1/J	F	LL5-2	2016/05/19	20.3	Training	133	14377	996	2004	Training_3
KK/HiJ	F	LL4-2	2017/01/04	32.5	Training	114	85043	1548	2005	Training_4
C57BL/10SnJ	M	LL6-3	2016/04/06	31.9	Validation	149	72809	3421	2006	Validation_2
MOLF/EiJ	F	LL2-2	2017/01/12	14.1	Training	59	72040	10788	2007	Training_5
129P3/J	F	LL3-4	2016/04/12	20.6	Validation	74	6692	614	2008	Validation_3
CBA/J	F	LL3-1	2016/05/10	19.4	Training	81	63319	912	2009	Training_6
C57L/J	M	LL4-4	2016/05/09	27.5	Training	110	66425	1491	2010	Training_7
KK/HiJ	M	LL6-2	2016/12/27	31.1	Training	155	26692	5664	2011	Training_8
B6129SF1/J	M	LL4-3	2016/06/06	35.6	Training	111	43049	1497	2012	Training_9
DBA/1J	M	LL3-2	2016/04/20	22.7	Training	77	113839	2841	2013	Training_10
NON/ShiLtJ	F	LL2-4	2016/04/04	28.7	Training	41	60566	869	2014	Training_11
C3HeB/FeJ	F	LL3-2	2016/01/12	24.1	Training	63	107386	619	2015	Training_12
MOLF/EiJ	F	LL2-2	2017/01/12	14.1	Training	59	20464	7024	2016	Training_13
A/J	F	LL1-2	2016/04/06	20.4	Training	15	73541	2821	2017	Training_14
B6129PF1/J	F	LL1-2	2016/05/05	19	Training	22	113572	1206	2018	Training_15
MOLF/EiJ	F	LL5-3	2017/01/04	14.8	Training	140	40327	1587	2019	Training_16
TALLYHO/JngJ	F	LL4-2	2016/05/04	40.3	Training	109	113836	2372	2020	Training_17
WB/ReJ Kit<W>/J	F	LL5-4	2016/01/26	22	Training	117	81203	795	2021	Training_18
WBB6F1/J-Kit<W>/Kit<W-v>/J	F	LL4-2	2016/03/30	20.9	Training	103	60944	1111	2022	Training_19
129P3/J	F	LL3-3	2016/04/12	18.6	Training	73	85351	787	2023	Training_20
129S1/SvlmJ	M	LL2-4	2016/05/11	23.6	Training	52	94074	1821	2024	Training_21
LP/J	M	LL4-3	2016/01/26	23.4	Training	96	12652	1974	2025	Training_22
A/J	F	LL1-2	2016/04/06	20.4	Validation	15	29501	1800	2026	Validation_4
NZB/BlNJ	M	LL3-3	2016/02/01	23.5	Training	65	17700	1674	2027	Training_23
DBA/2J	M	LL3-1	2015/12/21	27.2	Training	60	62285	2043	2028	Training_24
129P3/J	M	LL1-3	2016/04/18	20.1	Training	18	84524	1641	2029	Training_25
C3HeB/FeJ	M	LL1-1	2016/01/12	24.5	Training	2	70219	989	2030	Training_26
DBA/1J	M	LL6-4	2016/04/04	25.2	Training	147	93580	785	2031	Training_27
AKR/J	M	LL3-2	2016/04/05	35.3	Training	70	16085	1467	2032	Training_28
C57BL/6J-A<w-J>/J	M	LL6-3	2016/06/09	23.2	Training	154	109341	663	2033	Training_29
B6SJLF1/J	F	LL4-3	2016/03/14	18.6	Training	101	56767	748	2034	Training_30
BALB/cJ	M	LL3-2	2016/04/11	27.6	Training	72	82210	1138	2035	Training_31
CZECHII/EiJ	F	LL1-1	2017/01/12	12.2	Training	28	39073	2790	2036	Training_32
LP/J	F	LL2-1	2016/01/26	16.6	Training	35	85903	1857	2037	Training_33
BALB/cByJ	M	LL5-3	2016/02/16	28	Training	122	45568	2365	2038	Training_34
129S1/SvlmJ	M	LL2-3	2016/05/11	22.6	Training	51	24285	1370	2039	Training_35
B6SJLF1/J	F	LL4-3	2016/03/14	18.6	Training	101	21049	635	2040	Training_36
MA/MyJ	M	LL1-2	2017/01/24	21.4	Training	29	97806	1410	2041	Training_37
129S1/SvlmJ	M	LL2-4	2016/05/11	23.6	Training	52	92042	1836	2042	Training_38
C57L/J	M	LL1-3	2016/01/18	25.2	Training	4	86175	2398	2043	Training_39
129X1/SvJ	M	LL2-4	2016/04/20	23.3	Validation	44	108278	1687	2044	Validation_5
KK.Cg-A<y>/J	F	LL3-4	2016/08/19	26.9	Training	86	63499	3963	2045	Training_40
DBA/1J	M	LL3-2	2016/04/20	22.7	Training	77	104166	1853	2046	Training_41
FVB/NJ	F	LL5-4	2016/04/13	22	Training	126	120883	1447	2047	Training_42
C57BL/6NJ	F	LL3-1	2016/06/10	21.8	Training	83	19190	1627	2048	Training_43
DBA/2J	F	LL5-1	2016/07/01	29.8	Training	139	36609	1147	2049	Training_44
BALB/cJ	M	LL3-2	2016/04/11	27.6	Training	72	120496	585	2050	Training_45
C3HeB/FeJ	F	LL3-2	2016/01/12	24.1	Training	63	37216	2026	2117	Training_46
DBA/1J	M	LL2-3	2015/12/07	20	Validation	31	31038	2114	2118	Validation_6
PL/J	F	LL5-2	2016/02/15	18.1	Training	120	85222	4403	2119	Training_47
C3H/HeOuJ	M	LL1-2	2016/03/22	27.8	Validation	11	35372	653	2120	Validation_7
DBA/1J	M	LL6-4	2016/04/04	25.2	Training	147	76703	910	2121	Training_48
TALLYHO/JngJ	F	LL3-3	2016/05/04	35.8	Validation	80	51471	6627	2122	Validation_8
B6CBAF1/J	M	LL2-4	2016/04/29	30.5	Training	45	46092	1061	2123	Training_49
DBA/2J	F	LL5-1	2016/07/01	29.8	Training	139	65308	2164	2124	Training_50
TALLYHO/JngJ	F	LL3-3	2016/05/04	35.8	Training	80	86818	3155	2125	Training_51
B6129SF1/J	M	LL4-3	2016/06/06	35.6	Training	111	32492	3399	2126	Training_52
B6129SF1/J	F	LL5-2	2016/05/19	20.3	Training	133	35112	1958	2127	Training_53
NOR/LtJ	F	LL2-1	2016/02/16	20.4	Training	36	62703	719	2128	Training_54
129S1/SvlmJ	M	LL2-4	2016/05/11	23.6	Training	52	17218	1163	2129	Training_55
DBA/2J	F	LL5-3	2015/12/14	20.3	Training	116	76427	1373	2130	Training_56
TALLYHO/JngJ	F	LL4-2	2016/05/04	40.3	Training	109	41757	1202	2131	Training_57
NZB/BlNJ	M	LL3-3	2016/02/01	23.5	Training	65	10922	834	2132	Training_58
C57BL/6J-A<w-J>/J	F	LL5-4	2016/06/20	21.3	Training	138	41023	1197	2133	Training_59
129P3/J	F	LL3-3	2016/04/12	18.6	Training	73	79973	1605	2134	Training_60
C57BL/6J	F	LL2-4	2016/09/13	25.5	Training	56	58186	884	2135	Training_61
SEA/GnJ	F	LL6-2	2017/01/04	23.6	Training	156	75331	2790	2136	Training_62
A/J	F	LL1-2	2016/04/06	20.4	Validation	15	25253	1081	2137	Validation_9
CBA/CaJ	M	LL3-1	2016/06/09	27.8	Training	82	66616	2045	2138	Training_63
CByB6F1/J	M	LL6-2	2016/04/06	26.1	Training	148	81107	618	2139	Training_64
BALB/cJ	M	LL4-1	2016/04/11	31.2	Training	104	56070	1507	2140	Training_65
C3H/HeJ	F	LL6-1	2016/02/08	19.9	Training	142	27124	656	2141	Training_66
MOLF/EiJ	F	LL5-3	2017/01/04	14.8	Training	140	38468	847	2142	Training_67
MA/MyJ	M	LL1-4	2017/01/24	33.5	Training	30	92175	5002	2143	Training_68
CBA/CaJ	M	LL3-1	2016/06/09	27.8	Training	82	40935	748	2144	Training_69
CAST/EiJ	F	LL2-4	2016/01/19	14.3	Training	34	96964	1735	2145	Training_70
AKR/J	F	LL3-4	2016/04/04	29.9	Training	69	68341	811	2146	Training_71
C3H/HeJ	M	LL4-2	2016/02/08	25.9	Training	97	48918	1278	2147	Training_72
C57L/J	M	LL1-3	2016/01/18	25.2	Training	4	89184	709	2148	Training_73
TALLYHO/JngJ	F	LL3-3	2016/05/04	35.8	Training	80	28708	1109	2149	Training_74
C57BL/6J-Kit<W-v>/J	M	LL2-4	2016/02/29	25.7	Training	38	100409	4358	2150	Training_75
DBA/2J	F	LL5-1	2016/07/01	29.8	Training	139	96264	2121	2151	Training_76
A/J	F	LL1-1	2016/04/06	19.5	Training	14	54214	1092	2152	Training_77
CBA/J	F	LL3-1	2016/05/10	19.4	Training	81	48721	2416	2153	Training_78
B6129SF1/J	F	LL5-2	2016/05/19	20.3	Training	133	48414	5919	2154	Training_79
TALLYHO/JngJ	F	LL1-3	2016/04/29	36.5	Training	20	121067	1012	2155	Training_80
B6AF1/J	M	LL2-1	2016/03/07	28.2	Training	40	106554	1776	2156	Training_81
B6129SF1/J	F	LL5-2	2016/05/19	20.3	Training	133	101252	13060	2157	Training_82
RIIIS/J	F	LL5-1	2017/01/24	16.7	Training	141	45692	877	2158	Training_83
B6129PF1/J	M	LL5-3	2016/04/28	30.6	Training	131	26817	982	2159	Training_84
B6SJLF1/J	F	LL4-3	2016/03/14	18.6	Training	101	111004	776	2160	Training_85
TALLYHO/JngJ	F	LL3-3	2016/05/04	35.8	Validation	80	10486	1448	2161	Validation_10
C3HeB/FeJ	M	LL1-1	2016/01/12	24.5	Training	2	59240	598	2162	Training_86
LP/J	M	LL6-1	2016/04/20	19.7	Training	152	105557	2025	2163	Training_87
BALB/cByJ	M	LL5-1	2016/02/16	29.2	Training	121	47830	789	2164	Training_88
C57BL/10SnJ	M	LL6-3	2016/04/06	31.9	Training	149	92079	753	2165	Training_89
SEA/GnJ	M	LL3-3	2017/01/24	23.7	Validation	93	52959	621	2166	Validation_11
BALB/cJ	M	LL4-4	2016/04/11	28.6	Training	105	51844	1344	2167	Training_90
B6AF1/J	M	LL2-1	2016/03/07	28.2	Training	40	95209	1765	2168	Training_91
DBA/2J	F	LL5-1	2016/07/01	29.8	Training	139	6521	1325	2169	Training_92
129P3/J	F	LL3-4	2016/04/12	20.6	Training	74	85879	884	2170	Training_93
129S1/SvlmJ	M	LL2-2	2016/05/11	23.3	Training	50	23483	1180	2171	Training_94
DBA/1J	M	LL2-3	2015/12/07	20	Training	31	69819	1769	2172	Training_95
PL/J	M	LL4-3	2016/02/15	27.1	Training	98	74293	1178	2173	Training_96
CBA/CaJ	F	LL5-1	2016/02/09	22.1	Training	119	98626	5569	2174	Training_97
DBA/2J	F	LL5-3	2015/12/14	20.3	Training	116	54954	784	2175	Training_98
AKR/J	M	LL3-2	2016/04/05	35.3	Training	70	41760	2579	2176	Training_99
KK.Cg-A<y>/J	F	LL3-2	2016/08/19	34.9	Training	84	120586	689	2177	Training_100
LP/J	F	LL2-1	2016/01/26	16.6	Validation	35	83454	1944	2178	Validation_12
WBB6F1/J-Kit<W>/Kit<W-v>/J	M	LL1-2	2016/03/23	25.3	Validation	12	78170	8507	2179	Validation_13
CBA/CaJ	M	LL3-1	2016/06/09	27.8	Training	82	71572	1989	2180	Training_101
DBA/2J	F	LL5-1	2016/07/01	29.8	Training	139	47378	1818	2181	Training_102
129X1/SvJ	M	LL2-4	2016/04/20	23.3	Training	44	48039	692	2182	Training_103
CAST/EiJ	M	LL4-3	2016/01/19	16.2	Training	95	21851	1185	2183	Training_104
MOLF/EiJ	F	LL5-3	2017/01/04	14.8	Training	140	51797	7288	2184	Training_105
NON/ShiLtJ	F	LL2-4	2016/04/04	28.7	Training	41	92046	1383	2185	Training_106
CB6F1/J	M	LL1-4	2016/03/15	28.7	Training	9	36052	991	2186	Training_107
WBB6F1/J-Kit<W>/Kit<W-v>/J	F	LL4-2	2016/03/30	20.9	Training	103	92859	1712	2187	Training_108
CAF1/J	F	LL1-2	2016/05/02	25.7	Training	21	20576	2459	2188	Training_109
CB6F1/J	M	LL3-4	2016/03/29	30.4	Training	67	110014	1315	2189	Training_110
DBA/2J	M	LL3-1	2015/12/21	27.2	Training	60	59811	1539	2190	Training_111
NOR/LtJ	F	LL2-1	2016/02/16	20.4	Training	36	40893	2066	2191	Training_112
CBA/CaJ	F	LL6-2	2016/02/09	21.5	Training	143	96606	655	2192	Training_113
SM/J	M	LL3-1	2016/12/27	23.4	Training	87	28338	755	2193	Training_114
BUB/BnJ	M	LL2-4	2016/12/27	30.2	Validation	58	77031	1804	2194	Validation_14
CBA/CaJ	M	LL3-1	2016/06/09	27.8	Validation	82	33873	1978	2195	Validation_15
SEA/GnJ	M	LL6-1	2017/01/12	25.5	Validation	157	54263	1112	2196	Validation_16
BALB/cJ	M	LL3-2	2016/04/11	27.6	Training	72	74668	1410	2197	Training_115
CB6F1/J	M	LL4-4	2016/03/29	29.9	Training	102	110966	1343	2198	Training_116
WBB6F1/J-Kit<W>/Kit<W-v>/J	F	LL4-2	2016/03/30	20.9	Training	103	113314	1451	2199	Training_117
SWR/J	F	LL3-2	2016/05/03	16.8	Training	79	109468	3445	2200	Training_118
B6AF1/J	F	LL4-3	2016/03/07	19	Training	99	84883	1024	2201	Training_119
PWD/PhJ	F	LL1-3	2017/01/04	15.2	Validation	27	21451	2392	2202	Validation_17
CAF1/J	F	LL2-4	2016/05/02	22.6	Training	46	63701	1978	2203	Training_120
B6CBAF1/J	F	LL4-3	2016/05/03	20.9	Training	108	39791	1324	2204	Training_121
DBA/1J	M	LL2-3	2015/12/07	20	Training	31	41938	3578	2205	Training_122
KK/HiJ	F	LL4-2	2017/01/04	32.5	Training	114	100542	1248	2206	Training_123
C57BL/10SnJ	M	LL6-4	2016/04/06	29.7	Training	150	74244	1354	2207	Training_124
MOLF/EiJ	F	LL2-2	2017/01/12	14.1	Validation	59	18011	2254	2208	Validation_18
AKR/J	F	LL3-4	2016/04/04	29.9	Training	69	21325	818	2209	Training_125
B6.SJL-Ptprc<a> Pepc<b>/BoyJ	F	LL3-4	2016/01/11	24.4	Training	62	59147	1118	2210	Training_126
C57L/J	F	LL1-2	2016/02/02	18.2	Validation	5	93394	1506	2211	Validation_19
MA/MyJ	M	LL4-2	2017/01/12	23.6	Training	115	34449	1647	2212	Training_127
C3H/HeOuJ	F	LL3-3	2016/03/28	21	Training	66	25175	961	2213	Training_128
B6C3F1/J	F	LL6-1	2016/04/07	20.9	Training	151	131059	1751	2214	Training_129
129P3/J	F	LL3-3	2016/04/12	18.6	Validation	73	106413	648	2215	Validation_20
B6D2F1/J	F	LL5-4	2016/04/14	21.8	Training	128	52274	898	2216	Training_130
CAST/EiJ	F	LL2-4	2016/01/19	14.3	Training	34	81437	1682	2217	Training_131
NON/ShiLtJ	F	LL3-2	2016/04/04	28.9	Training	68	26634	757	2218	Training_132
129S1/SvlmJ	M	LL2-2	2016/05/11	23.3	Training	50	86971	712	2219	Training_133
C57BL/6J-A<w-J>/J	F	LL4-3	2016/06/20	20.7	Training	112	89171	841	2220	Training_134
WBB6F1/J-Kit<W>/Kit<W-v>/J	M	LL1-2	2016/03/23	25.3	Training	12	41432	887	2221	Training_135
CZECHII/EiJ	F	LL3-4	2017/01/04	11	Training	92	28475	1239	2222	Training_136
DBA/2J	F	LL5-1	2016/07/01	29.8	Training	139	32945	2016	2223	Training_137
NOR/LtJ	M	LL2-3	2016/04/18	27.8	Training	43	74003	8236	2224	Training_138
B6AF1/J	M	LL1-4	2016/04/14	25.5	Training	17	30307	861	2225	Training_139
LP/J	M	LL4-3	2016/01/26	23.4	Validation	96	69690	6281	2226	Validation_21
TALLYHO/JngJ	F	LL3-3	2016/05/04	35.8	Training	80	31974	2313	2227	Training_140
129S1/SvlmJ	M	LL2-2	2016/05/11	23.3	Training	50	13274	658	2228	Training_141
DBA/1J	M	LL6-4	2016/04/04	25.2	Training	147	71756	2432	2229	Training_142
129P3/J	F	LL3-4	2016/04/12	20.6	Training	74	105203	1348	2230	Training_143
C57BL/10SnJ	F	LL3-3	2016/04/06	23.9	Training	71	11086	750	2231	Training_144
DBA/2J	F	LL5-3	2015/12/14	20.3	Training	116	66805	3291	2232	Training_145
SWR/J	F	LL2-2	2016/05/03	19.1	Training	47	8850	1247	2233	Training_146
129S1/SvlmJ	M	LL2-3	2016/05/11	22.6	Training	51	30242	937	2234	Training_147
C57L/J	M	LL1-3	2016/01/18	25.2	Training	4	75483	890	2235	Training_148
TALLYHO/JngJ	F	LL4-2	2016/05/04	40.3	Training	109	116391	1715	2236	Training_149
NZB/BlNJ	F	LL2-4	2016/05/17	22.9	Training	53	57883	4842	2237	Training_150
B6SJLF1/J	F	LL4-3	2016/03/14	18.6	Validation	101	65252	945	2238	Validation_22
A/J	F	LL1-1	2016/04/06	19.5	Training	14	61275	1107	2239	Training_151
C57BL/10SnJ	M	LL6-4	2016/04/06	29.7	Training	150	149393	2065	2240	Training_152
MOLF/EiJ	F	LL2-2	2017/01/12	14.1	Training	59	33548	3686	2241	Training_153
NOD/ShiLtJ	F	LL5-2	2016/05/26	19.9	Training	136	33000	617	2242	Training_154
C3HeB/FeJ	M	LL1-2	2016/01/12	25.5	Training	3	12220	1122	2243	Training_155
SEA/GnJ	M	LL6-1	2017/01/12	25.5	Training	157	28992	1216	2244	Training_156
KK/HiJ	F	LL4-2	2017/01/04	32.5	Training	114	78665	1888	2245	Training_157
B6.SJL-Ptprc<a> Pepc<b>/BoyJ	F	LL3-2	2016/01/11	22.6	Training	61	62856	870	2246	Training_158
SEA/GnJ	F	LL6-2	2017/01/04	23.6	Training	156	93819	1394	2247	Training_159
A/J	M	LL1-1	2016/03/28	22.6	Training	13	18830	797	2248	Training_160
B6129PF1/J	F	LL1-2	2016/05/05	19	Training	22	73973	1737	2249	Training_161
B6SJLF1/J	F	LL4-3	2016/03/14	18.6	Validation	101	57728	816	2250	Validation_23
A/J	M	LL1-1	2016/03/28	22.6	Training	13	81797	803	2251	Training_162
C57BL/6J-Kit<W-v>/J	M	LL2-4	2016/02/29	25.7	Training	38	40317	1633	2252	Training_163
MOLF/EiJ	F	LL5-3	2017/01/04	14.8	Training	140	41927	5801	2253	Training_164
TALLYHO/JngJ	F	LL1-3	2016/04/29	36.5	Training	20	103136	1153	2254	Training_165
C57BLKS/J	F	LL1-2	2016/02/09	21.1	Training	6	78407	678	2255	Training_166
CByB6F1/J	M	LL6-2	2016/04/06	26.1	Training	148	54301	589	2256	Training_167
MRL/MpJ	F	LL3-2	2016/04/18	32.2	Validation	76	77650	1777	2257	Validation_24
WB/ReJ Kit<W>/J	F	LL5-4	2016/01/26	22	Training	117	99475	1843	2258	Training_168
B6129SF1/J	F	LL5-2	2016/05/19	20.3	Training	133	20984	2291	2259	Training_169
BALB/cJ	M	LL3-2	2016/04/11	27.6	Training	72	77812	1473	2260	Training_170
SM/J	M	LL3-2	2016/12/27	23	Validation	88	108780	5453	2261	Validation_25
DBA/2J	F	LL5-3	2015/12/14	20.3	Training	116	65245	1085	2262	Training_171
BALB/cJ	M	LL4-4	2016/04/11	28.6	Training	105	86553	4239	2263	Training_172
B6129PF1/J	M	LL4-3	2016/04/28	25.6	Training	107	65144	4231	2264	Training_173
MOLF/EiJ	F	LL2-2	2017/01/12	14.1	Training	59	10102	1640	2289	Training_174
BUB/BnJ	F	LL3-2	2016/12/28	23.6	Training	89	57588	2026	2290	Training_175
C57BLKS/J	F	LL1-3	2016/02/09	20.1	Training	7	98967	929	2291	Training_176
SM/J	M	LL3-1	2016/12/27	23.4	Training	87	83897	837	2292	Training_177
BUB/BnJ	F	LL3-2	2016/12/28	23.6	Training	89	63313	878	2293	Training_178
PWD/PhJ	M	LL1-4	2016/12/27	18.4	Training	25	14172	2705	2294	Training_179
WBB6F1/J-Kit<W>/Kit<W-v>/J	F	LL4-2	2016/03/30	20.9	Training	103	120628	1144	2295	Training_180
C57L/J	M	LL4-4	2016/05/09	27.5	Training	110	119312	633	2304	Training_181
MRL/MpJ	F	LL4-2	2016/04/18	34.8	Training	106	67264	1187	2305	Training_182
C57BL/6NJ	F	LL3-1	2016/06/10	21.8	Training	83	99433	669	2306	Training_183
SEA/GnJ	M	LL6-1	2017/01/12	25.5	Training	157	40650	648	2307	Training_184
129P3/J	F	LL3-4	2016/04/12	20.6	Training	74	78765	1345	2308	Training_185
C57BL/6J	M	LL4-2	2016/07/19	30.4	Training	113	73411	2145	2309	Training_186
LP/J	M	LL4-3	2016/01/26	23.4	Training	96	18574	1273	2310	Training_187
MA/MyJ	M	LL1-4	2017/01/24	33.5	Training	30	102951	939	2311	Training_188
CZECHII/EiJ	F	LL3-2	2017/01/04	13	Validation	91	44704	1020	2312	Validation_26
B6129SF1/J	F	LL5-2	2016/05/19	20.3	Training	133	37769	3688	2313	Training_189
TALLYHO/JngJ	F	LL4-2	2016/05/04	40.3	Training	109	39358	2139	2314	Training_190
CAST/EiJ	F	LL6-2	2016/03/30	12.6	Validation	146	26317	895	2315	Validation_27
DBA/2J	M	LL3-1	2015/12/21	27.2	Training	60	104049	1834	2316	Training_191
NON/ShiLtJ	M	LL3-1	2016/04/13	28	Training	75	110681	743	2317	Training_192
C3H/HeJ	M	LL4-2	2016/02/08	25.9	Training	97	61276	1721	2318	Training_193
C57BL/6J-A<w-J>/J	F	LL4-3	2016/06/20	20.7	Training	112	21583	754	2319	Training_194
MA/MyJ	M	LL1-4	2017/01/24	33.5	Training	30	4631	654	2320	Training_195
KK.Cg-A<y>/J	F	LL3-2	2016/08/19	34.9	Training	84	41516	3572	2321	Training_196
LP/J	F	LL2-1	2016/01/26	16.6	Validation	35	99588	6018	2322	Validation_28
NOD/ShiLtJ	F	LL5-2	2016/05/26	19.9	Training	136	110109	1207	2323	Training_197
CBA/CaJ	M	LL3-1	2016/06/09	27.8	Validation	82	41734	1639	2324	Validation_29
SM/J	M	LL3-1	2016/12/27	23.4	Training	87	66552	634	2325	Training_198
CAF1/J	M	LL1-3	2016/04/07	26.2	Training	16	84820	1358	2326	Training_199
C3H/HeOuJ	F	LL3-3	2016/03/28	21	Validation	66	103328	3556	2327	Validation_30
LP/J	F	LL2-1	2016/01/26	16.6	Training	35	107957	1155	2328	Training_200
A/J	F	LL1-1	2016/04/06	19.5	Training	14	29837	2168	2329	Training_201
B6129PF1/J	F	LL1-2	2016/05/05	19	Training	22	71777	1095	2330	Training_202
DBA/2J	M	LL3-1	2015/12/21	27.2	Training	60	3215	934	2331	Training_203
KK/HiJ	M	LL6-2	2016/12/27	31.1	Training	155	80783	5908	2332	Training_204
KK.Cg-A<y>/J	F	LL3-4	2016/08/19	26.9	Validation	86	119328	1435	2333	Validation_31
C57L/J	M	LL4-4	2016/05/09	27.5	Training	110	39833	621	2334	Training_205
NOR/LtJ	M	LL2-3	2016/04/18	27.8	Training	43	53001	2118	2335	Training_206
BTBR T<+>ltpr3<tf>/J	M	LL2-4	2015/12/08	32	Training	33	75736	1966	2336	Training_207
MOLF/EiJ	F	LL5-3	2017/01/04	14.8	Training	140	91430	23164	2337	Training_208
CAF1/J	M	LL1-3	2016/04/07	26.2	Validation	16	109550	2644	2338	Validation_32
B6CBAF1/J	M	LL2-4	2016/04/29	30.5	Training	45	105542	2556	2339	Training_209
SM/J	M	LL3-1	2016/12/27	23.4	Training	87	49702	714	2340	Training_210
SWR/J	F	LL2-2	2016/05/03	19.1	Training	47	4267	1401	2341	Training_211
C57BLKS/J	M	LL2-2	2016/03/01	27.3	Training	39	84652	948	2342	Training_212
C57BL/6J-A<w-J>/J	F	LL4-3	2016/06/20	20.7	Training	112	44581	925	2343	Training_213
BALB/cByJ	M	LL5-3	2016/02/16	28	Training	122	23087	2829	2344	Training_214
KK.Cg-A<y>/J	F	LL3-3	2016/08/19	30.4	Training	85	53831	854	2345	Training_215
LP/J	M	LL6-1	2016/04/20	19.7	Training	152	98183	2339	2346	Training_216
CAF1/J	F	LL2-4	2016/05/02	22.6	Training	46	97323	1653	2347	Training_217
C3HeB/FeJ	F	LL3-2	2016/01/12	24.1	Training	63	95438	2590	2348	Training_218
SEA/GnJ	M	LL6-1	2017/01/12	25.5	Training	157	19433	1855	2349	Training_219
NZW/LacJ	M	LL3-1	2016/01/25	NA	Training	64	36877	1258	2350	Training_220
NZB/BlNJ	F	LL2-4	2016/05/17	22.9	Training	53	35211	3138	2351	Training_221
B6SJLF1/J	F	LL4-3	2016/03/14	18.6	Training	101	73785	1599	2352	Training_222
BALB/cJ	M	LL3-2	2016/04/11	27.6	Training	72	61826	5153	2353	Training_223
B6CBAF1/J	F	LL4-3	2016/05/03	20.9	Training	108	91581	1165	2354	Training_224
DBA/2J	F	LL5-1	2016/07/01	29.8	Training	139	31171	1734	2355	Training_225
WBB6F1/J-Kit<W>/Kit<W-v>/J	M	LL1-2	2016/03/23	25.3	Training	12	59489	1077	2356	Training_226
C57BL/6J-A<w-J>/J	M	LL6-3	2016/06/09	23.2	Training	154	83522	653	2357	Training_227
C57L/J	M	LL4-4	2016/05/09	27.5	Training	110	40754	626	2358	Training_228
PL/J	F	LL5-2	2016/02/15	18.1	Training	120	78867	3904	2359	Training_229
C3H/HeJ	F	LL1-1	2015/12/22	20	Validation	1	79028	945	2360	Validation_33
MOLF/EiJ	F	LL5-3	2017/01/04	14.8	Training	140	120000	2188	2361	Training_230
TALLYHO/JngJ	F	LL1-3	2016/04/29	36.5	Training	20	89238	1318	2362	Training_231
B6D2F1/J	F	LL5-3	2016/04/14	21.6	Training	127	9060	603	2363	Training_232
DBA/1J	M	LL2-3	2015/12/07	20	Training	31	101570	1485	2364	Training_233
RIIIS/J	F	LL5-1	2017/01/24	16.7	Training	141	59184	976	2365	Training_234
CBA/J	F	LL2-1	2016/05/10	20.2	Training	48	68110	5026	2366	Training_235
C57L/J	F	LL1-2	2016/02/02	18.2	Training	5	58981	584	2367	Training_236
NON/ShiLtJ	F	LL2-4	2016/04/04	28.7	Training	41	114331	3077	2368	Training_237
129S1/SvlmJ	M	LL2-4	2016/05/11	23.6	Training	52	56305	795	2369	Training_238
129P3/J	F	LL3-3	2016/04/12	18.6	Training	73	26756	2274	2377	Training_239
CBA/CaJ	F	LL5-1	2016/02/09	22.1	Training	119	73954	847	2378	Training_240
SEA/GnJ	M	LL6-1	2017/01/12	25.5	Training	157	30291	1932	2379	Training_241
MA/MyJ	M	LL1-4	2017/01/24	33.5	Training	30	30236	1280	2380	Training_242
C57BL/6J	F	LL5-3	2016/02/01	18.8	Validation	118	99377	3384	2381	Validation_34
DBA/1J	M	LL3-2	2016/04/20	22.7	Training	77	86636	866	2382	Training_243
NOD/ShiLtJ	M	LL5-1	2016/04/13	20.6	Training	125	58141	1191	2383	Training_244
CBA/CaJ	F	LL6-2	2016/02/09	21.5	Training	143	87968	4013	2384	Training_245
DBA/2J	M	LL3-1	2015/12/21	27.2	Training	60	84762	1663	2385	Training_246
NOD/ShiLtJ	M	LL5-1	2016/04/13	20.6	Training	125	82352	1240	2386	Training_247
C3H/HeOuJ	M	LL1-2	2016/03/22	27.8	Training	11	41607	1314	2387	Training_248
C57BL/6J-A<w-J>/J	F	LL4-3	2016/06/20	20.7	Training	112	72947	1460	2388	Training_249
A/J	F	LL1-1	2016/04/06	19.5	Training	14	8819	900	2389	Training_250
CAST/EiJ	M	LL4-3	2016/01/19	16.2	Validation	95	45943	2418	2390	Validation_35
DBA/2J	M	LL3-1	2015/12/21	27.2	Training	60	36723	1228	2391	Training_251
MA/MyJ	M	LL4-2	2017/01/12	23.6	Training	115	44775	747	2392	Training_252
B6129PF1/J	M	LL5-3	2016/04/28	30.6	Training	131	97472	4039	2393	Training_253
DBA/2J	M	LL3-1	2015/12/21	27.2	Training	60	44868	1350	2394	Training_254
KK/HiJ	M	LL6-2	2016/12/27	31.1	Training	155	88463	21230	2395	Training_255
129S1/SvlmJ	M	LL2-2	2016/05/11	23.3	Training	50	72459	1030	2396	Training_256
PWD/PhJ	F	LL1-3	2017/01/04	15.2	Training	27	30773	1954	2397	Training_257
BUB/BnJ	M	LL2-1	2016/12/27	31.8	Training	57	25166	638	2398	Training_258
CBA/J	F	LL2-4	2016/05/10	22.1	Training	49	12080	901	2399	Training_259
LP/J	M	LL6-1	2016/04/20	19.7	Training	152	21014	1415	2400	Training_260
TALLYHO/JngJ	F	LL3-3	2016/05/04	35.8	Training	80	110609	850	2401	Training_261
C57BLKS/J	F	LL1-3	2016/02/09	20.1	Training	7	40310	1390	2402	Training_262
LP/J	M	LL4-3	2016/01/26	23.4	Training	96	17574	880	2403	Training_263
TALLYHO/JngJ	F	LL4-2	2016/05/04	40.3	Training	109	3873	805	2404	Training_264
C57BL/6J-Kit<W-v>/J	F	LL5-4	2016/03/01	23.2	Training	123	108248	1170	2405	Training_265
B6SJLF1/J	F	LL4-3	2016/03/14	18.6	Training	101	60142	1077	2406	Training_266
A/J	M	LL1-1	2016/03/28	22.6	Training	13	96505	21977	2407	Training_267
CBA/CaJ	F	LL6-2	2016/02/09	21.5	Training	143	75219	1246	2408	Training_268
C57L/J	F	LL1-2	2016/02/02	18.2	Training	5	72184	748	2409	Training_269
BUB/BnJ	M	LL2-1	2016/12/27	31.8	Training	57	81488	599	2410	Training_270
C57BL/10SnJ	M	LL6-3	2016/04/06	31.9	Training	149	90014	1846	2411	Training_271
CAST/EiJ	F	LL2-4	2016/01/19	14.3	Training	34	95370	1386	2412	Training_272
BUB/BnJ	F	LL3-2	2016/12/28	23.6	Training	89	77425	3770	2413	Training_273
BTBR T<+>ltpr3<tf>/J	M	LL2-4	2015/12/08	32	Validation	33	48374	2661	2414	Validation_36
MOLF/EiJ	F	LL5-3	2017/01/04	14.8	Training	140	49266	2481	2415	Training_274
BUB/BnJ	M	LL2-1	2016/12/27	31.8	Training	57	99181	3939	2416	Training_275
129S1/SvlmJ	M	LL2-2	2016/05/11	23.3	Training	50	92652	1284	2417	Training_276
SEA/GnJ	M	LL3-3	2017/01/24	23.7	Training	93	22420	2097	2418	Training_277
TALLYHO/JngJ	F	LL3-3	2016/05/04	35.8	Validation	80	26754	902	2419	Validation_37
CAST/EiJ	M	LL4-3	2016/01/19	16.2	Training	95	101180	1854	2420	Training_278
SM/J	M	LL3-1	2016/12/27	23.4	Training	87	74762	677	2421	Training_279
A/J	F	LL1-1	2016/04/06	19.5	Training	14	112492	3878	2422	Training_280
NZB/BlNJ	F	LL2-4	2016/05/17	22.9	Training	53	119120	1458	2423	Training_281
DBA/2J	F	LL5-1	2016/07/01	29.8	Training	139	22961	663	2424	Training_282
LG/J	F	LL3-4	2016/12/28	31.5	Training	90	71610	1686	2425	Training_283
C57BLKS/J	M	LL2-2	2016/03/01	27.3	Training	39	49926	3310	2426	Training_284
DBA/1J	M	LL2-3	2015/12/07	20	Training	31	47566	2067	2427	Training_285
BALB/cJ	M	LL4-4	2016/04/11	28.6	Validation	105	64608	2799	2428	Validation_38
B6D2F1/J	F	LL5-4	2016/04/14	21.8	Training	128	56394	788	2429	Training_286
MOLF/EiJ	F	LL5-3	2017/01/04	14.8	Training	140	63428	1348	2430	Training_287
NZW/LacJ	M	LL3-1	2016/01/25	NA	Validation	64	58462	1878	2431	Validation_39
C57BL/6J	M	LL4-2	2016/07/19	30.4	Training	113	58869	4015	2432	Training_288
DBA/1J	M	LL6-4	2016/04/04	25.2	Training	147	95220	1409	2433	Training_289
C57BLKS/J	M	LL2-2	2016/03/01	27.3	Training	39	84652	948	2434	Training_290
C3H/HeJ	M	LL4-2	2016/02/08	25.9	Training	97	77080	867	2435	Training_291
CByB6F1/J	M	LL6-2	2016/04/06	26.1	Training	148	67739	2863	2436	Training_292
PL/J	F	LL5-2	2016/02/15	18.1	Training	120	51801	1060	2437	Training_293
CZECHII/EiJ	F	LL3-4	2017/01/04	11	Training	92	51960	2735	2438	Training_294
CByB6F1/J	M	LL6-2	2016/04/06	26.1	Training	148	63423	1028	2439	Training_295
CAF1/J	M	LL1-3	2016/04/07	26.2	Validation	16	114882	1759	2440	Validation_40
CAST/EiJ	M	LL4-3	2016/01/19	16.2	Training	95	34409	730	2441	Training_296
PWD/PhJ	F	LL1-3	2016/12/28	15	Training	26	21358	3382	2442	Training_297
MA/MyJ	M	LL4-2	2017/01/12	23.6	Training	115	65951	1398	2443	Training_298
C57BL/10SnJ	M	LL6-3	2016/04/06	31.9	Validation	149	156139	1451	2444	Validation_41
DBA/1J	M	LL3-2	2016/04/20	22.7	Training	77	82193	1125	2445	Training_299
AKR/J	M	LL3-2	2016/04/05	35.3	Training	70	89852	3271	2446	Training_300
B6129SF1/J	M	LL4-3	2016/06/06	35.6	Training	111	13673	1013	2447	Training_301
C57BL/6J-A<w-J>/J	F	LL5-4	2016/06/20	21.3	Training	138	91882	1886	2448	Training_302
LG/J	F	LL3-4	2016/12/28	31.5	Training	90	96616	2406	2449	Training_303
CB6F1/J	M	LL4-4	2016/03/29	29.9	Training	102	90803	1019	2450	Training_304
WBB6F1/J-Kit<W>/Kit<W-v>/J	F	LL4-2	2016/03/30	20.9	Training	103	39792	1455	2451	Training_305
SWR/J	F	LL3-2	2016/05/03	16.8	Training	79	77448	2677	2452	Training_306
CZECHII/EiJ	F	LL1-1	2017/01/12	12.2	Training	28	96439	2039	2453	Training_307
MOLF/EiJ	F	LL5-3	2017/01/04	14.8	Training	140	48014	967	2454	Training_308
A/J	F	LL1-2	2016/04/06	20.4	Validation	15	47072	2431	2455	Validation_42
CBA/J	F	LL2-1	2016/05/10	20.2	Training	48	92858	4727	2456	Training_309
DBA/2J	F	LL5-3	2015/12/14	20.3	Validation	116	99588	763	2457	Validation_43
A/J	F	LL1-2	2016/04/06	20.4	Training	15	142205	5634	2458	Training_310
BTBR T<+>ltpr3<tf>/J	M	LL2-4	2015/12/08	32	Training	33	36353	3235	2459	Training_311
SEA/GnJ	M	LL3-3	2017/01/24	23.7	Validation	93	60068	1484	2460	Validation_44
TALLYHO/JngJ	F	LL4-2	2016/05/04	40.3	Training	109	69785	1218	2461	Training_312
B6C3F1/J	M	LL1-4	2016/04/28	31	Training	19	112597	5744	2462	Training_313
DBA/1J	M	LL3-2	2016/04/20	22.7	Training	77	111005	1038	2463	Training_314
PL/J	M	LL4-3	2016/02/15	27.1	Training	98	36181	1095	2464	Training_315
C3HeB/FeJ	M	LL1-1	2016/01/12	24.5	Training	2	93667	592	2465	Training_316
B6129SF1/J	F	LL5-2	2016/05/19	20.3	Training	133	55207	3736	2466	Training_317
SWR/J	F	LL3-2	2016/05/03	16.8	Training	79	69104	1483	2467	Training_318
C57BL/10SnJ	M	LL6-3	2016/04/06	31.9	Training	149	25107	692	2468	Training_319
MOLF/EiJ	F	LL5-3	2017/01/04	14.8	Training	140	80449	6516	2469	Training_320
BALB/cJ	M	LL4-4	2016/04/11	28.6	Training	105	81163	4092	2470	Training_321
CZECHII/EiJ	F	LL3-2	2017/01/04	13	Validation	91	86174	1199	2471	Validation_45
SEA/GnJ	M	LL6-1	2017/01/12	25.5	Training	157	73845	951	2472	Training_322
RIIIS/J	F	LL5-1	2017/01/24	16.7	Training	141	56157	2951	2473	Training_323
CBA/J	F	LL2-4	2016/05/10	22.1	Training	49	31280	857	2474	Training_324
CByB6F1/J	M	LL6-2	2016/04/06	26.1	Training	148	97549	1904	2475	Training_325
A/J	F	LL1-2	2016/04/06	20.4	Validation	15	135474	4094	2476	Validation_46
MA/MyJ	M	LL1-2	2017/01/24	21.4	Training	29	42753	3685	2491	Training_326
B6AF1/J	M	LL1-4	2016/04/14	25.5	Training	17	75369	3835	2492	Training_327
PWD/PhJ	F	LL1-3	2016/12/28	15	Training	26	85744	5374	2493	Training_328
CAF1/J	F	LL2-4	2016/05/02	22.6	Training	46	73811	775	2494	Training_329
C3HeB/FeJ	M	LL1-1	2016/01/12	24.5	Training	2	47951	779	2495	Training_330
SM/J	M	LL3-1	2016/12/27	23.4	Training	87	58819	681	2496	Training_331
B6(CG)-Tyr<o-2J>/J	M	LL5-3	2016/05/20	25.2	Training	135	38310	967	2497	Training_332
C3HeB/FeJ	M	LL1-2	2016/01/12	25.5	Training	3	103122	791	2498	Training_333
B6SJLF1/J	F	LL4-3	2016/03/14	18.6	Training	101	34934	838	2499	Training_334
CB6F1/J	M	LL3-4	2016/03/29	30.4	Training	67	59204	1124	2501	Training_335
B6129SF1/J	F	LL5-2	2016/05/19	20.3	Validation	133	84649	2034	2502	Validation_47
TALLYHO/JngJ	F	LL1-3	2016/04/29	36.5	Training	20	21127	2513	2503	Training_336
129S1/SvlmJ	M	LL2-2	2016/05/11	23.3	Training	50	88944	2315	2504	Training_337
CAST/EiJ	F	LL2-4	2016/01/19	14.3	Training	34	20649	679	2505	Training_338
SWR/J	F	LL3-2	2016/05/03	16.8	Validation	79	86622	2186	2506	Validation_48
C57BL/6NJ	M	LL4-4	2015/12/08	27.8	Training	94	27997	1707	2507	Training_339
LP/J	F	LL2-1	2016/01/26	16.6	Training	35	39768	8364	2508	Training_340
TALLYHO/JngJ	F	LL4-2	2016/05/04	40.3	Training	109	13136	925	2509	Training_341
KK.Cg-A<y>/J	F	LL3-2	2016/08/19	34.9	Training	84	83668	928	2510	Training_342
DBA/1J	M	LL2-3	2015/12/07	20	Training	31	77964	10270	2511	Training_343
PL/J	M	LL4-3	2016/02/15	27.1	Training	98	45231	957	2512	Training_344
CBA/CaJ	M	LL3-1	2016/06/09	27.8	Training	82	13478	1062	2513	Training_345
MOLF/EiJ	F	LL5-3	2017/01/04	14.8	Training	140	66242	8619	2514	Training_346
MA/MyJ	M	LL1-2	2017/01/24	21.4	Training	29	85699	2124	2515	Training_347
B6AF1/J	M	LL2-1	2016/03/07	28.2	Training	40	49213	1858	2516	Training_348
DBA/1J	M	LL3-2	2016/04/20	22.7	Training	77	106030	929	2517	Training_349
NOR/LtJ	F	LL2-1	2016/02/16	20.4	Training	36	102953	1891	2518	Training_350
C57BL/10SnJ	M	LL6-4	2016/04/06	29.7	Training	150	29538	959	2519	Training_351
B6SJLF1/J	F	LL4-3	2016/03/14	18.6	Training	101	94001	886	2520	Training_352
TALLYHO/JngJ	F	LL4-2	2016/05/04	40.3	Training	109	44771	1016	2521	Training_353
129S1/SvlmJ	M	LL2-4	2016/05/11	23.6	Training	52	88473	1632	2522	Training_354
DBA/1J	M	LL6-4	2016/04/04	25.2	Validation	147	32841	1091	2523	Validation_49
129P3/J	M	LL1-3	2016/04/18	20.1	Training	18	104775	1379	2524	Training_355
C57BLKS/J	M	LL2-2	2016/03/01	27.3	Training	39	75154	1089	2525	Training_356
SEA/GnJ	F	LL6-2	2017/01/04	23.6	Training	156	85453	3083	2529	Training_357
B6129SF1/J	F	LL5-2	2016/05/19	20.3	Validation	133	15712	1822	2535	Validation_50
MRL/MpJ	F	LL4-2	2016/04/18	34.8	Training	106	117323	5534	2536	Training_358
B6129SF1/J	F	LL5-2	2016/05/19	20.3	Validation	133	97978	1430	2538	Validation_51
TALLYHO/JngJ	F	LL4-2	2016/05/04	40.3	Training	109	54042	2133	2539	Training_359
C57L/J	M	LL4-4	2016/05/09	27.5	Training	110	49880	854	2541	Training_360
C57L/J	F	LL1-2	2016/02/02	18.2	Training	5	67589	2691	2547	Training_361
C3H/HeJ	F	LL1-1	2015/12/22	20	Training	1	89208	3467	2549	Training_362
B6129PF1/J	M	LL4-3	2016/04/28	25.6	Training	107	43975	1408	2552	Training_363
B6(CG)-Tyr<o-2J>/J	M	LL5-1	2016/05/20	26.2	Validation	134	58115	1109	2554	Validation_52
CAF1/J	M	LL1-3	2016/04/07	26.2	Training	16	66239	2290	2557	Training_364
B6CBAF1/J	F	LL4-3	2016/05/03	20.9	Training	108	107408	5513	2558	Training_365
DBA/1J	M	LL2-3	2015/12/07	20	Training	31	98774	2397	2565	Training_366
PWD/PhJ	F	LL1-3	2016/12/28	15	Training	26	39076	2083	2568	Training_367
A/J	F	LL1-2	2016/04/06	20.4	Training	15	59519	2709	2575	Training_368
CBA/CaJ	F	LL5-1	2016/02/09	22.1	Training	119	76705	1693	2576	Training_369
C57BLKS/J	M	LL2-2	2016/03/01	27.3	Training	39	79325	902	2578	Training_370
DBA/1J	M	LL6-4	2016/04/04	25.2	Training	147	67338	1290	2580	Training_371
DBA/2J	M	LL3-1	2015/12/21	27.2	Training	60	97693	6076	2583	Training_372
B6AF1/J	M	LL2-1	2016/03/07	28.2	Training	40	84734	1598	2588	Training_373
CByB6F1/J	M	LL6-2	2016/04/06	26.1	Training	148	104953	1421	2589	Training_374
CAF1/J	M	LL1-3	2016/04/07	26.2	Training	16	43128	1327	2590	Training_375
B6129PF1/J	F	LL1-2	2016/05/05	19	Training	22	119098	701	2597	Training_376
B6129SF1/J	M	LL4-3	2016/06/06	35.6	Training	111	45229	2968	2600	Training_377
CZECHII/EiJ	F	LL3-2	2017/01/04	13	Training	91	25996	2981	2612	Training_378
WB/ReJ Kit<W>/J	M	LL2-1	2016/02/23	26.1	Training	37	19850	1034	2615	Training_379
MOLF/EiJ	F	LL5-3	2017/01/04	14.8	Training	140	118544	1423	2616	Training_380
KK/HiJ	F	LL4-2	2017/01/04	32.5	Validation	114	102753	1207	2620	Validation_53
B6D2F1/J	F	LL5-3	2016/04/14	21.6	Validation	127	97602	801	2621	Validation_54
DBA/1J	M	LL6-4	2016/04/04	25.2	Training	147	44398	1609	2622	Training_381
C3H/HeOuJ	M	LL1-2	2016/03/22	27.8	Training	11	59468	824	2627	Training_382
C57L/J	F	LL1-2	2016/02/02	18.2	Training	5	70402	1056	2628	Training_383
BALB/cByJ	M	LL5-3	2016/02/16	28	Training	122	76376	1865	2629	Training_384
CAF1/J	F	LL1-2	2016/05/02	25.7	Training	21	11254	1318	2635	Training_385
B6129SF1/J	F	LL5-2	2016/05/19	20.3	Training	133	125828	2023	2640	Training_386
CAF1/J	F	LL1-2	2016/05/02	25.7	Training	21	38047	1964	2641	Training_387
TALLYHO/JngJ	F	LL4-2	2016/05/04	40.3	Training	109	102468	805	2647	Training_388
DBA/2J	F	LL5-1	2016/07/01	29.8	Training	139	108568	5626	2652	Training_389
B6AF1/J	F	LL4-3	2016/03/07	19	Validation	99	44484	591	2657	Validation_55
DBA/2J	F	LL5-1	2016/07/01	29.8	Training	139	10449	884	2658	Training_390
AKR/J	F	LL3-4	2016/04/04	29.9	Validation	69	38177	1491	2659	Validation_56
NZBWF1/J	F	LL2-2	2016/07/01	38.6	Training	55	20657	1892	2660	Training_391
SEA/GnJ	M	LL6-1	2017/01/12	25.5	Training	157	74814	2987	2667	Training_392
NON/ShiLtJ	F	LL2-4	2016/04/04	28.7	Validation	41	17638	1254	2668	Validation_57
PWD/PhJ	M	LL1-4	2016/12/27	18.4	Training	25	9632	1135	2675	Training_393
129P3/J	F	LL3-3	2016/04/12	18.6	Training	73	24702	884	2677	Training_394
PL/J	M	LL4-3	2016/02/15	27.1	Training	98	19738	786	2683	Training_395
DBA/2J	F	LL5-3	2015/12/14	20.3	Training	116	100576	7429	2688	Training_396
NZBWF1/J	F	LL2-2	2016/07/01	38.6	Validation	55	40717	2640	2690	Validation_58
NOD/ShiLtJ	M	LL5-1	2016/04/13	20.6	Training	125	99434	1022	2692	Training_397
TALLYHO/JngJ	F	LL1-3	2016/04/29	36.5	Training	20	122596	2638	2695	Training_398
WBB6F1/J-Kit<W>/Kit<W-v>/J	F	LL4-2	2016/03/30	20.9	Training	103	94754	857	2700	Training_399
NON/ShiLtJ	M	LL3-1	2016/04/13	28	Validation	75	78610	1202	2701	Validation_59
MOLF/EiJ	F	LL5-3	2017/01/04	14.8	Training	140	115024	3506	2706	Training_400
CBA/CaJ	M	LL3-1	2016/06/09	27.8	Validation	82	3470	677	2717	Validation_60
DBA/2J	F	LL5-1	2016/07/01	29.8	Training	139	35268	1197	2718	Training_401
SWR/J	F	LL3-2	2016/05/03	16.8	Training	79	43085	1063	2719	Training_402
CAST/EiJ	F	LL2-4	2016/01/19	14.3	Training	34	63849	831	2721	Training_403
CAF1/J	M	LL1-3	2016/04/07	26.2	Validation	16	125316	1342	2722	Validation_61
CBA/J	F	LL2-4	2016/05/10	22.1	Training	49	60676	753	2726	Training_404
B6SJLF1/J	F	LL4-3	2016/03/14	18.6	Training	101	27847	871	2727	Training_405
MA/MyJ	M	LL1-4	2017/01/24	33.5	Training	30	73698	597	2728	Training_406
DBA/1J	M	LL6-4	2016/04/04	25.2	Training	147	99770	8542	2733	Training_407
MA/MyJ	M	LL1-2	2017/01/24	21.4	Training	29	71789	901	2734	Training_408
DBA/1J	M	LL2-3	2015/12/07	20	Training	31	49647	4013	2739	Training_409
C57BL/6J	F	LL2-4	2016/09/13	25.5	Training	56	30040	862	2741	Training_410
C57L/J	F	LL1-2	2016/02/02	18.2	Training	5	77938	2605	2742	Training_411
KK.Cg-A<y>/J	F	LL3-3	2016/08/19	30.4	Validation	85	89641	935	2744	Validation_62
MOLF/EiJ	F	LL2-2	2017/01/12	14.1	Training	59	12262	5132	2745	Training_412
DBA/1J	M	LL2-3	2015/12/07	20	Training	31	33269	3131	2754	Training_413
DBA/1J	M	LL3-2	2016/04/20	22.7	Training	77	91410	3402	2757	Training_414
LG/J	F	LL3-4	2016/12/28	31.5	Training	90	39023	581	2758	Training_415
C3H/HeJ	F	LL6-1	2016/02/08	19.9	Training	142	109220	4020	2759	Training_416
CByB6F1/J	M	LL4-3	2016/03/08	28.4	Training	100	49079	929	2762	Training_417
WBB6F1/J-Kit<W>/Kit<W-v>/J	F	LL4-2	2016/03/30	20.9	Training	103	44961	1021	2772	Training_418
B6C3F1/J	F	LL6-1	2016/04/07	20.9	Training	151	103368	937	2775	Training_419
CBA/CaJ	F	LL5-1	2016/02/09	22.1	Training	119	72840	624	2777	Training_420
WBB6F1/J-Kit<W>/Kit<W-v>/J	F	LL4-2	2016/03/30	20.9	Training	103	41291	1523	2778	Training_421
MRL/MpJ	F	LL4-2	2016/04/18	34.8	Training	106	60836	1529	2782	Training_422
NOR/LtJ	M	LL2-3	2016/04/18	27.8	Training	43	29217	1273	2785	Training_423
B6.SJL-Ptprc<a> Pepc<b>/BoyJ	F	LL3-2	2016/01/11	22.6	Training	61	87748	774	2789	Training_424
PWD/PhJ	F	LL1-3	2016/12/28	15	Training	26	26803	3261	2790	Training_425
AKR/J	F	LL5-4	2016/04/04	25.1	Training	124	100886	1356	2791	Training_426
MA/MyJ	M	LL1-2	2017/01/24	21.4	Training	29	61476	1208	2794	Training_427
NOR/LtJ	F	LL5-4	2016/04/18	20.8	Training	130	90537	754	2797	Training_428
CB6F1/J	M	LL1-4	2016/03/15	28.7	Training	9	78886	834	2801	Training_429
C57BL/6J	F	LL2-4	2016/09/13	25.5	Training	56	16553	964	2807	Training_430
129S1/SvlmJ	M	LL2-3	2016/05/11	22.6	Training	51	106640	1423	2813	Training_431
DBA/1J	M	LL6-4	2016/04/04	25.2	Training	147	79916	1644	2814	Training_432
129X1/SvJ	M	LL2-4	2016/04/20	23.3	Training	44	90642	4590	2818	Training_433
B6D2F1/J	F	LL5-3	2016/04/14	21.6	Training	127	16279	1024	2822	Training_434
LP/J	F	LL2-1	2016/01/26	16.6	Training	35	11348	2020	2823	Training_435
TALLYHO/JngJ	F	LL3-3	2016/05/04	35.8	Training	80	25596	974	2824	Training_436
A/J	F	LL1-1	2016/04/06	19.5	Training	14	7327	1291	2827	Training_437
C3H/HeOuJ	M	LL1-2	2016/03/22	27.8	Training	11	36998	583	2831	Training_438
TALLYHO/JngJ	F	LL3-3	2016/05/04	35.8	Training	80	77306	2064	2842	Training_439
B6D2F1/J	F	LL5-4	2016/04/14	21.8	Validation	128	68225	877	2843	Validation_63
SM/J	M	LL3-1	2016/12/27	23.4	Training	87	103507	934	2850	Training_440
B6129PF1/J	F	LL1-2	2016/05/05	19	Training	22	54368	1012	2858	Training_441
DBA/2J	M	LL3-1	2015/12/21	27.2	Training	60	54509	1605	2862	Training_442
NZW/LacJ	M	LL3-1	2016/01/25	NA	Training	64	92549	15456	2863	Training_443
MOLF/EiJ	F	LL2-2	2017/01/12	14.1	Training	59	50207	5619	2865	Training_444
CAF1/J	M	LL1-3	2016/04/07	26.2	Training	16	20204	1098	2869	Training_445
PWD/PhJ	F	LL1-3	2017/01/04	15.2	Training	27	37739	2398	2871	Training_446
C57BL/6J	F	LL2-4	2016/09/13	25.5	Training	56	4512	960	2873	Training_447
DBA/1J	M	LL6-4	2016/04/04	25.2	Training	147	56185	1206	2874	Training_448
KK.Cg-A<y>/J	F	LL3-2	2016/08/19	34.9	Training	84	76381	5627	2876	Training_449
WBB6F1/J-Kit<W>/Kit<W-v>/J	M	LL1-2	2016/03/23	25.3	Training	12	29296	720	2878	Training_450
DBA/2J	F	LL5-3	2015/12/14	20.3	Training	116	47474	648	2880	Training_451
CAF1/J	F	LL2-4	2016/05/02	22.6	Training	46	83933	1604	2881	Training_452
SWR/J	F	LL3-2	2016/05/03	16.8	Training	79	80211	1701	2884	Training_453
MA/MyJ	M	LL4-2	2017/01/12	23.6	Training	115	117996	1043	2887	Training_454
A/J	F	LL1-2	2016/04/06	20.4	Training	15	110720	12259	2890	Training_455
BTBR T<+>ltpr3<tf>/J	F	LL2-4	2016/04/13	26	Training	42	97821	16468	2891	Training_456
CAST/EiJ	M	LL4-3	2016/01/19	16.2	Training	95	87821	1009	2894	Training_457
C3H/HeOuJ	F	LL3-3	2016/03/28	21	Training	66	50936	580	2897	Training_458
LP/J	F	LL2-1	2016/01/26	16.6	Training	35	79973	1512	2898	Training_459
C57BL/6J	M	LL4-2	2016/07/19	30.4	Training	113	83367	660	2900	Training_460
SM/J	M	LL3-1	2016/12/27	23.4	Training	87	90417	1095	2901	Training_461
MOLF/EiJ	F	LL5-3	2017/01/04	14.8	Training	140	15947	1331	2907	Training_462
CAF1/J	M	LL1-3	2016/04/07	26.2	Validation	16	16904	1444	2908	Validation_64
AKR/J	M	LL3-2	2016/04/05	35.3	Training	70	24692	667	2911	Training_463
LP/J	F	LL2-1	2016/01/26	16.6	Training	35	18214	1850	2916	Training_464
DBA/2J	F	LL5-1	2016/07/01	29.8	Training	139	25413	750	2919	Training_465
BALB/cJ	M	LL3-2	2016/04/11	27.6	Training	72	28139	1762	2923	Training_466
129X1/SvJ	M	LL2-4	2016/04/20	23.3	Training	44	72916	2146	2926	Training_467
DBA/1J	M	LL6-4	2016/04/04	25.2	Training	147	46501	1968	2928	Training_468
BTBR T<+>ltpr3<tf>/J	M	LL2-2	2015/12/08	35.7	Training	32	66254	4720	2930	Training_469
129S1/SvlmJ	M	LL2-2	2016/05/11	23.3	Training	50	34956	1159	2933	Training_470
BTBR T<+>ltpr3<tf>/J	M	LL2-2	2015/12/08	35.7	Training	32	46091	3811	2939	Training_471
CAF1/J	F	LL1-2	2016/05/02	25.7	Training	21	78163	2171	2941	Training_472
C57BL/6J	M	LL4-2	2016/07/19	30.4	Training	113	93811	3852	2942	Training_473
NOD/ShiLtJ	F	LL5-2	2016/05/26	19.9	Training	136	77565	990	2944	Training_474
LP/J	M	LL4-3	2016/01/26	23.4	Training	96	28492	2067	2946	Training_475
SWR/J	F	LL2-2	2016/05/03	19.1	Training	47	51675	1727	2947	Training_476
RIIIS/J	F	LL5-1	2017/01/24	16.7	Training	141	102846	2527	2950	Training_477
DBA/2J	F	LL5-1	2016/07/01	29.8	Validation	139	60011	2942	2958	Validation_65
SWR/J	F	LL2-2	2016/05/03	19.1	Training	47	88267	14485	2959	Training_478
NOR/LtJ	M	LL2-3	2016/04/18	27.8	Training	43	18939	977	2965	Training_479
BALB/cJ	M	LL4-4	2016/04/11	28.6	Validation	105	106096	1893	2971	Validation_66
LP/J	M	LL4-3	2016/01/26	23.4	Training	96	22059	2151	2973	Training_480
CAF1/J	F	LL1-2	2016/05/02	25.7	Training	21	57424	1039	2974	Training_481
B6SJLF1/J	F	LL4-3	2016/03/14	18.6	Training	101	37962	1766	2991	Training_482
TALLYHO/JngJ	F	LL1-3	2016/04/29	36.5	Training	20	28709	740	2995	Training_483
AKR/J	F	LL3-4	2016/04/04	29.9	Validation	69	108835	15481	3001	Validation_67
DBA/2J	F	LL5-3	2015/12/14	20.3	Training	116	79821	1574	3006	Training_484
SWR/J	F	LL2-2	2016/05/03	19.1	Training	47	85157	881	3007	Training_485
B6129SF1/J	F	LL5-2	2016/05/19	20.3	Training	133	27573	1797	3009	Training_486
PWD/PhJ	F	LL1-3	2016/12/28	15	Training	26	14413	2811	3012	Training_487
DBA/2J	F	LL5-1	2016/07/01	29.8	Validation	139	99948	2302	3015	Validation_68
CAF1/J	F	LL2-4	2016/05/02	22.6	Training	46	106589	698	3019	Training_488
DBA/2J	F	LL5-1	2016/07/01	29.8	Training	139	84336	5183	3021	Training_489
NOR/LtJ	F	LL5-4	2016/04/18	20.8	Validation	130	98913	1264	3022	Validation_69
SWR/J	F	LL3-2	2016/05/03	16.8	Training	79	32010	1784	3025	Training_490
CZECHII/EiJ	F	LL3-2	2017/01/04	13	Training	91	23649	927	3026	Training_491
DBA/1J	M	LL2-3	2015/12/07	20	Training	31	45600	1491	3027	Training_492
B6129PF1/J	M	LL4-3	2016/04/28	25.6	Validation	107	62510	1177	3032	Validation_70
CBA/J	F	LL2-1	2016/05/10	20.2	Training	48	26406	2681	3035	Training_493
DBA/2J	F	LL5-3	2015/12/14	20.3	Training	116	38715	1226	3036	Training_494
MA/MyJ	M	LL1-4	2017/01/24	33.5	Training	30	69329	1925	3037	Training_495
C57L/J	F	LL1-2	2016/02/02	18.2	Training	5	30377	653	3045	Training_496
DBA/2J	F	LL5-3	2015/12/14	20.3	Training	116	61215	2276	3048	Training_497
BTBR T<+>ltpr3<tf>/J	F	LL2-4	2016/04/13	26	Training	42	76223	5951	3050	Training_498
BALB/cByJ	M	LL5-3	2016/02/16	28	Training	122	93142	2524	3055	Training_499
B6CBAF1/J	M	LL2-4	2016/04/29	30.5	Training	45	96470	850	3056	Training_500
129P3/J	F	LL3-4	2016/04/12	20.6	Training	74	28772	990	3057	Training_501
MA/MyJ	M	LL1-4	2017/01/24	33.5	Training	30	98740	1435	3059	Training_502
SWR/J	F	LL2-2	2016/05/03	19.1	Training	47	77335	4319	3063	Training_503
TALLYHO/JngJ	F	LL4-2	2016/05/04	40.3	Training	109	105625	2735	3071	Training_504
B6129SF1/J	M	LL5-4	2016/06/06	38	Training	137	38626	1338	3072	Training_505
FVB/NJ	F	LL5-4	2016/04/13	22	Training	126	58216	1384	3075	Training_506
CBA/CaJ	F	LL5-1	2016/02/09	22.1	Training	119	96593	1349	3078	Training_507
C57BL/6J-Kit<W-v>/J	F	LL5-4	2016/03/01	23.2	Training	123	25328	647	3080	Training_508
NON/ShiLtJ	M	LL3-1	2016/04/13	28	Training	75	46785	1273	3085	Training_509
C57BLKS/J	F	LL1-3	2016/02/09	20.1	Validation	7	107065	2215	3086	Validation_71
129S1/SvlmJ	M	LL2-3	2016/05/11	22.6	Validation	51	37709	2389	3088	Validation_72
TALLYHO/JngJ	F	LL1-3	2016/04/29	36.5	Training	20	61256	3379	3091	Training_510
CBA/CaJ	M	LL3-1	2016/06/09	27.8	Training	82	89938	5827	3092	Training_511
BALB/cJ	M	LL4-1	2016/04/11	31.2	Training	104	88402	1091	3095	Training_512
NZBWF1/J	F	LL2-2	2016/07/01	38.6	Training	55	45707	2012	3096	Training_513
BALB/cJ	M	LL4-4	2016/04/11	28.6	Training	105	34211	2275	3101	Training_514
B6AF1/J	M	LL1-4	2016/04/14	25.5	Training	17	68323	961	3106	Training_515
RIIIS/J	F	LL5-1	2017/01/24	16.7	Training	141	84671	5193	3107	Training_516
C57BL/6NJ	F	LL3-1	2016/06/10	21.8	Training	83	46047	1260	3108	Training_517
CBA/J	F	LL2-4	2016/05/10	22.1	Training	49	94622	8386	3110	Training_518
NON/ShiLtJ	M	LL3-1	2016/04/13	28	Training	75	85778	768	3117	Training_519
TALLYHO/JngJ	F	LL4-2	2016/05/04	40.3	Training	109	1854	1823	3119	Training_520
129P3/J	F	LL3-3	2016/04/12	18.6	Training	73	64047	867	3125	Training_521
A/J	F	LL1-2	2016/04/06	20.4	Validation	15	148965	2470	3127	Validation_73
C3H/HeJ	F	LL1-1	2015/12/22	20	Validation	1	70591	806	3128	Validation_74
BUB/BnJ	F	LL3-2	2016/12/28	23.6	Training	89	40805	1023	3129	Training_522
C3HeB/FeJ	M	LL1-1	2016/01/12	24.5	Training	2	57658	756	3130	Training_523
129S1/SvlmJ	M	LL2-2	2016/05/11	23.3	Training	50	44405	731	3136	Training_524
BUB/BnJ	M	LL2-4	2016/12/27	30.2	Training	58	24795	3762	3137	Training_525
BALB/cByJ	M	LL5-3	2016/02/16	28	Training	122	60063	1132	3139	Training_526
129P3/J	F	LL3-4	2016/04/12	20.6	Training	74	88287	1155	3141	Training_527
PL/J	M	LL4-3	2016/02/15	27.1	Training	98	48873	2491	3143	Training_528
KK.Cg-A<y>/J	F	LL3-4	2016/08/19	26.9	Training	86	82472	1645	3146	Training_529
CBA/CaJ	F	LL5-1	2016/02/09	22.1	Validation	119	19445	1826	3154	Validation_75
MA/MyJ	M	LL1-2	2017/01/24	21.4	Training	29	52772	1123	3157	Training_530
CZECHII/EiJ	F	LL3-4	2017/01/04	11	Training	92	60604	1212	3158	Training_531
C57BL/6NJ	F	LL3-1	2016/06/10	21.8	Training	83	5799	575	3162	Training_532
MA/MyJ	M	LL1-4	2017/01/24	33.5	Training	30	79438	1505	3163	Training_533
NON/ShiLtJ	F	LL3-2	2016/04/04	28.9	Training	68	120698	2034	3169	Training_534
C3H/HeOuJ	M	LL1-2	2016/03/22	27.8	Training	11	97107	1161	3170	Training_535
129S1/SvlmJ	M	LL2-4	2016/05/11	23.6	Training	52	99925	738	3174	Training_536
SWR/J	F	LL3-2	2016/05/03	16.8	Validation	79	36365	3795	3175	Validation_76
129P3/J	F	LL3-4	2016/04/12	20.6	Training	74	108485	7598	3179	Training_537
BTBR T<+>ltpr3<tf>/J	F	LL2-4	2016/04/13	26	Training	42	23298	1260	3182	Training_538
SWR/J	F	LL3-2	2016/05/03	16.8	Training	79	65323	2184	3185	Training_539
CByB6F1/J	M	LL4-3	2016/03/08	28.4	Training	100	82465	3034	3188	Training_540
C57BL/6NJ	M	LL4-4	2015/12/08	27.8	Training	94	103909	500	3190	Training_541
RIIIS/J	F	LL5-1	2017/01/24	16.7	Training	141	71150	7063	3193	Training_542
KK.Cg-A<y>/J	F	LL3-4	2016/08/19	26.9	Training	86	104538	11991	3194	Training_543
129X1/SvJ	M	LL2-4	2016/04/20	23.3	Training	44	97539	1904	3197	Training_544
AKR/J	F	LL5-4	2016/04/04	25.1	Training	124	86998	988	3201	Training_545
MRL/MpJ	F	LL4-2	2016/04/18	34.8	Training	106	122918	2464	3207	Training_546
CAF1/J	F	LL1-2	2016/05/02	25.7	Validation	21	117696	969	3213	Validation_77
129S1/SvlmJ	M	LL2-2	2016/05/11	23.3	Training	50	113814	3216	3214	Training_547
AKR/J	F	LL3-4	2016/04/04	29.9	Training	69	22552	2368	3219	Training_548
C57BL/6NJ	M	LL4-4	2015/12/08	27.8	Training	94	71978	1305	3220	Training_549
WBB6F1/J-Kit<W>/Kit<W-v>/J	M	LL1-2	2016/03/23	25.3	Training	12	57613	599	3221	Training_550
MRL/MpJ	F	LL4-2	2016/04/18	34.8	Training	106	99125	2076	3223	Training_551
C3H/HeJ	F	LL6-1	2016/02/08	19.9	Training	142	102511	1876	3224	Training_552
BTBR T<+>ltpr3<tf>/J	F	LL2-4	2016/04/13	26	Training	42	83483	7807	3226	Training_553
C57BLKS/J	M	LL2-2	2016/03/01	27.3	Training	39	101909	1106	3227	Training_554
B6AF1/J	M	LL2-1	2016/03/07	28.2	Training	40	61275	1635	3228	Training_555
NOR/LtJ	F	LL2-1	2016/02/16	20.4	Training	36	39160	1415	3229	Training_556
CZECHII/EiJ	F	LL3-2	2017/01/04	13	Training	91	33282	3228	3230	Training_557
MRL/MpJ	F	LL5-2	2016/04/18	32.5	Training	129	111365	14250	3231	Training_558
KK.Cg-A<y>/J	F	LL3-2	2016/08/19	34.9	Training	84	64888	1412	3232	Training_559
129P3/J	F	LL3-3	2016/04/12	18.6	Training	73	31024	1484	3233	Training_560
CBA/CaJ	F	LL5-1	2016/02/09	22.1	Training	119	93805	1129	3234	Training_561
129X1/SvJ	M	LL2-4	2016/04/20	23.3	Training	44	58031	2762	3235	Training_562
CAST/EiJ	M	LL4-3	2016/01/19	16.2	Training	95	99630	1001	3236	Training_563
NOD/ShiLtJ	M	LL5-1	2016/04/13	20.6	Training	125	10513	910	3237	Training_564
B6D2F1/J	F	LL5-4	2016/04/14	21.8	Validation	128	27735	856	3238	Validation_78
MA/MyJ	M	LL1-4	2017/01/24	33.5	Training	30	111664	1356	3239	Training_565
C3HeB/FeJ	M	LL1-2	2016/01/12	25.5	Training	3	104077	1456	3240	Training_566
MA/MyJ	M	LL1-4	2017/01/24	33.5	Training	30	57062	805	3241	Training_567
B6129PF1/J	M	LL4-3	2016/04/28	25.6	Training	107	96238	691	3242	Training_568
AKR/J	M	LL3-2	2016/04/05	35.3	Training	70	26773	2651	3243	Training_569
C57BL/6J-A<w-J>/J	M	LL6-3	2016/06/09	23.2	Training	154	32055	768	3244	Training_570
B6(CG)-Tyr<o-2J>/J	M	LL5-1	2016/05/20	26.2	Validation	134	109586	1017	3245	Validation_79
CB6F1/J	M	LL3-4	2016/03/29	30.4	Training	67	68948	1143	3246	Training_571
129P3/J	F	LL3-3	2016/04/12	18.6	Training	73	19328	1120	3247	Training_572
C57BL/6NJ	F	LL3-1	2016/06/10	21.8	Training	83	86160	694	3248	Training_573
CAF1/J	M	LL1-3	2016/04/07	26.2	Validation	16	124032	1075	3249	Validation_80
BTBR T<+>ltpr3<tf>/J	M	LL2-2	2015/12/08	35.7	Training	32	56040	5410	3250	Training_574
129P3/J	M	LL1-3	2016/04/18	20.1	Training	18	72135	1508	3251	Training_575
NZBWF1/J	F	LL2-2	2016/07/01	38.6	Training	55	22601	3681	3252	Training_576
BALB/cJ	M	LL4-4	2016/04/11	28.6	Training	105	53210	2055	3253	Training_577
C3HeB/FeJ	M	LL1-2	2016/01/12	25.5	Training	3	45084	796	3254	Training_578
129P3/J	M	LL1-3	2016/04/18	20.1	Training	18	57708	939	3255	Training_579
C57BL/6J-Kit<W-v>/J	F	LL5-4	2016/03/01	23.2	Training	123	96003	1195	3256	Training_580
BALB/cByJ	M	LL5-1	2016/02/16	29.2	Validation	121	30293	2244	3257	Validation_81
129S1/SvlmJ	M	LL2-2	2016/05/11	23.3	Training	50	73700	1659	3258	Training_581
MRL/MpJ	F	LL5-2	2016/04/18	32.5	Training	129	32347	791	3259	Training_582
B6129SF1/J	M	LL4-3	2016/06/06	35.6	Training	111	80590	1759	3260	Training_583
NOR/LtJ	F	LL5-4	2016/04/18	20.8	Validation	130	92904	2313	3261	Validation_82
C3H/HeJ	F	LL6-1	2016/02/08	19.9	Training	142	72186	1374	3262	Training_584
NOR/LtJ	M	LL2-3	2016/04/18	27.8	Training	43	85351	884	3263	Training_585
KK.Cg-A<y>/J	F	LL3-3	2016/08/19	30.4	Training	85	27783	755	3264	Training_586
NON/ShiLtJ	F	LL3-2	2016/04/04	28.9	Training	68	85581	7193	3265	Training_587
B6CBAF1/J	M	LL2-4	2016/04/29	30.5	Training	45	115995	867	3266	Training_588
LG/J	F	LL3-4	2016/12/28	31.5	Training	90	75278	5352	3267	Training_589
CBA/J	F	LL2-1	2016/05/10	20.2	Training	48	14856	734	3268	Training_590
AKR/J	F	LL3-4	2016/04/04	29.9	Training	69	48155	5414	3269	Training_591
C57BL/10SnJ	F	LL3-3	2016/04/06	23.9	Training	71	117042	1778	3270	Training_592
SWR/J	F	LL3-2	2016/05/03	16.8	Training	79	47227	4922	3271	Training_593
C3H/HeJ	F	LL6-1	2016/02/08	19.9	Training	142	79683	1061	3272	Training_594
MRL/MpJ	F	LL3-2	2016/04/18	32.2	Training	76	81373	1279	3273	Training_595
BTBR T<+>ltpr3<tf>/J	F	LL2-4	2016/04/13	26	Training	42	47120	1387	3274	Training_596
PL/J	F	LL5-2	2016/02/15	18.1	Training	120	89713	7874	3275	Training_597
CZECHII/EiJ	F	LL3-4	2017/01/04	11	Training	92	9040	1333	3276	Training_598
CAF1/J	F	LL1-2	2016/05/02	25.7	Training	21	65936	773	3277	Training_599
B6129PF1/J	M	LL4-3	2016/04/28	25.6	Training	107	59341	1302	3278	Training_600
A/J	F	LL1-2	2016/04/06	20.4	Training	15	99068	799	3279	Training_601
C57BL/6NJ	F	LL2-3	2016/06/07	19.9	Training	54	155737	1158	3280	Training_602
CAF1/J	M	LL1-3	2016/04/07	26.2	Training	16	120574	1269	3281	Training_603
B6D2F1/J	F	LL5-3	2016/04/14	21.6	Validation	127	43426	659	3282	Validation_83
129P3/J	F	LL3-3	2016/04/12	18.6	Training	73	38642	1606	3283	Training_604
NZBWF1/J	F	LL1-4	2016/07/01	44	Training	24	44887	1453	3284	Training_605
NOR/LtJ	M	LL2-3	2016/04/18	27.8	Training	43	62116	594	3285	Training_606
C57BL/10SnJ	M	LL6-4	2016/04/06	29.7	Training	150	112986	734	3286	Training_607
MRL/MpJ	F	LL5-2	2016/04/18	32.5	Training	129	38518	718	3287	Training_608
C57BL/6J-Kit<W-v>/J	M	LL2-4	2016/02/29	25.7	Training	38	39517	714	3288	Training_609
FVB/NJ	F	LL5-4	2016/04/13	22	Training	126	100245	1640	3289	Training_610
CB6F1/J	M	LL4-4	2016/03/29	29.9	Training	102	58649	1657	3290	Training_611
CAF1/J	F	LL2-4	2016/05/02	22.6	Training	46	80452	2282	3291	Training_612
C3H/HeJ	M	LL4-2	2016/02/08	25.9	Training	97	96920	4308	3292	Training_613
CAF1/J	M	LL1-3	2016/04/07	26.2	Validation	16	105737	1338	3293	Validation_84
B6129PF1/J	M	LL5-3	2016/04/28	30.6	Training	131	45908	1571	3294	Training_614
AKR/J	M	LL3-2	2016/04/05	35.3	Training	70	54578	1009	3295	Training_615
WB/ReJ Kit<W>/J	M	LL2-1	2016/02/23	26.1	Training	37	85068	3610	3296	Training_616
129P3/J	M	LL1-3	2016/04/18	20.1	Training	18	75805	2557	3297	Training_617
BTBR T<+>ltpr3<tf>/J	M	LL2-4	2015/12/08	32	Training	33	94841	9578	3298	Training_618
BALB/cJ	M	LL4-4	2016/04/11	28.6	Training	105	77541	1936	3299	Training_619
C57BL/6J	M	LL4-2	2016/07/19	30.4	Training	113	43437	3444	3300	Training_620
MRL/MpJ	F	LL5-2	2016/04/18	32.5	Training	129	95936	2579	3301	Training_621
C57BL/6J	F	LL2-4	2016/09/13	25.5	Training	56	73995	3356	3302	Training_622
129P3/J	F	LL3-4	2016/04/12	20.6	Training	74	63502	1470	3303	Training_623
BTBR T<+>ltpr3<tf>/J	F	LL2-4	2016/04/13	26	Training	42	70307	880	3304	Training_624
SWR/J	F	LL2-2	2016/05/03	19.1	Training	47	74133	1641	3305	Training_625
CZECHII/EiJ	F	LL3-2	2017/01/04	13	Training	91	30860	2158	3306	Training_626
129P3/J	F	LL3-4	2016/04/12	20.6	Training	74	61436	1975	3307	Training_627
SM/J	M	LL3-2	2016/12/27	23	Training	88	95831	1197	3308	Training_628
BUB/BnJ	M	LL2-1	2016/12/27	31.8	Training	57	98095	834	3309	Training_629
CAST/EiJ	M	LL4-3	2016/01/19	16.2	Training	95	74549	1369	3310	Training_630
CAF1/J	F	LL2-4	2016/05/02	22.6	Training	46	109662	2596	3311	Training_631
CZECHII/EiJ	F	LL1-1	2017/01/12	12.2	Training	28	18316	4469	3312	Training_632
129X1/SvJ	M	LL2-4	2016/04/20	23.3	Training	44	36758	739	3313	Training_633
SM/J	M	LL3-2	2016/12/27	23	Validation	88	79795	1394	3314	Validation_85
129P3/J	M	LL1-3	2016/04/18	20.1	Training	18	74414	1117	3315	Training_634
KK.Cg-A<y>/J	F	LL3-3	2016/08/19	30.4	Training	85	44468	2328	3316	Training_635
AKR/J	F	LL3-4	2016/04/04	29.9	Training	69	45975	818	3317	Training_636
CBA/J	F	LL2-1	2016/05/10	20.2	Training	48	91466	1233	3318	Training_637
C57BLKS/J	M	LL2-2	2016/03/01	27.3	Training	39	95052	1087	3319	Training_638
C57BLKS/J	M	LL2-2	2016/03/01	27.3	Validation	39	92946	1831	3320	Validation_86
AKR/J	F	LL3-4	2016/04/04	29.9	Training	69	44401	1059	3321	Training_639
CZECHII/EiJ	F	LL3-4	2017/01/04	11	Training	92	17848	723	3322	Training_640
129P3/J	F	LL3-4	2016/04/12	20.6	Training	74	45006	1028	3323	Training_641
C3H/HeOuJ	F	LL3-3	2016/03/28	21	Validation	66	79242	1212	3324	Validation_87
MRL/MpJ	F	LL5-2	2016/04/18	32.5	Training	129	68401	2569	3325	Training_642
CBA/CaJ	F	LL6-2	2016/02/09	21.5	Training	143	37276	1816	3326	Training_643
AKR/J	M	LL3-2	2016/04/05	35.3	Training	70	69782	19891	3327	Training_644
B6D2F1/J	F	LL5-3	2016/04/14	21.6	Training	127	24407	1232	3328	Training_645
MRL/MpJ	F	LL4-2	2016/04/18	34.8	Training	106	5853	1283	3329	Training_646
WB/ReJ Kit<W>/J	F	LL1-3	2016/02/15	23.5	Training	8	26262	921	3330	Training_647
MRL/MpJ	F	LL5-2	2016/04/18	32.5	Training	129	67435	638	3331	Training_648
CBA/CaJ	F	LL5-1	2016/02/09	22.1	Validation	119	67111	1254	3332	Validation_88
A/J	M	LL1-1	2016/03/28	22.6	Training	13	66068	1645	3333	Training_649
B6129PF1/J	M	LL5-3	2016/04/28	30.6	Training	131	90981	2748	3334	Training_650
129X1/SvJ	M	LL2-4	2016/04/20	23.3	Training	44	67525	1297	3335	Training_651
WB/ReJ Kit<W>/J	F	LL1-3	2016/02/15	23.5	Training	8	104196	1984	3336	Training_652
SWR/J	F	LL3-2	2016/05/03	16.8	Validation	79	18114	1224	3337	Validation_89
B6.SJL-Ptprc<a> Pepc<b>/BoyJ	F	LL3-2	2016/01/11	22.6	Training	61	103422	1346	3338	Training_653
BALB/cJ	M	LL3-2	2016/04/11	27.6	Training	72	5713	1356	3339	Training_654
CBA/CaJ	M	LL3-1	2016/06/09	27.8	Training	82	32249	748	3340	Training_655
129X1/SvJ	M	LL2-4	2016/04/20	23.3	Training	44	61088	1814	3341	Training_656
C57BL/10SnJ	M	LL6-3	2016/04/06	31.9	Training	149	88843	975	3342	Training_657
CAF1/J	F	LL1-2	2016/05/02	25.7	Training	21	9071	730	3343	Training_658
CBA/J	F	LL2-1	2016/05/10	20.2	Training	48	74735	7931	3344	Training_659
TALLYHO/JngJ	F	LL4-2	2016/05/04	40.3	Training	109	120776	1932	3345	Training_660
BTBR T<+>ltpr3<tf>/J	M	LL2-4	2015/12/08	32	Training	33	60765	5493	3346	Training_661
PL/J	M	LL6-3	2016/02/15	25.6	Training	144	87939	2465	3347	Training_662
C57BL/10SnJ	M	LL6-3	2016/04/06	31.9	Training	149	157639	2273	3348	Training_663
AKR/J	F	LL3-4	2016/04/04	29.9	Training	69	86336	1557	3349	Training_664
C3H/HeOuJ	F	LL3-3	2016/03/28	21	Training	66	38716	821	3350	Training_665
TALLYHO/JngJ	F	LL4-2	2016/05/04	40.3	Training	109	118649	2090	3351	Training_666
C57BL/10SnJ	F	LL3-3	2016/04/06	23.9	Training	71	39505	1418	3352	Training_667
B6(CG)-Tyr<o-2J>/J	M	LL5-3	2016/05/20	25.2	Training	135	72242	1589	3353	Training_668
B6D2F1/J	F	LL5-3	2016/04/14	21.6	Training	127	49232	596	3354	Training_669
NZW/LacJ	M	LL3-1	2016/01/25	NA	Validation	64	60962	854	3355	Validation_90
NZB/BlNJ	F	LL1-2	2016/05/17	28.3	Training	23	5079	855	3356	Training_670
PL/J	M	LL6-3	2016/02/15	25.6	Training	144	43324	1925	3357	Training_671
B6AF1/J	M	LL1-4	2016/04/14	25.5	Training	17	97446	1503	3358	Training_672
C57BLKS/J	M	LL2-2	2016/03/01	27.3	Training	39	62796	1329	3359	Training_673
C3H/HeJ	M	LL4-2	2016/02/08	25.9	Training	97	73422	3118	3360	Training_674
CAF1/J	F	LL2-4	2016/05/02	22.6	Training	46	74688	3324	3361	Training_675
NZBWF1/J	F	LL1-4	2016/07/01	44	Training	24	8312	952	3362	Training_676
NOD/ShiLtJ	M	LL5-1	2016/04/13	20.6	Training	125	41918	1433	3363	Training_677
B6D2F1/J	F	LL5-3	2016/04/14	21.6	Training	127	84608	8126	3364	Training_678
LG/J	F	LL3-4	2016/12/28	31.5	Training	90	116520	1338	3365	Training_679
B6129SF1/J	M	LL4-3	2016/06/06	35.6	Training	111	76939	2786	3366	Training_680
B6(CG)-Tyr<o-2J>/J	M	LL5-3	2016/05/20	25.2	Validation	135	86018	1032	3367	Validation_91
B6129PF1/J	M	LL5-3	2016/04/28	30.6	Training	131	108819	819	3368	Training_681
129P3/J	F	LL3-3	2016/04/12	18.6	Training	73	17448	935	3369	Training_682
CZECHII/EiJ	F	LL3-4	2017/01/04	11	Training	92	37122	2454	3370	Training_683
TALLYHO/JngJ	F	LL3-3	2016/05/04	35.8	Training	80	102092	1200	3371	Training_684
CBA/J	F	LL2-4	2016/05/10	22.1	Training	49	21930	1257	3372	Training_685
BALB/cJ	M	LL3-2	2016/04/11	27.6	Training	72	102909	2836	3373	Training_686
C3HeB/FeJ	M	LL1-1	2016/01/12	24.5	Training	2	105164	748	3374	Training_687
CAF1/J	M	LL1-3	2016/04/07	26.2	Validation	16	24917	1040	3375	Validation_92
WB/ReJ Kit<W>/J	M	LL2-1	2016/02/23	26.1	Training	37	92968	1148	3376	Training_688
MA/MyJ	M	LL1-2	2017/01/24	21.4	Training	29	91267	1142	3377	Training_689
C57BLKS/J	F	LL1-3	2016/02/09	20.1	Training	7	29958	845	3378	Training_690
SWR/J	F	LL3-2	2016/05/03	16.8	Training	79	89165	1553	3379	Training_691
B6D2F1/J	F	LL5-4	2016/04/14	21.8	Training	128	46231	653	3380	Training_692
129X1/SvJ	M	LL2-4	2016/04/20	23.3	Training	44	54375	1833	3381	Training_693
C3H/HeOuJ	M	LL1-2	2016/03/22	27.8	Validation	11	40671	728	3382	Validation_93
BALB/cJ	M	LL3-2	2016/04/11	27.6	Training	72	10690	1101	3383	Training_694
CBA/CaJ	M	LL3-1	2016/06/09	27.8	Training	82	115005	1500	3384	Training_695
AKR/J	M	LL3-2	2016/04/05	35.3	Training	70	37255	4339	3385	Training_696
B6D2F1/J	F	LL5-3	2016/04/14	21.6	Validation	127	82484	659	3386	Validation_94
AKR/J	F	LL5-4	2016/04/04	25.1	Training	124	88092	889	3387	Training_697
CZECHII/EiJ	F	LL3-4	2017/01/04	11	Training	92	23835	735	3388	Training_698
PL/J	M	LL6-3	2016/02/15	25.6	Training	144	25883	870	3389	Training_699
C3H/HeJ	M	LL4-2	2016/02/08	25.9	Validation	97	92322	1629	3390	Validation_95
TALLYHO/JngJ	F	LL1-3	2016/04/29	36.5	Training	20	113116	6785	3391	Training_700
NZB/BlNJ	F	LL2-4	2016/05/17	22.9	Training	53	22070	2780	3392	Training_701
NOD/ShiLtJ	F	LL5-2	2016/05/26	19.9	Validation	136	119377	759	3393	Validation_96
CBA/CaJ	F	LL6-2	2016/02/09	21.5	Training	143	72165	733	3394	Training_702
TALLYHO/JngJ	F	LL3-3	2016/05/04	35.8	Training	80	115047	1188	3395	Training_703
129S1/SvlmJ	M	LL2-2	2016/05/11	23.3	Training	50	46604	3411	3396	Training_704
PL/J	M	LL4-3	2016/02/15	27.1	Training	98	9340	658	3397	Training_705
C57BLKS/J	F	LL1-2	2016/02/09	21.1	Training	6	28671	814	3544	Training_706
BUB/BnJ	M	LL2-1	2016/12/27	31.8	Validation	57	76221	807	3545	Validation_97
NZBWF1/J	F	LL2-2	2016/07/01	38.6	Training	55	13133	578	3644	Training_707
KK/HiJ	M	LL6-2	2016/12/27	31.1	Training	155	46100	732	3645	Training_708
C57BL/6J-Kit<W-v>/J	F	LL5-4	2016/03/01	23.2	Training	123	43998	661	3646	Training_709
A/J	M	LL1-1	2016/03/28	22.6	Training	13	48766	772	3647	Training_710
C3H/HeOuJ	M	LL1-2	2016/03/22	27.8	Training	11	107141	902	3648	Training_711
129P3/J	M	LL1-3	2016/04/18	20.1	Training	18	92537	4078	3649	Training_712
C3HeB/FeJ	M	LL1-2	2016/01/12	25.5	Validation	3	93359	994	3650	Validation_98
MA/MyJ	M	LL4-2	2017/01/12	23.6	Training	115	93346	591	3651	Training_713
129S1/SvlmJ	M	LL2-3	2016/05/11	22.6	Training	51	19222	825	3652	Training_714
MA/MyJ	M	LL1-2	2017/01/24	21.4	Training	29	63377	652	3653	Training_715
B6129SF1/J	M	LL4-3	2016/06/06	35.6	Training	111	20460	2044	3654	Training_716
129P3/J	F	LL3-3	2016/04/12	18.6	Training	73	99792	1290	3655	Training_717
KK.Cg-A<y>/J	F	LL3-4	2016/08/19	26.9	Training	86	57591	1252	3656	Training_718
FVB/NJ	F	LL5-4	2016/04/13	22	Training	126	112508	967	3657	Training_719
C3H/HeJ	F	LL1-1	2015/12/22	20	Training	1	102659	5351	3658	Training_720
SWR/J	F	LL3-2	2016/05/03	16.8	Training	79	16220	1257	3659	Training_721
CZECHII/EiJ	F	LL3-2	2017/01/04	13	Training	91	11710	1606	3660	Training_722
MA/MyJ	M	LL4-2	2017/01/12	23.6	Training	115	32994	1339	3661	Training_723
CBA/J	F	LL3-1	2016/05/10	19.4	Validation	81	34808	2066	3662	Validation_99
129P3/J	F	LL3-4	2016/04/12	20.6	Training	74	66399	1492	3663	Training_724
C3H/HeOuJ	M	LL1-1	2016/03/22	25.3	Training	10	113557	797	3664	Training_725
TALLYHO/JngJ	F	LL1-3	2016/04/29	36.5	Training	20	32600	2771	3665	Training_726
129S1/SvlmJ	M	LL2-2	2016/05/11	23.3	Training	50	99096	1798	3666	Training_727
NON/ShiLtJ	F	LL3-2	2016/04/04	28.9	Training	68	102121	3045	3667	Training_728
NZBWF1/J	M	LL5-2	2016/05/17	37.1	Validation	132	101445	1363	3668	Validation_100
BUB/BnJ	F	LL3-2	2016/12/28	23.6	Training	89	50252	3610	3669	Training_729
KK.Cg-A<y>/J	F	LL3-3	2016/08/19	30.4	Training	85	13898	997	3670	Training_730
BALB/cJ	M	LL3-2	2016/04/11	27.6	Training	72	36703	2273	3671	Training_731
C3H/HeOuJ	M	LL1-2	2016/03/22	27.8	Training	11	80461	1097	3672	Training_732
CAF1/J	M	LL1-3	2016/04/07	26.2	Training	16	37786	938	3673	Training_733
C57BLKS/J	F	LL1-3	2016/02/09	20.1	Training	7	61708	1068	3674	Training_734
BALB/cByJ	M	LL5-1	2016/02/16	29.2	Validation	121	35290	598	3675	Validation_101
CB6F1/J	M	LL4-4	2016/03/29	29.9	Training	102	116363	1352	3676	Training_735
C57BLKS/J	M	LL2-2	2016/03/01	27.3	Training	39	12367	616	3677	Training_736
KK.Cg-A<y>/J	F	LL3-3	2016/08/19	30.4	Validation	85	95869	2585	3678	Validation_102
CAF1/J	F	LL1-2	2016/05/02	25.7	Training	21	17972	2151	3679	Training_737
CBA/CaJ	M	LL3-1	2016/06/09	27.8	Training	82	60382	1247	3680	Training_738
KK/HiJ	F	LL4-2	2017/01/04	32.5	Training	114	108102	3717	3681	Training_739
B6129SF1/J	M	LL5-4	2016/06/06	38	Training	137	37618	967	3682	Training_740
AKR/J	M	LL3-2	2016/04/05	35.3	Training	70	11016	612	3683	Training_741
CBA/CaJ	F	LL6-2	2016/02/09	21.5	Training	143	73025	706	3684	Training_742
NOR/LtJ	F	LL2-1	2016/02/16	20.4	Training	36	30013	901	3685	Training_743
C57BL/6NJ	M	LL4-4	2015/12/08	27.8	Training	94	85901	1090	3686	Training_744
NON/ShiLtJ	F	LL2-4	2016/04/04	28.7	Training	41	63981	1090	3687	Training_745
CAST/EiJ	F	LL6-2	2016/03/30	12.6	Training	146	48804	1014	3688	Training_746
CAF1/J	F	LL2-4	2016/05/02	22.6	Training	46	16859	1391	3689	Training_747
C57BLKS/J	F	LL1-3	2016/02/09	20.1	Training	7	57342	907	3690	Training_748
BALB/cByJ	M	LL5-3	2016/02/16	28	Training	122	101350	1937	3691	Training_749
B6CBAF1/J	M	LL2-4	2016/04/29	30.5	Training	45	50681	725	3692	Training_750
SWR/J	F	LL2-2	2016/05/03	19.1	Training	47	65531	1412	3693	Training_751
B6D2F1/J	F	LL5-4	2016/04/14	21.8	Training	128	49202	1002	3694	Training_752
BUB/BnJ	M	LL2-1	2016/12/27	31.8	Validation	57	90929	920	3695	Validation_103
B6C3F1/J	M	LL1-4	2016/04/28	31	Validation	19	81043	693	3696	Validation_104
SWR/J	F	LL2-2	2016/05/03	19.1	Validation	47	84208	936	3697	Validation_105
129S1/SvlmJ	M	LL2-2	2016/05/11	23.3	Validation	50	106982	3138	3698	Validation_106
NOD/ShiLtJ	F	LL5-2	2016/05/26	19.9	Validation	136	71715	641	3699	Validation_107
C57BL/10SnJ	M	LL6-4	2016/04/06	29.7	Validation	150	128897	4017	3700	Validation_108
B6(CG)-Tyr<o-2J>/J	M	LL6-1	2016/05/20	25	Training	153	15961	1028	3701	Training_753
BTBR T<+>ltpr3<tf>/J	M	LL2-4	2015/12/08	32	Training	33	27023	3864	3702	Training_754
MA/MyJ	M	LL1-4	2017/01/24	33.5	Training	30	104812	6349	3703	Training_755
B6CBAF1/J	F	LL4-3	2016/05/03	20.9	Training	108	75504	673	3704	Training_756
129P3/J	F	LL3-4	2016/04/12	20.6	Training	74	26147	1251	3705	Training_757
CBA/J	F	LL3-1	2016/05/10	19.4	Training	81	23010	1999	3706	Training_758
MA/MyJ	M	LL1-4	2017/01/24	33.5	Training	30	55877	933	3707	Training_759
CBA/CaJ	F	LL5-1	2016/02/09	22.1	Training	119	74843	1759	3708	Training_760
NZW/LacJ	M	LL3-1	2016/01/25	NA	Training	64	65035	1492	3709	Training_761
129S1/SvlmJ	M	LL2-4	2016/05/11	23.6	Training	52	42509	1482	3710	Training_762
RIIIS/J	F	LL5-1	2017/01/24	16.7	Training	141	54704	1327	3711	Training_763
C57BL/6J	F	LL5-3	2016/02/01	18.8	Training	118	72477	1184	3712	Training_764
NOR/LtJ	F	LL5-4	2016/04/18	20.8	Training	130	100683	4934	3713	Training_765
C57BLKS/J	F	LL1-2	2016/02/09	21.1	Training	6	59890	1478	3714	Training_766
NON/ShiLtJ	M	LL3-1	2016/04/13	28	Training	75	104495	1141	3715	Training_767
BTBR T<+>ltpr3<tf>/J	M	LL2-2	2015/12/08	35.7	Training	32	52193	3513	3716	Training_768
LG/J	F	LL3-4	2016/12/28	31.5	Training	90	102352	9828	3717	Training_769
CBA/J	F	LL3-1	2016/05/10	19.4	Validation	81	78011	936	3718	Validation_109
129P3/J	F	LL3-3	2016/04/12	18.6	Training	73	74913	4869	3719	Training_770
B6CBAF1/J	M	LL2-4	2016/04/29	30.5	Validation	45	54834	1725	3720	Validation_110
MRL/MpJ	F	LL3-2	2016/04/18	32.2	Training	76	58209	1549	3721	Training_771
C3H/HeJ	F	LL6-1	2016/02/08	19.9	Training	142	77751	1526	3722	Training_772
CAF1/J	M	LL1-3	2016/04/07	26.2	Training	16	76290	1675	3723	Training_773
C3HeB/FeJ	F	LL3-2	2016/01/12	24.1	Training	63	66840	930	3724	Training_774
BUB/BnJ	M	LL2-4	2016/12/27	30.2	Validation	58	57868	1191	3725	Validation_111
C57BL/6NJ	M	LL4-4	2015/12/08	27.8	Training	94	44446	702	3726	Training_775
NZW/LacJ	M	LL3-1	2016/01/25	NA	Training	64	55925	1338	3727	Training_776
CAST/EiJ	F	LL6-2	2016/03/30	12.6	Training	146	113656	1115	3728	Training_777
PL/J	M	LL6-3	2016/02/15	25.6	Training	144	38213	2360	3729	Training_778
C3HeB/FeJ	F	LL3-2	2016/01/12	24.1	Training	63	73746	939	3730	Training_779
MA/MyJ	M	LL1-4	2017/01/24	33.5	Training	30	25758	858	3731	Training_780
CBA/J	F	LL2-1	2016/05/10	20.2	Training	48	7980	634	3732	Training_781
BALB/cJ	M	LL4-1	2016/04/11	31.2	Validation	104	108130	894	3733	Validation_112
B6129SF1/J	M	LL4-3	2016/06/06	35.6	Training	111	84977	3302	3734	Training_782
MA/MyJ	M	LL1-2	2017/01/24	21.4	Training	29	38887	803	3735	Training_783
NZBWF1/J	F	LL2-2	2016/07/01	38.6	Training	55	81723	1663	3736	Training_784
LG/J	F	LL3-4	2016/12/28	31.5	Training	90	57739	814	3737	Training_785
C57BL/6J-Kit<W-v>/J	M	LL2-4	2016/02/29	25.7	Training	38	38846	610	3738	Training_786
WBB6F1/J-Kit<W>/Kit<W-v>/J	M	LL1-2	2016/03/23	25.3	Training	12	46621	685	3739	Training_787
BTBR T<+>ltpr3<tf>/J	M	LL2-2	2015/12/08	35.7	Validation	32	80112	4327	3740	Validation_113
NOR/LtJ	F	LL5-4	2016/04/18	20.8	Training	130	35445	1052	3741	Training_788
CBA/CaJ	F	LL6-2	2016/02/09	21.5	Training	143	107424	581	3742	Training_789
SWR/J	F	LL3-2	2016/05/03	16.8	Training	79	113381	2780	3743	Training_790
KK.Cg-A<y>/J	F	LL3-4	2016/08/19	26.9	Training	86	100731	1132	3744	Training_791
TALLYHO/JngJ	F	LL1-3	2016/04/29	36.5	Training	20	54665	6560	3745	Training_792
CBA/CaJ	F	LL5-1	2016/02/09	22.1	Validation	119	44534	1009	3746	Validation_114
BALB/cByJ	M	LL5-3	2016/02/16	28	Training	122	62750	1810	3747	Training_793
B6C3F1/J	M	LL1-4	2016/04/28	31	Training	19	118561	1126	3748	Training_794
RIIIS/J	F	LL5-1	2017/01/24	16.7	Validation	141	108293	10463	3749	Validation_115
WB/ReJ Kit<W>/J	F	LL5-4	2016/01/26	22	Training	117	74528	668	3750	Training_795
CAF1/J	M	LL1-3	2016/04/07	26.2	Training	16	38812	1588	3751	Training_796
B6129SF1/J	M	LL5-4	2016/06/06	38	Training	137	59721	6451	3752	Training_797
TALLYHO/JngJ	F	LL1-3	2016/04/29	36.5	Training	20	2102	925	3753	Training_798
C57BL/6NJ	M	LL4-4	2015/12/08	27.8	Training	94	101947	941	3754	Training_799
MA/MyJ	M	LL1-2	2017/01/24	21.4	Training	29	102316	1115	3755	Training_800
B6129SF1/J	M	LL4-3	2016/06/06	35.6	Validation	111	15883	2380	3756	Validation_116
129P3/J	F	LL3-3	2016/04/12	18.6	Training	73	36604	1529	3757	Training_801
CB6F1/J	M	LL4-4	2016/03/29	29.9	Training	102	121728	870	3758	Training_802
PL/J	M	LL6-3	2016/02/15	25.6	Training	144	99964	1499	3759	Training_803
C57BL/6J-Kit<W-v>/J	M	LL2-4	2016/02/29	25.7	Training	38	24819	827	3760	Training_804
129X1/SvJ	M	LL2-4	2016/04/20	23.3	Training	44	114803	1303	3761	Training_805
C57BL/6J	M	LL4-2	2016/07/19	30.4	Training	113	30844	3911	3762	Training_806
MA/MyJ	M	LL1-2	2017/01/24	21.4	Training	29	82856	1908	3763	Training_807
CBA/J	F	LL2-4	2016/05/10	22.1	Training	49	34796	2534	3764	Training_808
MRL/MpJ	F	LL4-2	2016/04/18	34.8	Training	106	69219	1215	3765	Training_809
C57BL/6J-Kit<W-v>/J	M	LL2-4	2016/02/29	25.7	Training	38	82313	4597	3766	Training_810
TALLYHO/JngJ	F	LL4-2	2016/05/04	40.3	Training	109	5683	4292	3767	Training_811
B6129SF1/J	M	LL4-3	2016/06/06	35.6	Training	111	29539	1361	3768	Training_812
A/J	M	LL1-1	2016/03/28	22.6	Training	13	86084	2564	3769	Training_813
B6D2F1/J	F	LL5-4	2016/04/14	21.8	Validation	128	98225	948	3770	Validation_117
129P3/J	M	LL1-3	2016/04/18	20.1	Training	18	22988	613	3771	Training_814
C57BL/6NJ	M	LL4-4	2015/12/08	27.8	Training	94	18642	1131	3772	Training_815
CAF1/J	M	LL1-3	2016/04/07	26.2	Training	16	74891	1021	3773	Training_816
B6129PF1/J	M	LL5-3	2016/04/28	30.6	Training	131	80697	1595	3774	Training_817
LG/J	F	LL3-4	2016/12/28	31.5	Training	90	112427	1376	3775	Training_818
C57BL/10SnJ	F	LL3-3	2016/04/06	23.9	Training	71	76205	989	3776	Training_819
AKR/J	F	LL3-4	2016/04/04	29.9	Training	69	34342	889	3777	Training_820
NZBWF1/J	F	LL1-4	2016/07/01	44	Validation	24	15275	1126	3778	Validation_118
MA/MyJ	M	LL4-2	2017/01/12	23.6	Training	115	77427	1503	3779	Training_821
C3H/HeOuJ	M	LL1-2	2016/03/22	27.8	Training	11	63140	1034	3780	Training_822
BUB/BnJ	M	LL2-1	2016/12/27	31.8	Training	57	103205	931	3781	Training_823
B6129PF1/J	M	LL5-3	2016/04/28	30.6	Training	131	18894	640	3782	Training_824
AKR/J	F	LL5-4	2016/04/04	25.1	Training	124	77655	1219	3783	Training_825
WB/ReJ Kit<W>/J	F	LL1-3	2016/02/15	23.5	Training	8	102327	1145	3784	Training_826
SWR/J	F	LL2-2	2016/05/03	19.1	Training	47	12986	820	3785	Training_827
CB6F1/J	M	LL1-4	2016/03/15	28.7	Training	9	94402	897	3786	Training_828
CAF1/J	F	LL2-4	2016/05/02	22.6	Training	46	112847	5010	3787	Training_829
C57BLKS/J	M	LL2-2	2016/03/01	27.3	Training	39	96964	968	3788	Training_830
B6(CG)-Tyr<o-2J>/J	M	LL5-3	2016/05/20	25.2	Training	135	97047	1462	3789	Training_831
NZBWF1/J	M	LL5-2	2016/05/17	37.1	Training	132	9745	954	3790	Training_832
BALB/cByJ	M	LL5-1	2016/02/16	29.2	Validation	121	92323	1383	3791	Validation_119
B6AF1/J	M	LL2-1	2016/03/07	28.2	Training	40	73518	2324	3792	Training_833
BALB/cByJ	M	LL5-1	2016/02/16	29.2	Training	121	91227	866	3793	Training_834
C57BLKS/J	M	LL2-2	2016/03/01	27.3	Training	39	79325	902	3844	Training_835
SWR/J	F	LL3-2	2016/05/03	16.8	Validation	79	28489	1042	3845	Validation_120
CBA/J	F	LL3-1	2016/05/10	19.4	Training	81	10739	1154	3846	Training_836
TALLYHO/JngJ	F	LL4-2	2016/05/04	40.3	Validation	109	57689	1217	3847	Validation_121
129S1/SvlmJ	M	LL2-4	2016/05/11	23.6	Training	52	24000	849	3848	Training_837
MA/MyJ	M	LL1-2	2017/01/24	21.4	Training	29	32834	657	3849	Training_838
129S1/SvlmJ	M	LL2-3	2016/05/11	22.6	Training	51	20967	733	3850	Training_839
NZW/LacJ	M	LL3-1	2016/01/25	NA	Training	64	68450	859	3851	Training_840
CBA/J	F	LL3-1	2016/05/10	19.4	Training	81	67540	958	3852	Training_841
MA/MyJ	M	LL1-4	2017/01/24	33.5	Validation	30	64969	1337	3853	Validation_122
B6CBAF1/J	F	LL4-3	2016/05/03	20.9	Training	108	90208	1343	3854	Training_842
NOR/LtJ	F	LL2-1	2016/02/16	20.4	Training	36	18891	663	3855	Training_843
C57BL/6NJ	M	LL4-4	2015/12/08	27.8	Training	94	41102	657	3856	Training_844
A/J	F	LL1-2	2016/04/06	20.4	Training	15	51120	7041	3857	Training_845
NZB/BlNJ	F	LL1-2	2016/05/17	28.3	Training	23	110820	1060	3858	Training_846
LG/J	F	LL3-4	2016/12/28	31.5	Training	90	114493	1716	3859	Training_847
B6CBAF1/J	M	LL2-4	2016/04/29	30.5	Training	45	82359	2120	3860	Training_848
CAF1/J	M	LL1-3	2016/04/07	26.2	Training	16	30963	780	3861	Training_849
C3HeB/FeJ	F	LL3-2	2016/01/12	24.1	Training	63	90000	3408	3862	Training_850
SWR/J	F	LL3-2	2016/05/03	16.8	Training	79	11882	1307	3863	Training_851
B6AF1/J	M	LL1-4	2016/04/14	25.5	Training	17	60915	1150	3864	Training_852
BALB/cByJ	M	LL5-1	2016/02/16	29.2	Training	121	98490	1847	3865	Training_853
B6AF1/J	M	LL2-1	2016/03/07	28.2	Training	40	23487	670	3866	Training_854
NON/ShiLtJ	F	LL3-2	2016/04/04	28.9	Training	68	119803	612	3867	Training_855
C57BL/6J	F	LL5-3	2016/02/01	18.8	Training	118	38870	1214	3868	Training_856
BUB/BnJ	F	LL3-2	2016/12/28	23.6	Validation	89	3407	1986	3869	Validation_123
CBA/J	F	LL2-4	2016/05/10	22.1	Training	49	5765	1035	3870	Training_857
MRL/MpJ	F	LL4-2	2016/04/18	34.8	Validation	106	103754	6648	3871	Validation_124
KK.Cg-A<y>/J	F	LL3-2	2016/08/19	34.9	Training	84	38031	3361	3872	Training_858
NOR/LtJ	M	LL2-3	2016/04/18	27.8	Training	43	62824	3704	3873	Training_859
CB6F1/J	M	LL4-4	2016/03/29	29.9	Training	102	89814	819	3874	Training_860
PL/J	M	LL6-3	2016/02/15	25.6	Training	144	72477	8547	3875	Training_861
C57BL/6J	F	LL2-4	2016/09/13	25.5	Validation	56	47508	1581	3876	Validation_125
BUB/BnJ	M	LL2-1	2016/12/27	31.8	Training	57	91970	1327	3877	Training_862
C57BL/10SnJ	F	LL3-3	2016/04/06	23.9	Training	71	80246	883	3878	Training_863
TALLYHO/JngJ	F	LL3-3	2016/05/04	35.8	Training	80	104596	5120	3879	Training_864
B6AF1/J	M	LL1-4	2016/04/14	25.5	Training	17	71716	890	3880	Training_865
NON/ShiLtJ	F	LL3-2	2016/04/04	28.9	Validation	68	75126	1414	3881	Validation_126
B6129PF1/J	M	LL5-3	2016/04/28	30.6	Training	131	39716	1255	3882	Training_866
BALB/cJ	M	LL4-4	2016/04/11	28.6	Training	105	43932	2190	3883	Training_867
CBA/CaJ	M	LL3-1	2016/06/09	27.8	Training	82	80356	2736	3884	Training_868
AKR/J	F	LL5-4	2016/04/04	25.1	Training	124	82137	1218	3885	Training_869
CBA/CaJ	F	LL5-1	2016/02/09	22.1	Training	119	64083	817	3886	Training_870
CAF1/J	F	LL2-4	2016/05/02	22.6	Training	46	13678	1169	3887	Training_871
C3H/HeJ	F	LL6-1	2016/02/08	19.9	Training	142	73564	761	3888	Training_872
SWR/J	F	LL2-2	2016/05/03	19.1	Training	47	54246	2774	3889	Training_873
SM/J	M	LL3-2	2016/12/27	23	Training	88	100260	1334	3890	Training_874
BUB/BnJ	M	LL2-4	2016/12/27	30.2	Training	58	107727	1388	3891	Training_875
C57BLKS/J	M	LL2-2	2016/03/01	27.3	Training	39	95052	1087	3892	Training_876
BALB/cByJ	M	LL5-3	2016/02/16	28	Training	122	36499	2172	3893	Training_877
NZBWF1/J	M	LL5-2	2016/05/17	37.1	Training	132	40950	9450	3894	Training_878
BALB/cJ	M	LL4-1	2016/04/11	31.2	Training	104	51571	1244	3895	Training_879
C57BL/6NJ	M	LL4-4	2015/12/08	27.8	Training	94	53939	782	3896	Training_880
NOR/LtJ	F	LL2-1	2016/02/16	20.4	Training	36	54851	1477	3897	Training_881
C3H/HeJ	F	LL6-1	2016/02/08	19.9	Training	142	35840	731	3898	Training_882
129P3/J	F	LL3-4	2016/04/12	20.6	Training	74	43084	1114	3899	Training_883
CBA/CaJ	F	LL6-2	2016/02/09	21.5	Training	143	52185	1276	3900	Training_884
129P3/J	F	LL3-3	2016/04/12	18.6	Training	73	60417	652	3901	Training_885
NZB/BlNJ	F	LL2-4	2016/05/17	22.9	Training	53	14136	1262	3902	Training_886
TALLYHO/JngJ	F	LL4-2	2016/05/04	40.3	Validation	109	47871	1587	3903	Validation_127
B6CBAF1/J	M	LL2-4	2016/04/29	30.5	Training	45	99960	1271	3904	Training_887
CAF1/J	F	LL1-2	2016/05/02	25.7	Training	21	103418	1452	3905	Training_888
C3H/HeOuJ	F	LL3-3	2016/03/28	21	Training	66	114232	724	3906	Training_889
CAF1/J	M	LL1-3	2016/04/07	26.2	Training	16	68700	1730	3907	Training_890
CBA/CaJ	F	LL5-1	2016/02/09	22.1	Validation	119	57875	1675	3908	Validation_128
TALLYHO/JngJ	F	LL1-3	2016/04/29	36.5	Training	20	40796	1191	3909	Training_891
C57BL/6J-Kit<W-v>/J	F	LL6-1	2016/03/01	19.6	Training	145	94808	1026	3910	Training_892
BUB/BnJ	F	LL3-2	2016/12/28	23.6	Training	89	81375	3286	3911	Training_893
CZECHII/EiJ	F	LL1-1	2017/01/12	12.2	Training	28	80921	11650	3912	Training_894
AKR/J	F	LL5-4	2016/04/04	25.1	Training	124	36484	571	3913	Training_895
NZBWF1/J	F	LL1-4	2016/07/01	44	Training	24	35834	6234	3914	Training_896
SWR/J	F	LL3-2	2016/05/03	16.8	Training	79	101781	1028	3915	Training_897
129S1/SvlmJ	M	LL2-3	2016/05/11	22.6	Training	51	46958	1860	3916	Training_898
BALB/cJ	M	LL4-4	2016/04/11	28.6	Training	105	61028	1924	3917	Training_899
CB6F1/J	M	LL3-4	2016/03/29	30.4	Training	67	91532	904	3918	Training_900
MA/MyJ	M	LL1-2	2017/01/24	21.4	Training	29	73985	683	3919	Training_901
B6129PF1/J	M	LL4-3	2016/04/28	25.6	Training	107	117311	1978	3920	Training_902
129P3/J	F	LL3-3	2016/04/12	18.6	Training	73	54257	1949	3921	Training_903
B6129PF1/J	M	LL5-3	2016/04/28	30.6	Training	131	54880	918	3922	Training_904
BALB/cByJ	M	LL5-1	2016/02/16	29.2	Training	121	94973	1369	3923	Training_905
129S1/SvlmJ	M	LL2-3	2016/05/11	22.6	Training	51	63573	2687	3924	Training_906
MRL/MpJ	F	LL4-2	2016/04/18	34.8	Training	106	48989	2647	3925	Training_907
CB6F1/J	M	LL1-4	2016/03/15	28.7	Training	9	27523	717	3926	Training_908
PL/J	F	LL5-2	2016/02/15	18.1	Training	120	69449	4317	3927	Training_909
C57BL/10SnJ	M	LL6-3	2016/04/06	31.9	Training	149	35658	947	3928	Training_910
PL/J	M	LL4-3	2016/02/15	27.1	Training	98	84807	1392	3929	Training_911
C57BLKS/J	M	LL2-2	2016/03/01	27.3	Validation	39	28844	1104	3930	Validation_129
FVB/NJ	F	LL5-4	2016/04/13	22	Training	126	46056	660	3931	Training_912
C3H/HeOuJ	M	LL1-1	2016/03/22	25.3	Training	10	114698	1641	3932	Training_913
SWR/J	F	LL2-2	2016/05/03	19.1	Training	47	68568	1346	3933	Training_914
C57BLKS/J	M	LL2-2	2016/03/01	27.3	Training	39	39290	1339	3934	Training_915
A/J	F	LL1-1	2016/04/06	19.5	Training	14	40645	1159	3935	Training_916
KK.Cg-A<y>/J	F	LL3-2	2016/08/19	34.9	Training	84	113237	6281	3936	Training_917
BALB/cByJ	M	LL5-3	2016/02/16	28	Training	122	90378	2618	3937	Training_918
C57BLKS/J	M	LL2-2	2016/03/01	27.3	Training	39	101909	1106	3938	Training_919
BUB/BnJ	F	LL3-2	2016/12/28	23.6	Training	89	61972	1076	3939	Training_920
KK.Cg-A<y>/J	F	LL3-4	2016/08/19	26.9	Training	86	80839	1087	3940	Training_921
A/J	M	LL1-1	2016/03/28	22.6	Training	13	64164	801	3941	Training_922
B6AF1/J	M	LL2-1	2016/03/07	28.2	Training	40	71988	1395	3942	Training_923
A/J	M	LL1-1	2016/03/28	22.6	Validation	13	36367	1199	3943	Validation_130
CBA/J	F	LL3-1	2016/05/10	19.4	Training	81	79106	1708	3944	Training_924
KK/HiJ	F	LL4-2	2017/01/04	32.5	Training	114	3172	911	3945	Training_925
129S1/SvlmJ	M	LL2-4	2016/05/11	23.6	Training	52	31421	750	3946	Training_926
CAF1/J	F	LL1-2	2016/05/02	25.7	Training	21	53960	937	3947	Training_927
NZB/BlNJ	M	LL3-3	2016/02/01	23.5	Training	65	75045	3750	3948	Training_928
129X1/SvJ	M	LL2-4	2016/04/20	23.3	Training	44	116854	964	3949	Training_929
B6129SF1/J	M	LL5-4	2016/06/06	38	Training	137	90121	6274	3950	Training_930
SWR/J	F	LL3-2	2016/05/03	16.8	Validation	79	74318	754	3951	Validation_131
B6AF1/J	M	LL1-4	2016/04/14	25.5	Validation	17	103183	14466	3952	Validation_132
TALLYHO/JngJ	F	LL4-2	2016/05/04	40.3	Training	109	99648	2686	3953	Training_931
B6CBAF1/J	M	LL2-4	2016/04/29	30.5	Training	45	108451	3813	3954	Training_932
PL/J	F	LL5-2	2016/02/15	18.1	Training	120	59438	1442	3955	Training_933
CBA/CaJ	M	LL3-1	2016/06/09	27.8	Training	82	110231	4194	3956	Training_934
MRL/MpJ	F	LL3-2	2016/04/18	32.2	Training	76	112566	1647	3957	Training_935
CB6F1/J	M	LL1-4	2016/03/15	28.7	Training	9	51320	604	3958	Training_936
TALLYHO/JngJ	F	LL3-3	2016/05/04	35.8	Training	80	60089	3459	3959	Training_937
C57BL/6J	F	LL2-4	2016/09/13	25.5	Training	56	110375	1256	3960	Training_938
SWR/J	F	LL3-2	2016/05/03	16.8	Training	79	92619	3379	3961	Training_939
C57BL/10SnJ	M	LL6-3	2016/04/06	31.9	Training	149	141335	7313	3962	Training_940
129X1/SvJ	M	LL2-4	2016/04/20	23.3	Training	44	77669	1139	3963	Training_941
C3H/HeOuJ	F	LL3-3	2016/03/28	21	Validation	66	120405	2268	3964	Validation_133
A/J	F	LL1-2	2016/04/06	20.4	Training	15	13362	782	3965	Training_942
B6CBAF1/J	F	LL4-3	2016/05/03	20.9	Training	108	96691	750	3966	Training_943
NOR/LtJ	F	LL2-1	2016/02/16	20.4	Training	36	64410	1308	3967	Training_944
NZB/BlNJ	F	LL1-2	2016/05/17	28.3	Training	23	11333	2015	3968	Training_945
MA/MyJ	M	LL1-4	2017/01/24	33.5	Training	30	71375	1592	3969	Training_946
CZECHII/EiJ	F	LL3-4	2017/01/04	11	Training	92	100157	1866	3970	Training_947
NON/ShiLtJ	F	LL2-4	2016/04/04	28.7	Training	41	81661	5212	3971	Training_948
NZBWF1/J	M	LL5-2	2016/05/17	37.1	Training	132	30654	3037	3972	Training_949
A/J	F	LL1-2	2016/04/06	20.4	Training	15	45018	1956	3973	Training_950
C3H/HeJ	F	LL1-1	2015/12/22	20	Validation	1	85337	1388	3974	Validation_134
129P3/J	F	LL3-4	2016/04/12	20.6	Training	74	13084	835	3975	Training_951
B6C3F1/J	M	LL1-4	2016/04/28	31	Training	19	40967	639	3976	Training_952
TALLYHO/JngJ	F	LL4-2	2016/05/04	40.3	Training	109	76072	18587	3977	Training_953
B6129PF1/J	M	LL4-3	2016/04/28	25.6	Training	107	50815	974	3978	Training_954
TALLYHO/JngJ	F	LL3-3	2016/05/04	35.8	Training	80	18163	903	3979	Training_955
CZECHII/EiJ	F	LL3-2	2017/01/04	13	Validation	91	99131	3170	3980	Validation_135
NON/ShiLtJ	F	LL2-4	2016/04/04	28.7	Validation	41	103724	6088	3981	Validation_136
B6CBAF1/J	M	LL3-3	2016/04/29	31.5	Training	78	40637	749	3982	Training_956
TALLYHO/JngJ	F	LL3-3	2016/05/04	35.8	Training	80	20623	1299	3983	Training_957
C3HeB/FeJ	M	LL1-1	2016/01/12	24.5	Training	2	74107	751	3984	Training_958
MA/MyJ	M	LL4-2	2017/01/12	23.6	Training	115	87564	959	3985	Training_959
CBA/CaJ	F	LL6-2	2016/02/09	21.5	Training	143	63912	2713	3986	Training_960
B6(CG)-Tyr<o-2J>/J	M	LL5-1	2016/05/20	26.2	Validation	134	84498	2199	3987	Validation_137
B6AF1/J	F	LL4-3	2016/03/07	19	Training	99	100141	860	3988	Training_961
MRL/MpJ	F	LL3-2	2016/04/18	32.2	Training	76	118471	3672	3989	Training_962
B6CBAF1/J	M	LL3-3	2016/04/29	31.5	Training	78	118526	2707	3990	Training_963
KK/HiJ	M	LL6-2	2016/12/27	31.1	Training	155	9389	998	3991	Training_964
C3HeB/FeJ	F	LL3-2	2016/01/12	24.1	Validation	63	70008	1276	3992	Validation_138
FVB/NJ	F	LL5-4	2016/04/13	22	Training	126	103903	3125	3993	Training_965
KK.Cg-A<y>/J	F	LL3-4	2016/08/19	26.9	Validation	86	94742	2883	3994	Validation_139
A/J	F	LL1-2	2016/04/06	20.4	Training	15	102871	4585	3995	Training_966
B6AF1/J	M	LL2-1	2016/03/07	28.2	Training	40	14779	574	3996	Training_967
BALB/cJ	M	LL4-4	2016/04/11	28.6	Training	105	11342	1287	3997	Training_968
129S1/SvlmJ	M	LL2-3	2016/05/11	22.6	Training	51	50156	4092	3998	Training_969
NON/ShiLtJ	M	LL3-1	2016/04/13	28	Training	75	57242	748	3999	Training_970
C3H/HeOuJ	F	LL3-3	2016/03/28	21	Training	66	114994	3270	4000	Training_971
MRL/MpJ	F	LL4-2	2016/04/18	34.8	Training	106	55969	1087	4001	Training_972
129S1/SvlmJ	M	LL2-2	2016/05/11	23.3	Training	50	19501	791	4002	Training_973
BALB/cByJ	M	LL5-3	2016/02/16	28	Training	122	104673	1984	4003	Training_974
NZB/BlNJ	F	LL2-4	2016/05/17	22.9	Training	53	46459	4591	4004	Training_975
TALLYHO/JngJ	F	LL4-2	2016/05/04	40.3	Training	109	52331	819	4005	Training_976
B6D2F1/J	F	LL5-3	2016/04/14	21.6	Validation	127	63069	6761	4006	Validation_140
MRL/MpJ	F	LL5-2	2016/04/18	32.5	Training	129	53795	730	4007	Training_977
C57BL/6NJ	F	LL2-3	2016/06/07	19.9	Training	54	121362	775	4008	Training_978
129X1/SvJ	M	LL2-4	2016/04/20	23.3	Training	44	95442	2066	4009	Training_979
C3H/HeOuJ	F	LL3-3	2016/03/28	21	Training	66	51616	888	4010	Training_980
BALB/cByJ	M	LL5-3	2016/02/16	28	Training	122	84750	3056	4011	Training_981
B6D2F1/J	F	LL5-3	2016/04/14	21.6	Training	127	83182	1252	4012	Training_982
NOR/LtJ	M	LL2-3	2016/04/18	27.8	Training	43	94623	4210	4013	Training_983
CB6F1/J	M	LL3-4	2016/03/29	30.4	Training	67	47277	1107	4014	Training_984
PL/J	M	LL6-3	2016/02/15	25.6	Training	144	81086	6834	4015	Training_985
C57BL/6J	F	LL5-3	2016/02/01	18.8	Training	118	55818	689	4016	Training_986
TALLYHO/JngJ	F	LL1-3	2016/04/29	36.5	Training	20	53536	906	4017	Training_987
SM/J	M	LL3-2	2016/12/27	23	Training	88	56475	737	4018	Training_988
MA/MyJ	M	LL1-4	2017/01/24	33.5	Training	30	17341	957	4019	Training_989
KK.Cg-A<y>/J	F	LL3-2	2016/08/19	34.9	Training	84	6713	1901	4020	Training_990
MA/MyJ	M	LL4-2	2017/01/12	23.6	Training	115	120839	818	4021	Training_991
C57BL/6J	F	LL2-4	2016/09/13	25.5	Training	56	99992	964	4022	Training_992
A/J	F	LL1-2	2016/04/06	20.4	Training	15	31514	7807	4023	Training_993
CBA/J	F	LL2-1	2016/05/10	20.2	Validation	48	63049	1191	4024	Validation_141
129P3/J	F	LL3-4	2016/04/12	20.6	Training	74	68175	4591	4025	Training_994
B6129SF1/J	M	LL5-4	2016/06/06	38	Training	137	52559	5438	4026	Training_995
A/J	F	LL1-1	2016/04/06	19.5	Training	14	143969	1363	4027	Training_996
WB/ReJ Kit<W>/J	M	LL2-1	2016/02/23	26.1	Training	37	96245	9154	4028	Training_997
TALLYHO/JngJ	F	LL1-3	2016/04/29	36.5	Training	20	17826	1141	4029	Training_998
BTBR T<+>ltpr3<tf>/J	F	LL2-4	2016/04/13	26	Validation	42	50139	2351	4030	Validation_142
NOR/LtJ	F	LL5-4	2016/04/18	20.8	Training	130	50039	1391	4031	Training_999
CZECHII/EiJ	F	LL3-2	2017/01/04	13	Training	91	117280	1752	4032	Training_1000
TALLYHO/JngJ	F	LL4-2	2016/05/04	40.3	Training	109	49472	2746	4033	Training_1001
NZBWF1/J	F	LL1-4	2016/07/01	44	Training	24	65972	6071	4034	Training_1002
C57BLKS/J	M	LL2-2	2016/03/01	27.3	Training	39	72825	1279	4035	Training_1003
PWD/PhJ	M	LL1-4	2016/12/27	18.4	Training	25	19930	2912	4036	Training_1004
AKR/J	F	LL3-4	2016/04/04	29.9	Training	69	36138	1982	4037	Training_1005
B6AF1/J	M	LL2-1	2016/03/07	28.2	Training	40	43710	675	4038	Training_1006
CAF1/J	F	LL1-2	2016/05/02	25.7	Training	21	7801	1269	4039	Training_1007
CAST/EiJ	M	LL4-3	2016/01/19	16.2	Training	95	89825	816	4040	Training_1008
129X1/SvJ	M	LL2-4	2016/04/20	23.3	Training	44	15855	778	4041	Training_1009
B6AF1/J	M	LL2-1	2016/03/07	28.2	Validation	40	91506	3680	4042	Validation_143
C57BLKS/J	M	LL2-2	2016/03/01	27.3	Training	39	49926	3310	4043	Training_1010
CByB6F1/J	M	LL4-3	2016/03/08	28.4	Training	100	103979	1489	4044	Training_1011
BALB/cByJ	M	LL5-1	2016/02/16	29.2	Training	121	65757	2088	4045	Training_1012
B6D2F1/J	F	LL5-3	2016/04/14	21.6	Training	127	104482	1310	4046	Training_1013
KK/HiJ	M	LL6-2	2016/12/27	31.1	Training	155	67037	6212	4047	Training_1014
B6129PF1/J	M	LL5-3	2016/04/28	30.6	Training	131	28565	1134	4048	Training_1015
A/J	F	LL1-2	2016/04/06	20.4	Training	15	89944	5749	4049	Training_1016
C57BL/6J	M	LL4-2	2016/07/19	30.4	Training	113	57161	578	4050	Training_1017
CAF1/J	F	LL2-4	2016/05/02	22.6	Training	46	42251	1048	4051	Training_1018
B6D2F1/J	F	LL5-3	2016/04/14	21.6	Training	127	107101	1500	4052	Training_1019
NON/ShiLtJ	M	LL3-1	2016/04/13	28	Training	75	99189	698	4053	Training_1020
B6.SJL-Ptprc<a> Pepc<b>/BoyJ	F	LL3-2	2016/01/11	22.6	Training	61	36168	809	4054	Training_1021
WBB6F1/J-Kit<W>/Kit<W-v>/J	M	LL1-2	2016/03/23	25.3	Training	12	113962	5132	4055	Training_1022
CBA/J	F	LL2-4	2016/05/10	22.1	Training	49	44780	634	4056	Training_1023
TALLYHO/JngJ	F	LL1-3	2016/04/29	36.5	Training	20	3257	2892	4057	Training_1024
B6CBAF1/J	M	LL2-4	2016/04/29	30.5	Training	45	88340	1108	4058	Training_1025
AKR/J	M	LL3-2	2016/04/05	35.3	Training	70	47900	1714	4059	Training_1026
C57BL/6NJ	F	LL2-3	2016/06/07	19.9	Training	54	65104	660	4060	Training_1027
NOR/LtJ	M	LL2-3	2016/04/18	27.8	Training	43	69772	4059	4061	Training_1028
KK.Cg-A<y>/J	F	LL3-3	2016/08/19	30.4	Training	85	94275	1008	4062	Training_1029
A/J	F	LL1-2	2016/04/06	20.4	Training	15	62362	3350	4063	Training_1030
B6CBAF1/J	M	LL3-3	2016/04/29	31.5	Training	78	105364	1881	4064	Training_1031
PL/J	M	LL4-3	2016/02/15	27.1	Training	98	26864	738	4065	Training_1032
CBA/CaJ	M	LL3-1	2016/06/09	27.8	Training	82	24090	1159	4066	Training_1033
TALLYHO/JngJ	F	LL1-3	2016/04/29	36.5	Training	20	83984	3432	4067	Training_1034
B6AF1/J	M	LL1-4	2016/04/14	25.5	Training	17	44767	1205	4068	Training_1035
PL/J	M	LL4-3	2016/02/15	27.1	Validation	98	79318	2469	4069	Validation_144
CBA/CaJ	M	LL3-1	2016/06/09	27.8	Training	82	83218	1770	4070	Training_1036
KK/HiJ	M	LL6-2	2016/12/27	31.1	Training	155	86716	1427	4071	Training_1037
C57BL/6NJ	M	LL4-4	2015/12/08	27.8	Training	94	35340	1101	4072	Training_1038
129P3/J	F	LL3-3	2016/04/12	18.6	Training	73	12553	1397	4073	Training_1039
SM/J	M	LL3-2	2016/12/27	23	Training	88	41419	726	4074	Training_1040
A/J	F	LL1-1	2016/04/06	19.5	Training	14	145795	866	4075	Training_1041
C3H/HeOuJ	M	LL1-1	2016/03/22	25.3	Validation	10	98750	945	4076	Validation_145
TALLYHO/JngJ	F	LL3-3	2016/05/04	35.8	Validation	80	64568	964	4077	Validation_146
WB/ReJ Kit<W>/J	F	LL1-3	2016/02/15	23.5	Training	8	107200	721	4078	Training_1042
CAF1/J	M	LL1-3	2016/04/07	26.2	Training	16	98417	5801	4079	Training_1043
WB/ReJ Kit<W>/J	F	LL5-4	2016/01/26	22	Validation	117	86603	860	4080	Validation_147
A/J	F	LL1-2	2016/04/06	20.4	Training	15	155142	1571	4081	Training_1044
B6129SF1/J	M	LL5-4	2016/06/06	38	Training	137	100676	2905	4082	Training_1045
NOR/LtJ	F	LL2-1	2016/02/16	20.4	Training	36	86701	2279	4083	Training_1046
129S1/SvlmJ	M	LL2-2	2016/05/11	23.3	Training	50	52456	4099	4084	Training_1047
NOR/LtJ	F	LL5-4	2016/04/18	20.8	Training	130	112738	1245	4085	Training_1048
B6CBAF1/J	M	LL3-3	2016/04/29	31.5	Training	78	101648	1633	4086	Training_1049
CAF1/J	M	LL1-3	2016/04/07	26.2	Training	16	44678	3437	4087	Training_1050
B6C3F1/J	M	LL1-4	2016/04/28	31	Training	19	79763	758	4088	Training_1051
B6(CG)-Tyr<o-2J>/J	M	LL5-3	2016/05/20	25.2	Training	135	75510	2102	4089	Training_1052
CZECHII/EiJ	F	LL3-4	2017/01/04	11	Training	92	22409	573	4090	Training_1053
CAF1/J	F	LL1-2	2016/05/02	25.7	Training	21	62045	1367	4091	Training_1054
B6D2F1/J	F	LL5-3	2016/04/14	21.6	Training	127	110219	2598	4092	Training_1055
AKR/J	M	LL3-2	2016/04/05	35.3	Training	70	5264	1123	4093	Training_1056
CB6F1/J	M	LL4-4	2016/03/29	29.9	Training	102	42065	1195	4094	Training_1057
129X1/SvJ	M	LL2-4	2016/04/20	23.3	Training	44	82146	1324	4095	Training_1058
B6129PF1/J	F	LL1-2	2016/05/05	19	Training	22	103513	869	4096	Training_1059
A/J	F	LL1-2	2016/04/06	20.4	Validation	15	147861	957	4097	Validation_148
B6D2F1/J	F	LL5-4	2016/04/14	21.8	Training	128	62696	1589	4098	Training_1060
MA/MyJ	M	LL4-2	2017/01/12	23.6	Training	115	104761	1675	4099	Training_1061
WB/ReJ Kit<W>/J	M	LL2-1	2016/02/23	26.1	Training	37	38350	817	4100	Training_1062
NON/ShiLtJ	M	LL3-1	2016/04/13	28	Training	75	113843	1299	4101	Training_1063
WB/ReJ Kit<W>/J	M	LL2-1	2016/02/23	26.1	Training	37	56186	740	4102	Training_1064
NON/ShiLtJ	F	LL2-4	2016/04/04	28.7	Training	41	93647	2419	4103	Training_1065
C3H/HeJ	M	LL4-2	2016/02/08	25.9	Training	97	30276	648	4104	Training_1066
NOR/LtJ	F	LL5-4	2016/04/18	20.8	Training	130	56058	4236	4105	Training_1067
CBA/CaJ	M	LL3-1	2016/06/09	27.8	Training	82	56355	865	4106	Training_1068
129P3/J	F	LL3-3	2016/04/12	18.6	Training	73	101117	5286	4107	Training_1069
CBA/CaJ	F	LL5-1	2016/02/09	22.1	Training	119	27946	863	4108	Training_1070
MA/MyJ	M	LL1-4	2017/01/24	33.5	Validation	30	46124	1595	4109	Validation_149
TALLYHO/JngJ	F	LL4-2	2016/05/04	40.3	Training	109	26318	979	4110	Training_1071
AKR/J	F	LL5-4	2016/04/04	25.1	Training	124	31511	1247	4111	Training_1072
B6(CG)-Tyr<o-2J>/J	M	LL6-1	2016/05/20	25	Validation	153	79433	755	4112	Validation_150
PL/J	M	LL6-3	2016/02/15	25.6	Training	144	106889	1116	4113	Training_1073
MA/MyJ	M	LL1-2	2017/01/24	21.4	Training	29	37646	1009	4114	Training_1074
KK/HiJ	F	LL4-2	2017/01/04	32.5	Training	114	52839	1631	4115	Training_1075
BUB/BnJ	F	LL3-2	2016/12/28	23.6	Training	89	30264	646	4116	Training_1076
NOR/LtJ	M	LL2-3	2016/04/18	27.8	Training	43	99180	23922	4117	Training_1077
CAF1/J	F	LL2-4	2016/05/02	22.6	Training	46	58335	3407	4118	Training_1078
PL/J	F	LL5-2	2016/02/15	18.1	Training	120	105188	2817	4119	Training_1079
RIIIS/J	F	LL5-1	2017/01/24	16.7	Training	141	20322	963	4120	Training_1080
TALLYHO/JngJ	F	LL1-3	2016/04/29	36.5	Validation	20	96820	4893	4121	Validation_151
129P3/J	F	LL3-3	2016/04/12	18.6	Training	73	59748	651	4122	Training_1081
MA/MyJ	M	LL1-4	2017/01/24	33.5	Training	30	45039	946	4123	Training_1082
BALB/cByJ	M	LL5-3	2016/02/16	28	Training	122	79644	829	4124	Training_1083
NOD/ShiLtJ	F	LL5-2	2016/05/26	19.9	Training	136	56595	1384	4125	Training_1084
CAF1/J	F	LL2-4	2016/05/02	22.6	Training	46	89652	1785	4126	Training_1085
BALB/cJ	M	LL3-2	2016/04/11	27.6	Validation	72	1785	1514	4127	Validation_152
TALLYHO/JngJ	F	LL3-3	2016/05/04	35.8	Training	80	83731	2449	4128	Training_1086
MA/MyJ	M	LL1-2	2017/01/24	21.4	Training	29	76436	1343	4129	Training_1087
PL/J	F	LL5-2	2016/02/15	18.1	Training	120	56292	2652	4130	Training_1088
129X1/SvJ	M	LL2-4	2016/04/20	23.3	Training	44	62935	4046	4131	Training_1089
BALB/cByJ	M	LL5-1	2016/02/16	29.2	Validation	121	5297	718	4132	Validation_153
TALLYHO/JngJ	F	LL3-3	2016/05/04	35.8	Training	80	40711	1445	4133	Training_1090
A/J	F	LL1-2	2016/04/06	20.4	Training	15	123037	1524	4134	Training_1091
NOD/ShiLtJ	F	LL5-2	2016/05/26	19.9	Training	136	17475	753	4135	Training_1092
B6(CG)-Tyr<o-2J>/J	M	LL5-1	2016/05/20	26.2	Training	134	44331	744	4136	Training_1093
BUB/BnJ	M	LL2-4	2016/12/27	30.2	Training	58	63704	13284	4137	Training_1094
KK/HiJ	M	LL6-2	2016/12/27	31.1	Training	155	61890	714	4138	Training_1095
C57BLKS/J	M	LL2-2	2016/03/01	27.3	Training	39	48949	935	4139	Training_1096
BALB/cJ	M	LL4-4	2016/04/11	28.6	Training	105	38918	1564	4140	Training_1097
PL/J	F	LL5-2	2016/02/15	18.1	Training	120	42097	2681	4141	Training_1098
NOR/LtJ	F	LL5-4	2016/04/18	20.8	Training	130	74644	1503	4142	Training_1099
TALLYHO/JngJ	F	LL4-2	2016/05/04	40.3	Training	109	28765	965	4143	Training_1100
