# Supplementary figures and images for: Action detection using a neural network elucidates the genetics of mouse grooming behavior
Source: eLife journal article supplement (doi:10.7554/elife.63207), 2021-03-17

**A**

## Total Grooming

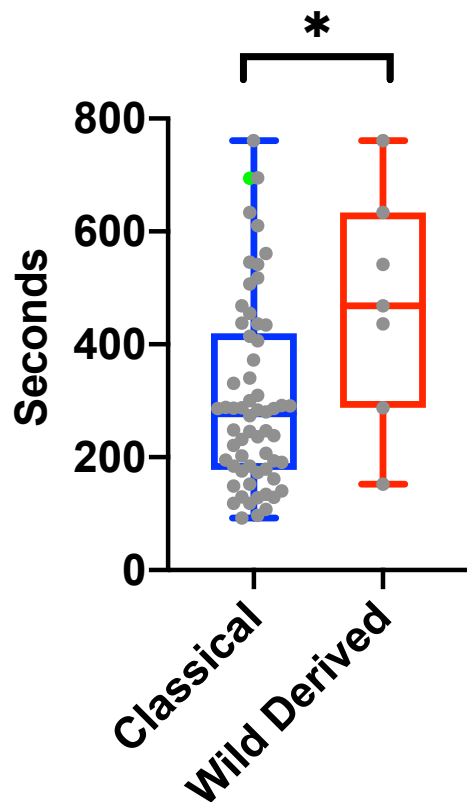**B**

## Avg. Bout Length

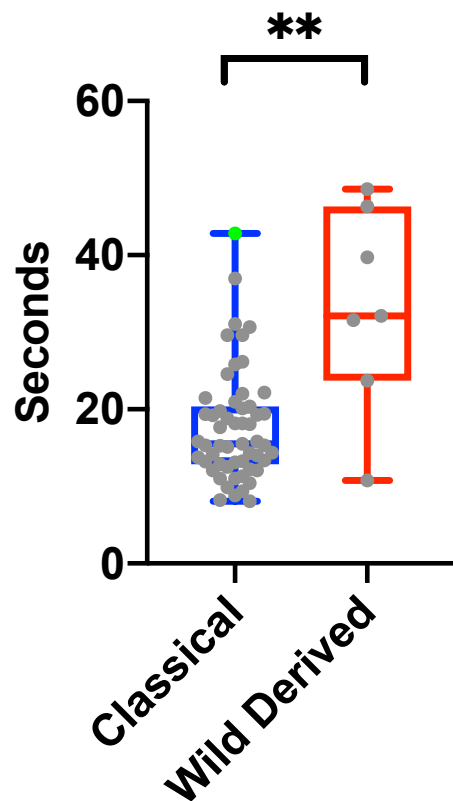

Supplement: supp [file elife-63207-supp-v1.zip]

**A**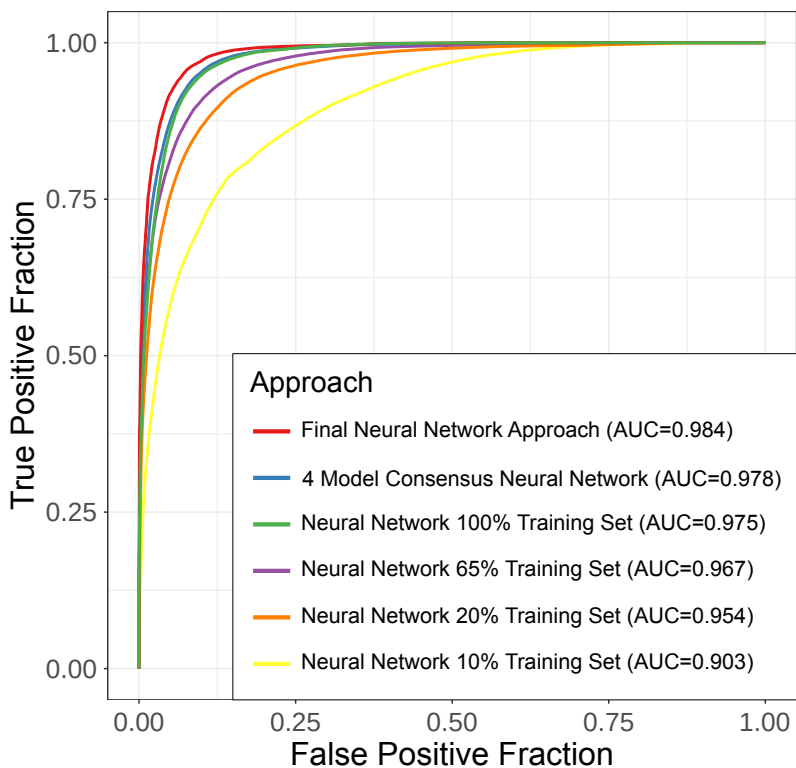**B**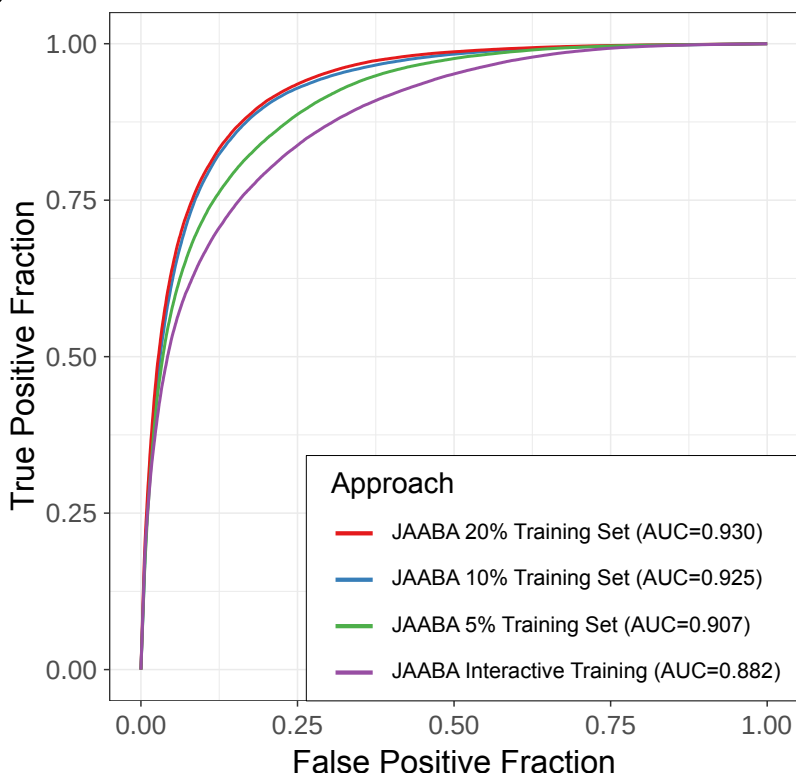

Supplement: supp [file elife-63207-supp-v1.zip]

A

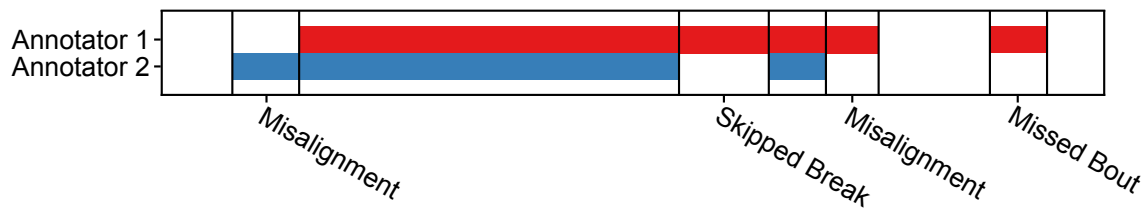

B

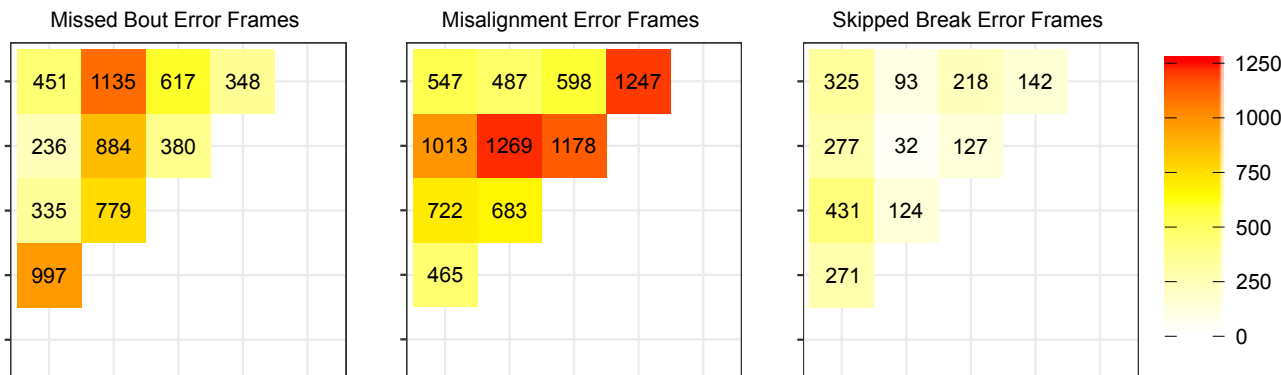

C

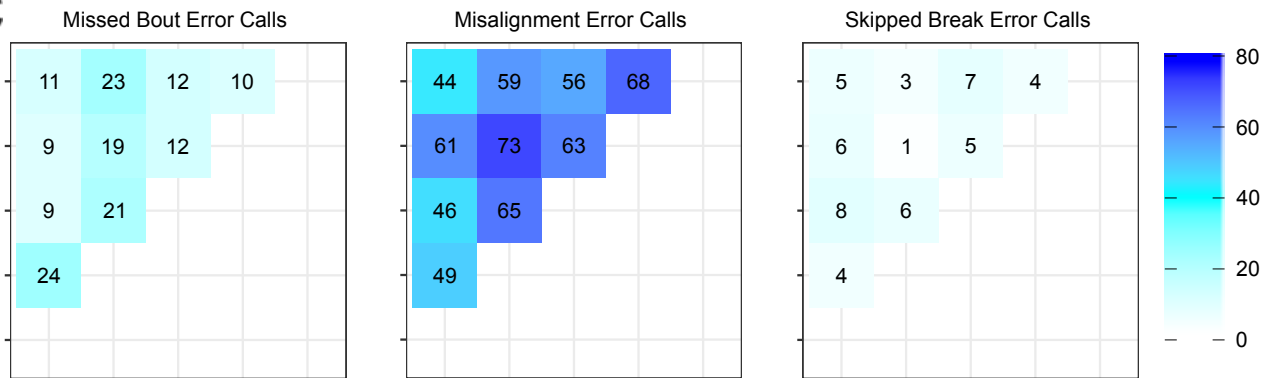

Supplement: supp [file elife-63207-supp-v1.zip]

A

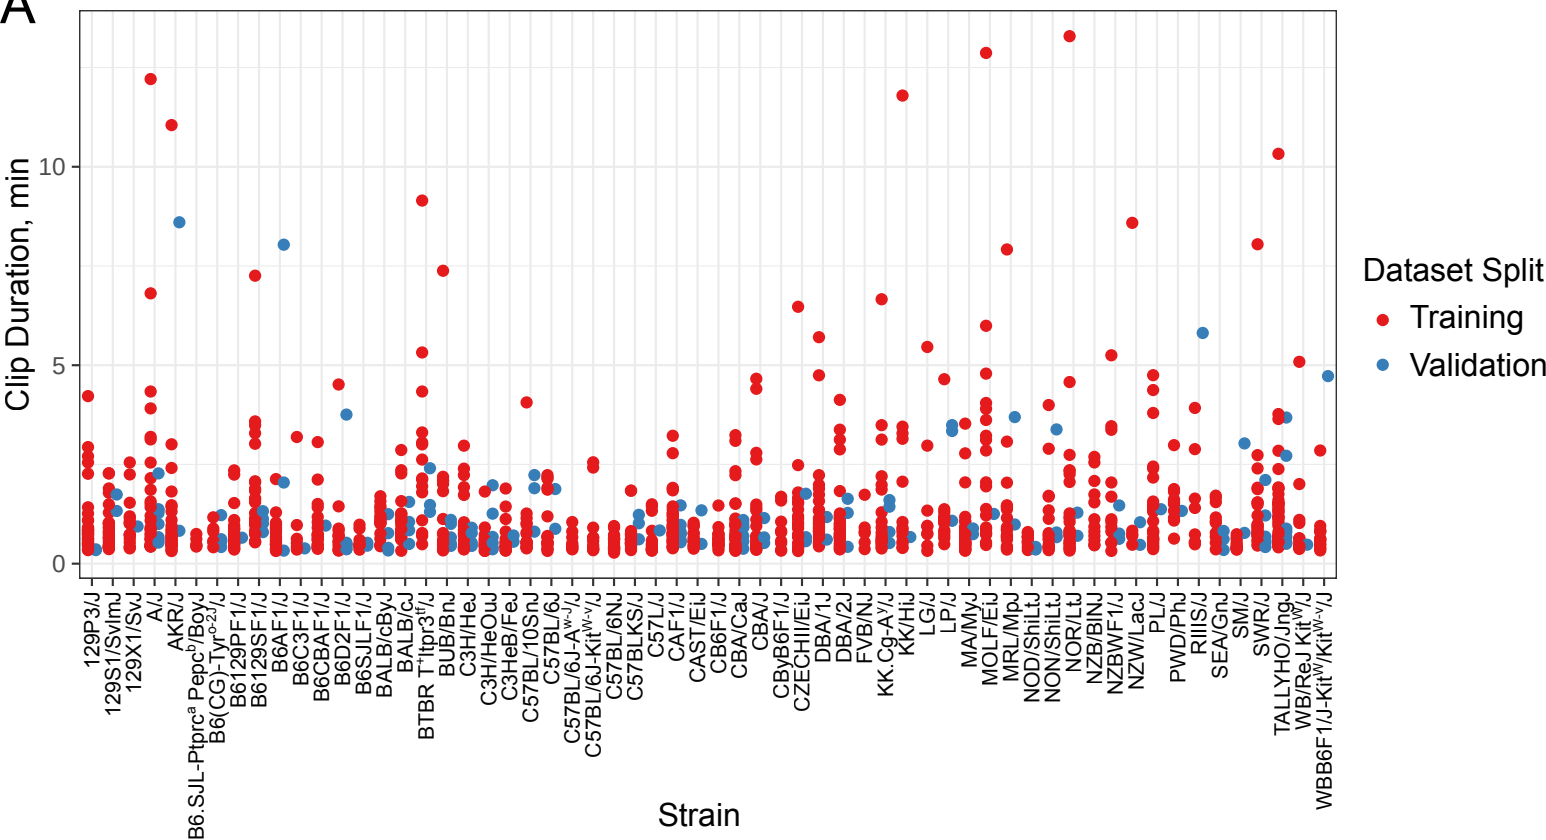

B

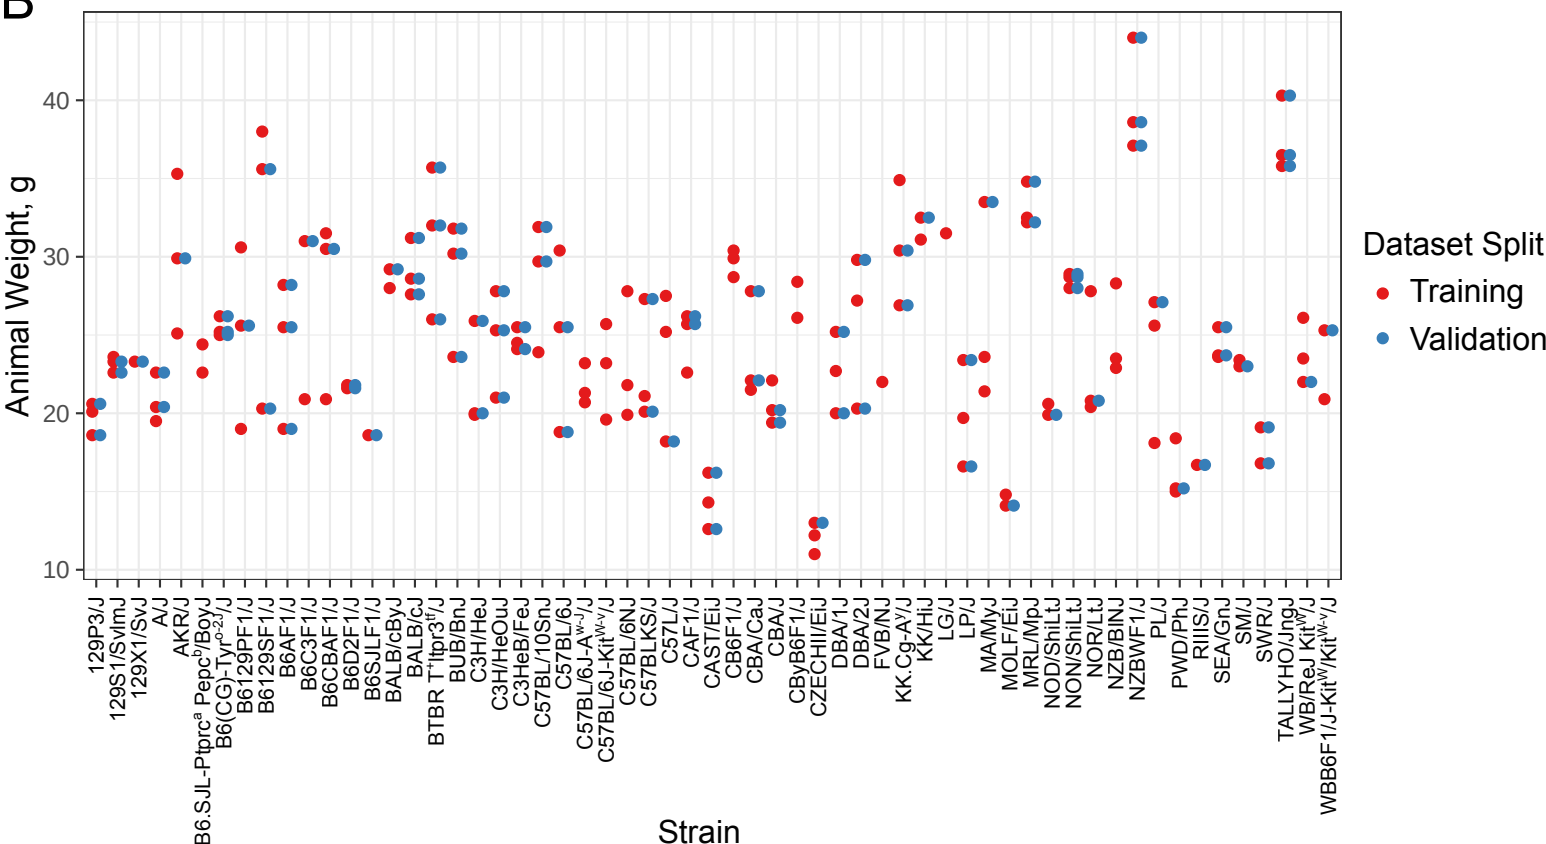

Supplement: supp [file elife-63207-supp-v1.zip › elife_poa_e63207_Figure_2_figure_supplement_1.pdf]

**A**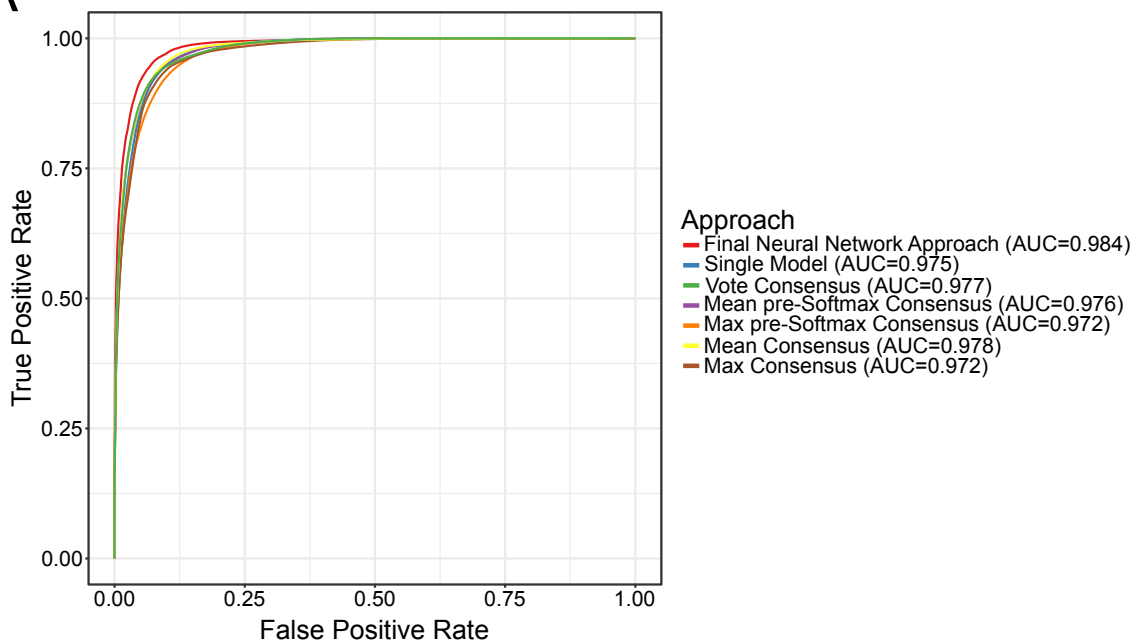**B**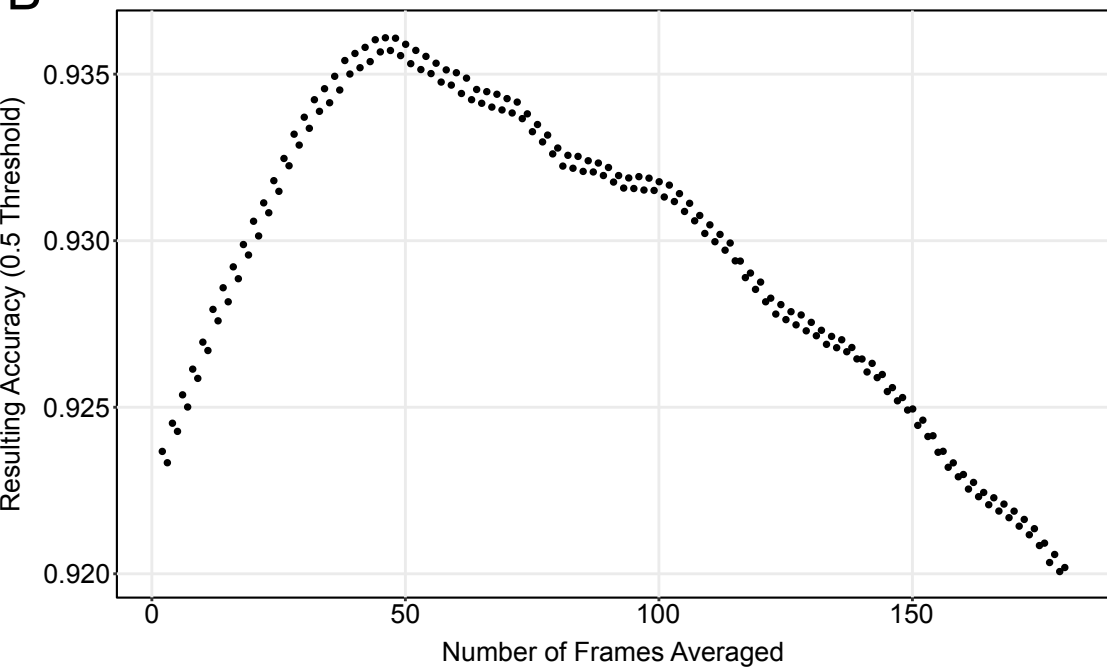

Supplement: supp [file elife-63207-supp-v1.zip › elife_poa_e63207_Figure_3_figure_supplement_3.pdf]

## Grooming kmeans clusters

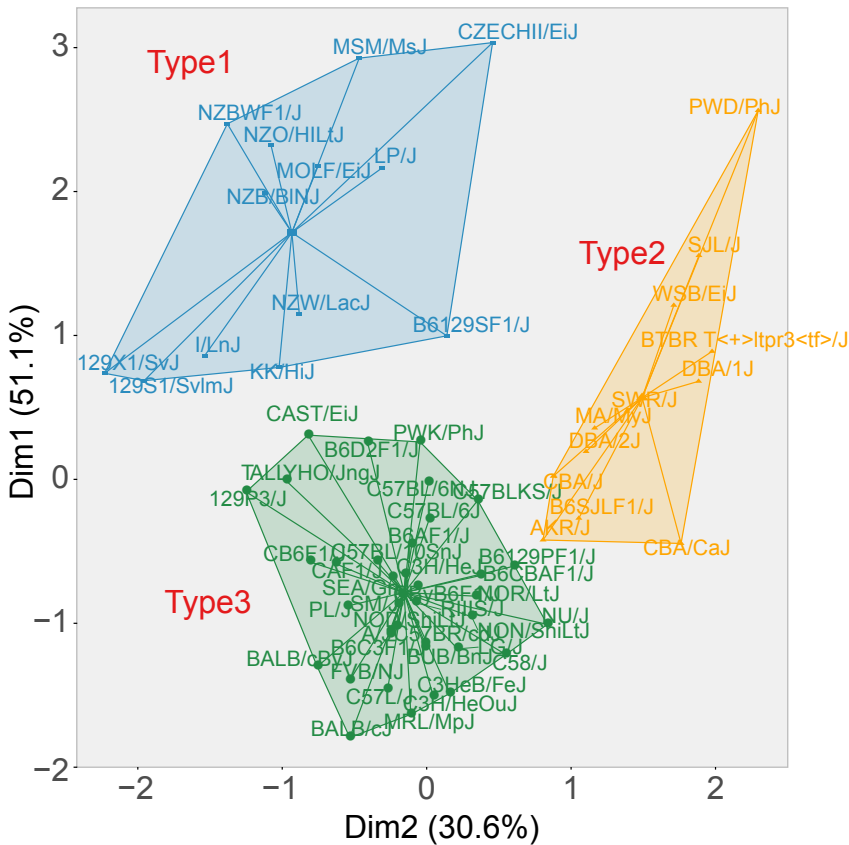

Supplement: supp [file elife-63207-supp-v1.zip › elife_poa_e63207_Figure_8_figure_supplement_1.pdf]

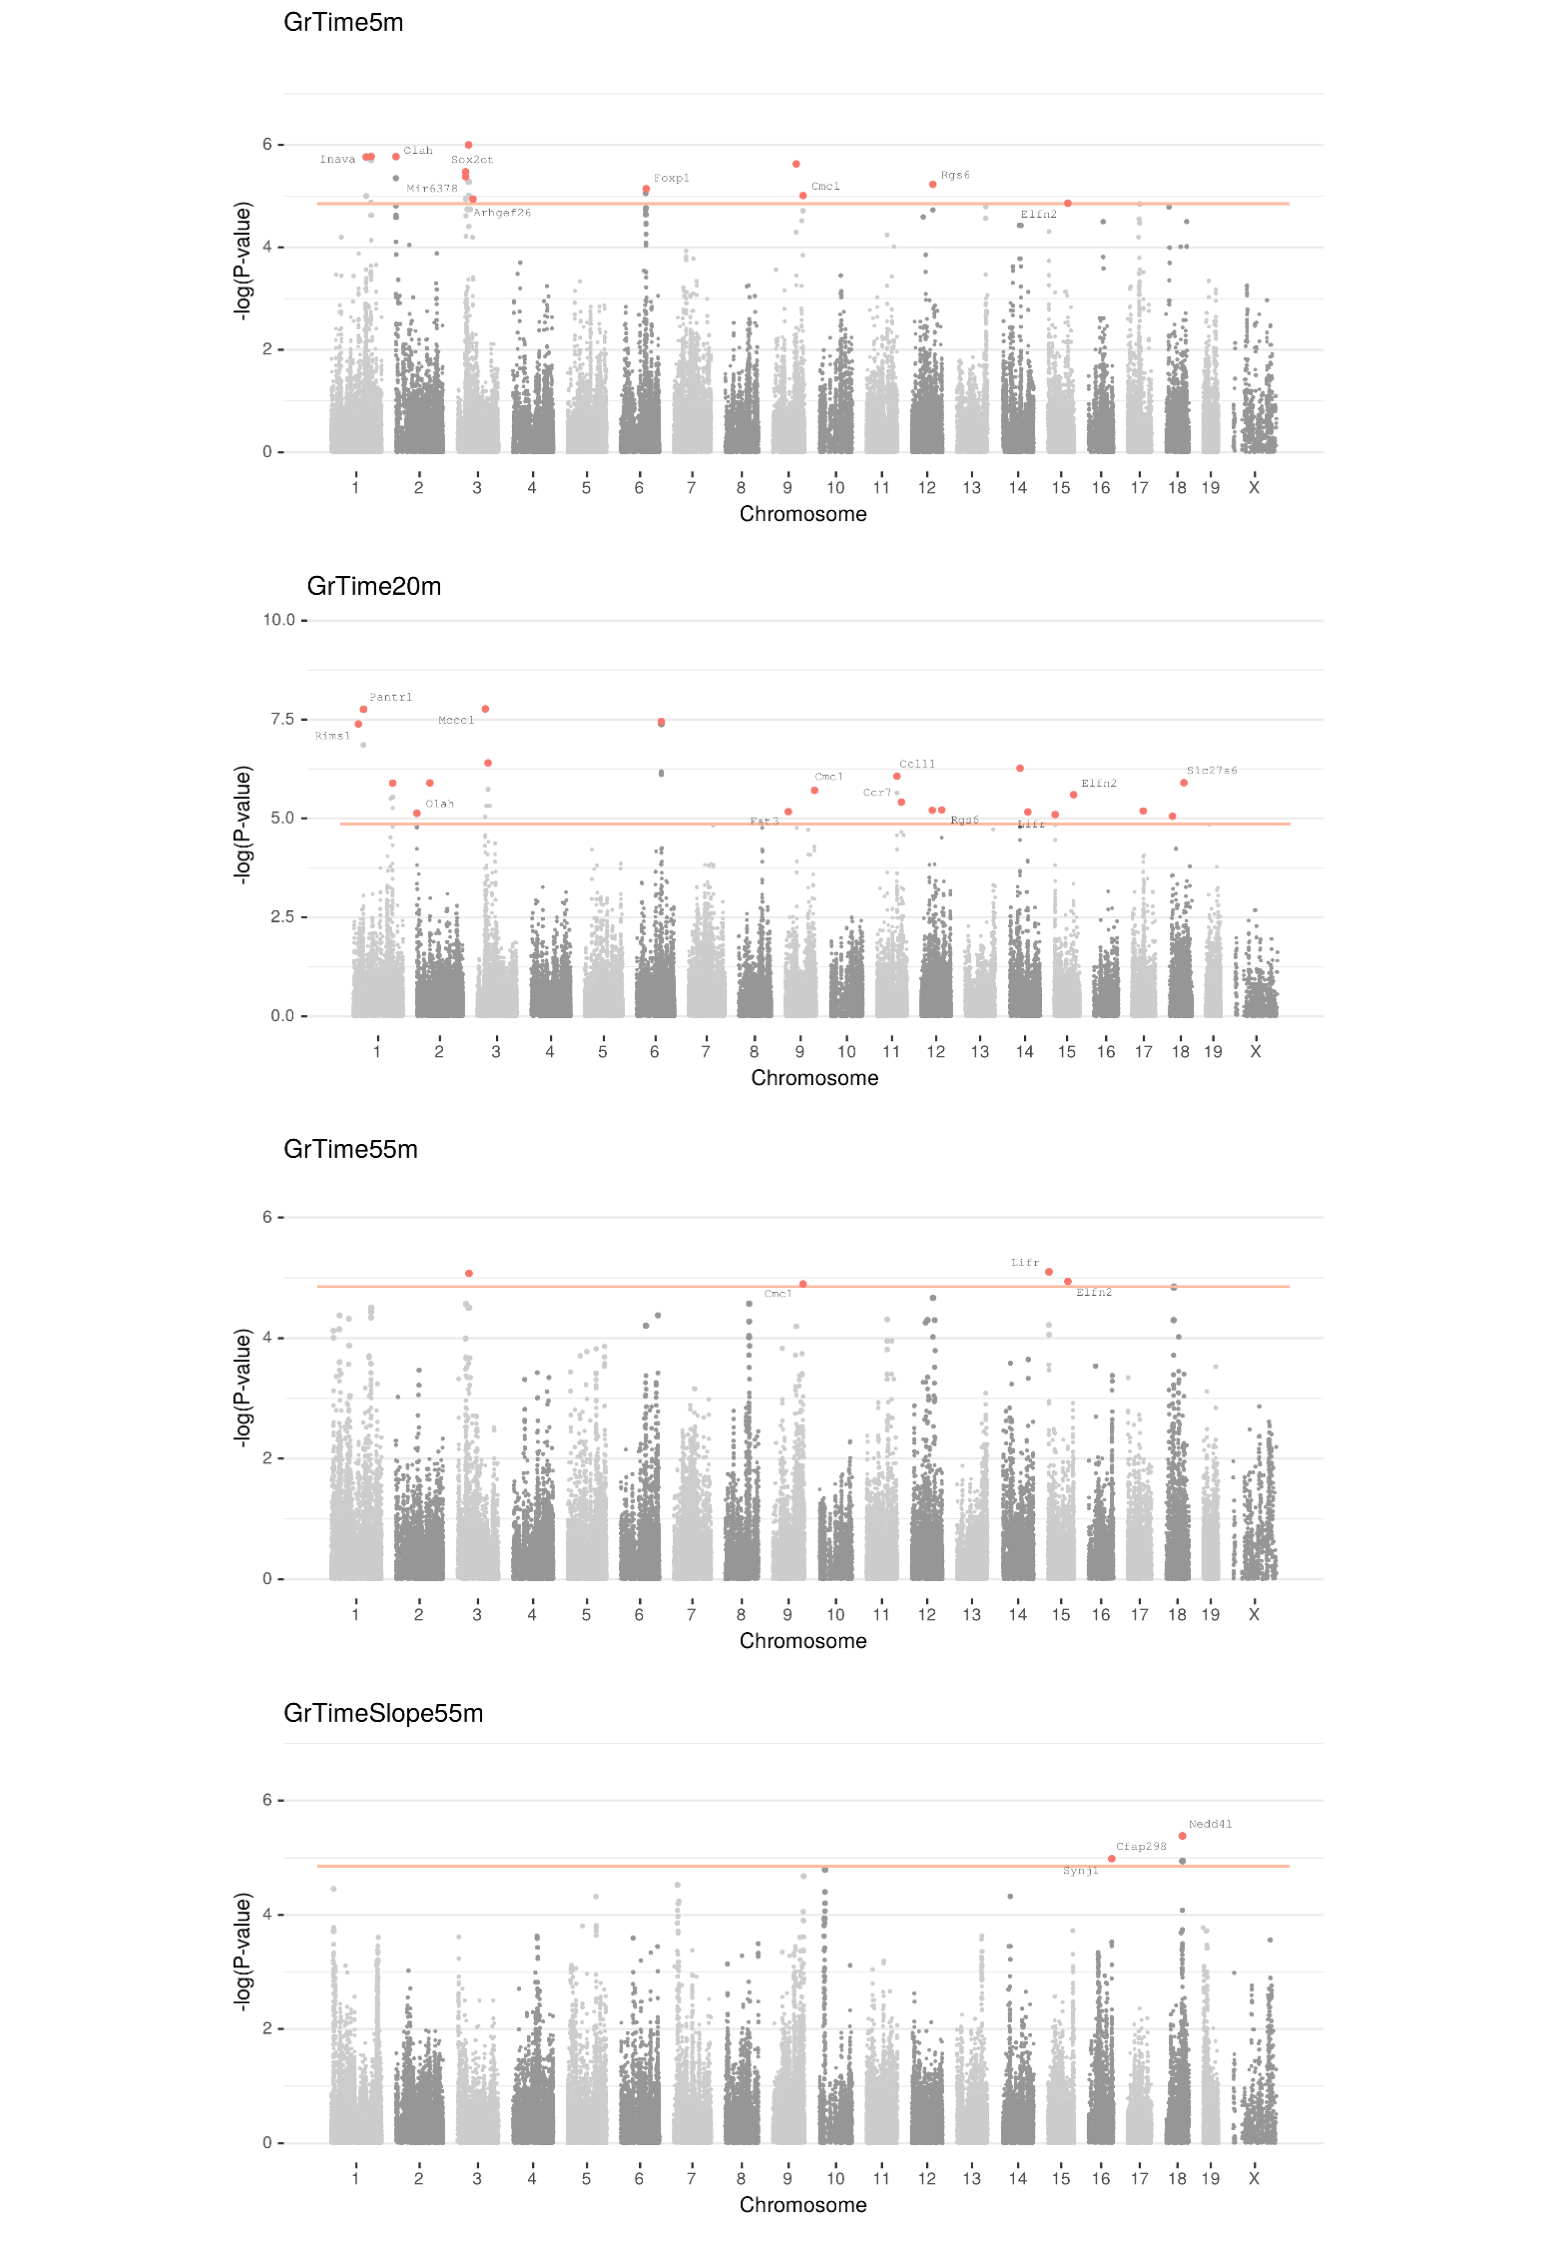

Supplement: supp [file elife-63207-supp-v1.zip › elife_poa_e63207_Figure_9_figure_supplement_1.png]

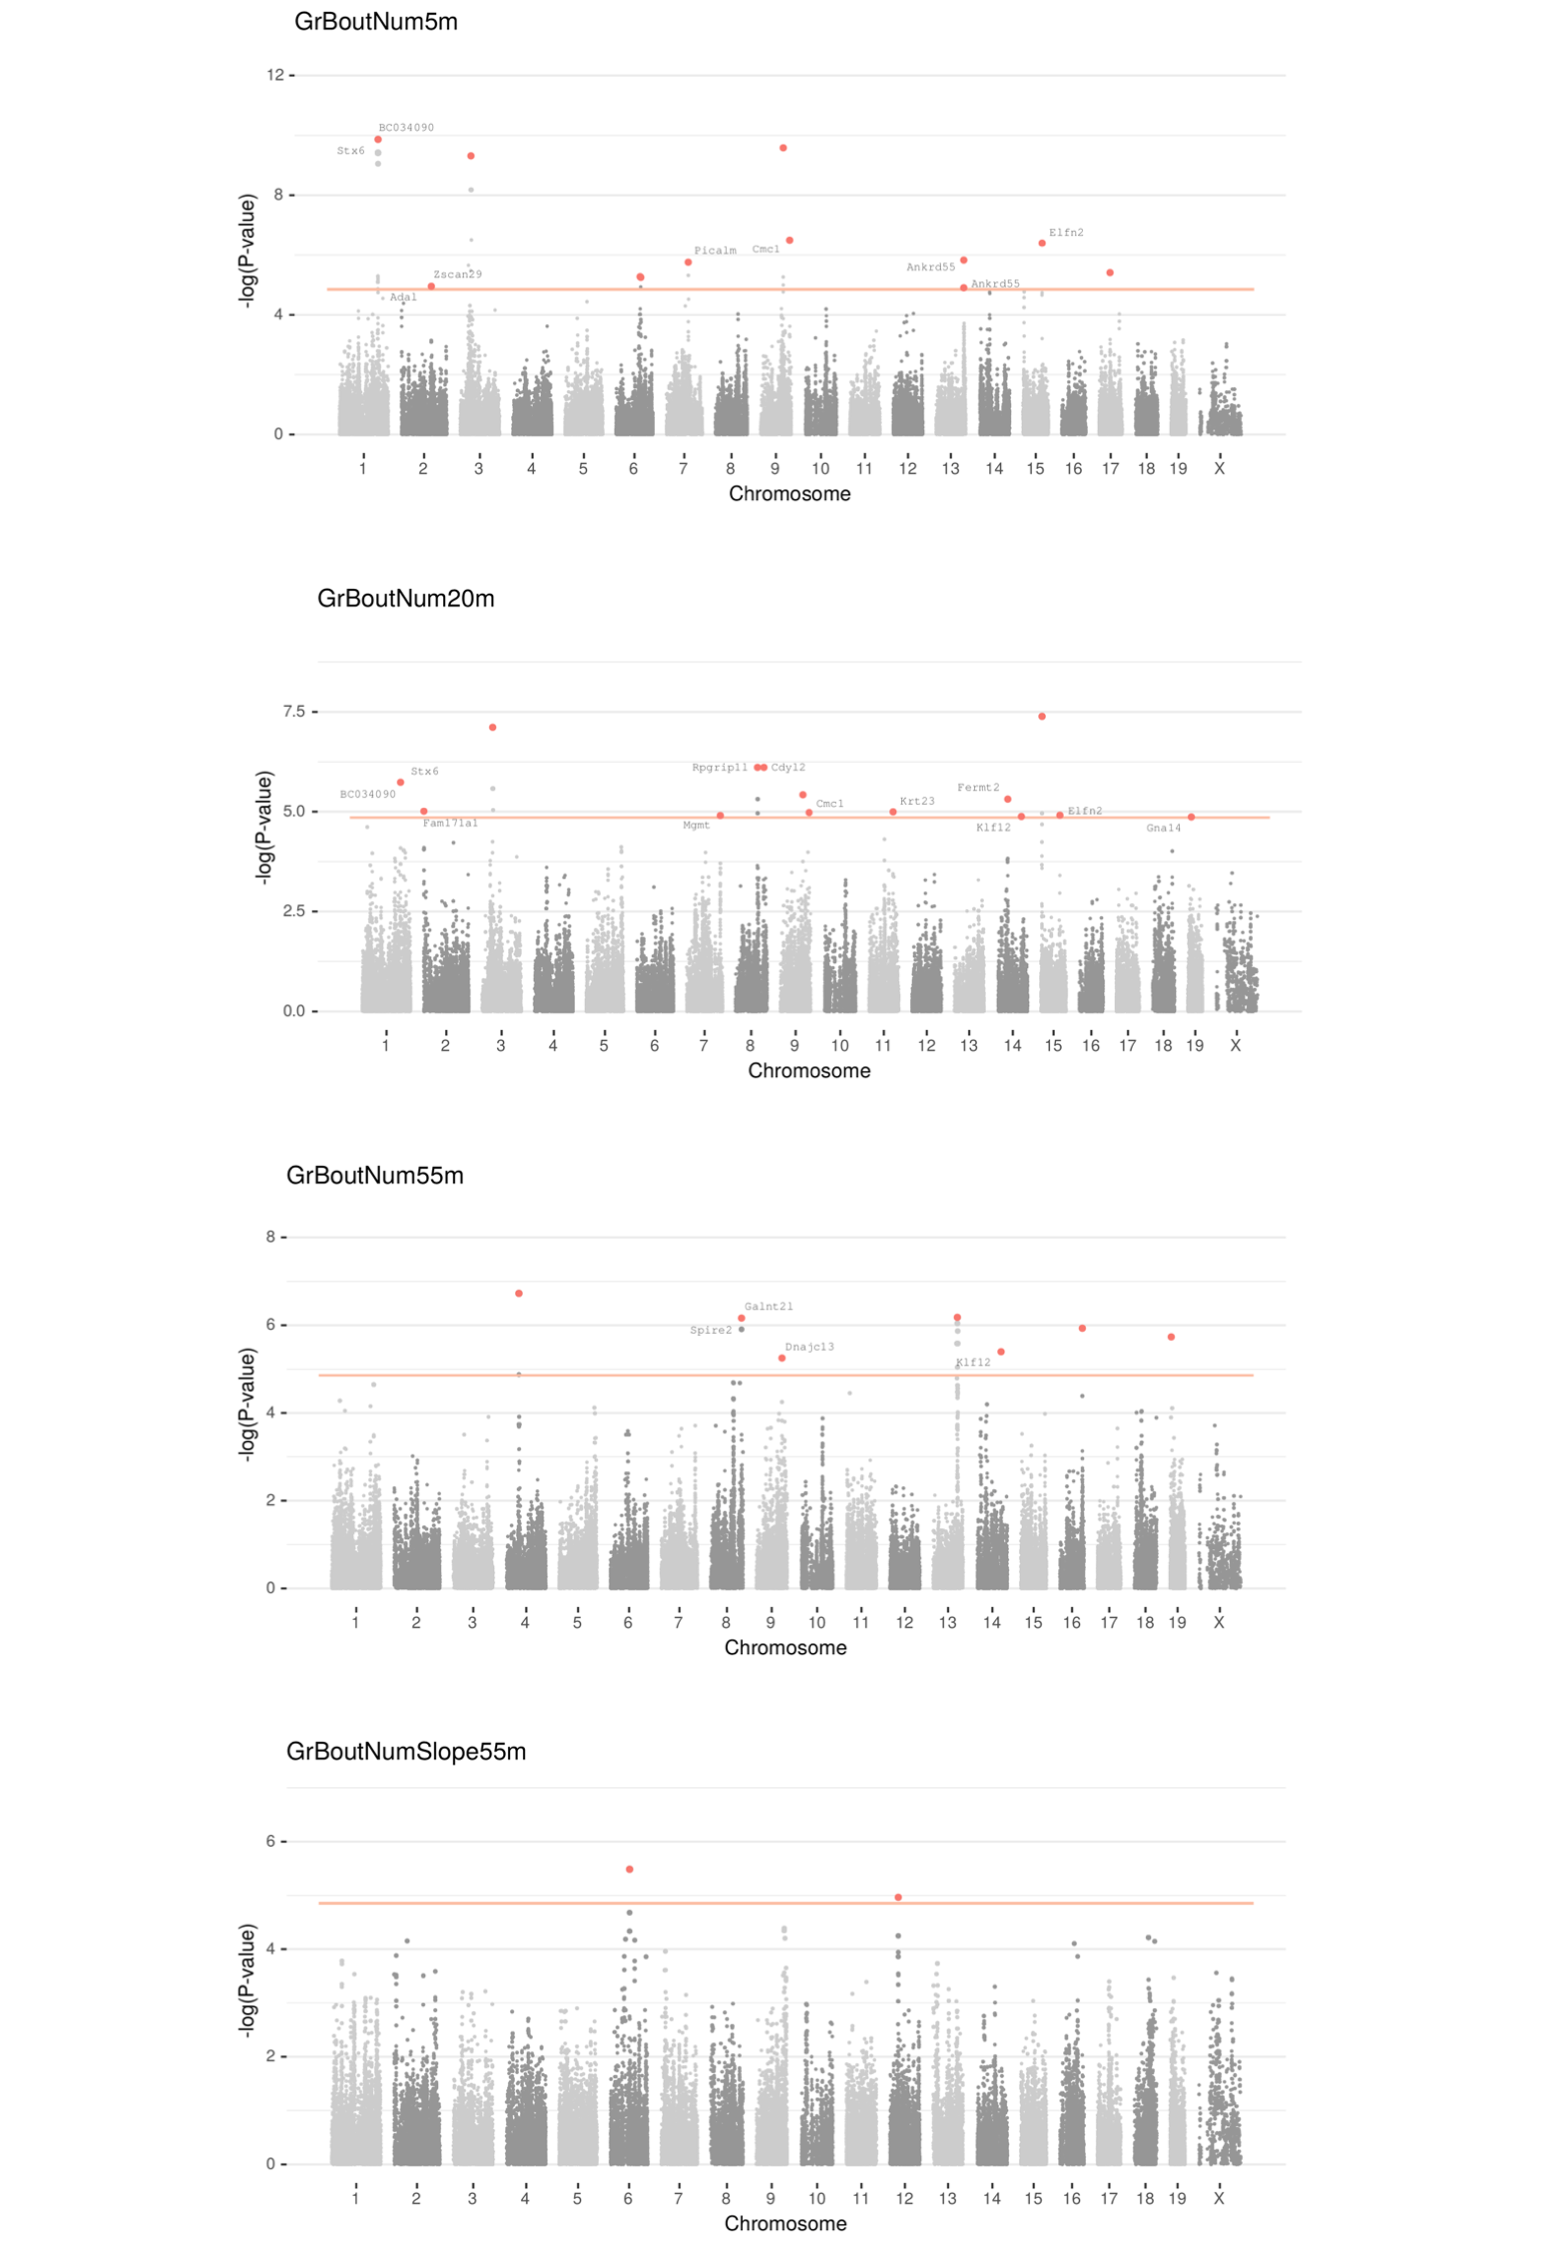

Supplement: supp [file elife-63207-supp-v1.zip › elife_poa_e63207_Figure_9_figure_supplement_2.png]

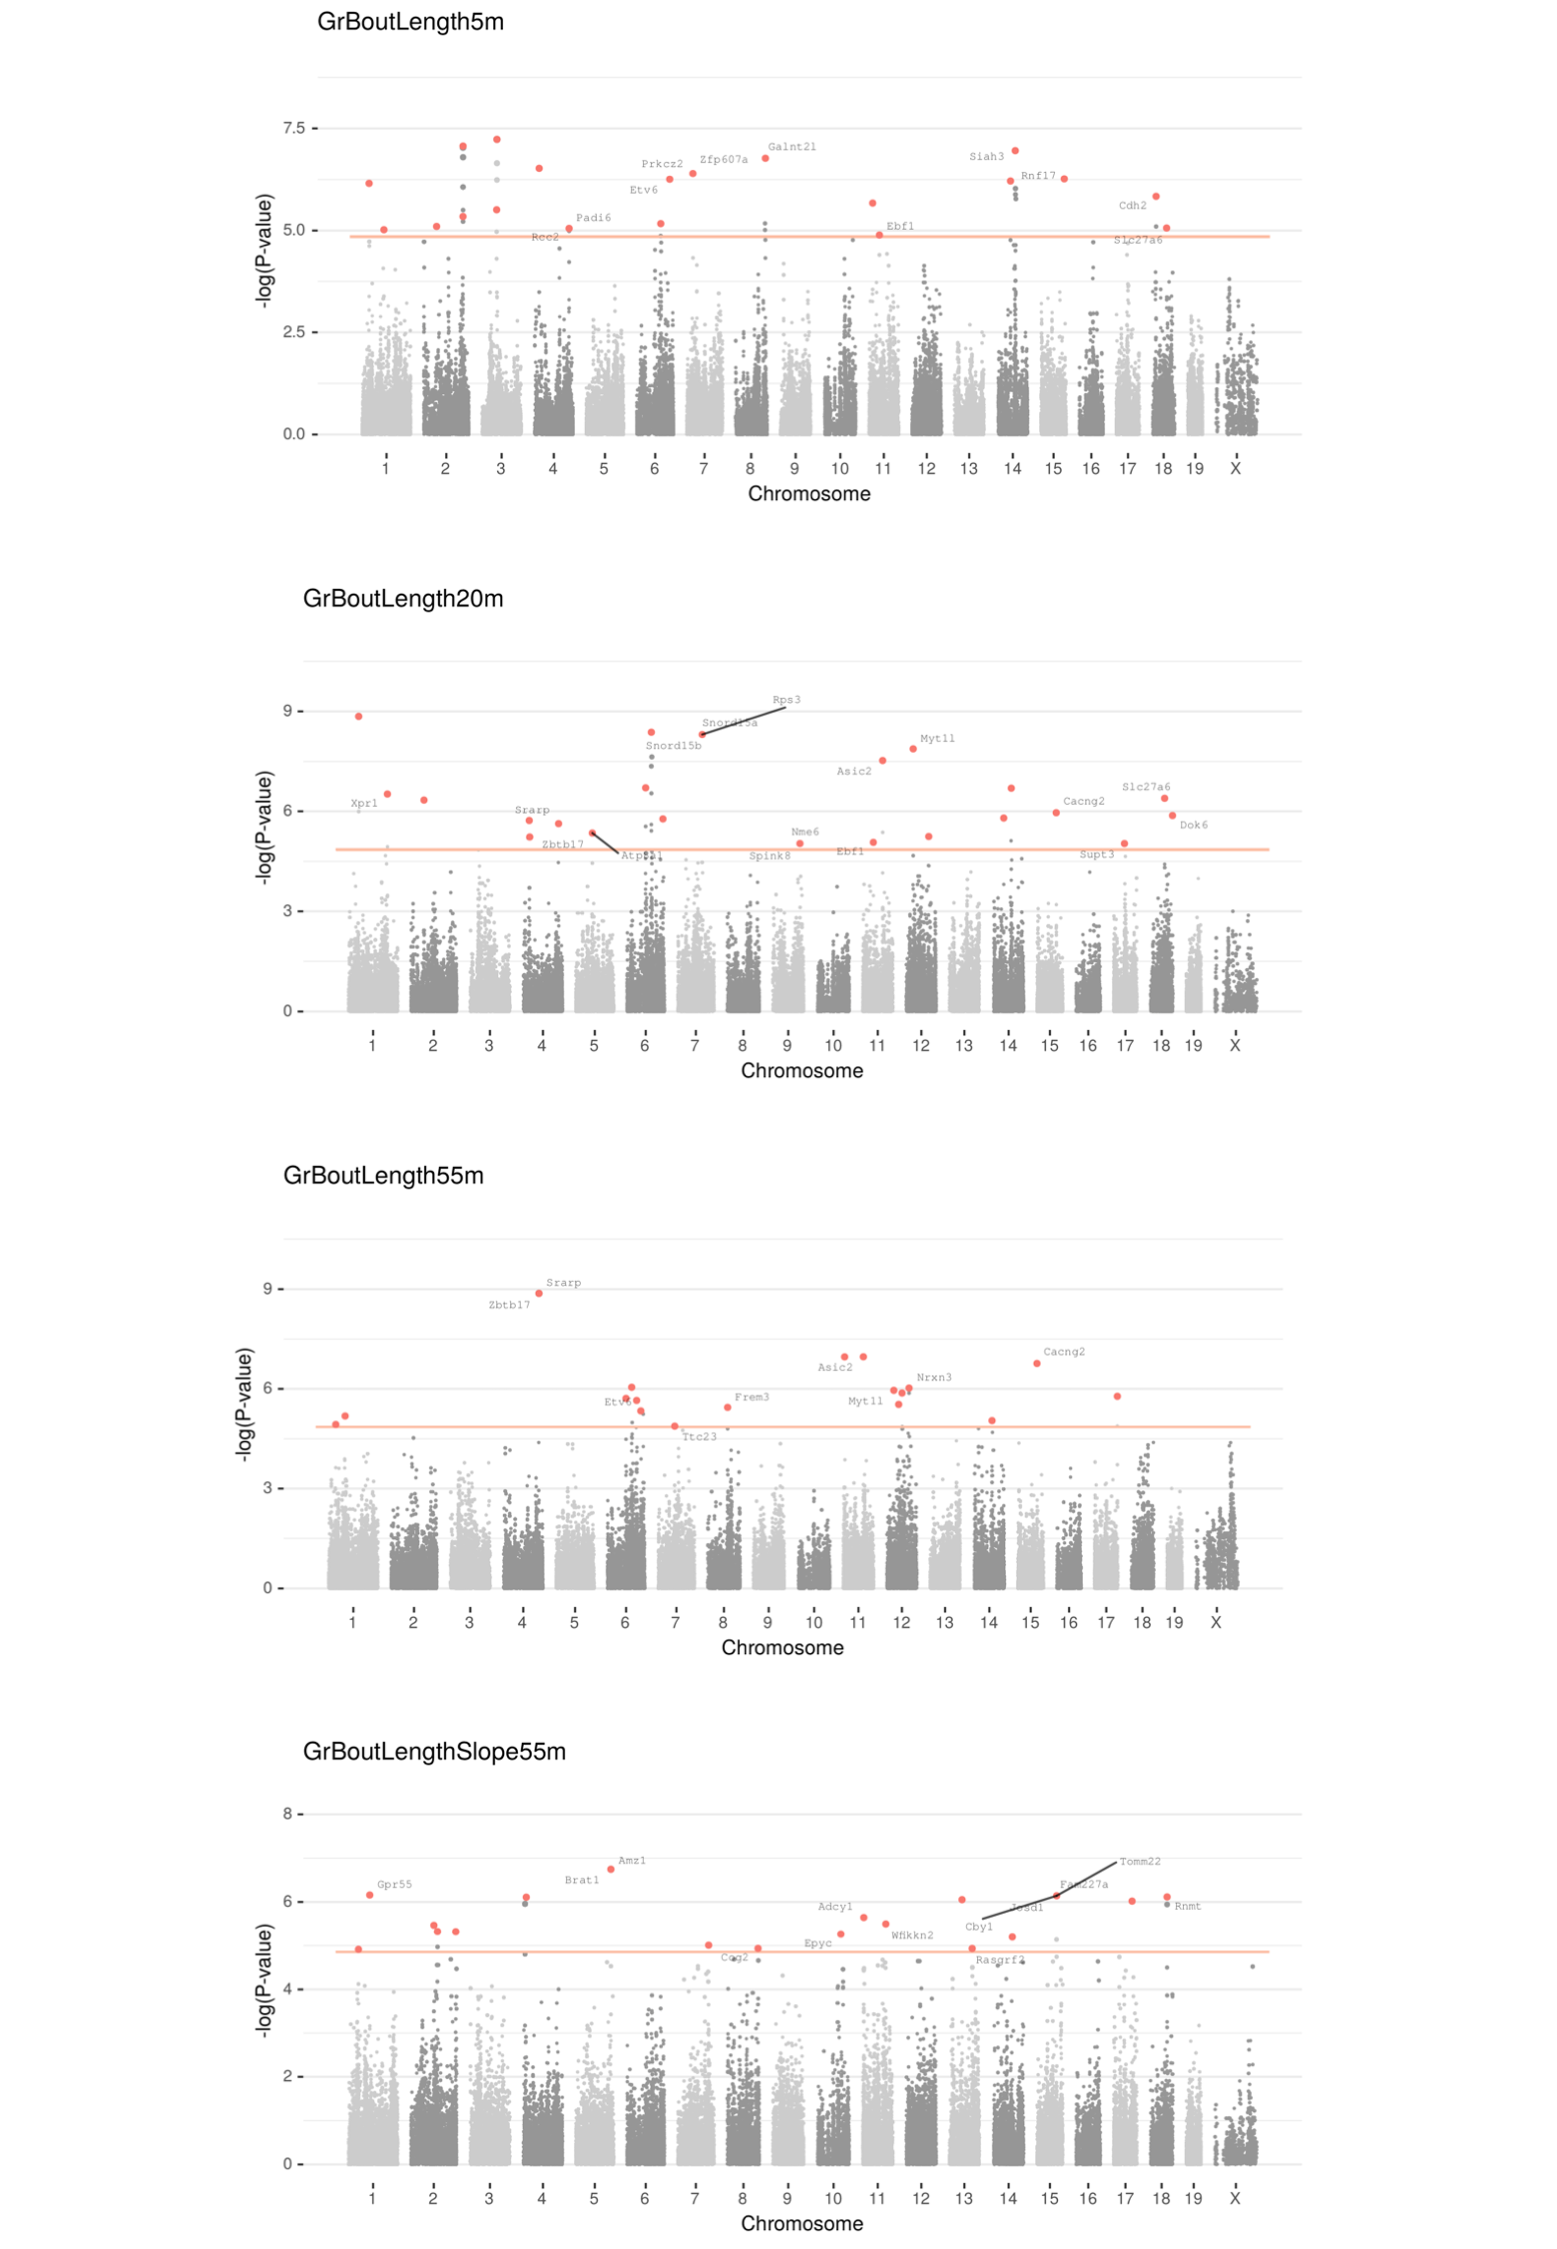

Supplement: supp [file elife-63207-supp-v1.zip › elife_poa_e63207_Figure_9_figure_supplement_3.png]

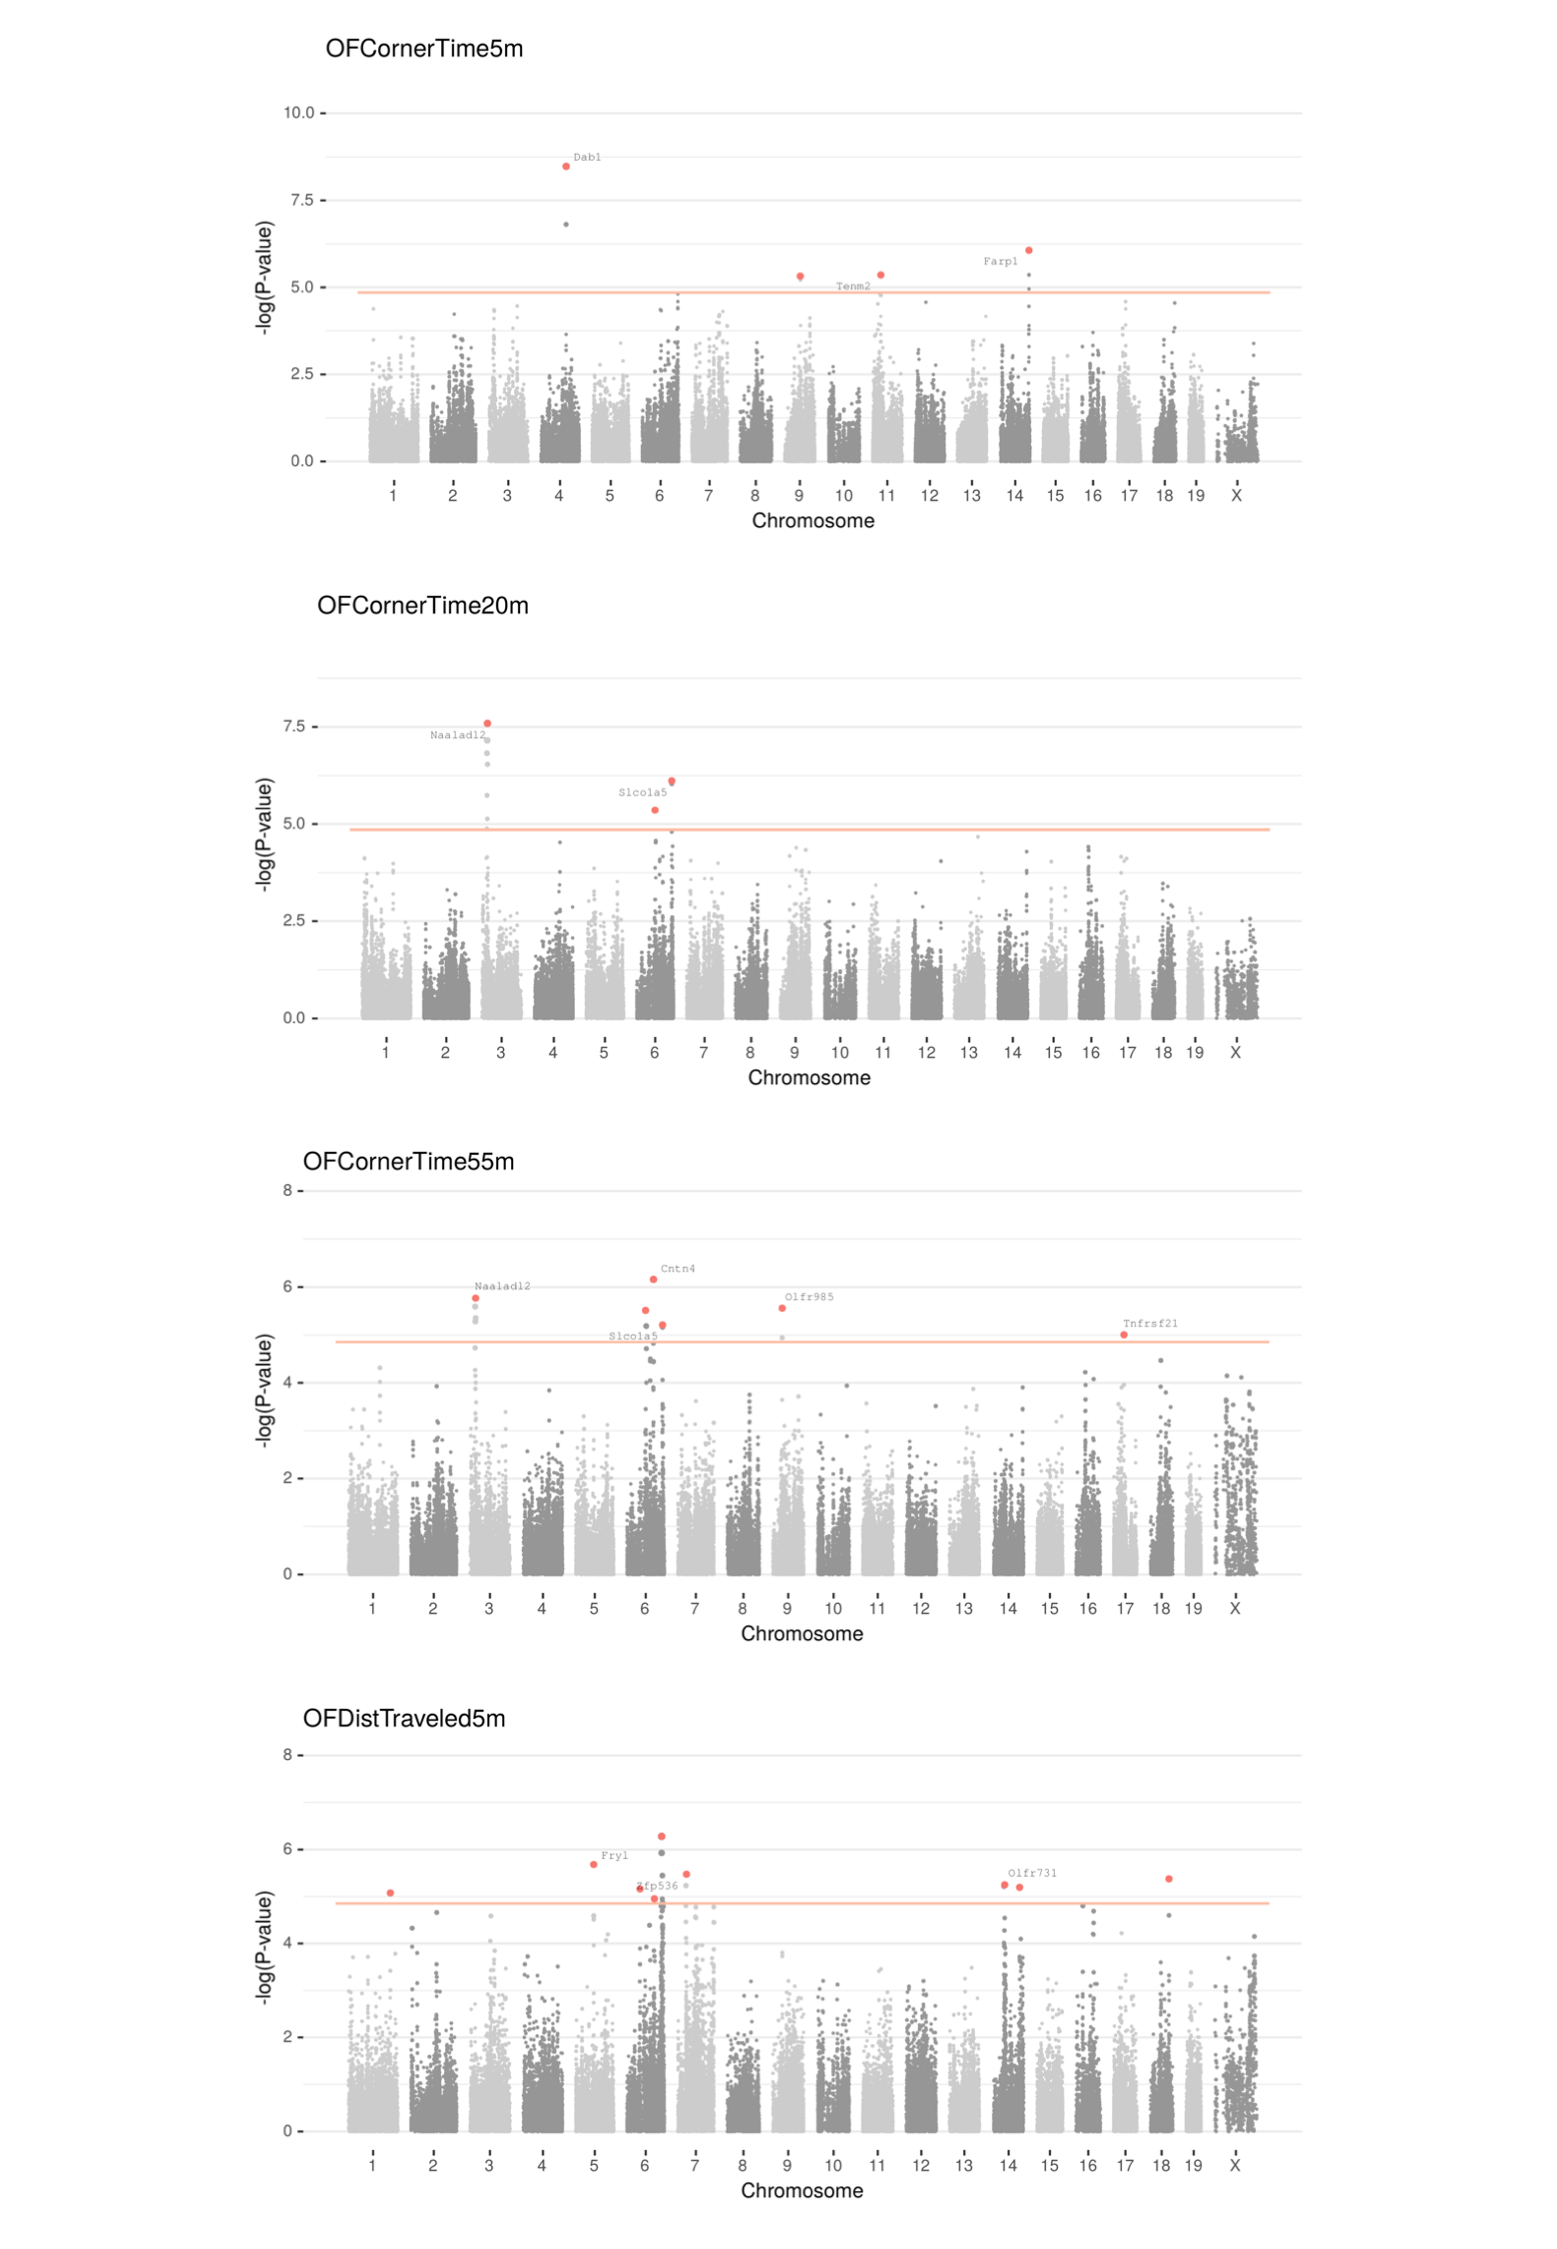

Supplement: supp [file elife-63207-supp-v1.zip › elife_poa_e63207_Figure_9_figure_supplement_4.png]

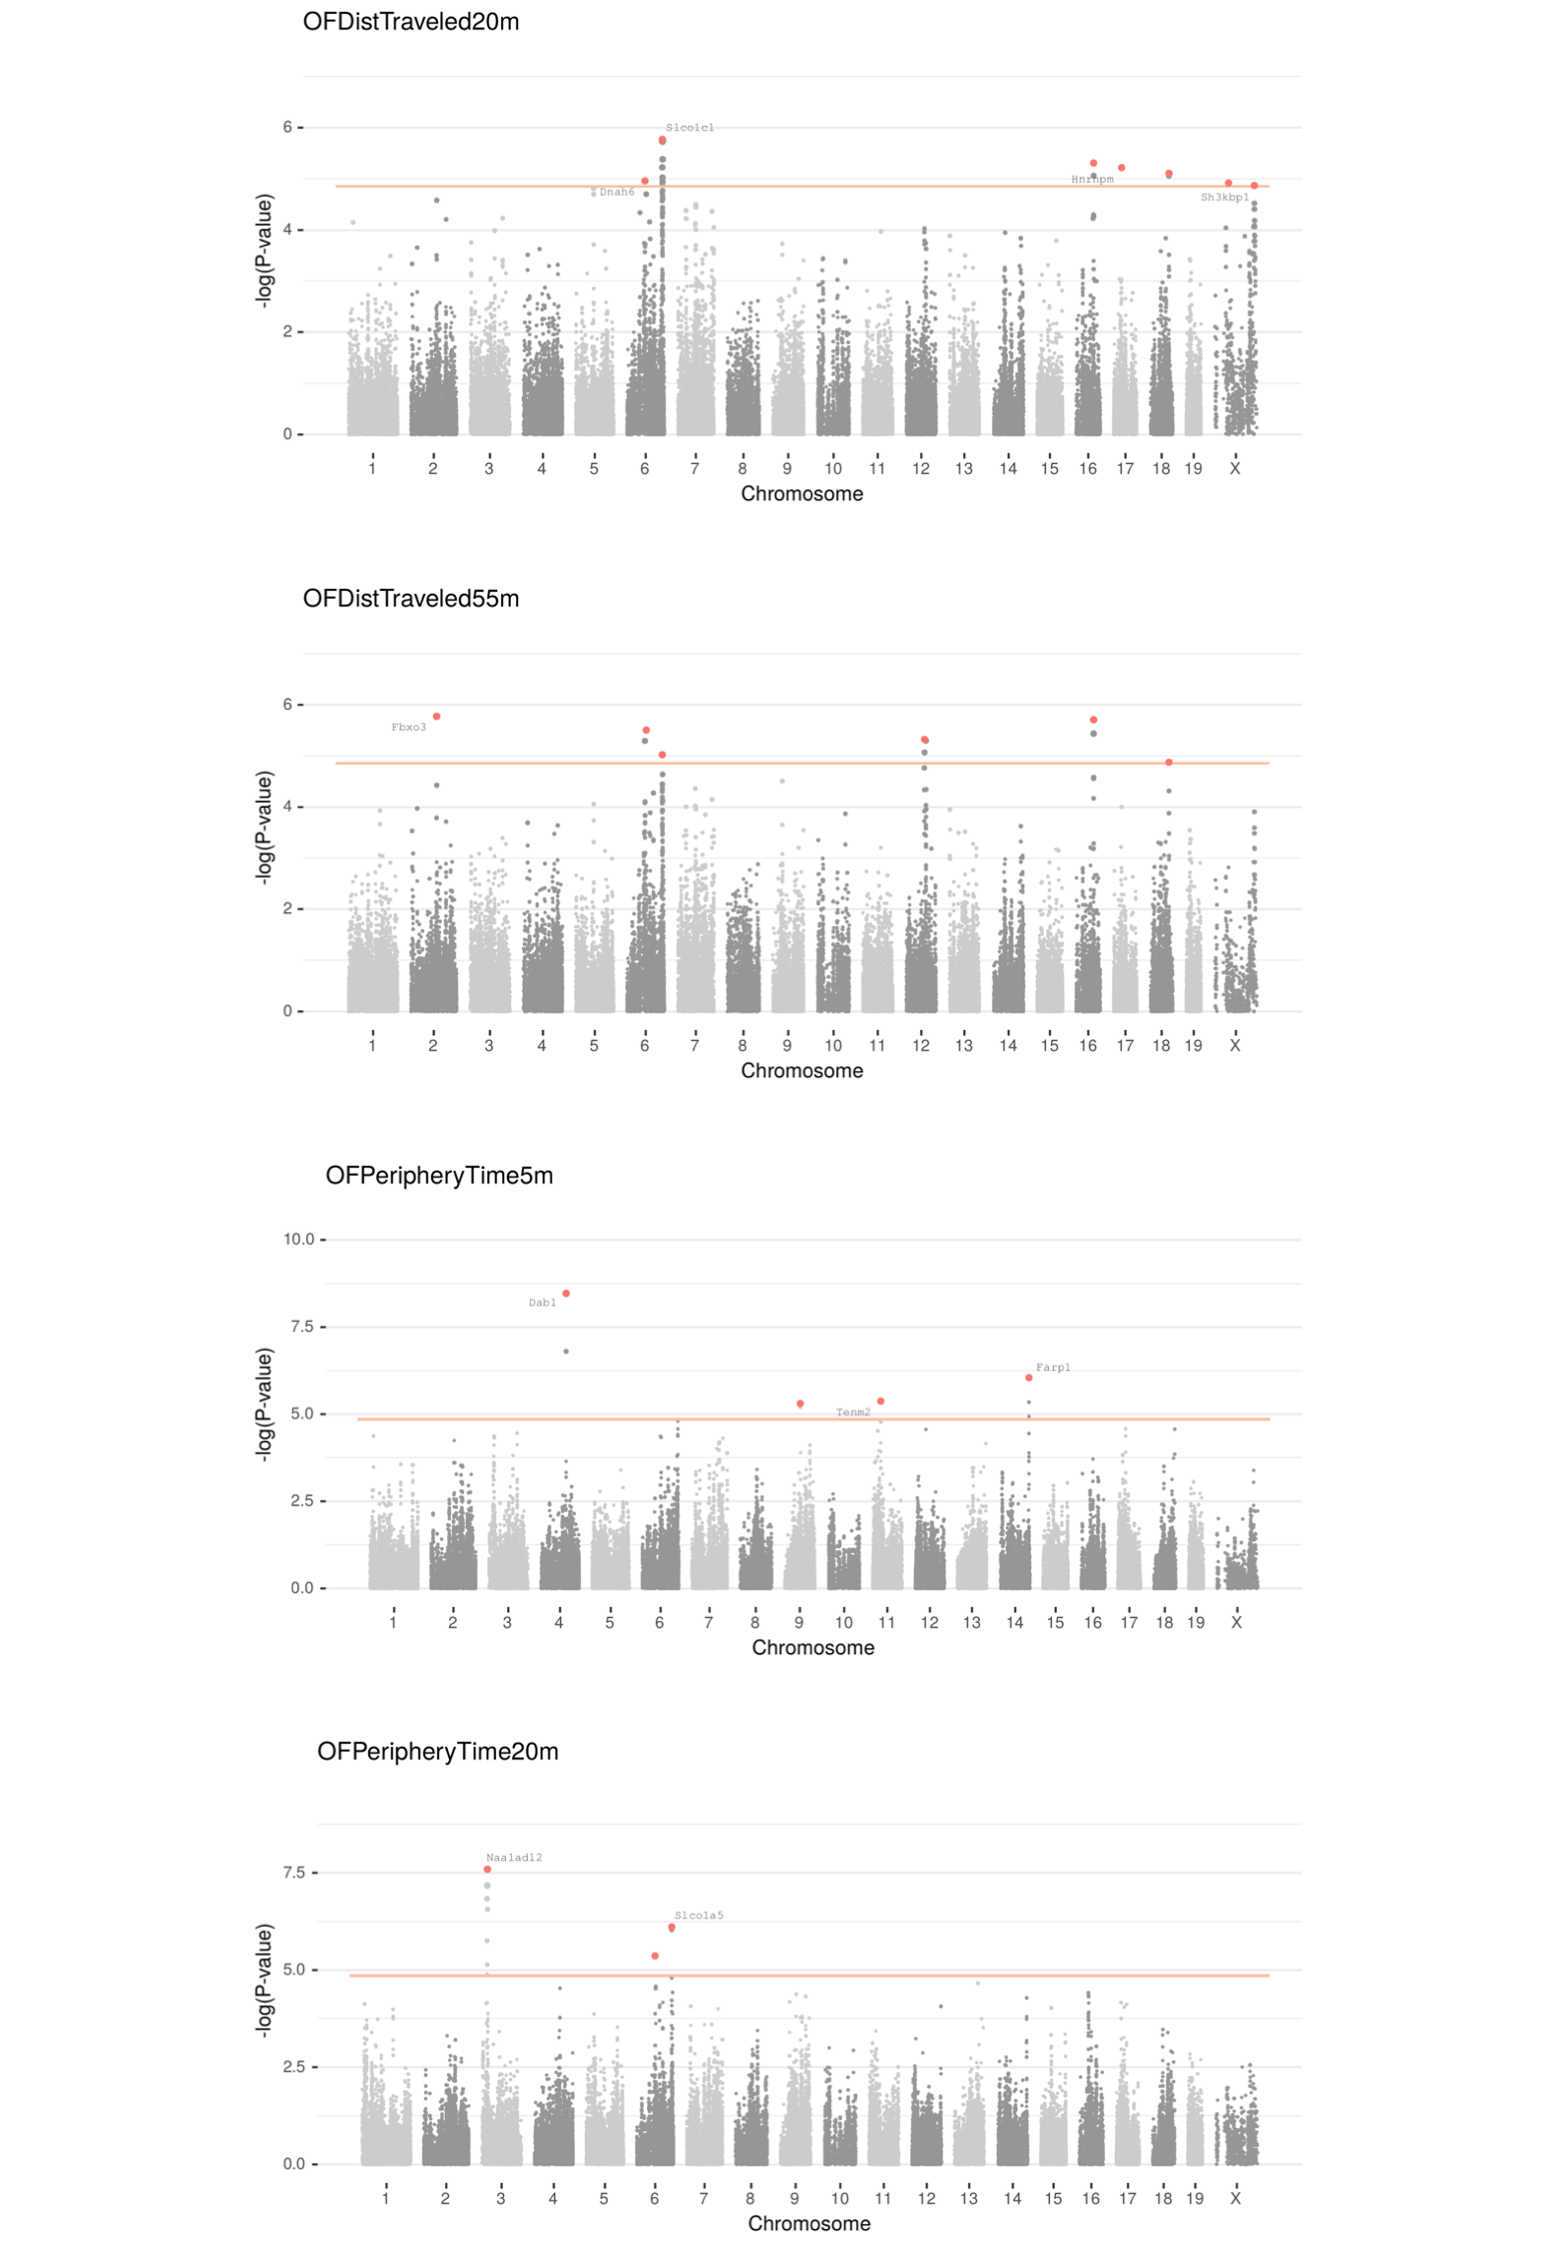

Supplement: supp [file elife-63207-supp-v1.zip › elife_poa_e63207_Figure_9_figure_supplement_5.png]

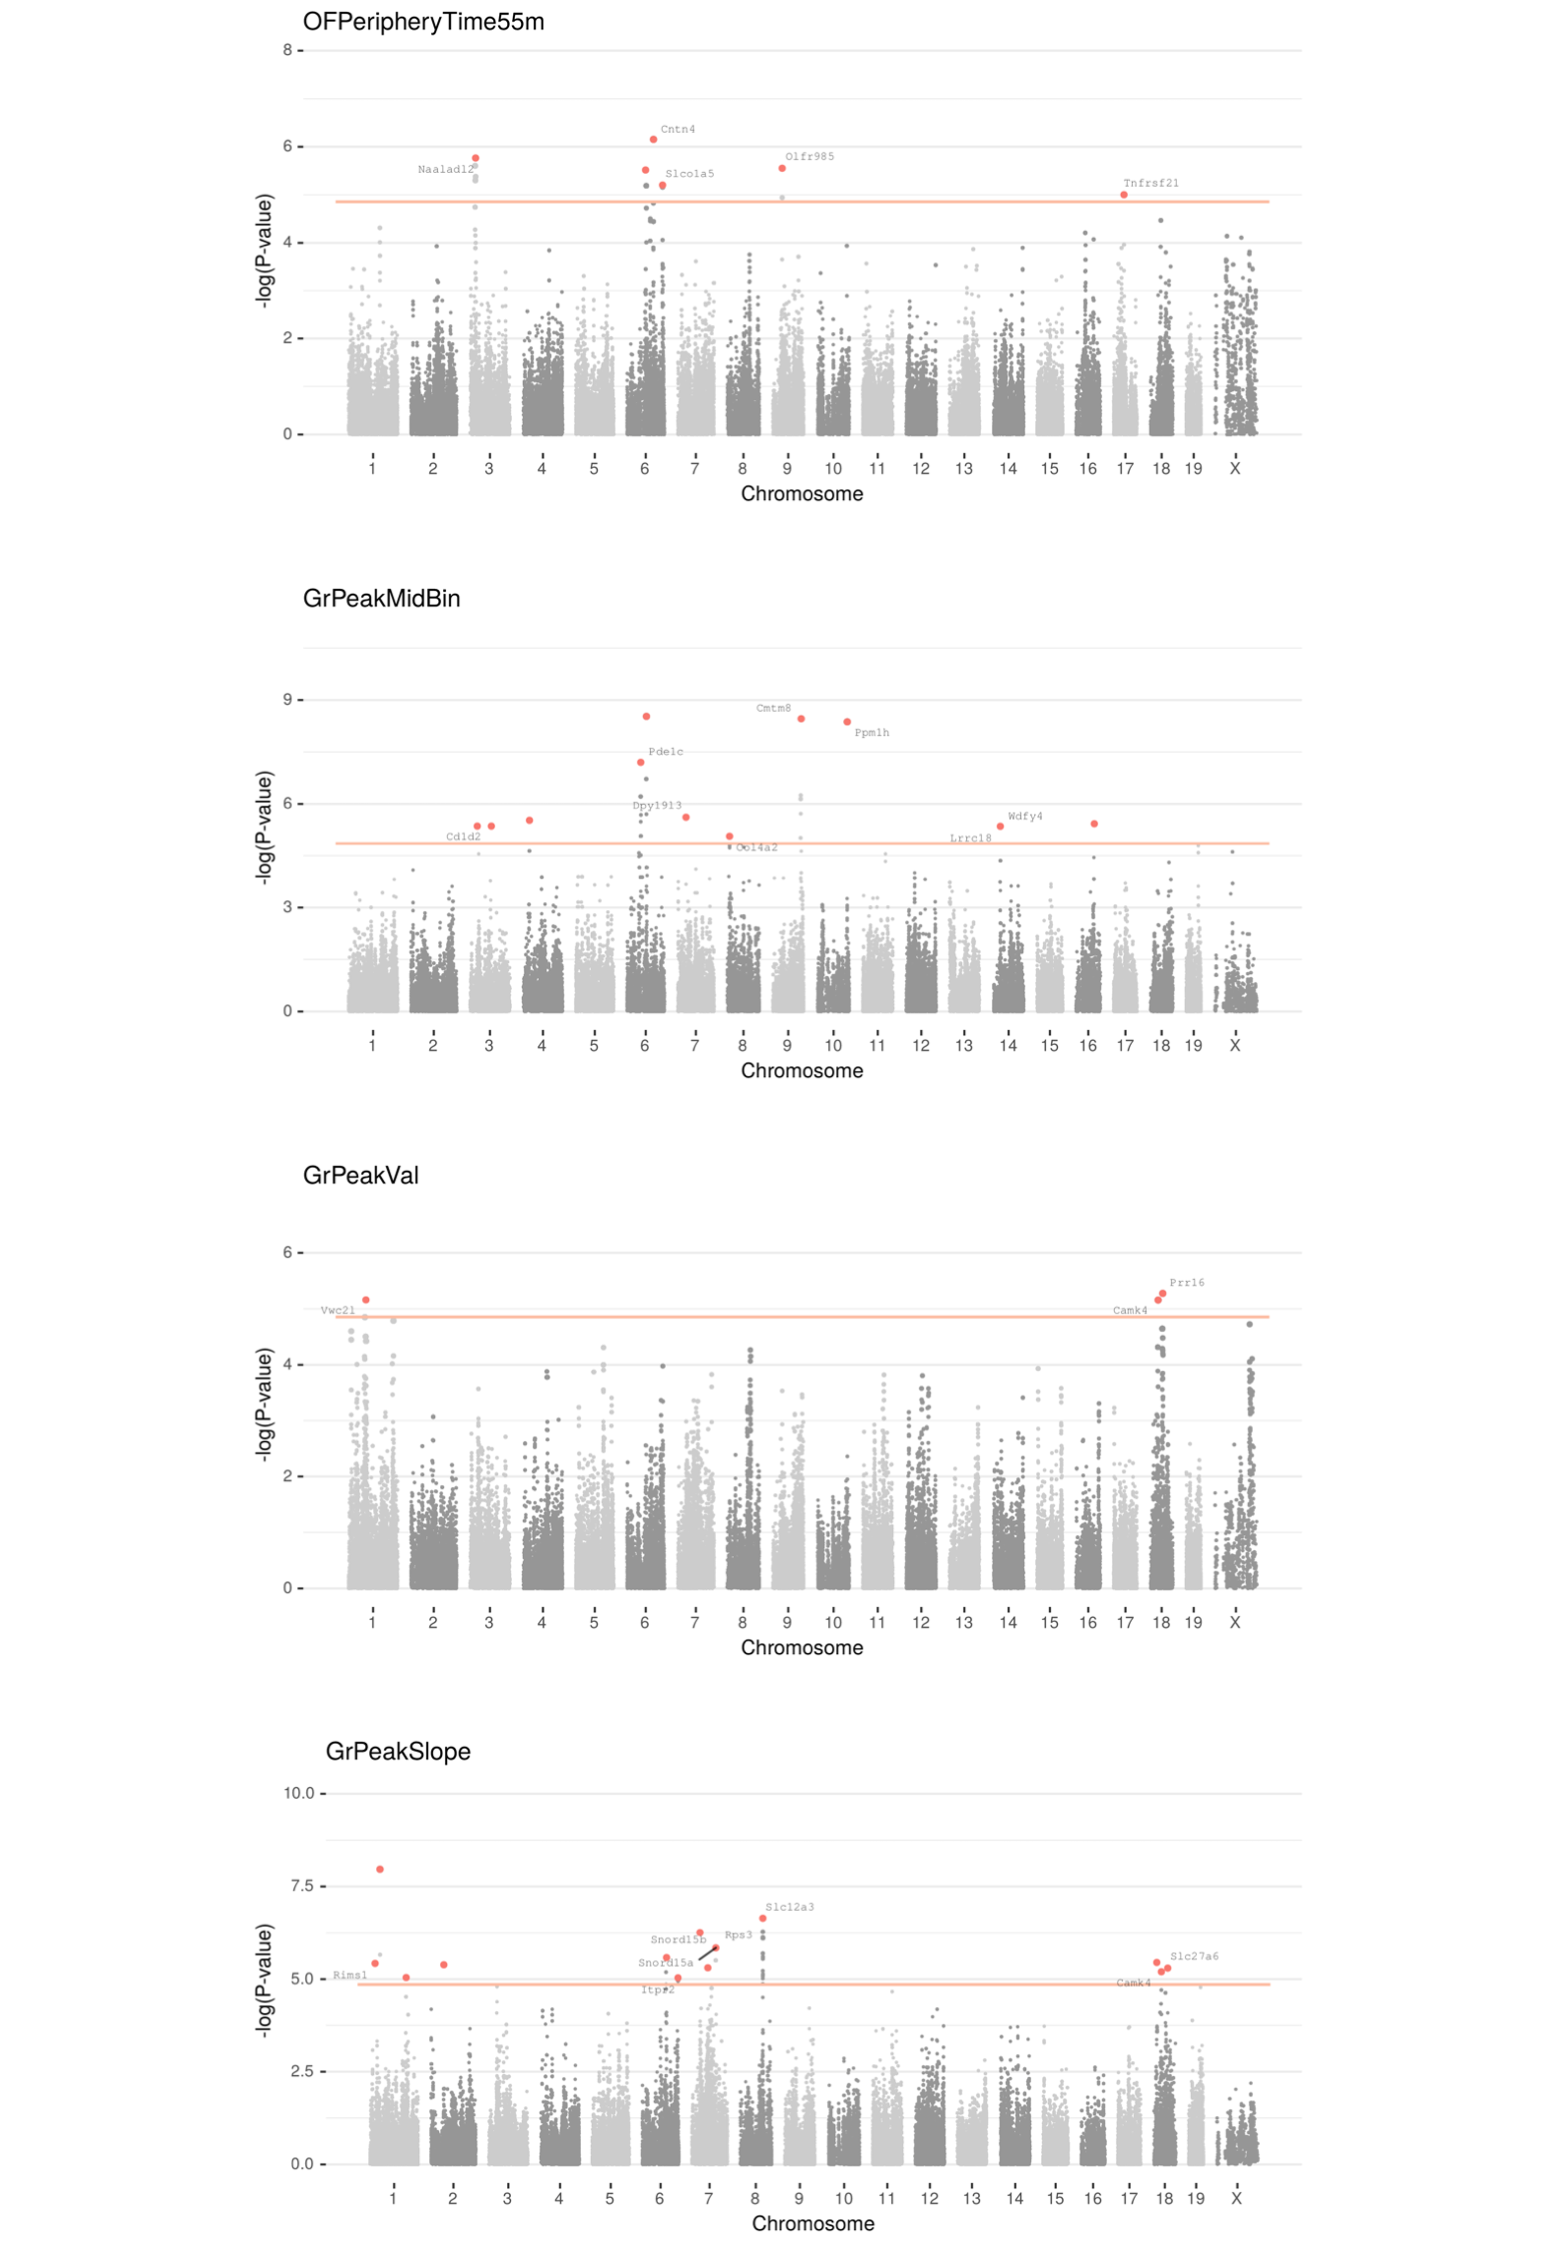

Supplement: supp [file elife-63207-supp-v1.zip › elife_poa_e63207_Figure_9_figure_supplement_6.png]

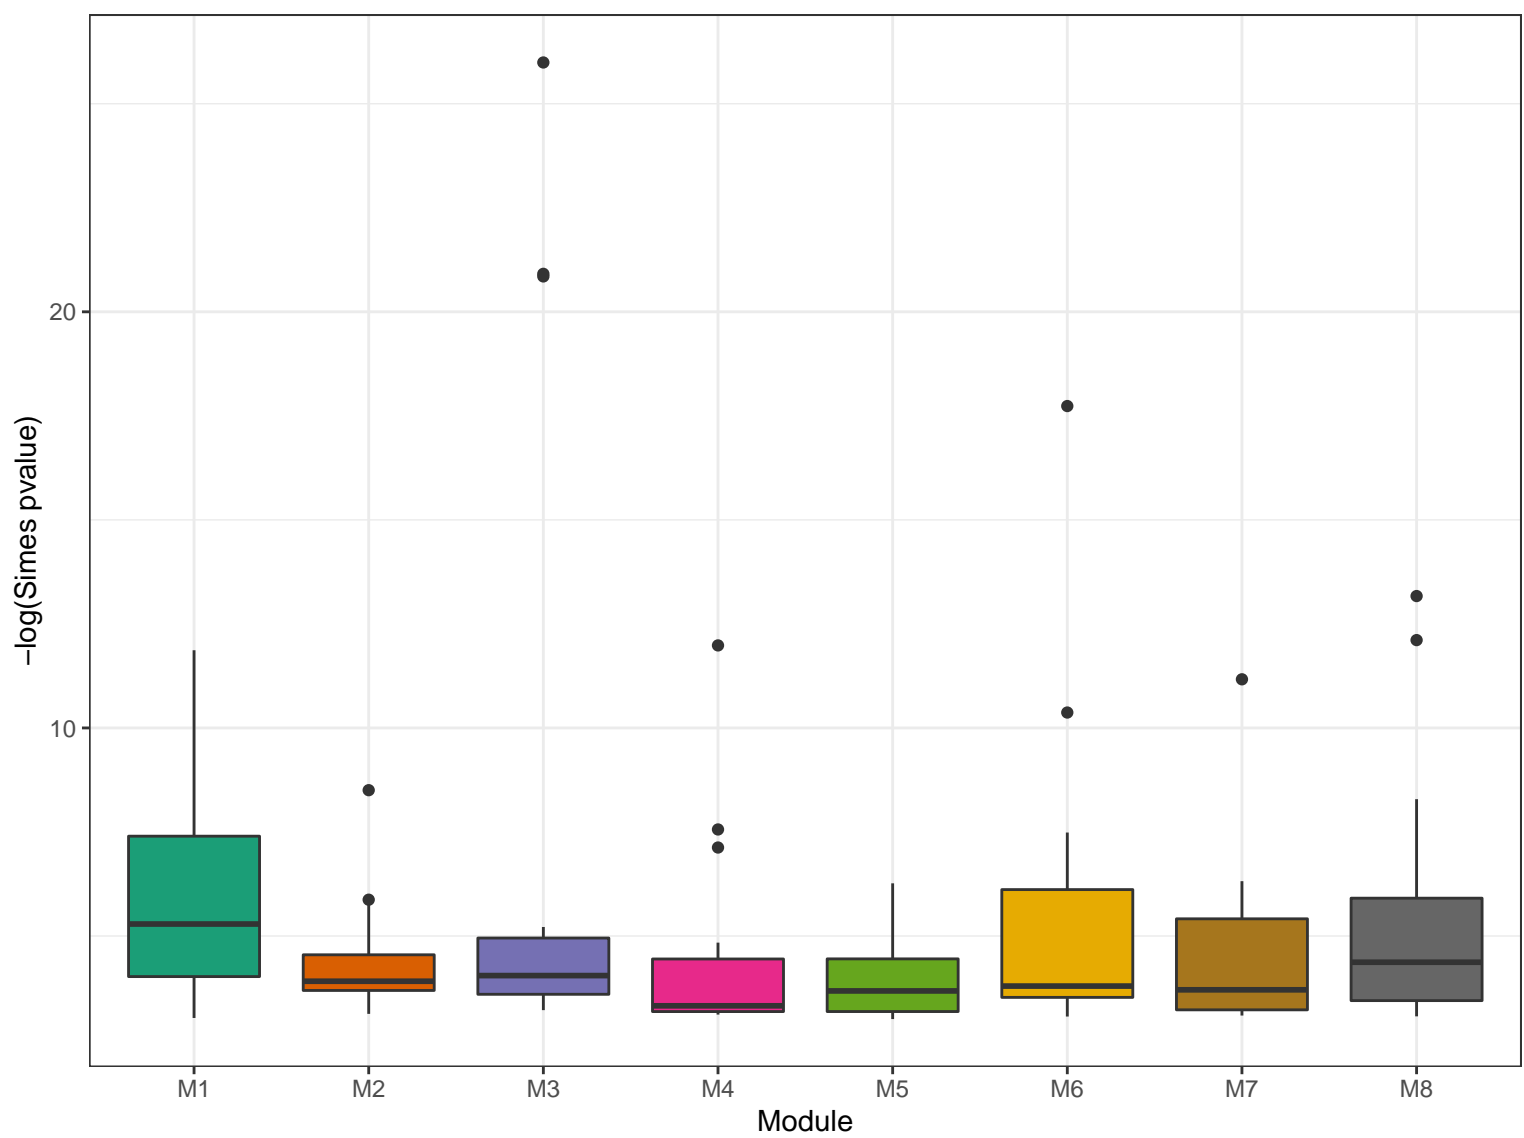

Supplement: supp [file elife-63207-supp-v1.zip › elife_poa_e63207_Figure_10_Figure_supplement_1.pdf]
